# Supplementary material for: Real-Time Monitoring of Solar Energetic Particles Using the Alpha Magnetic Spectrometer on the International Space Station
Source: MDPI journal article supplement (doi:10.3390/instruments7040038), 2023-10-31
Supplement: s1 [file s1]

## Supplementary Materials: AMS live-time and trigger rate distributions

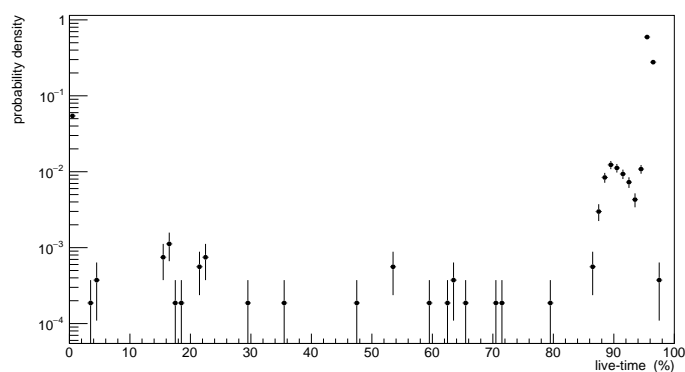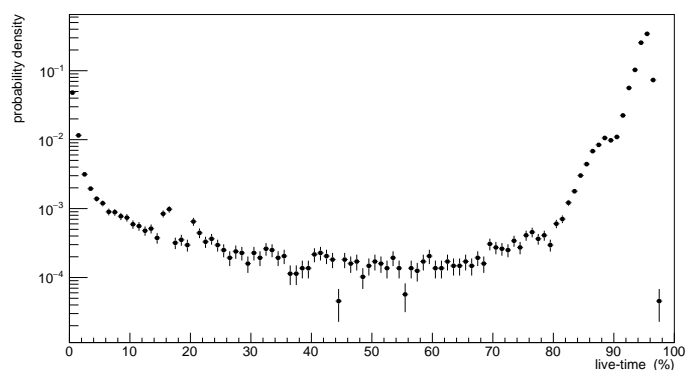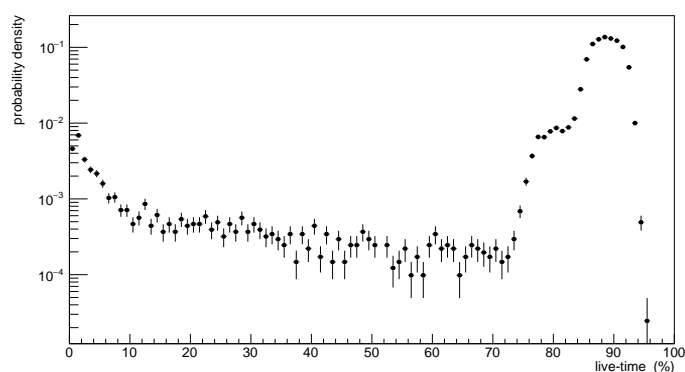

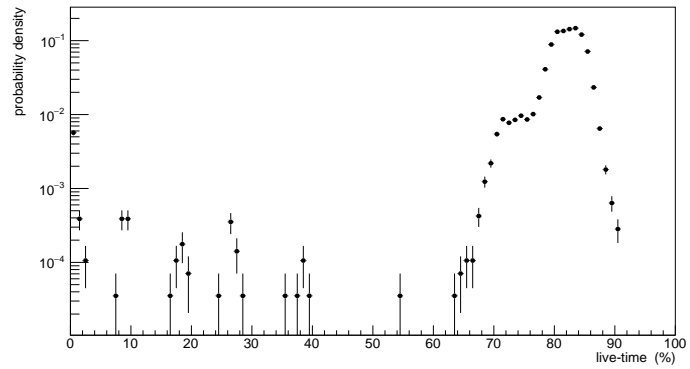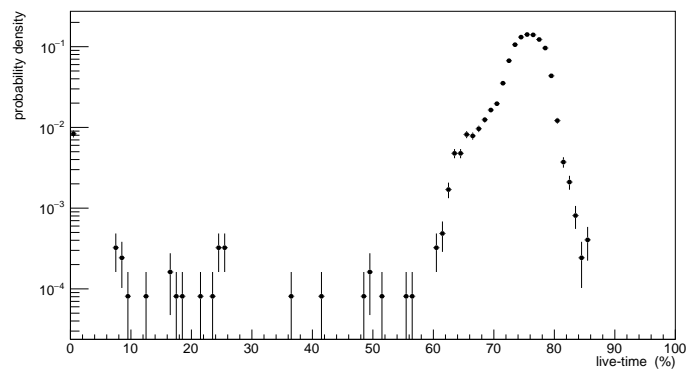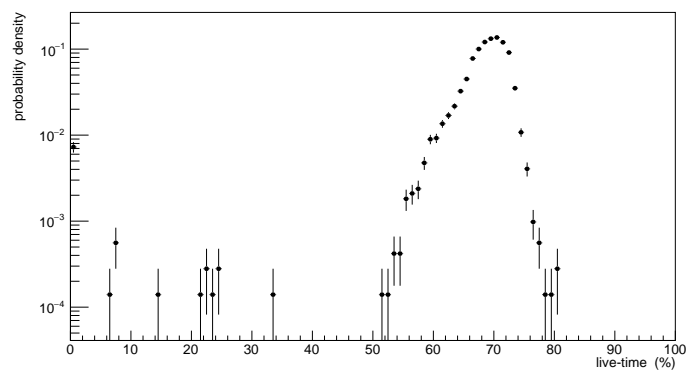

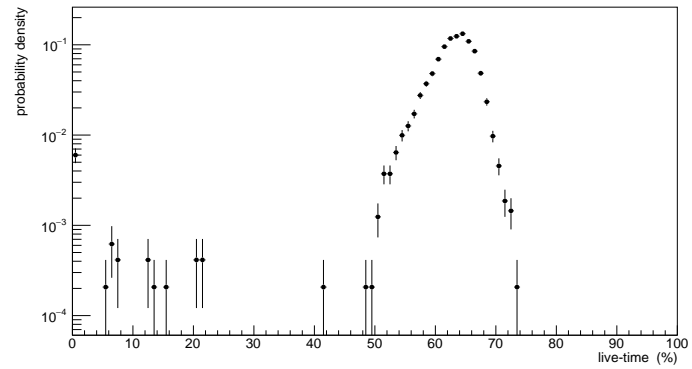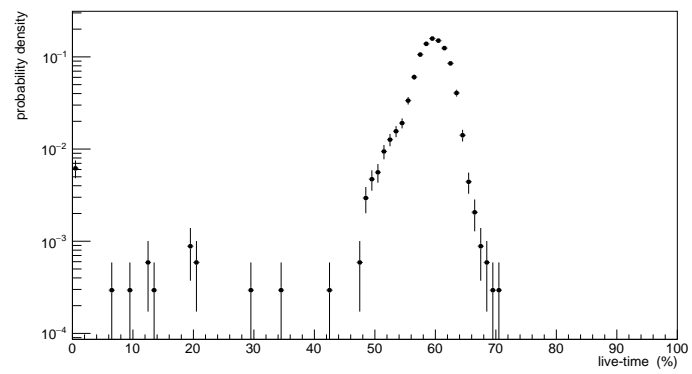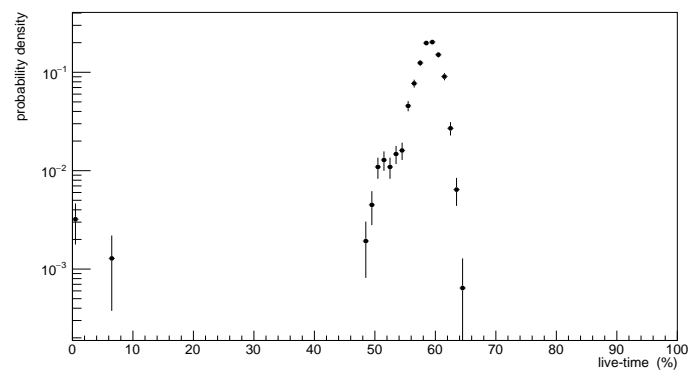

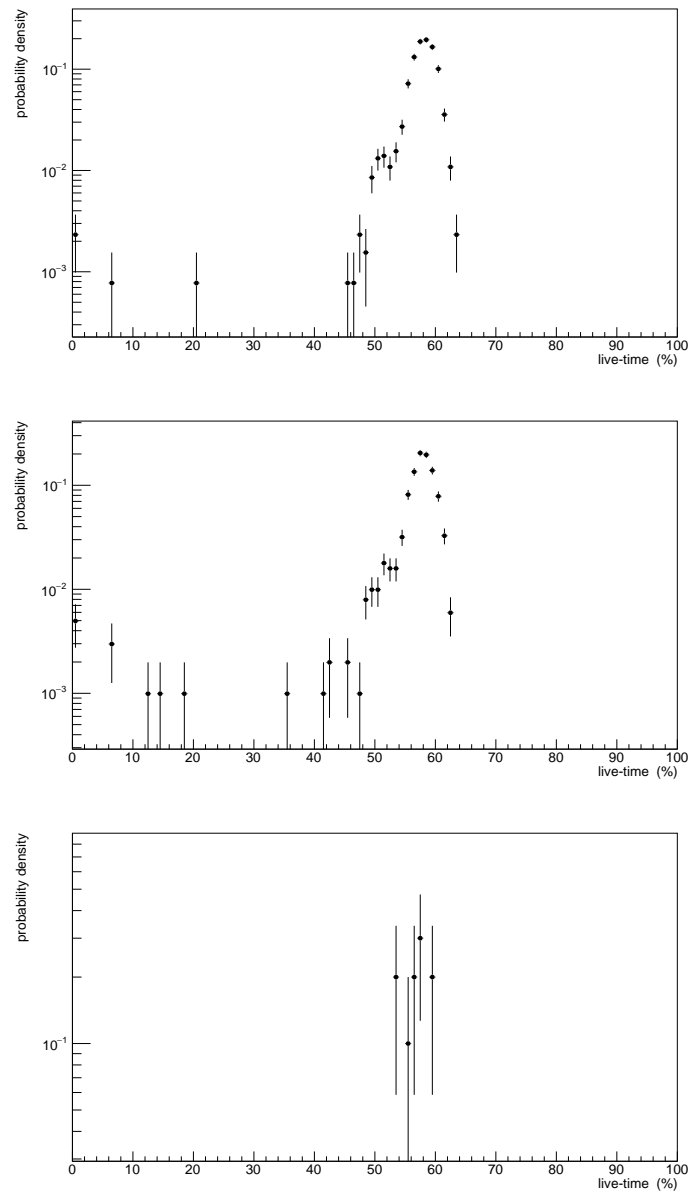

**Figure S1.** Distributions of AMS-02 live-time of January, 2020. Each panel (a-l) shows the distribution obtained for a specific  $L$  bin; the bins span between  $0.5 R_0$  and  $6.5 R_0$  and are  $0.5 R_0$  wide.

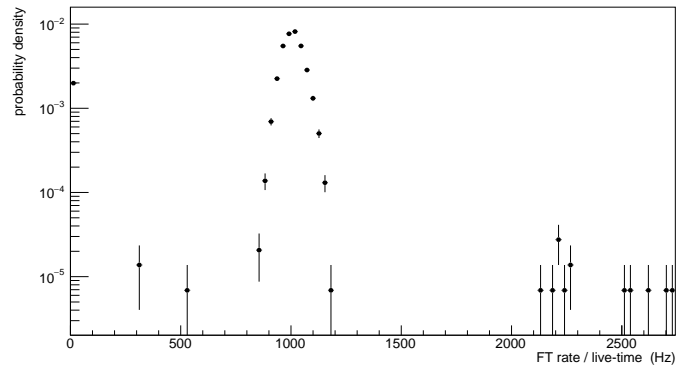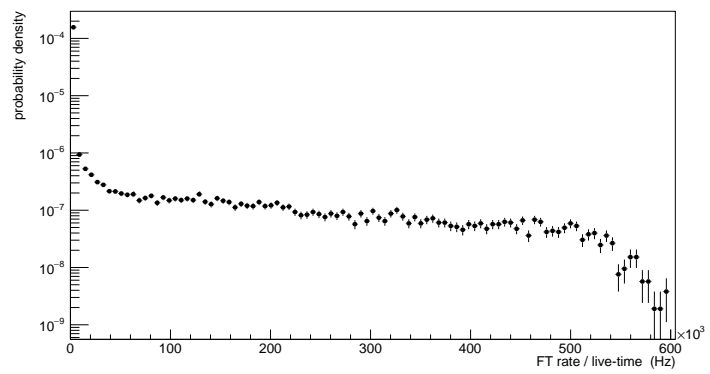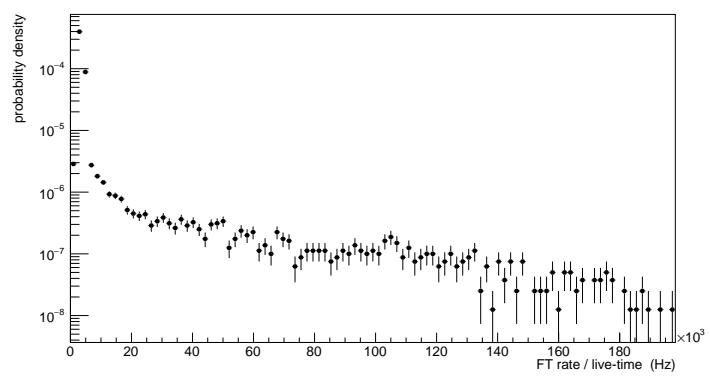

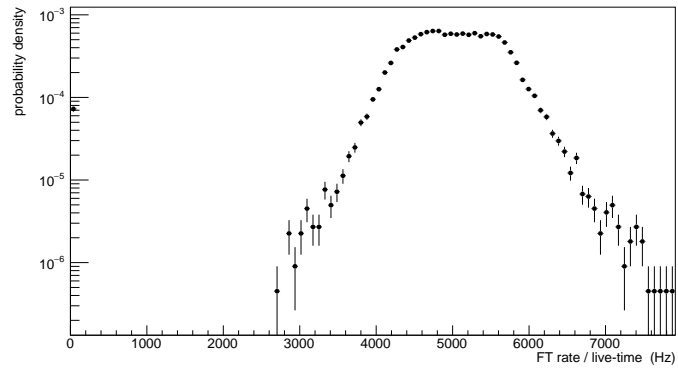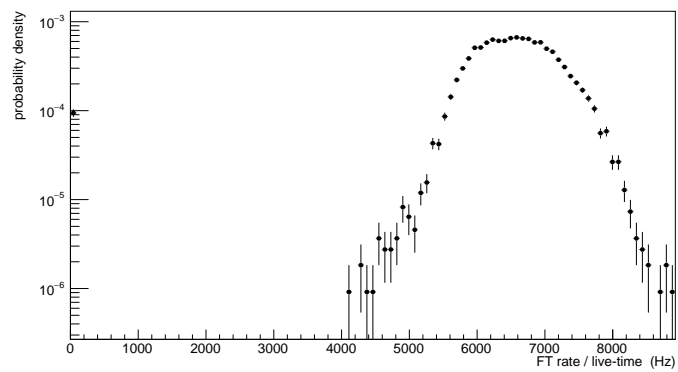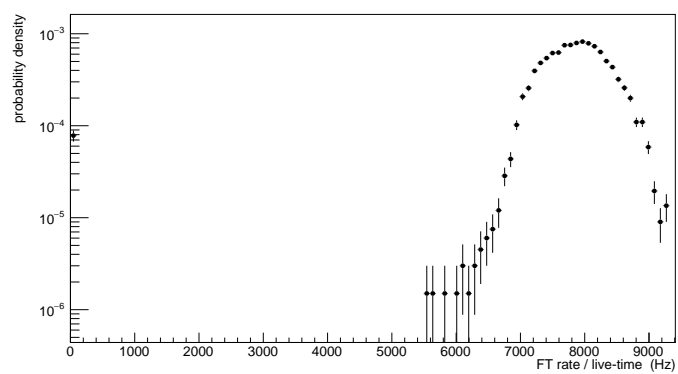

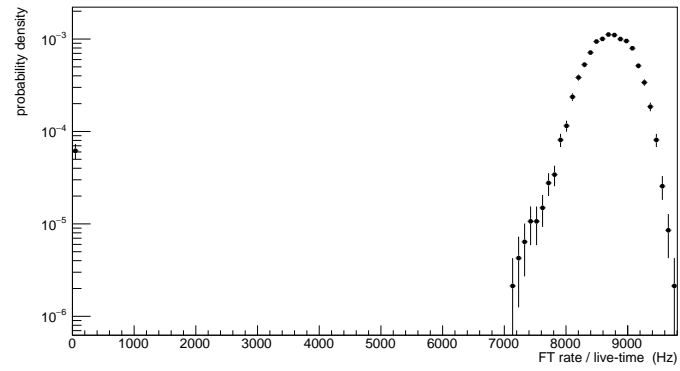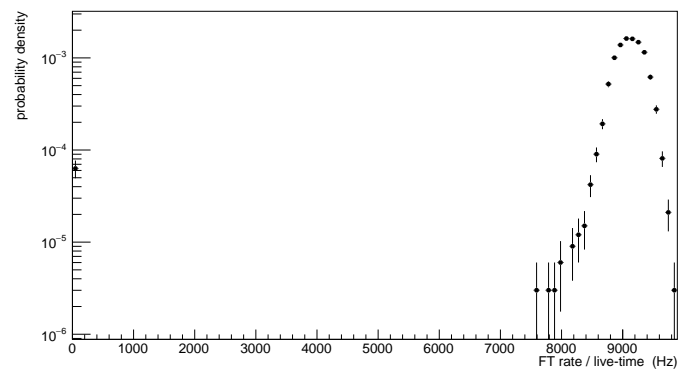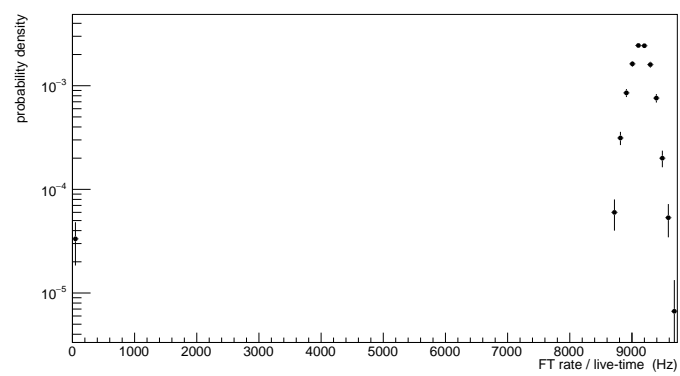

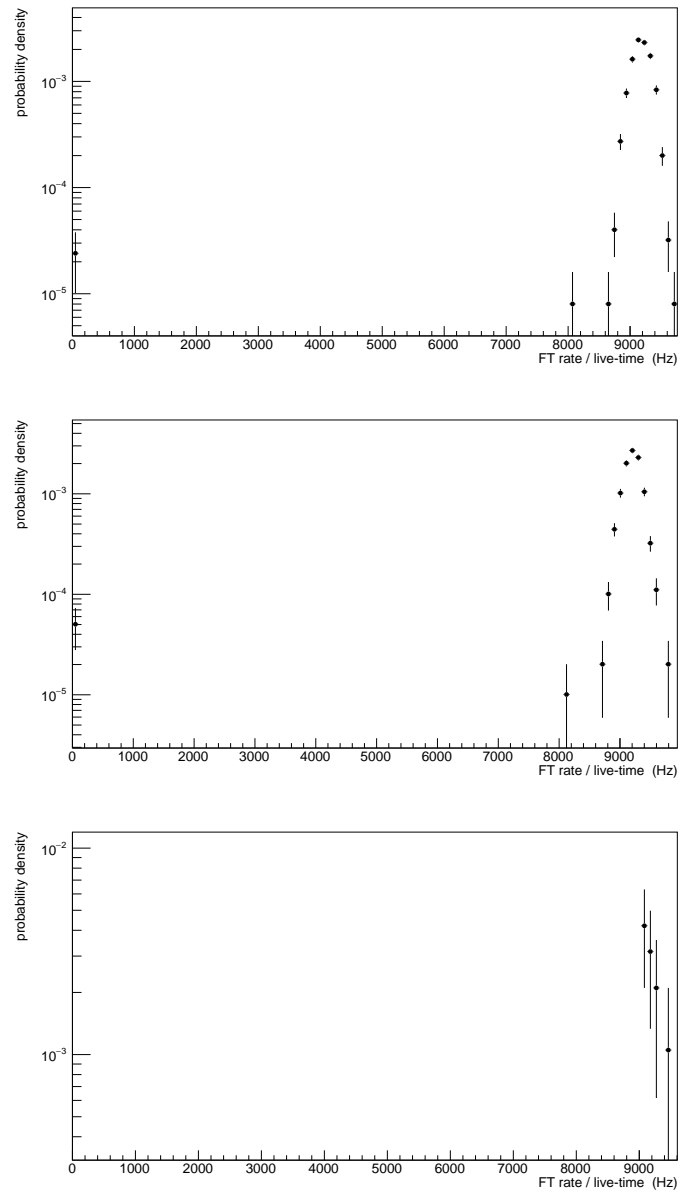

**Figure S2.** Distributions of AMS-02 trigger rate FT (corrected by the live-time) of January, 2020. Each panel (a-l) shows the distribution obtained for a specific  $L$  bin; the bins span between  $0.5 R_0$  and  $6.5 R_0$  and are  $0.5 R_0$  wide.



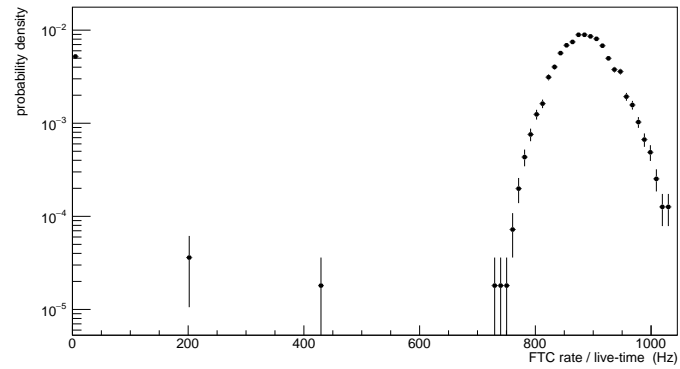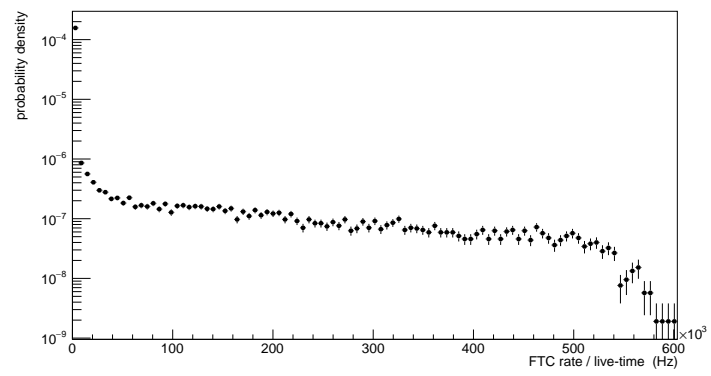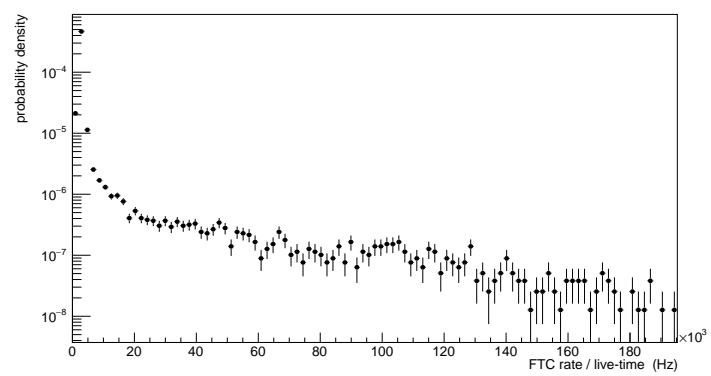

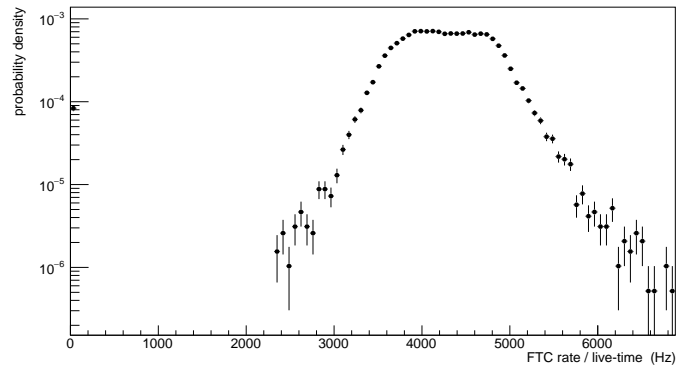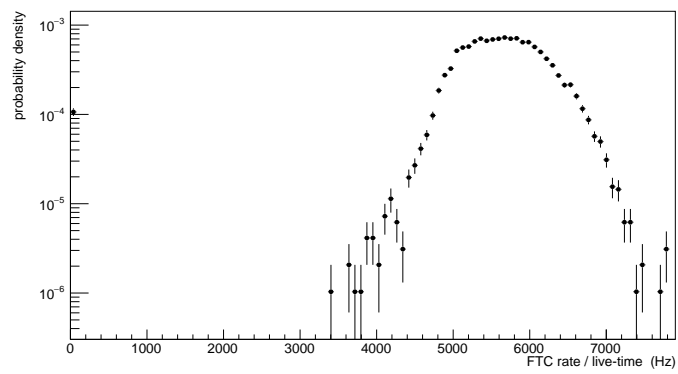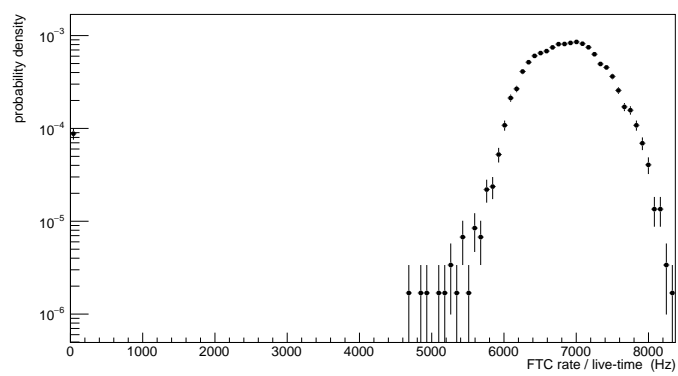

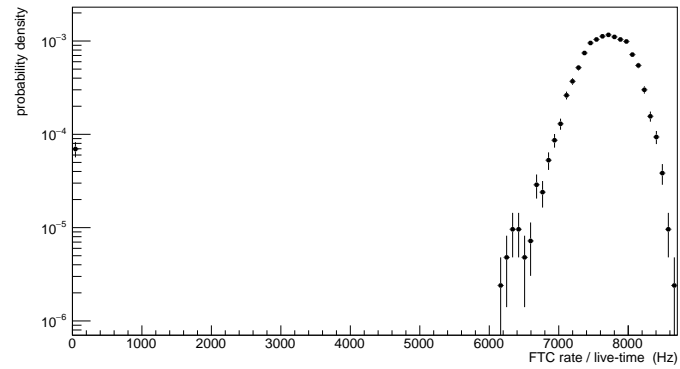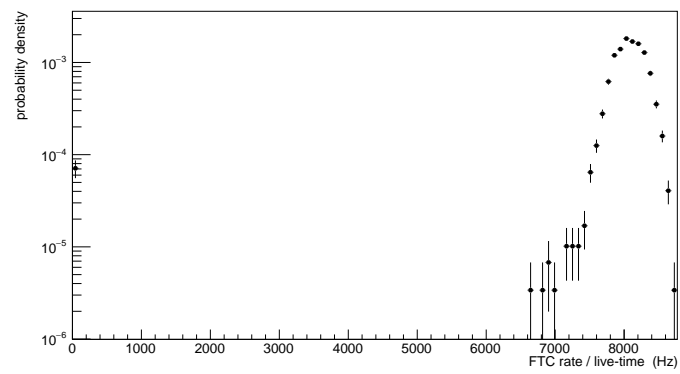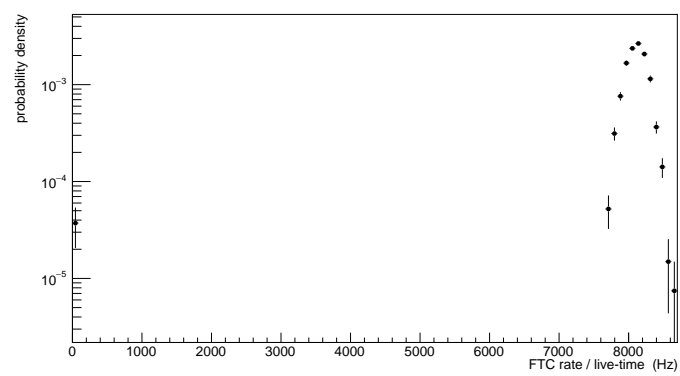

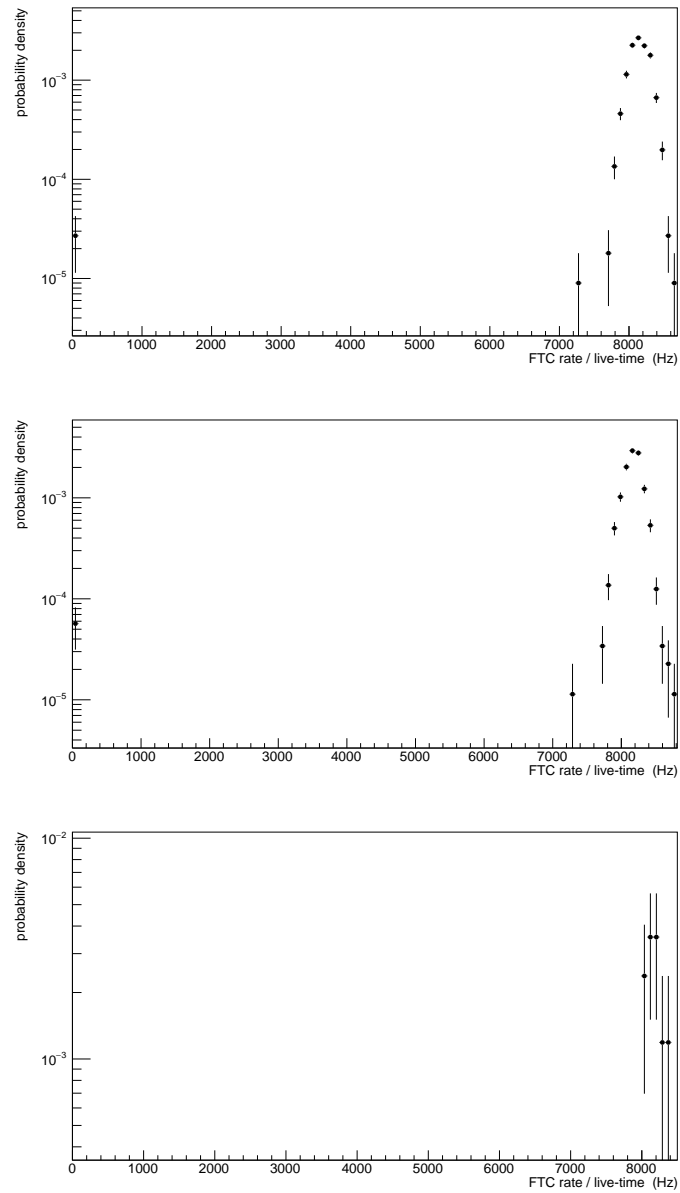

**Figure S3.** Distributions of AMS-02 trigger rate FTC (corrected by the live-time) of January, 2020. Each panel (a-l) shows the distribution obtained for a specific  $L$  bin; the bins span between  $0.5 R_0$  and  $6.5 R_0$  and are  $0.5 R_0$  wide.

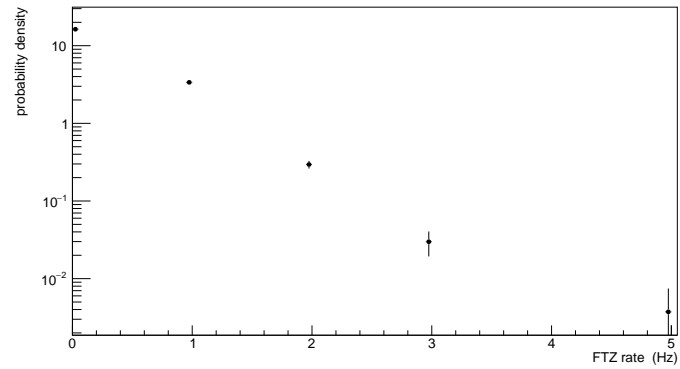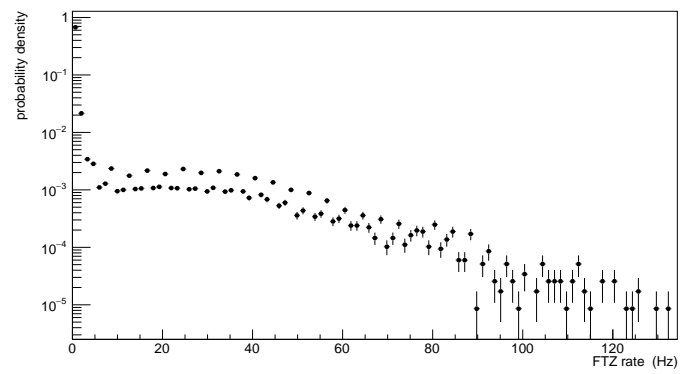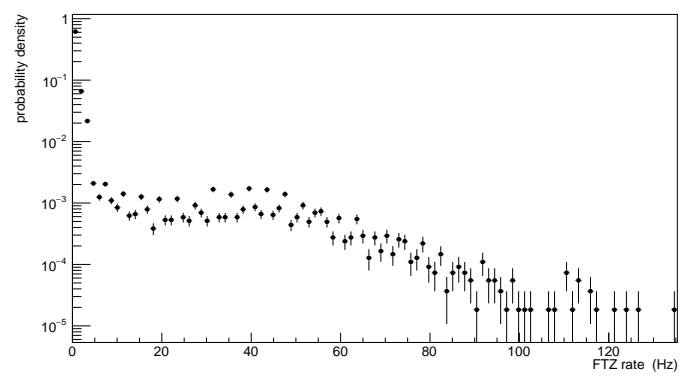

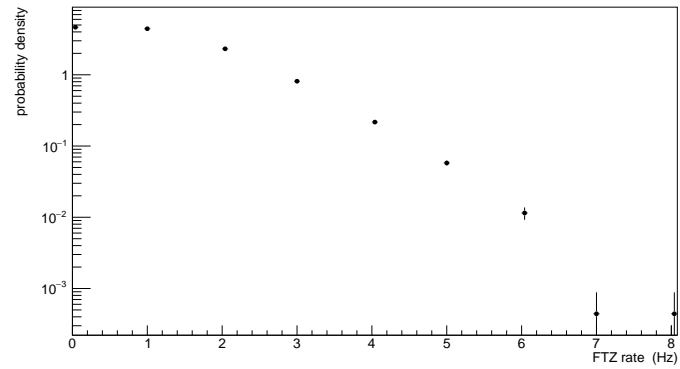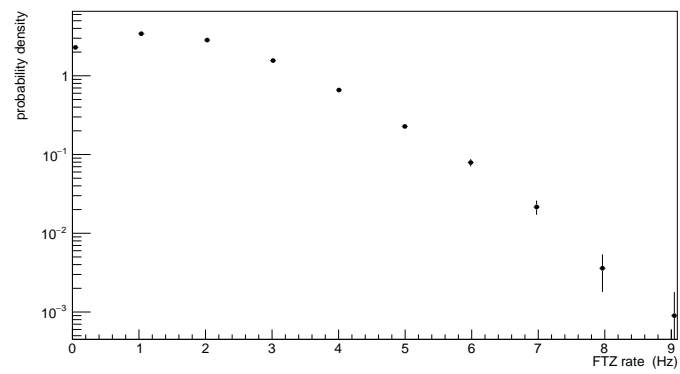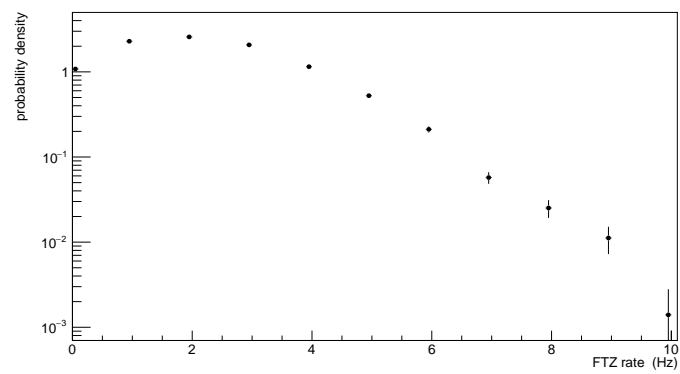

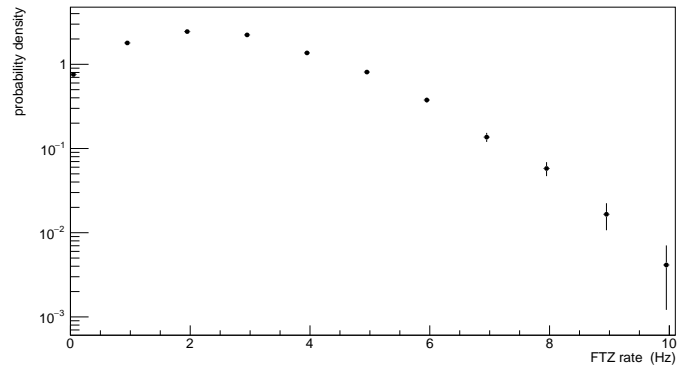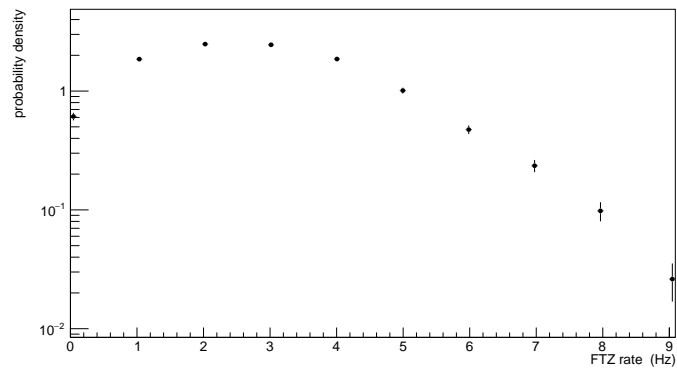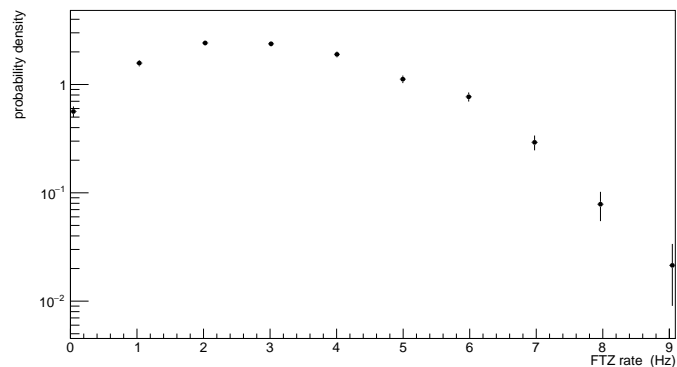

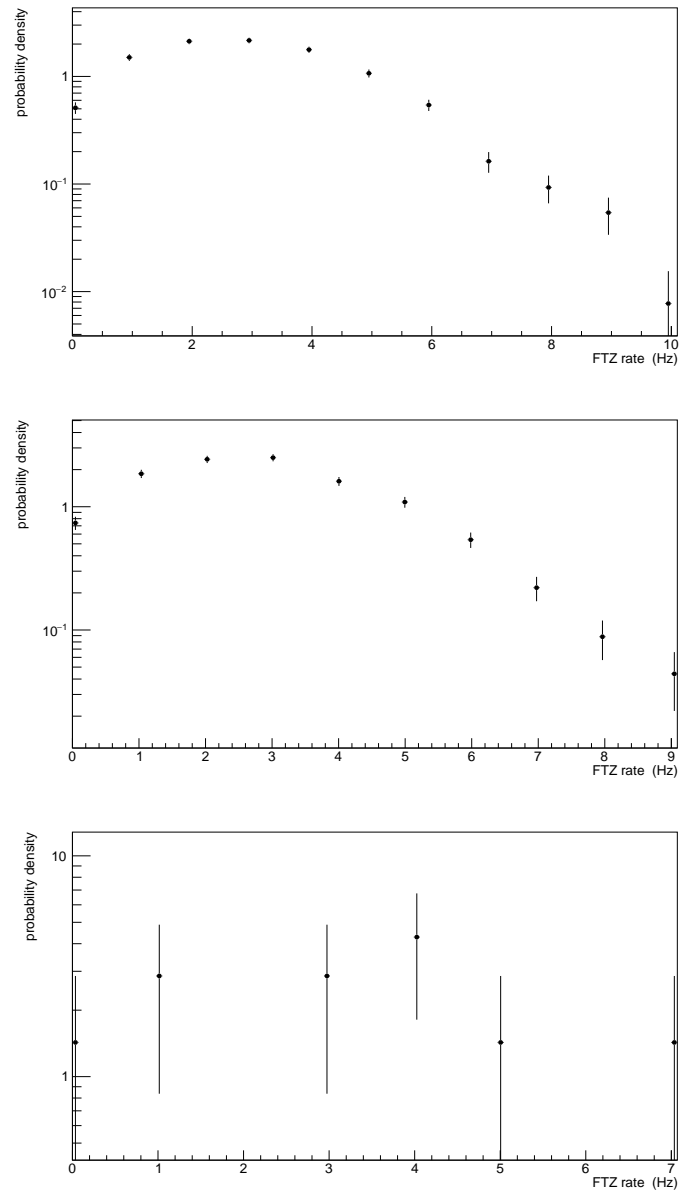

**Figure S4.** Distributions of AMS-02 trigger rate FTZ (raw) of January, 2020. Each panel (a-l) shows the distribution obtained for a specific  $L$  bin; the bins span between  $0.5 R_0$  and  $6.5 R_0$  and are  $0.5 R_0$  wide.



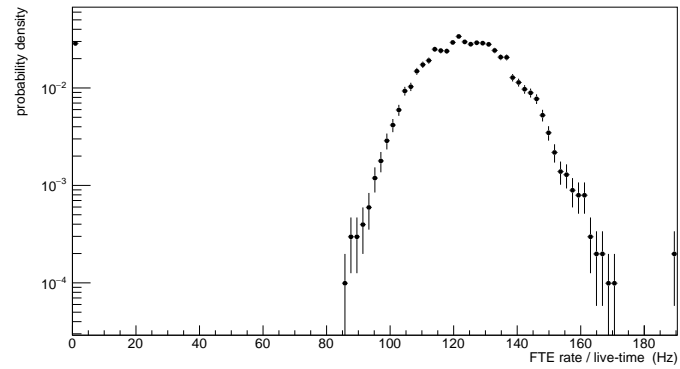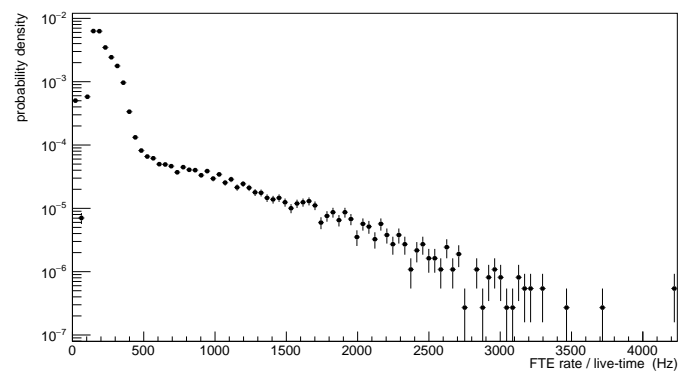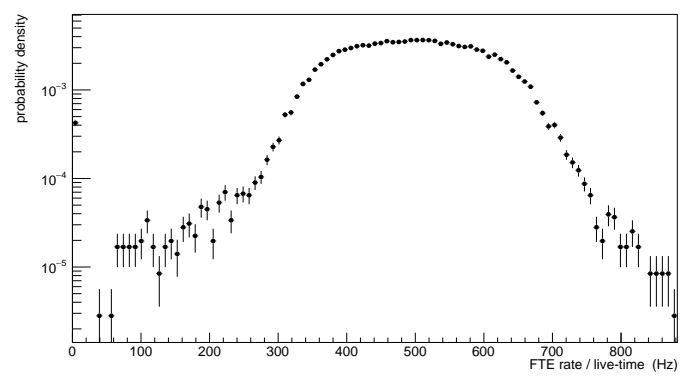

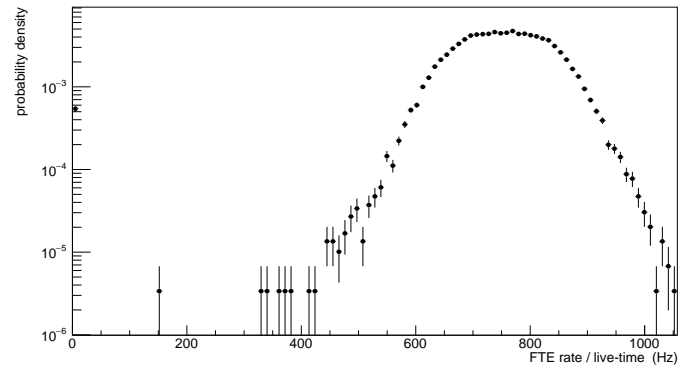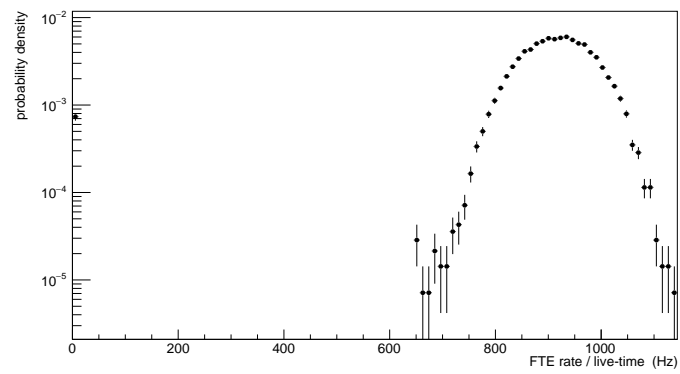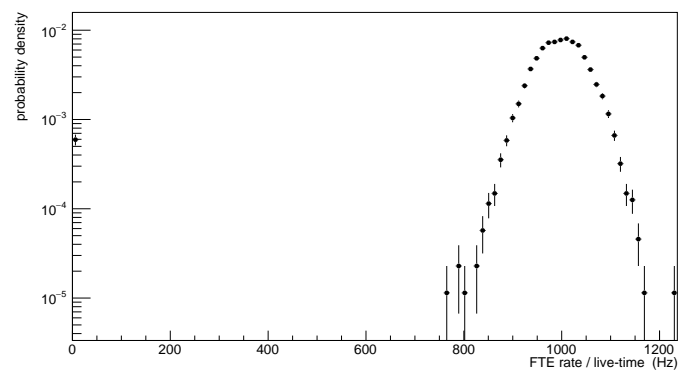

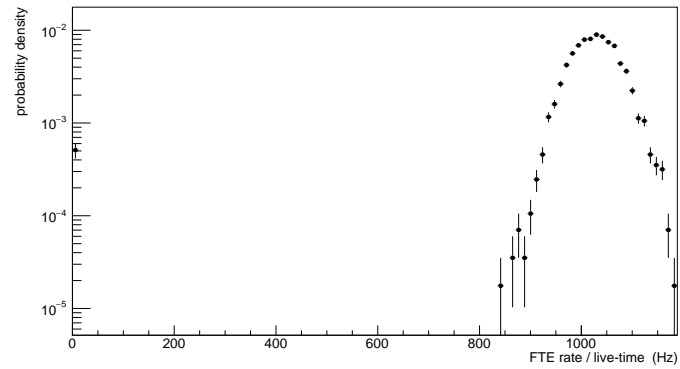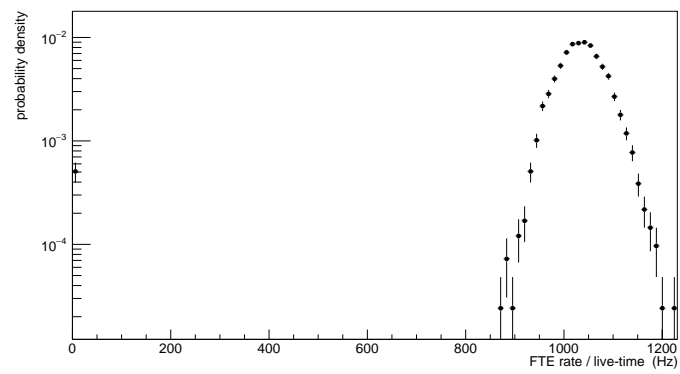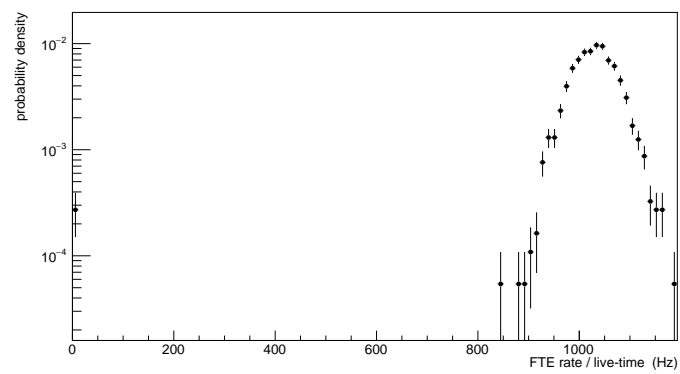

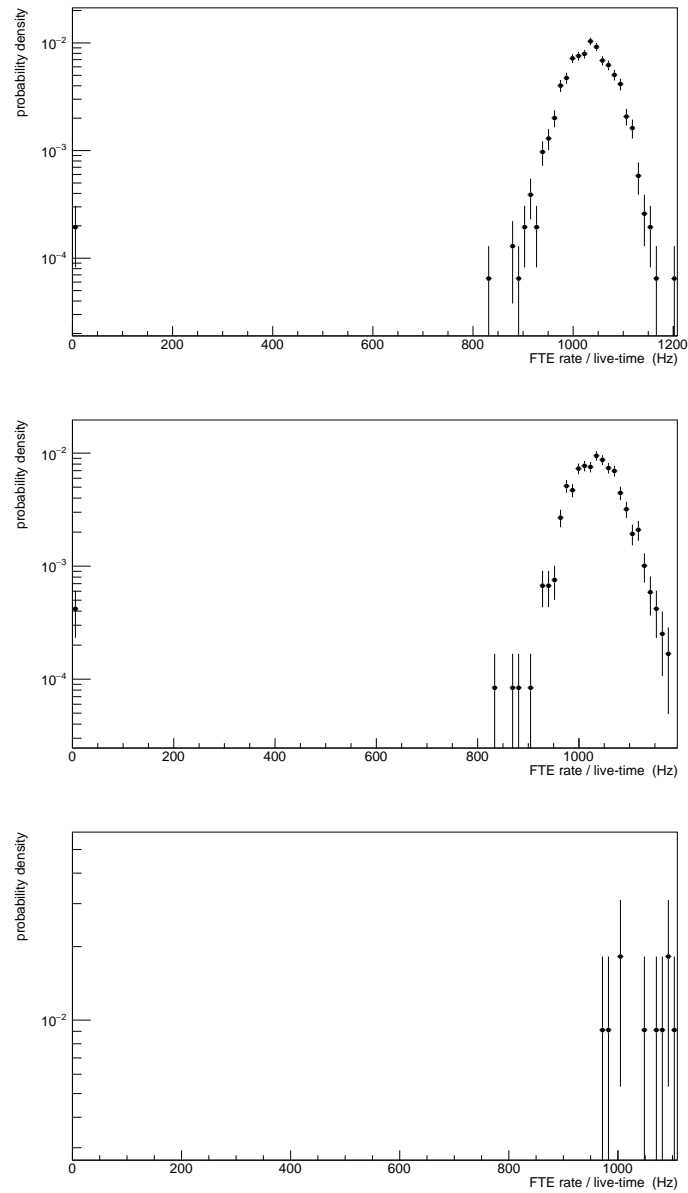

**Figure S5.** Distributions of AMS-02 trigger rate FTE (corrected by the live-time) of January, 2020. Each panel (a-l) shows the distribution obtained for a specific  $L$  bin; the bins span between  $0.5 R_0$  and  $6.5 R_0$  and are  $0.5 R_0$  wide.

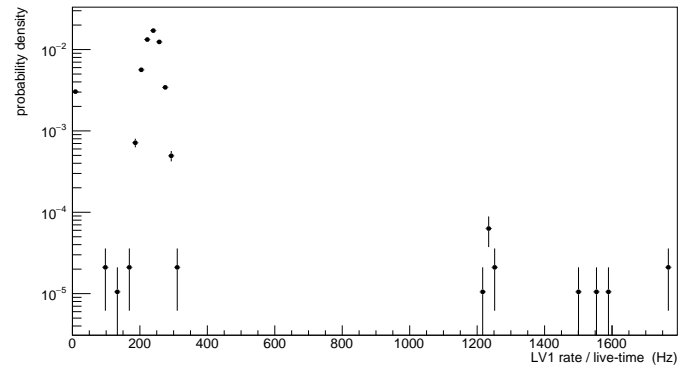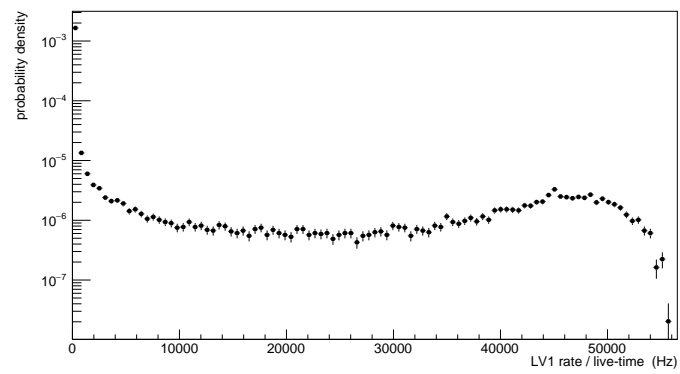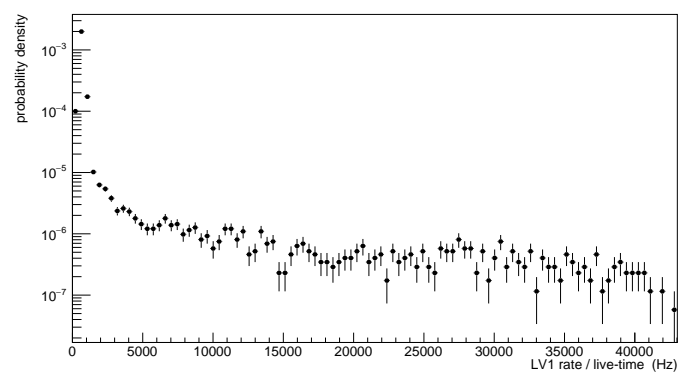

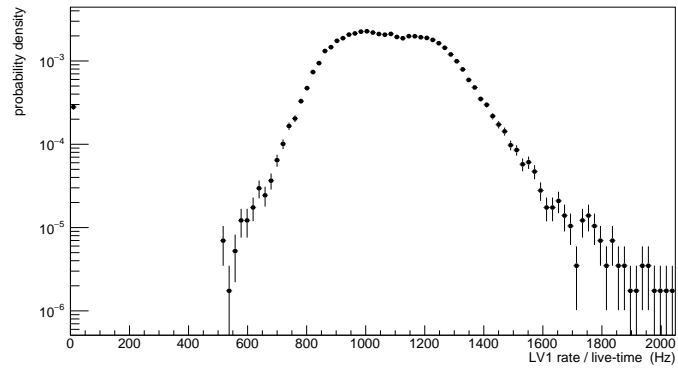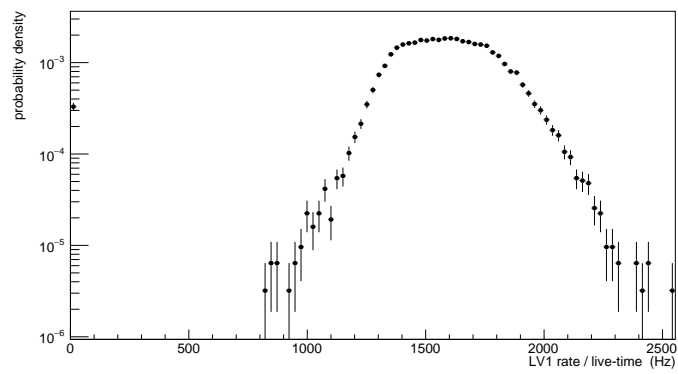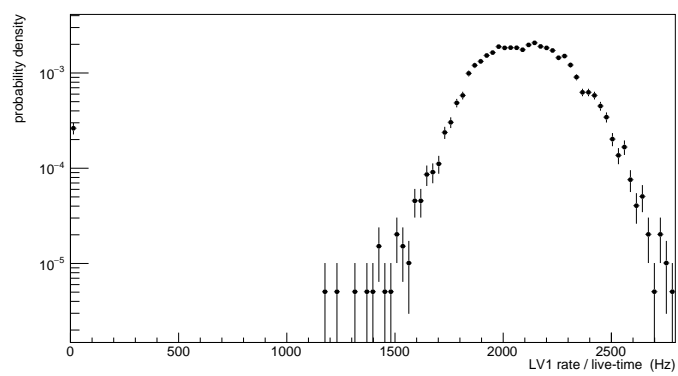

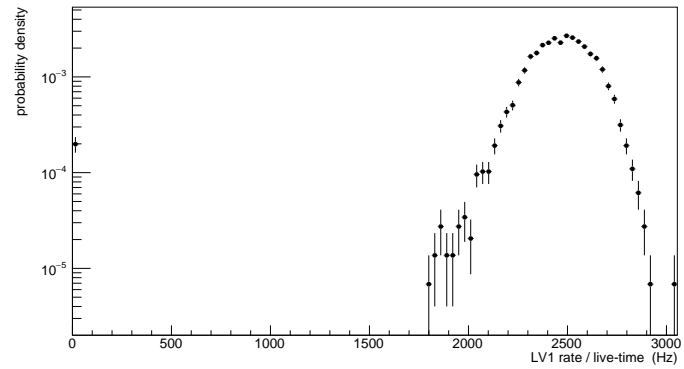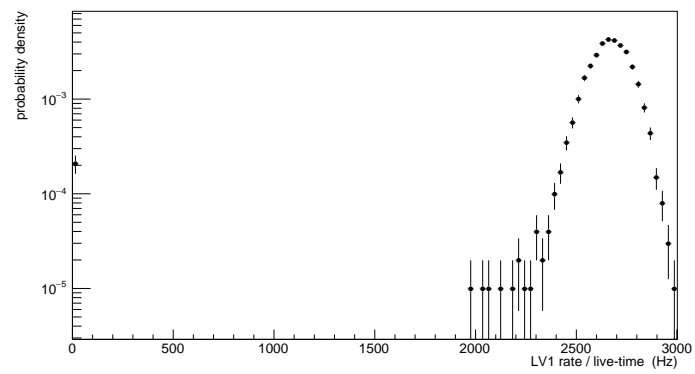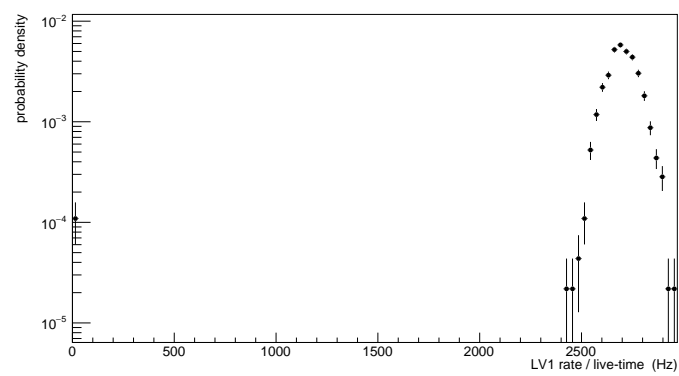

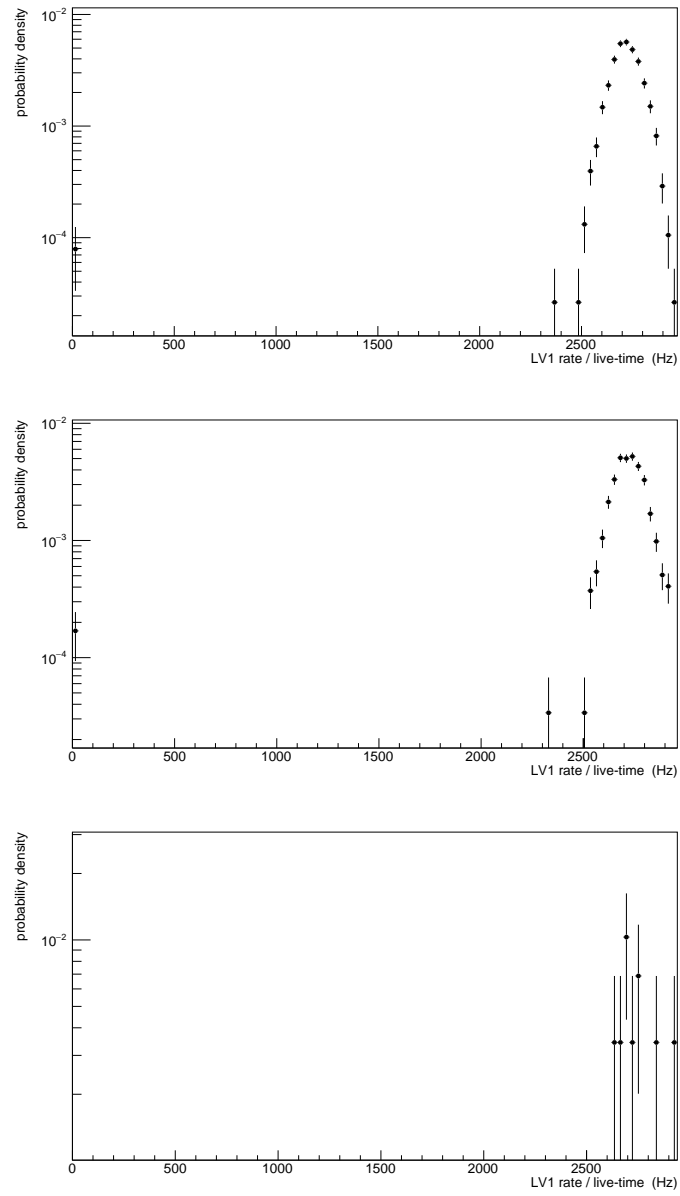

**Figure S6.** Distributions of AMS-02 trigger rate LV1 (corrected by the live-time) of January, 2020. Each panel (a-l) shows the distribution obtained for a specific  $L$  bin; the bins span between  $0.5 R_0$  and  $6.5 R_0$  and are  $0.5 R_0$  wide.



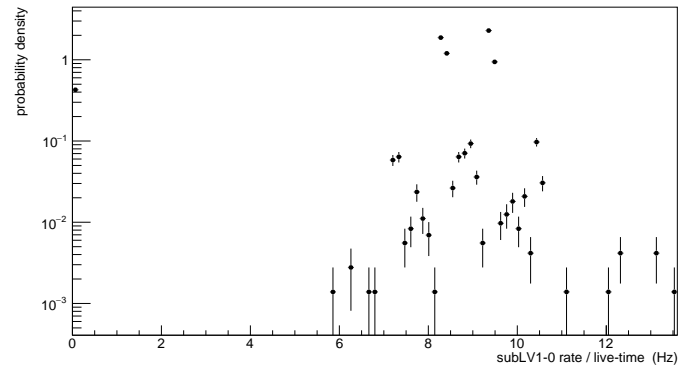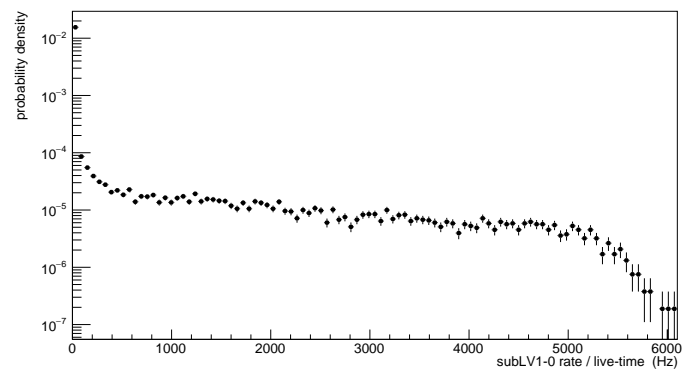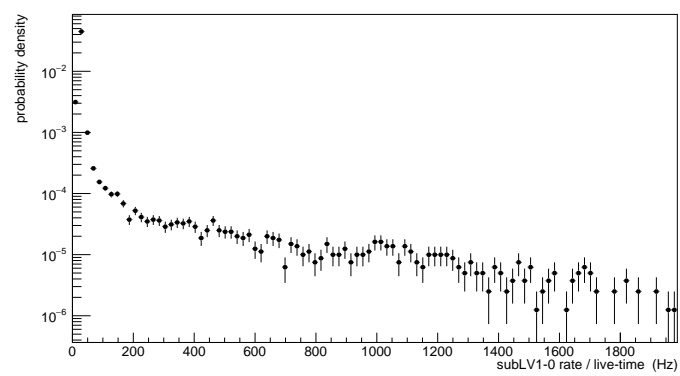

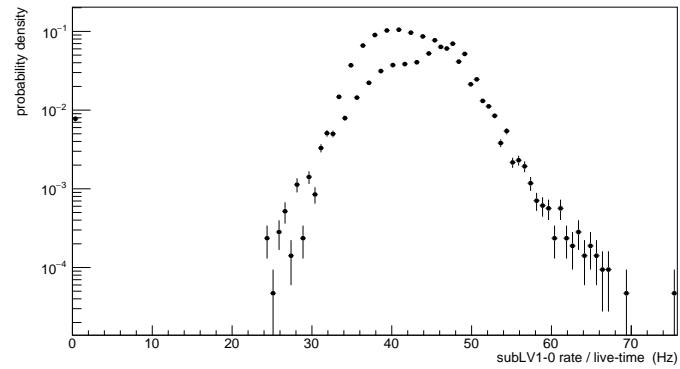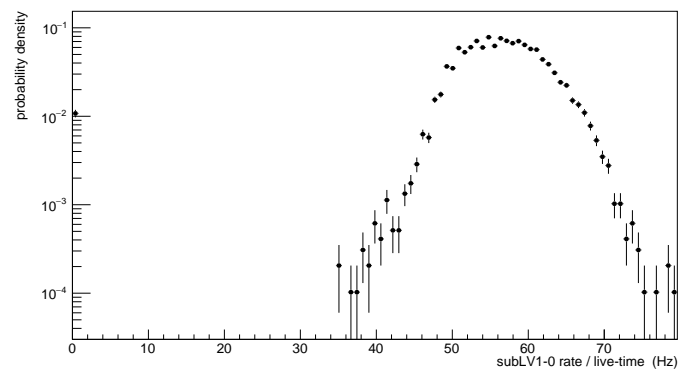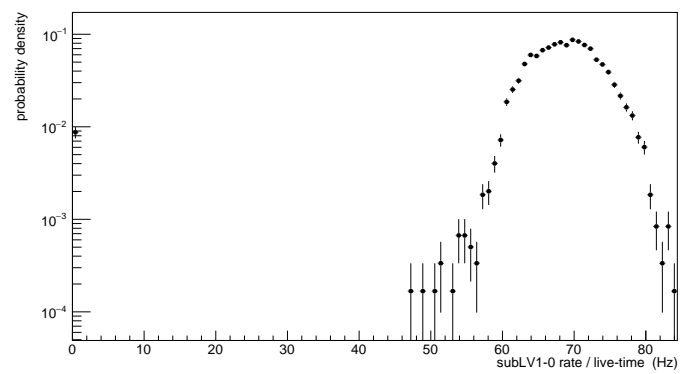

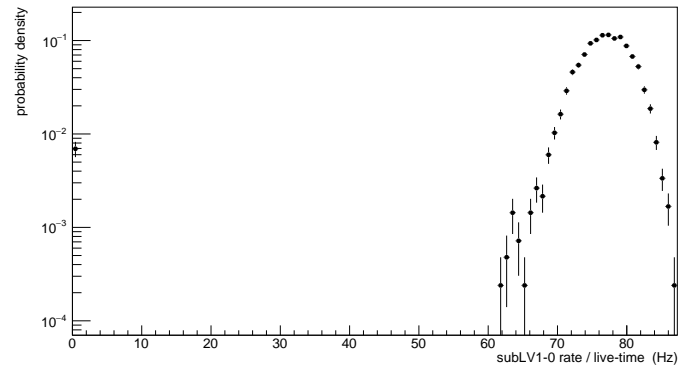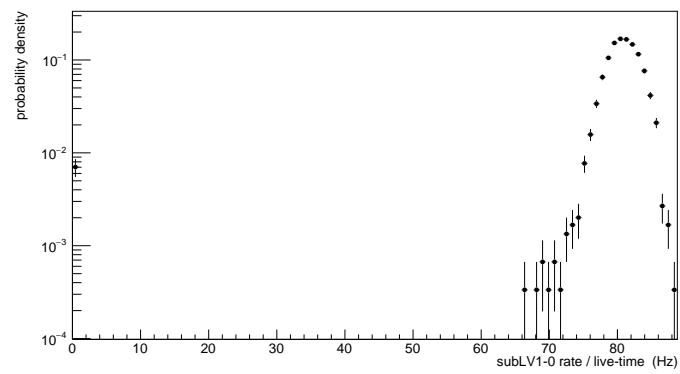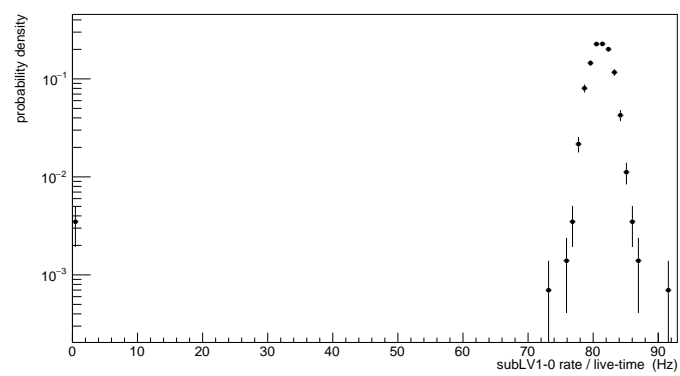

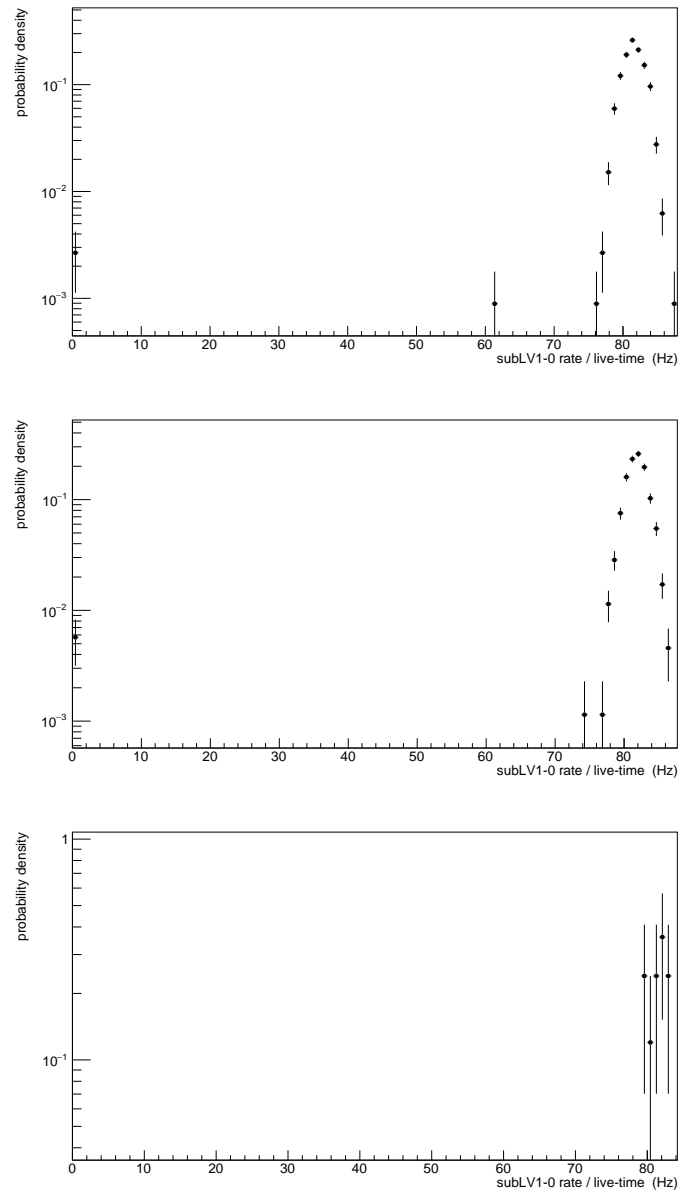

**Figure S7.** Distributions of AMS-02 trigger rate subLV1-0 (corrected by the live-time) of January, 2020. Each panel (a-l) shows the distribution obtained for a specific  $L$  bin; the bins span between  $0.5 R_0$  and  $6.5 R_0$  and are  $0.5 R_0$  wide.

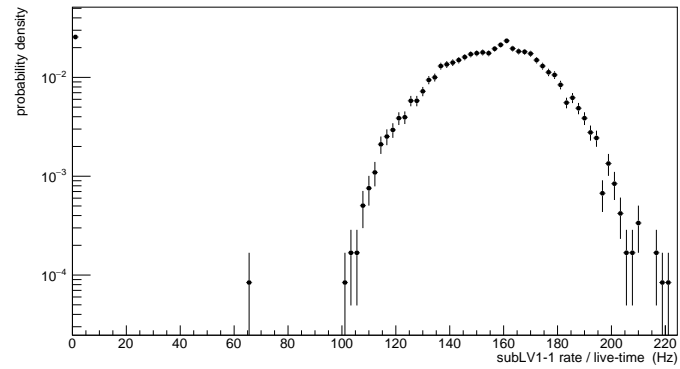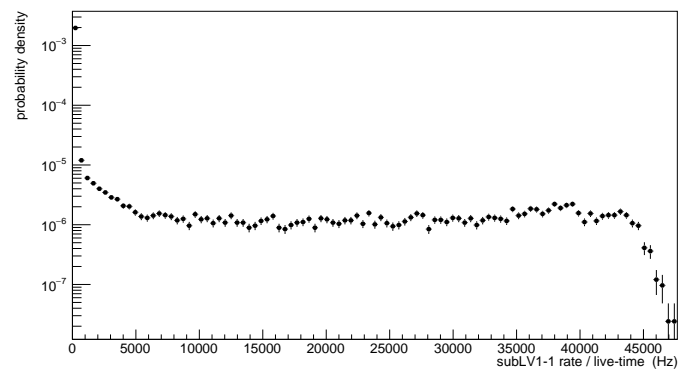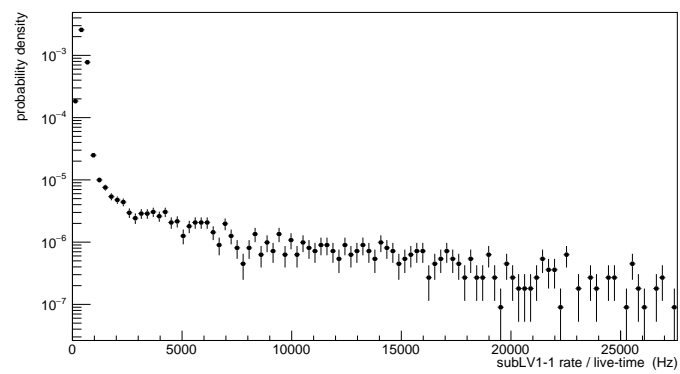

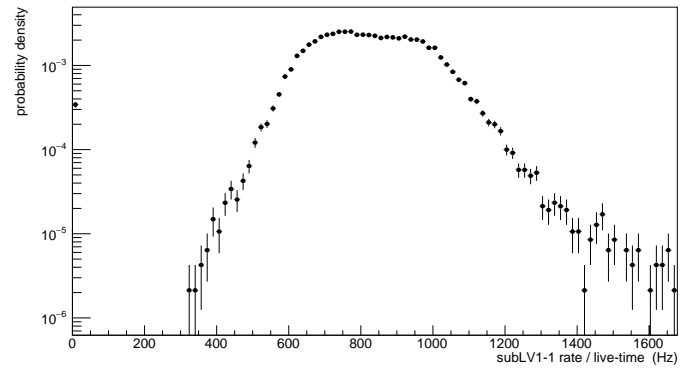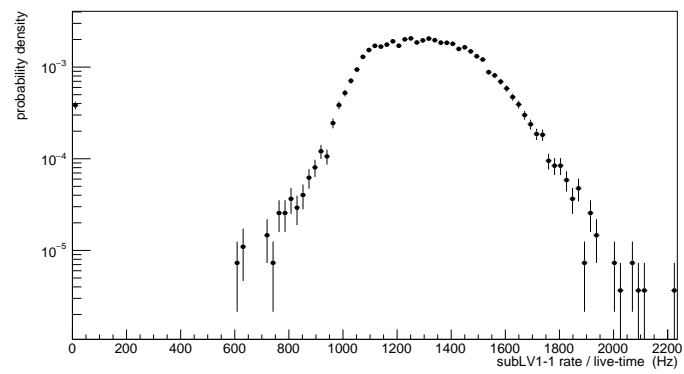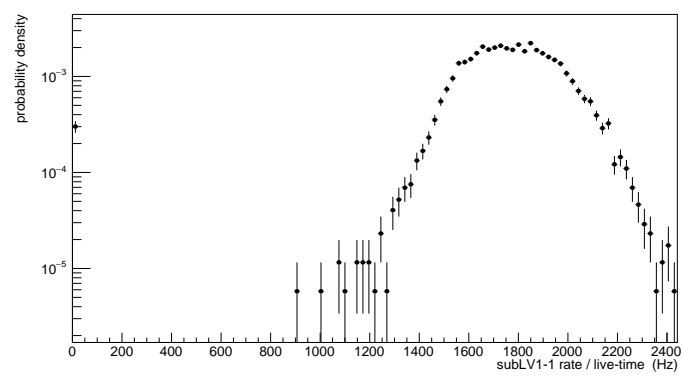

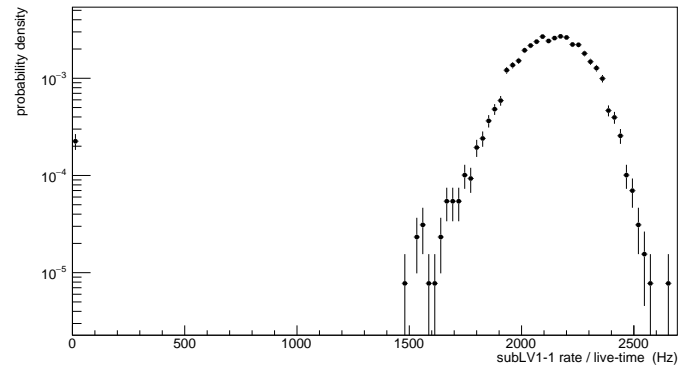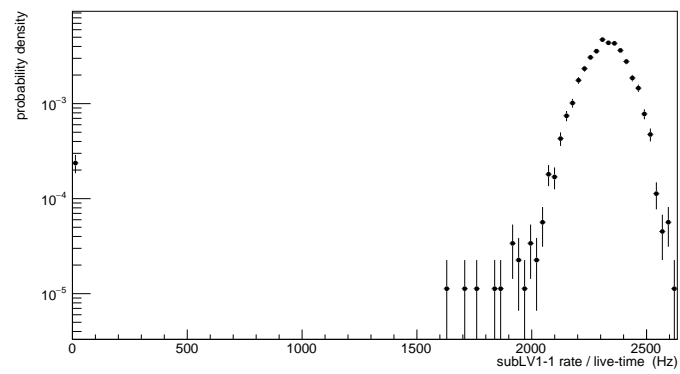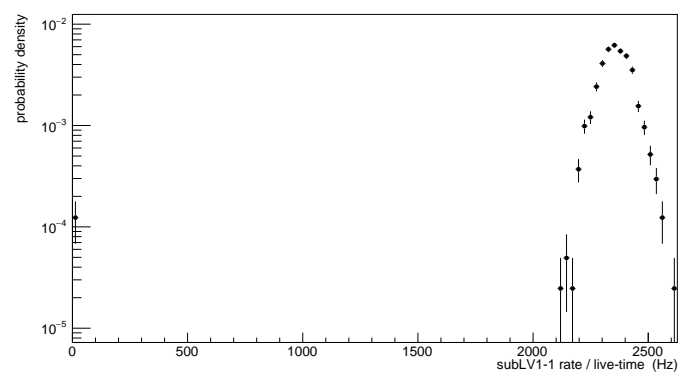

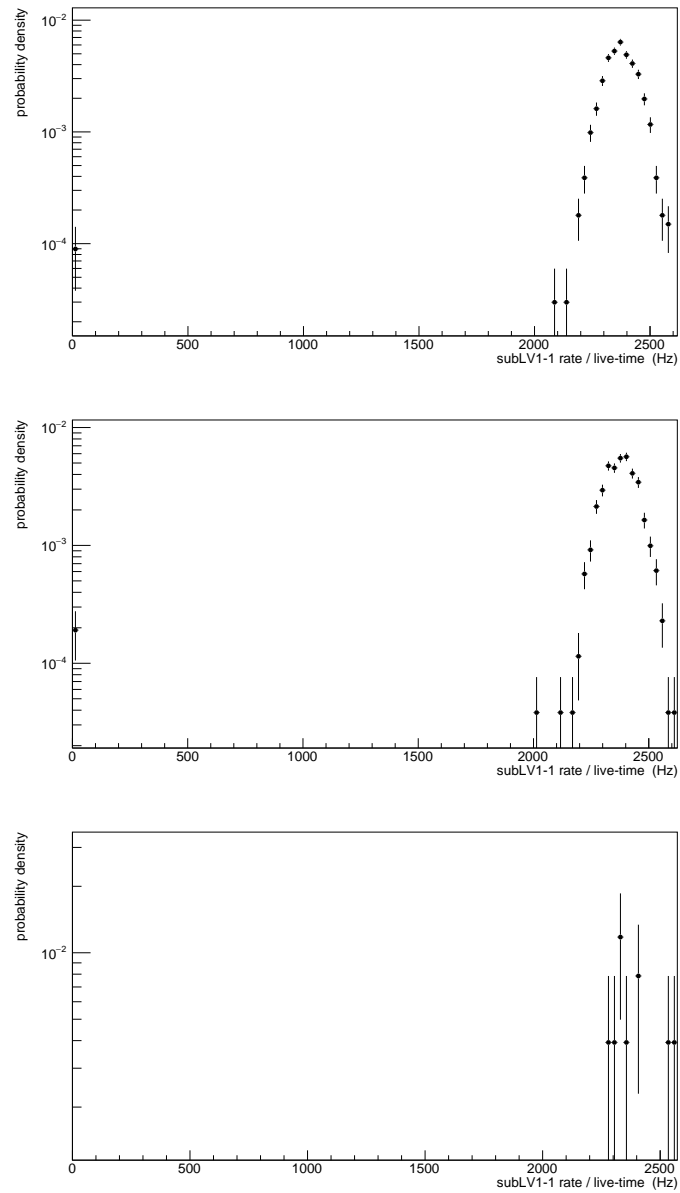

**Figure S8.** Distributions of AMS-02 trigger rate subLV1-1 (corrected by the live-time) of January, 2020. Each panel (a-l) shows the distribution obtained for a specific  $L$  bin; the bins span between  $0.5 R_0$  and  $6.5 R_0$  and are  $0.5 R_0$  wide.



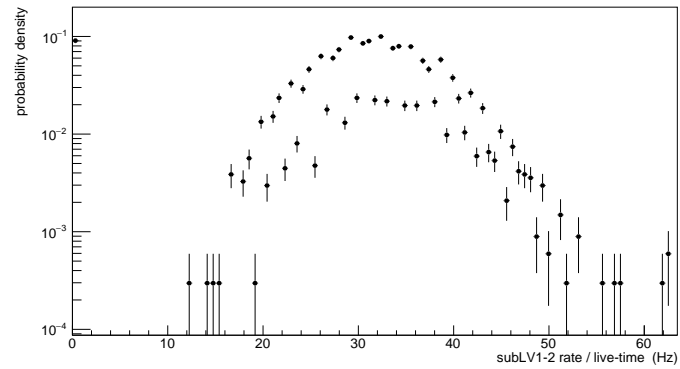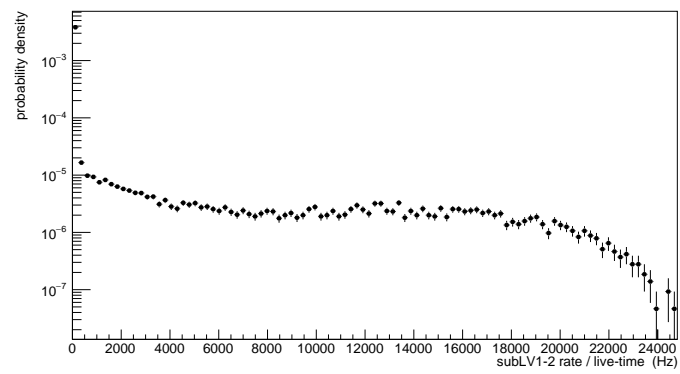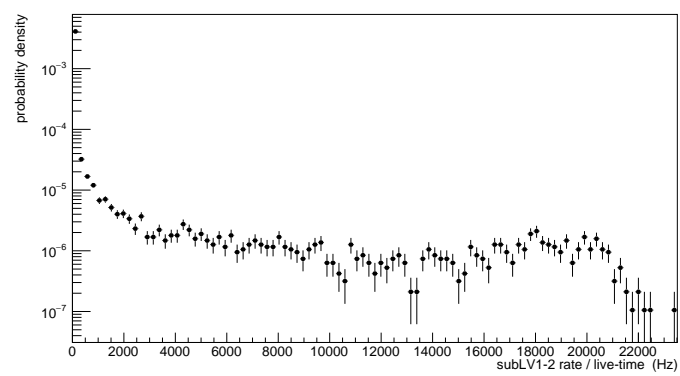

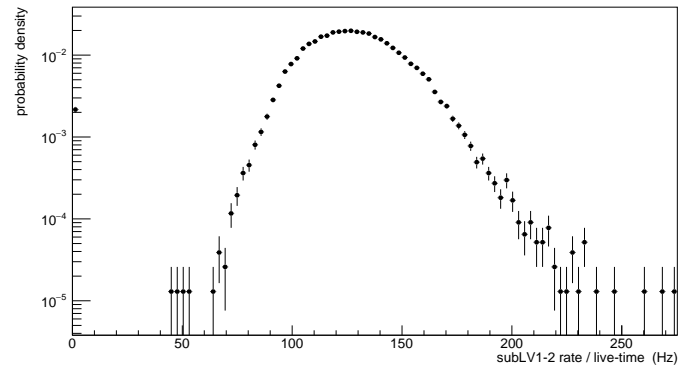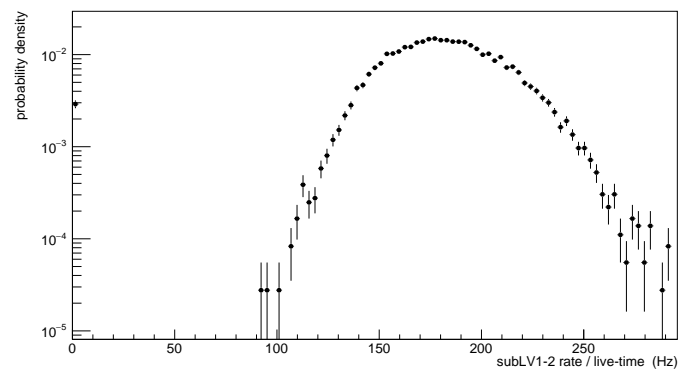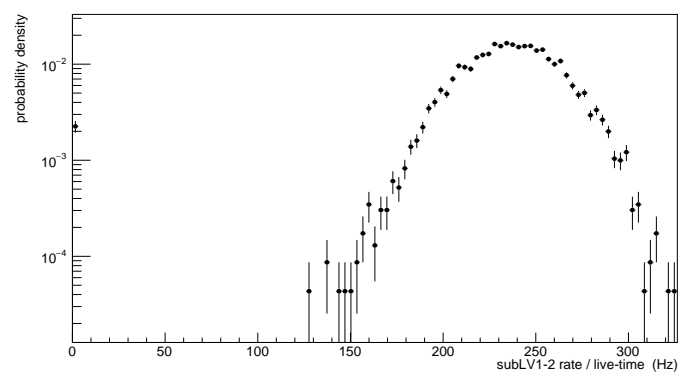

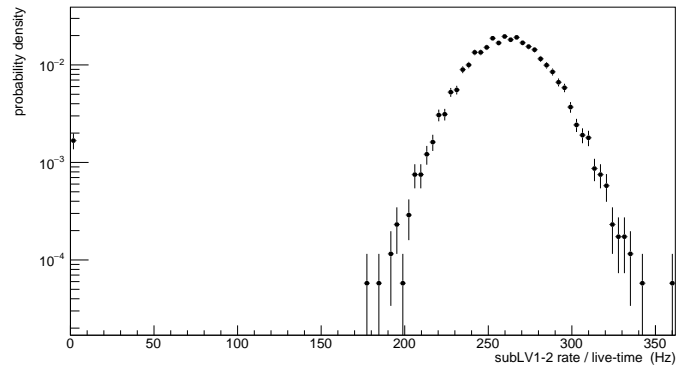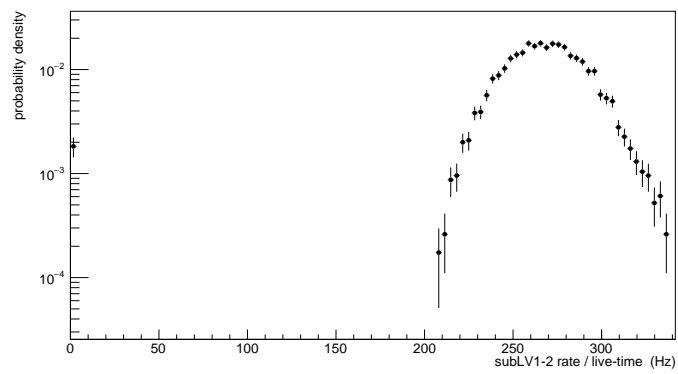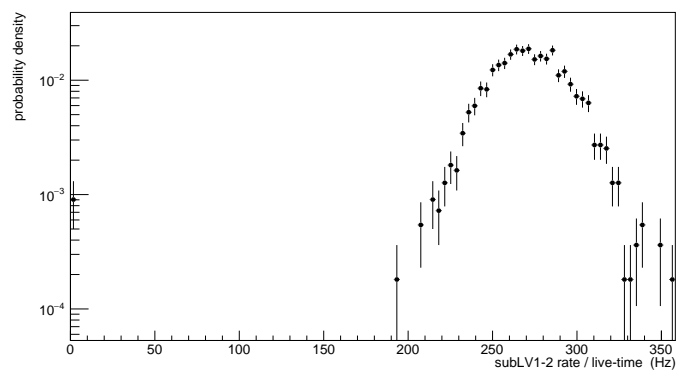

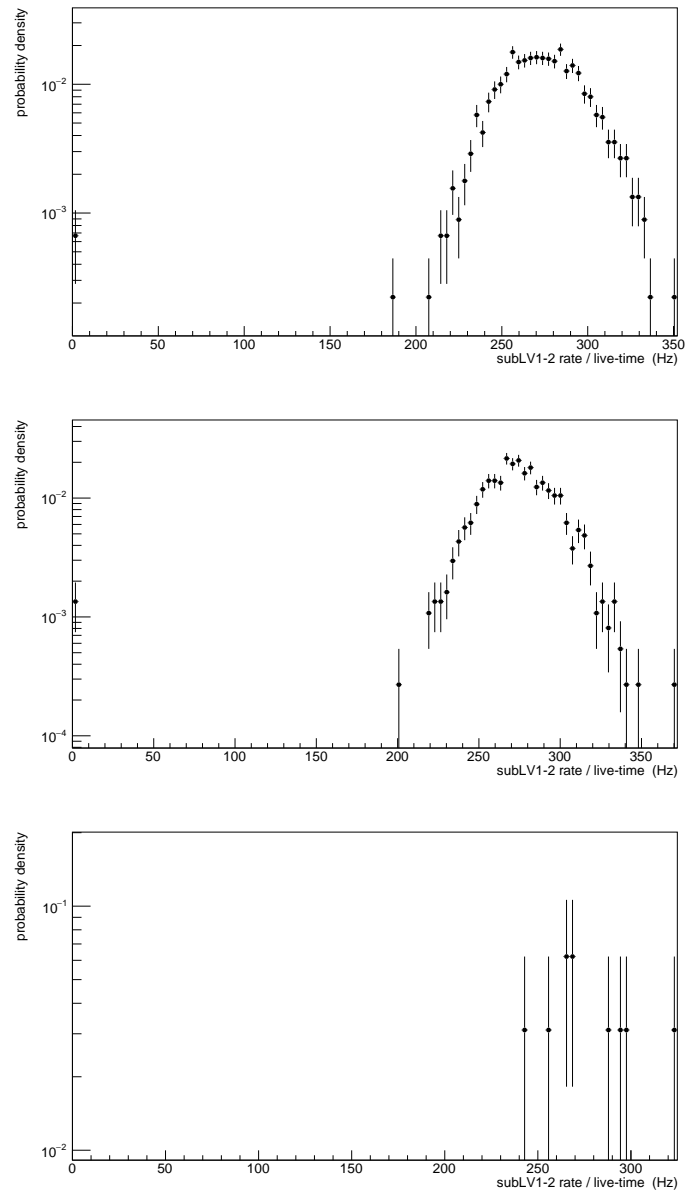

**Figure S9.** Distributions of AMS-02 trigger rate subLV1-2 (corrected by the live-time) of January, 2020. Each panel (a-l) shows the distribution obtained for a specific  $L$  bin; the bins span between  $0.5 R_0$  and  $6.5 R_0$  and are  $0.5 R_0$  wide.

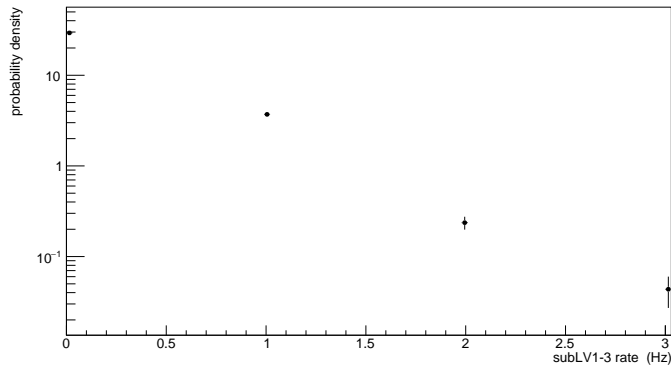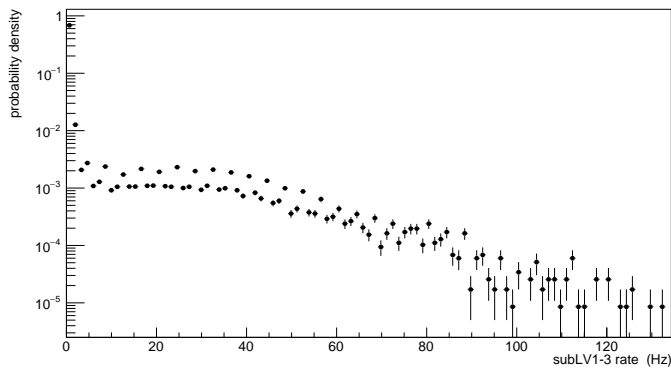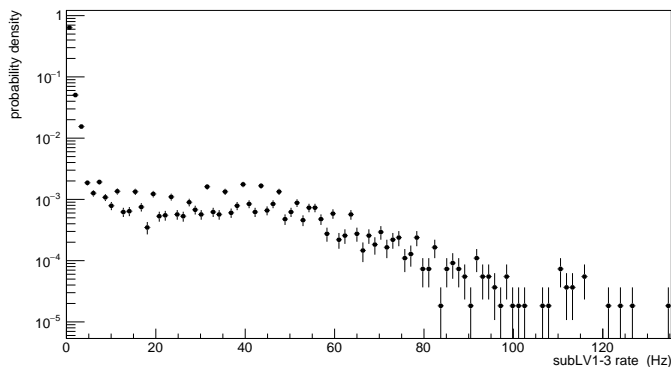

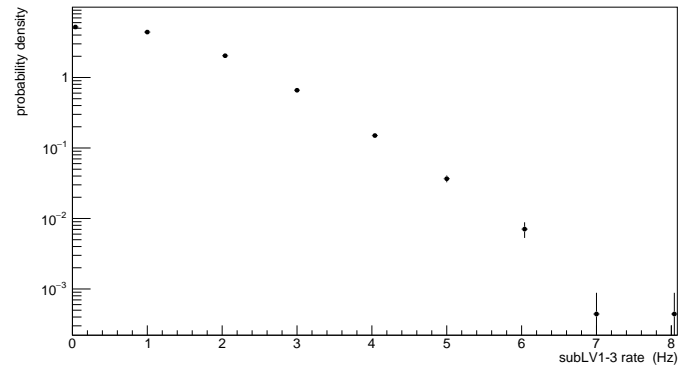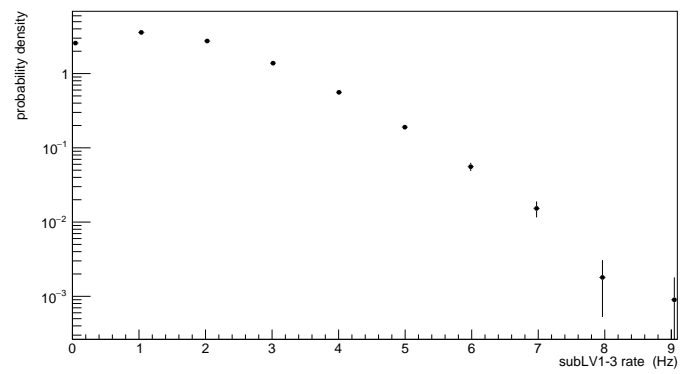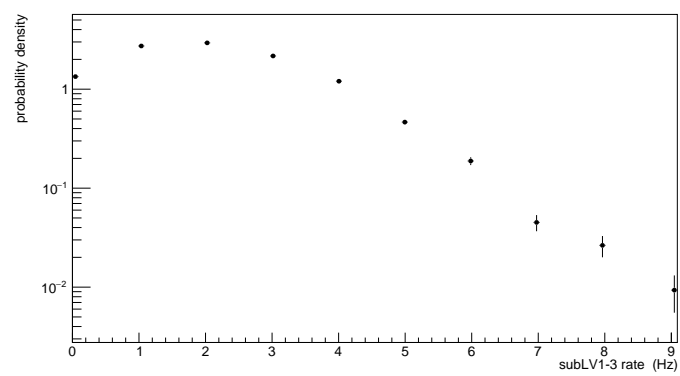

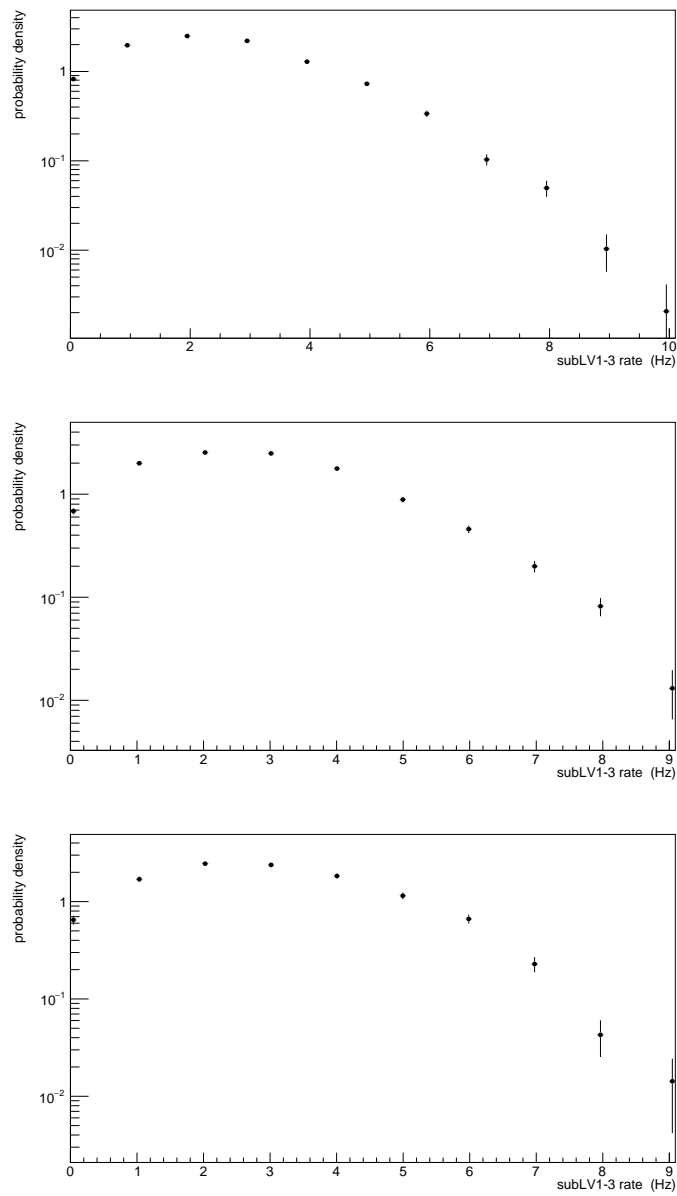

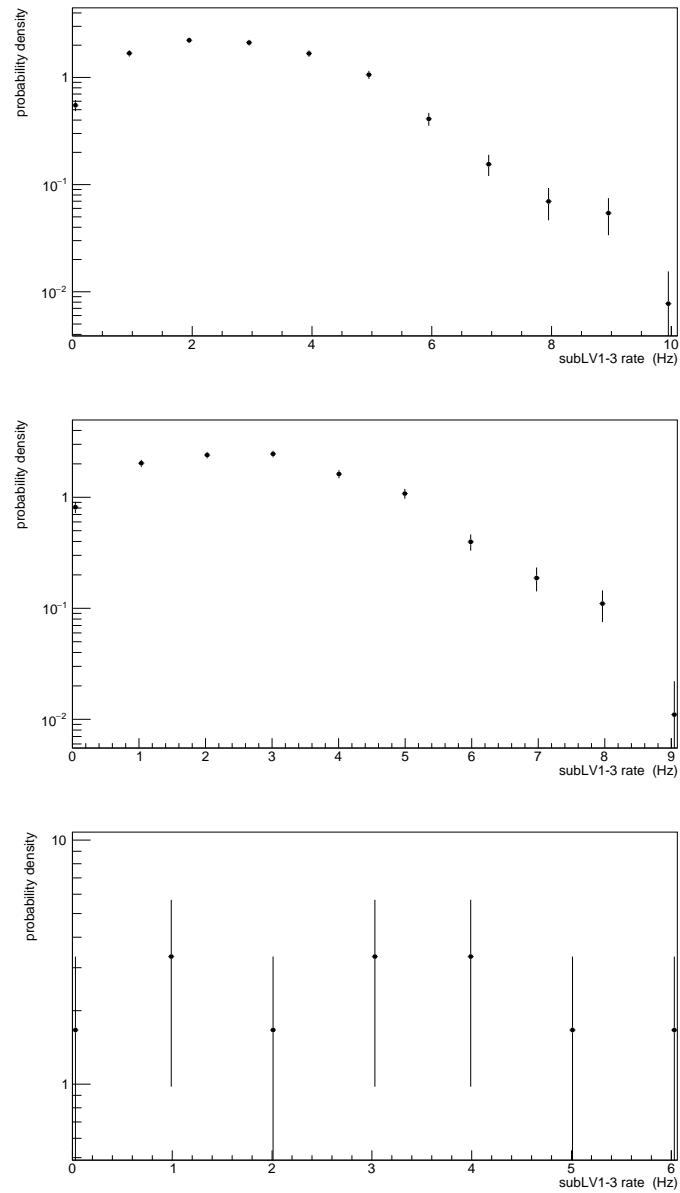

**Figure S10.** Distributions of AMS-02 trigger rate subLV1-3 (raw) of January, 2020. Each panel (a-l) shows the distribution obtained for a specific  $L$  bin; the bins span between  $0.5 R_0$  and  $6.5 R_0$  and are  $0.5 R_0$  wide.



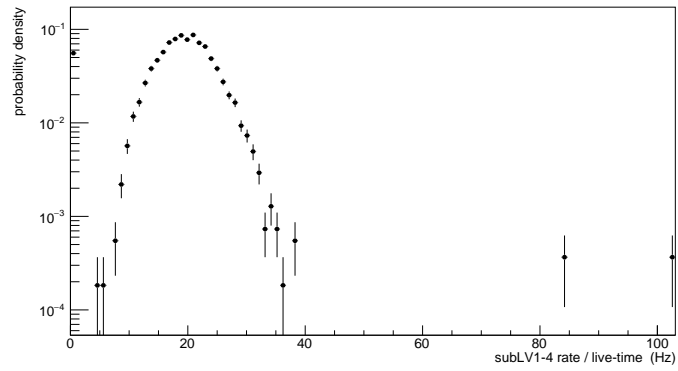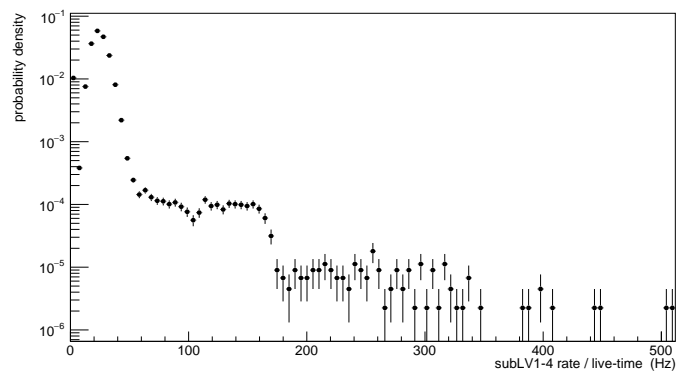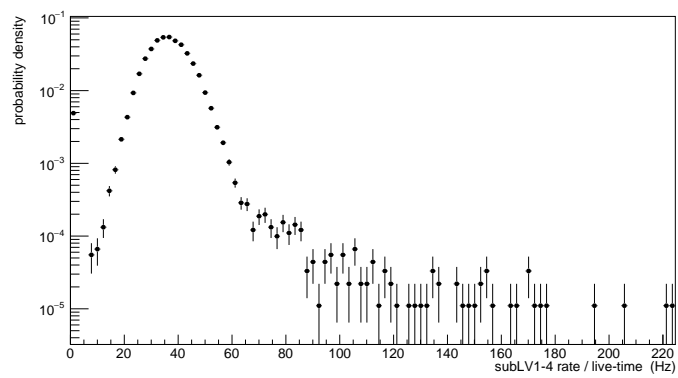

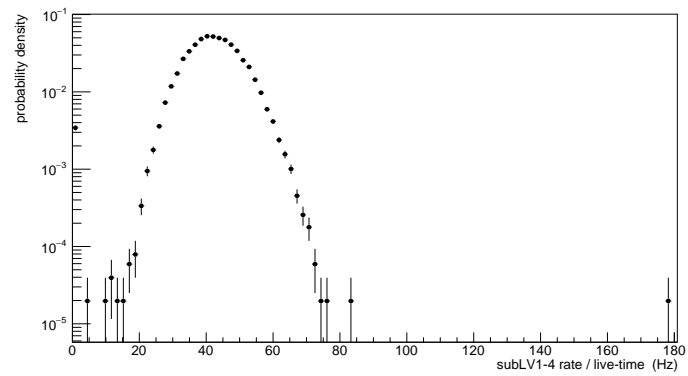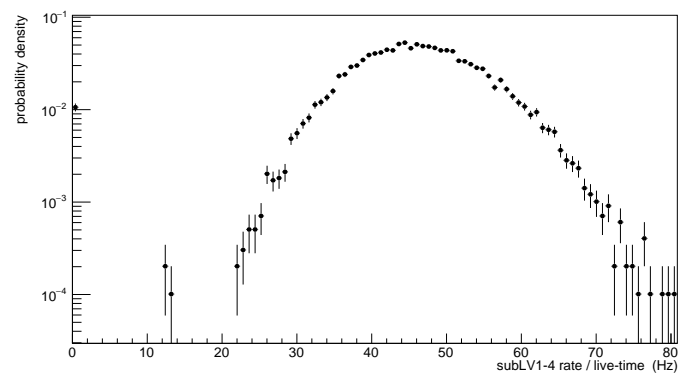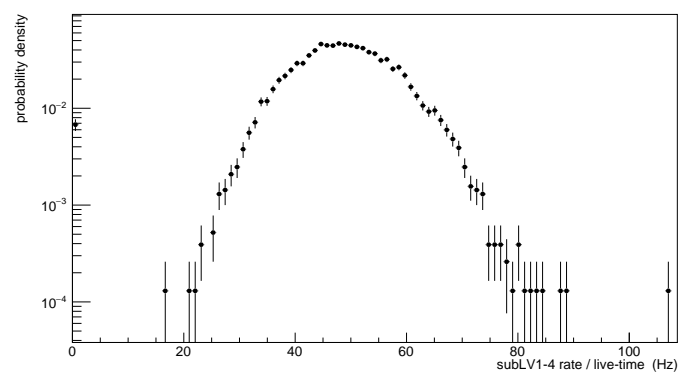

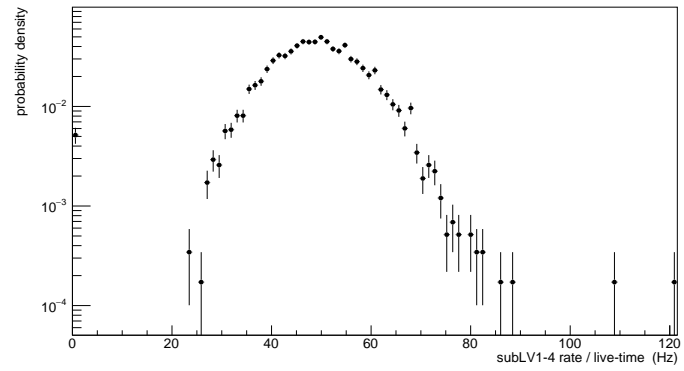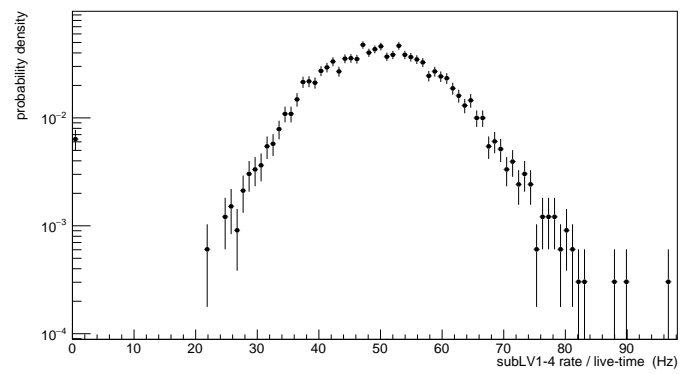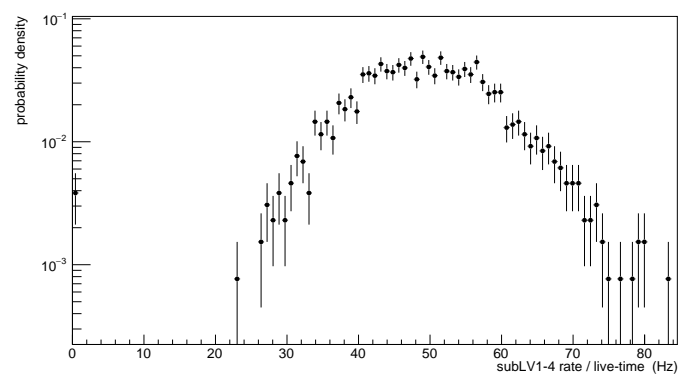

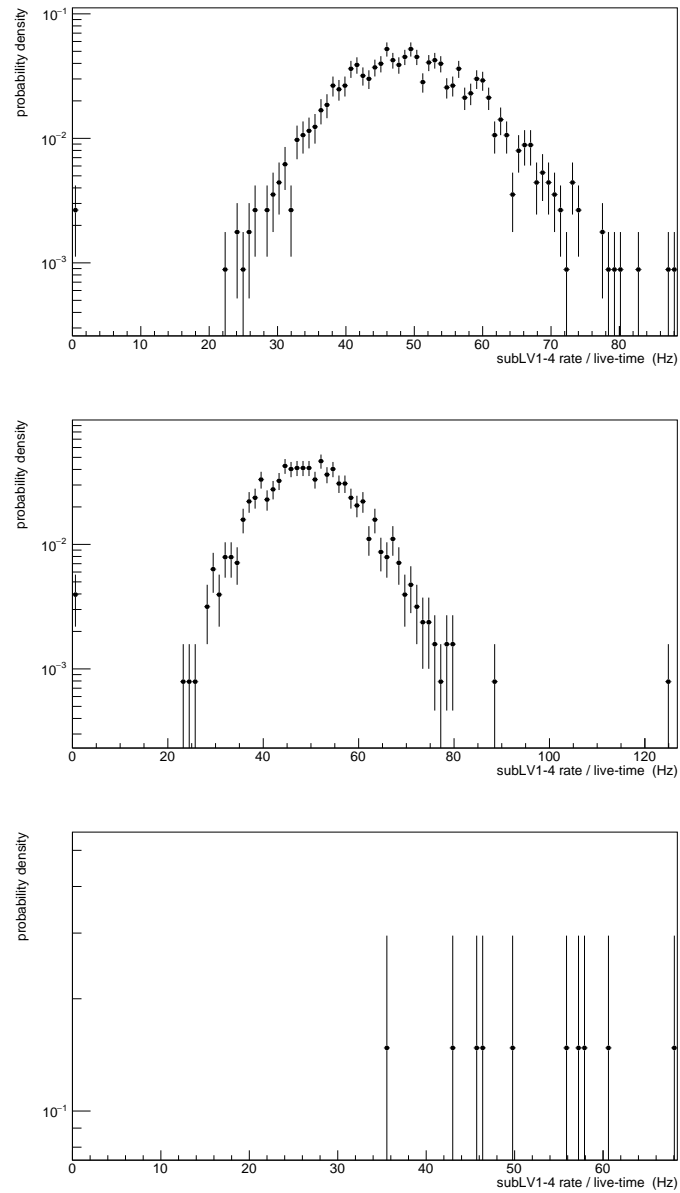

**Figure S11.** Distributions of AMS-02 trigger rate subLV1-4 (corrected by the live-time) of January, 2020. Each panel (a–l) shows the distribution obtained for a specific  $L$  bin; the bins span between  $0.5 R_0$  and  $6.5 R_0$  and are  $0.5 R_0$  wide.

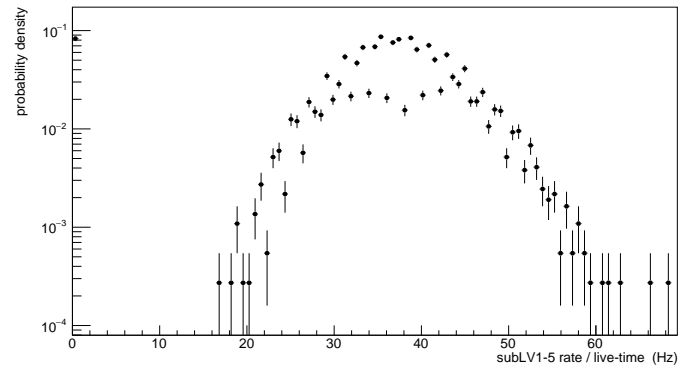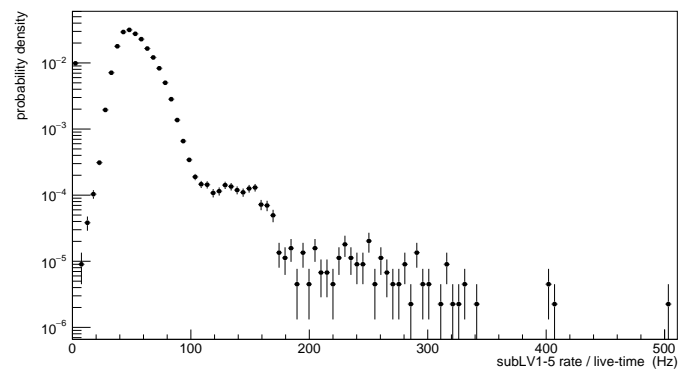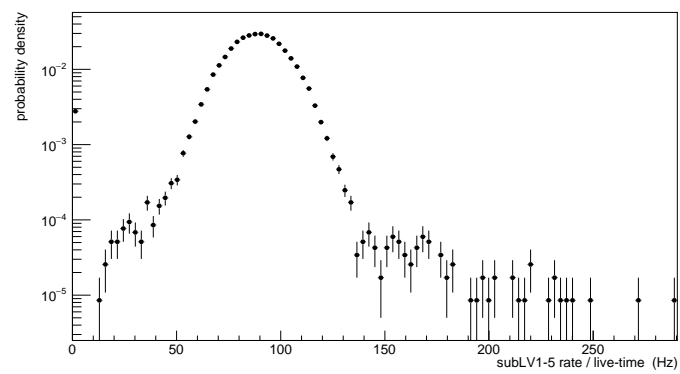

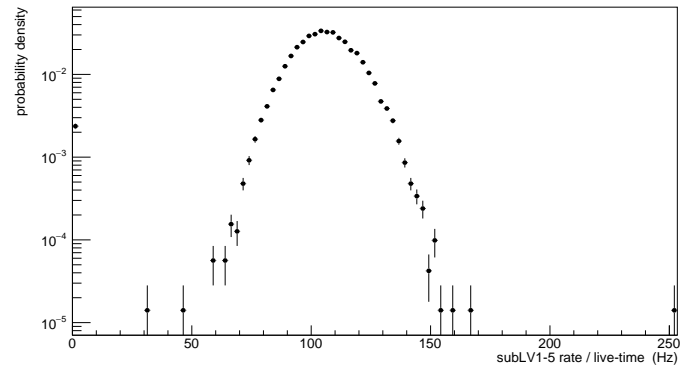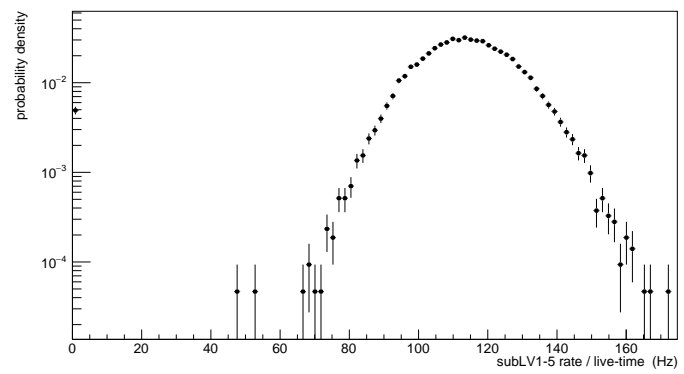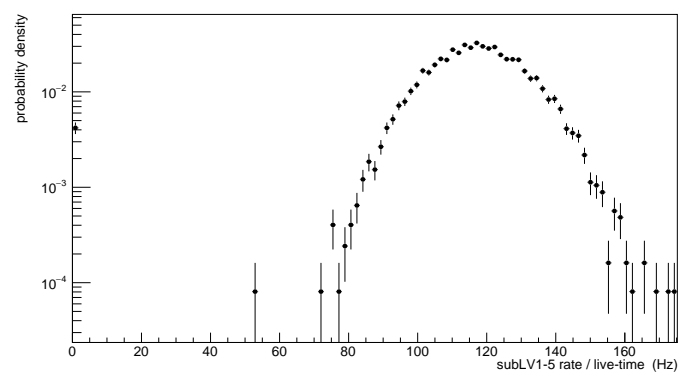

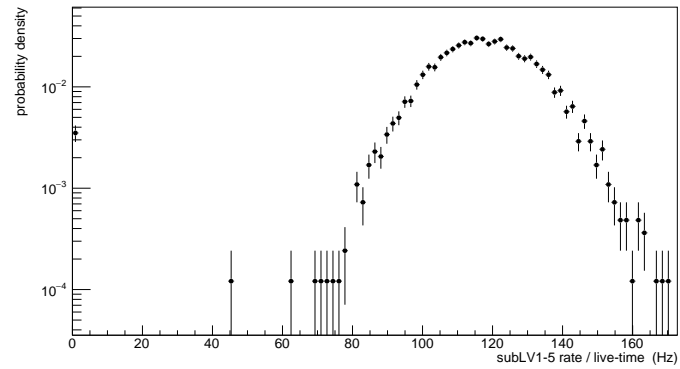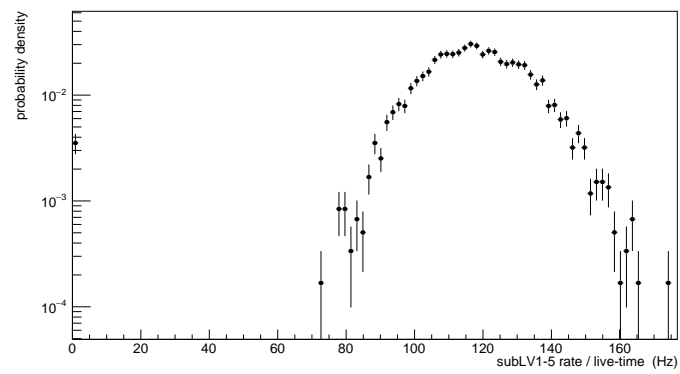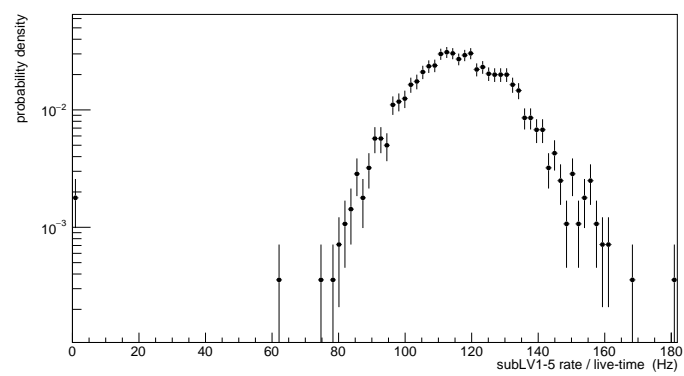

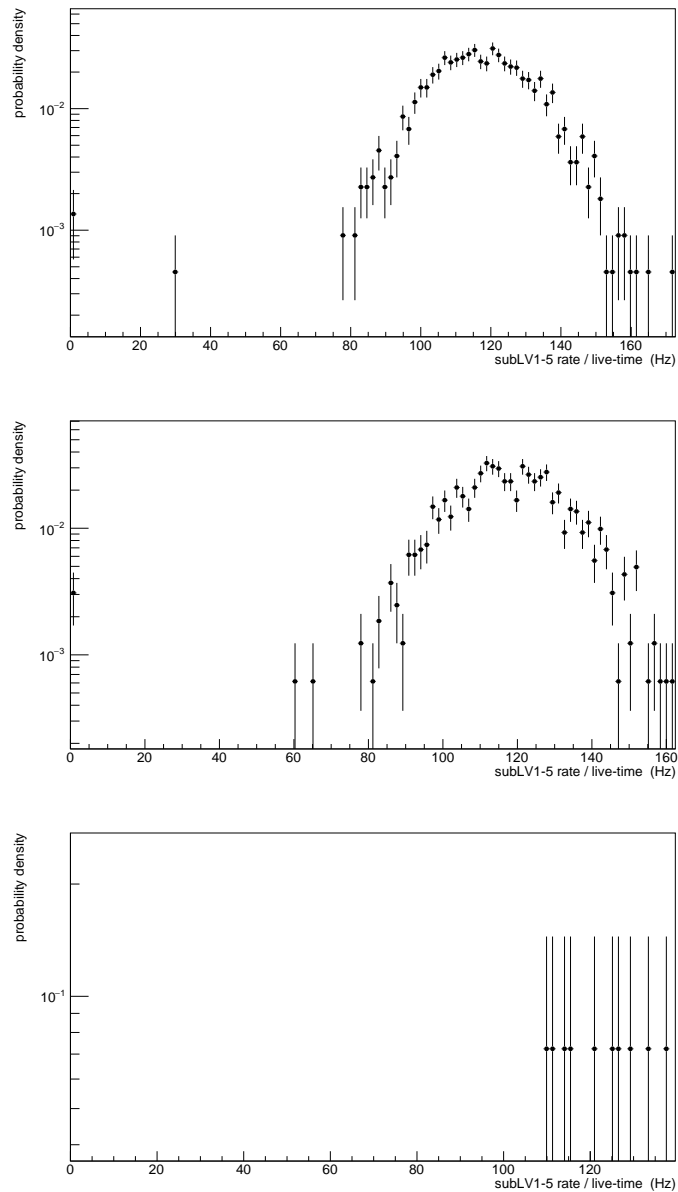

**Figure S12.** Distributions of AMS-02 trigger rate subLV1-5 (corrected by the live-time) of January, 2020. Each panel (a-l) shows the distribution obtained for a specific  $L$  bin; the bins span between  $0.5 R_0$  and  $6.5 R_0$  and are  $0.5 R_0$  wide.

### Abbreviations

The following abbreviations are used in this manuscript:

|     |                             |
|-----|-----------------------------|
| AMS | Alpha Magnetic Spectrometer |
| FT  | fast trigger                |
| FTC | fast trigger charged        |
| FTE | fast trigger ECAL           |
| FTZ | fast trigger big-Z          |
| LV1 | level 1                     |

1

2

3

4



**Disclaimer/Publisher's Note:** The statements, opinions and data contained in all publications are solely those of the individual author(s) and contributor(s) and not of MDPI and/or the editor(s). MDPI and/or the editor(s) disclaim responsibility for any injury to people or property resulting from any ideas, methods, instructions or products referred to in the content.
