# Supplementary figures and images for: Real-Time Monitoring of Solar Energetic Particles Using the Alpha Magnetic Spectrometer on the International Space Station (part 1 of 2)
Source: MDPI journal article supplement (doi:10.3390/instruments7040038), 2023-10-31

probability density

$10^{-3}$

$10^{-4}$

$10^{-5}$

0

500

1000

1500

2000

2500

LV1 rate / live-time (Hz)

3000

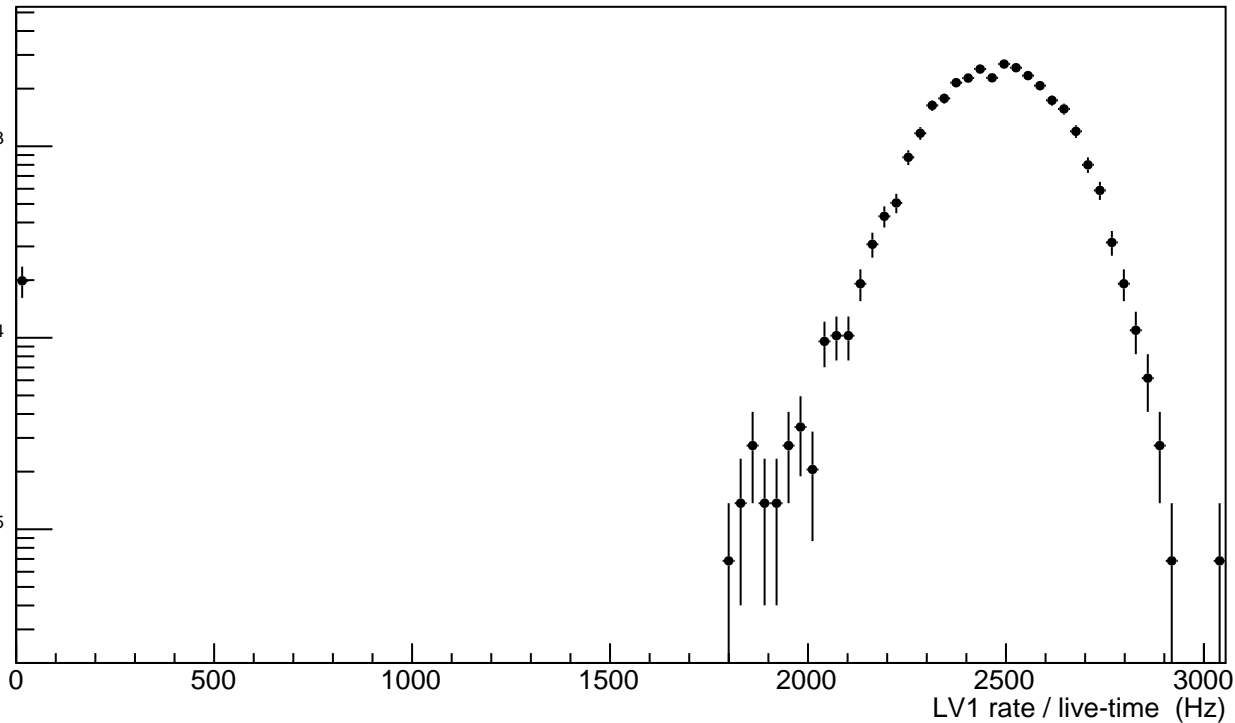

Supplement: s1 [file s1]

probability density

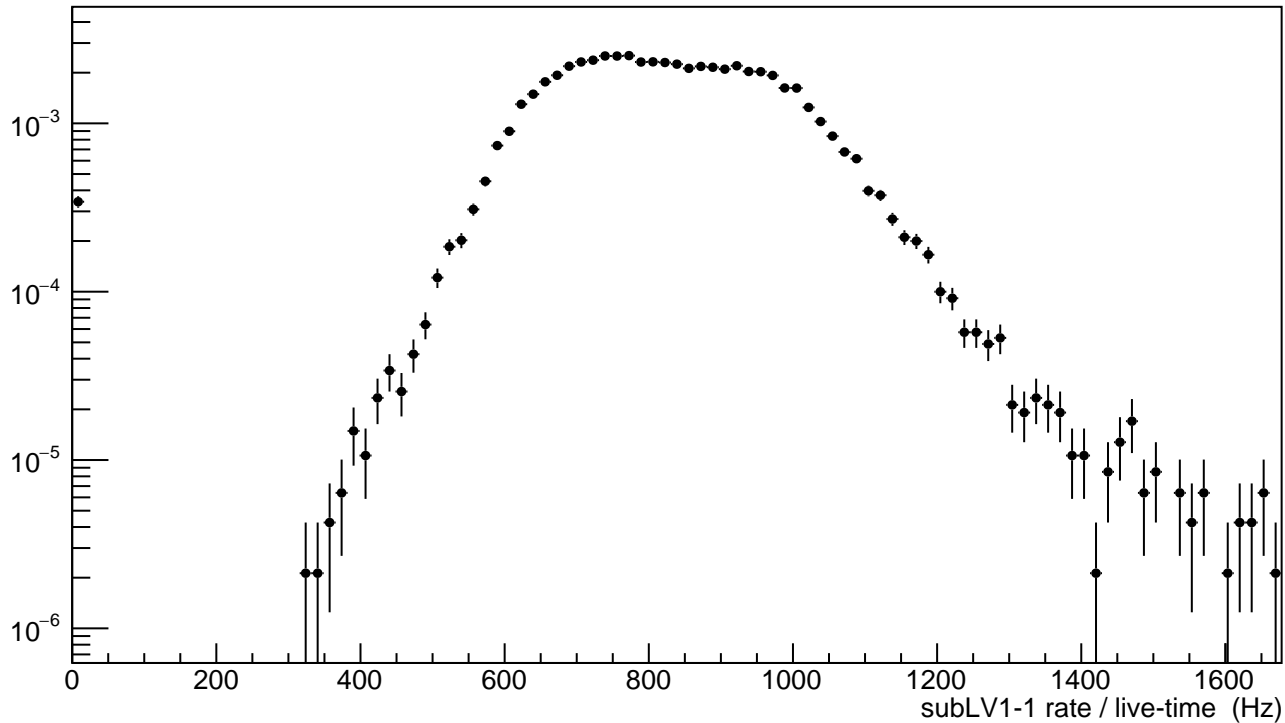

Supplement: s1 [file s1]

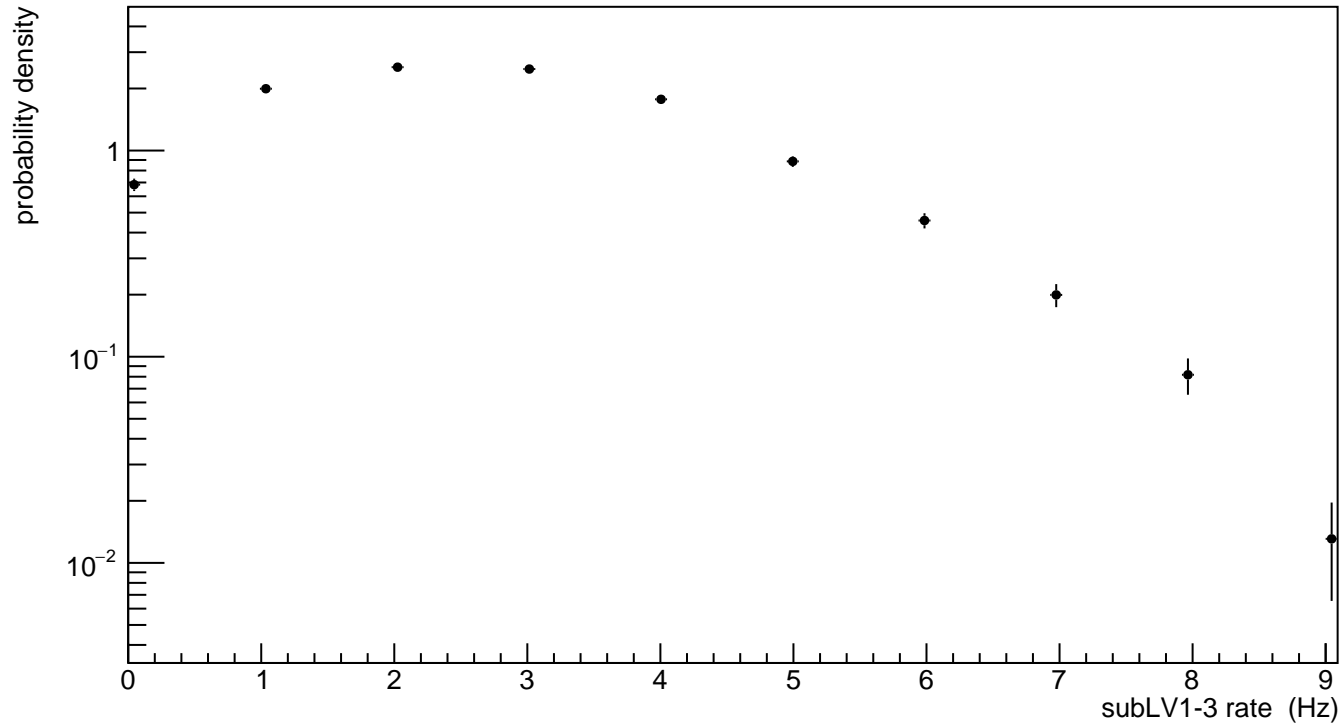

Supplement: s1 [file s1]

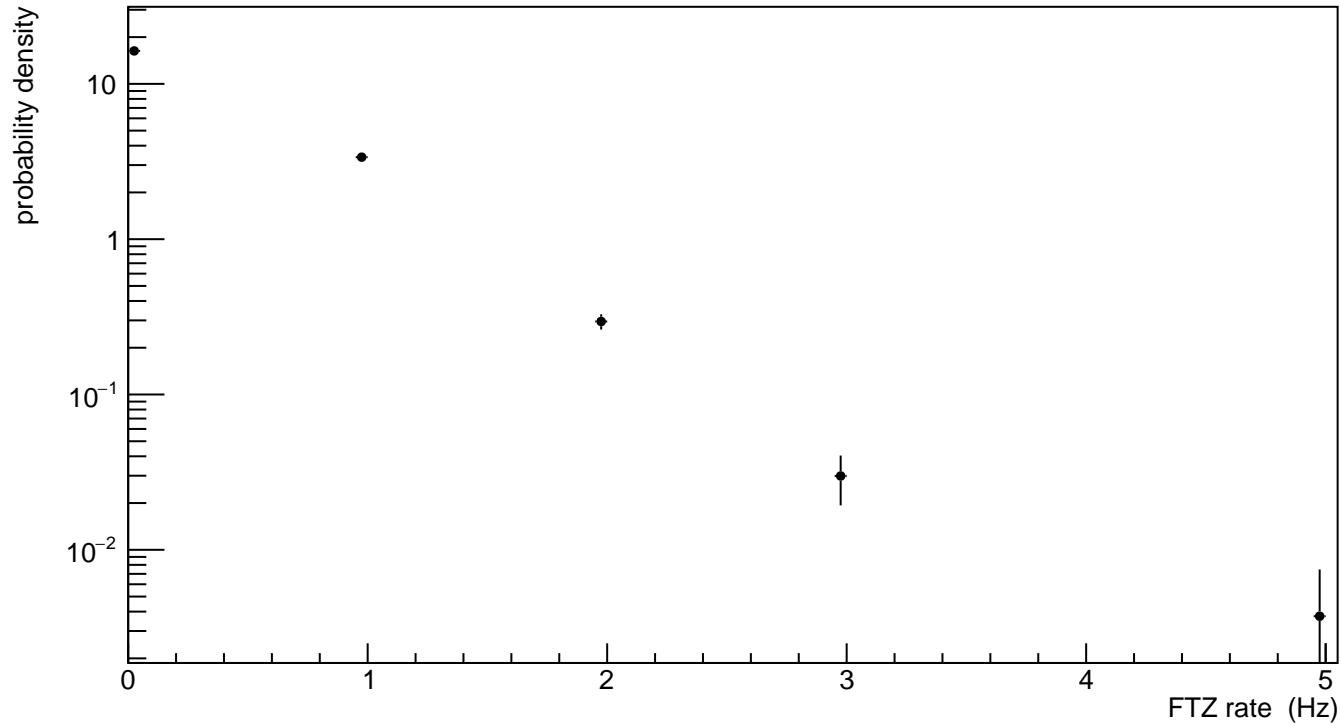

Supplement: s1 [file s1]

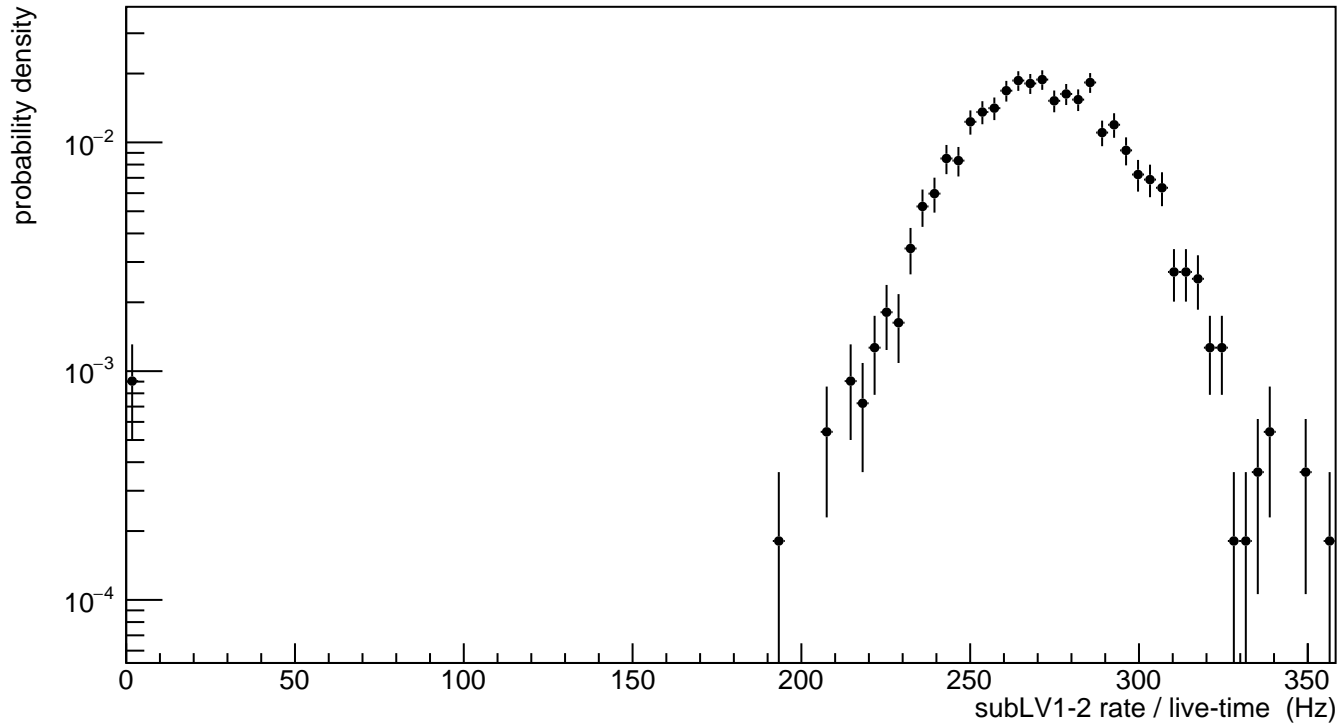

Supplement: s1 [file s1]

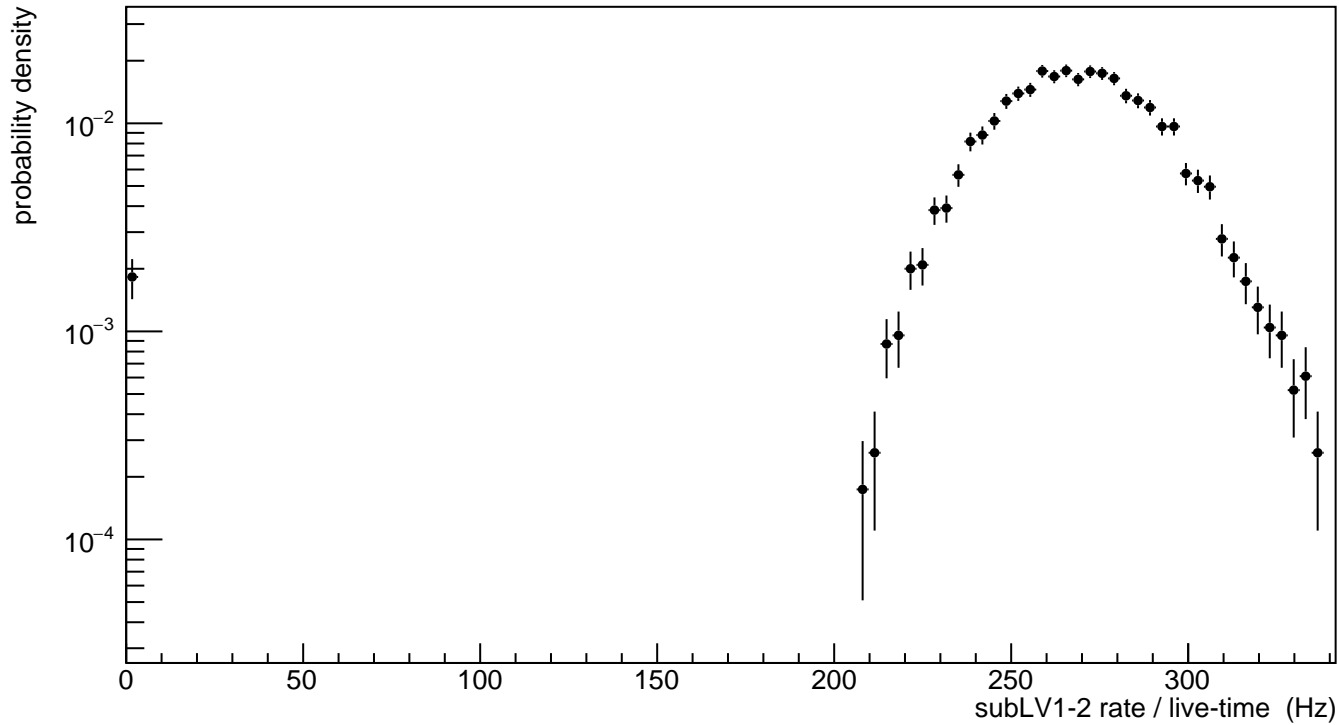

Supplement: s1 [file s1]

probability density

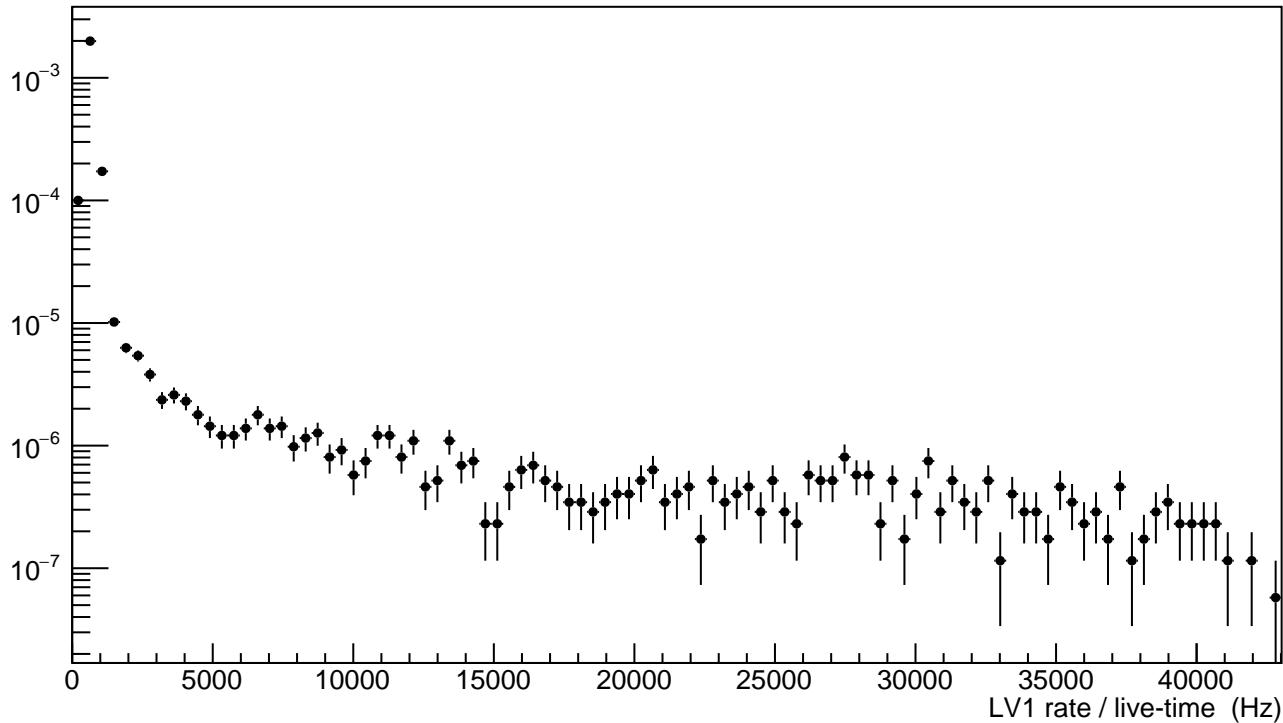

Supplement: s1 [file s1]

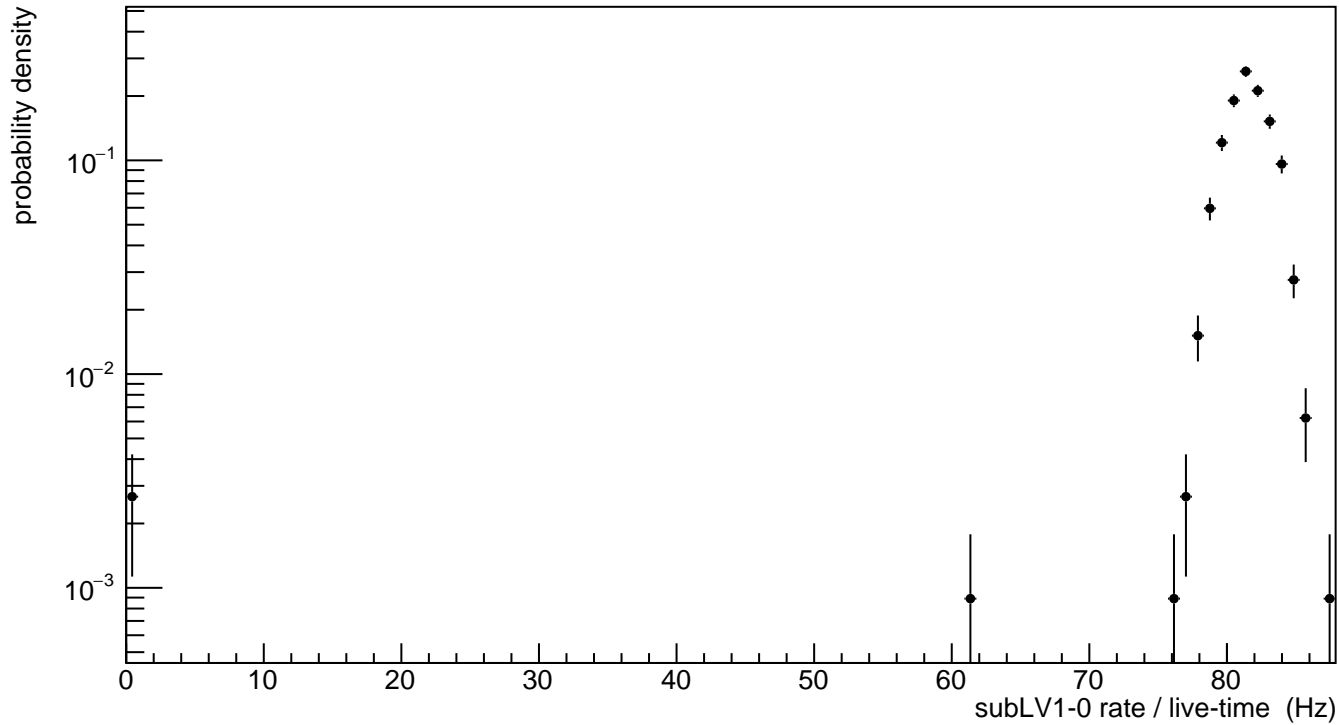

Supplement: s1 [file s1]

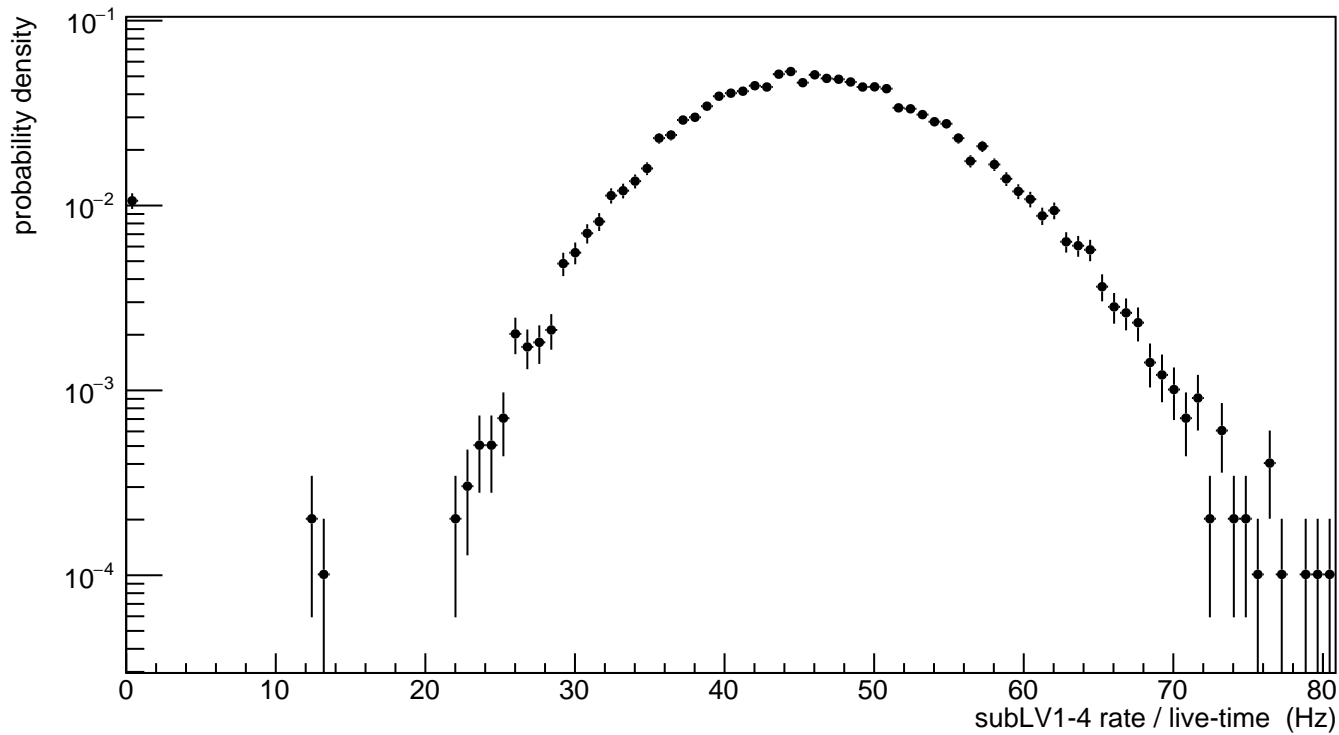

Supplement: s1 [file s1]

probability density

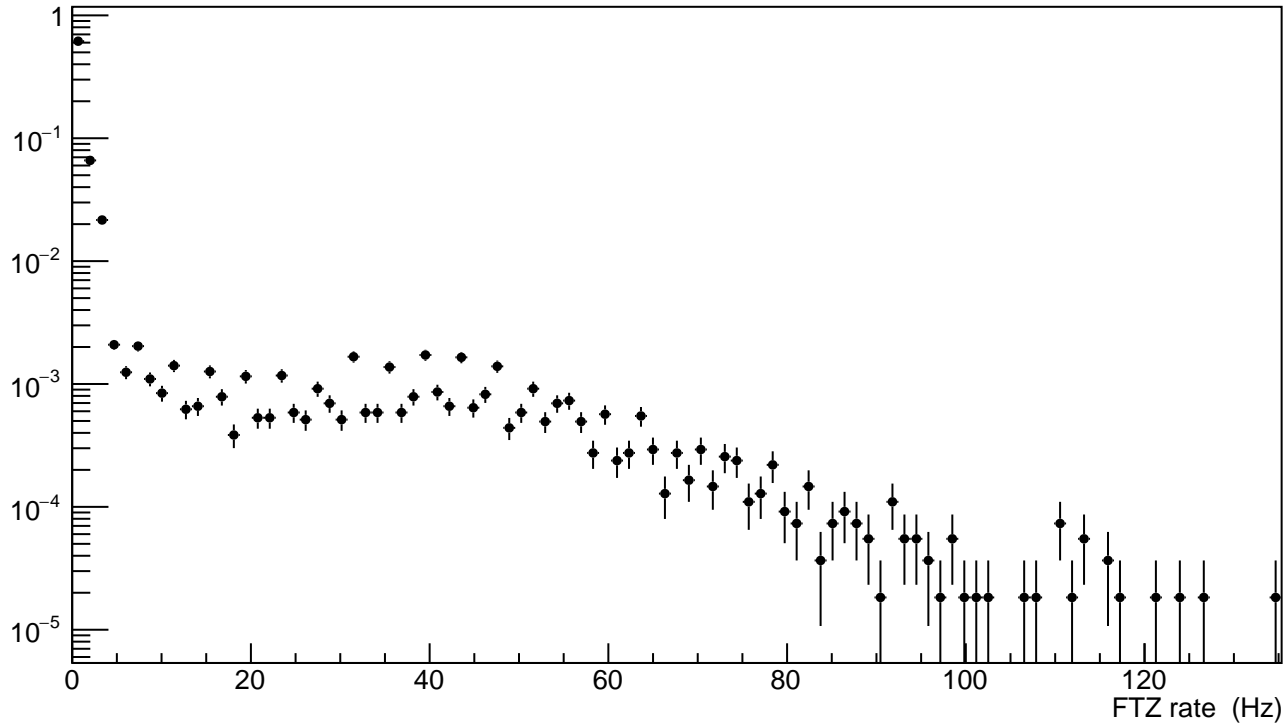

Supplement: s1 [file s1]

probability density

$10^{-2}$

$10^{-3}$

$10^{-4}$

0

50

100

150

200

250

300

350

subLV1-2 rate / live-time (Hz)

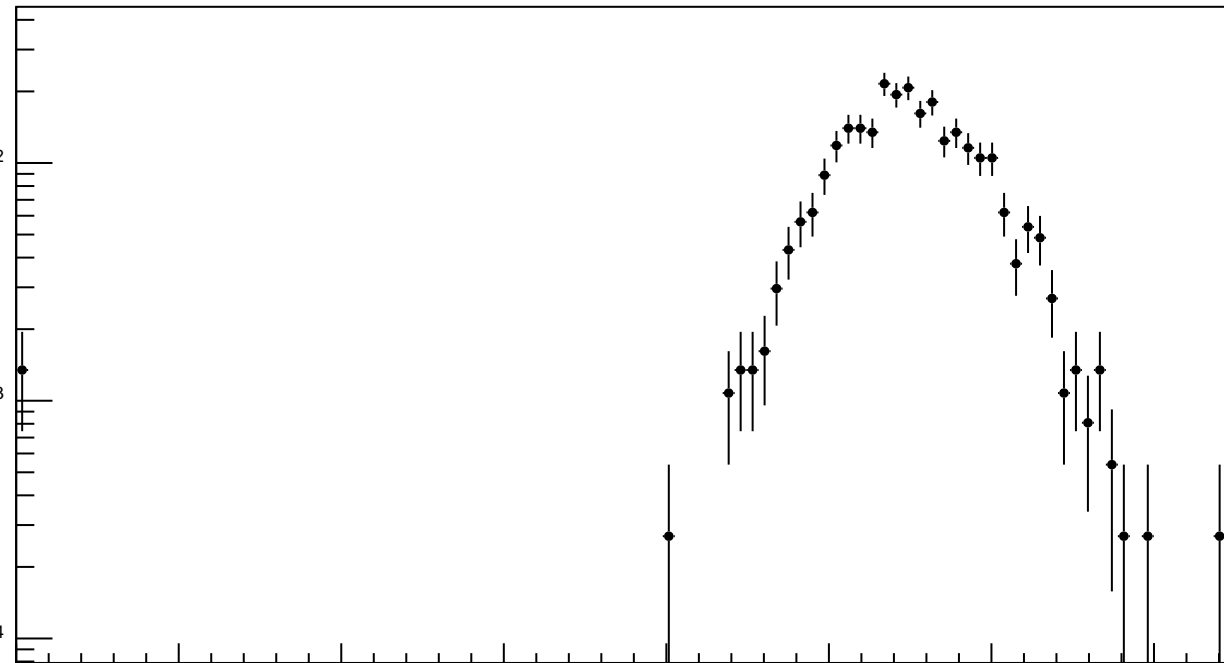

Supplement: s1 [file s1]

probability density

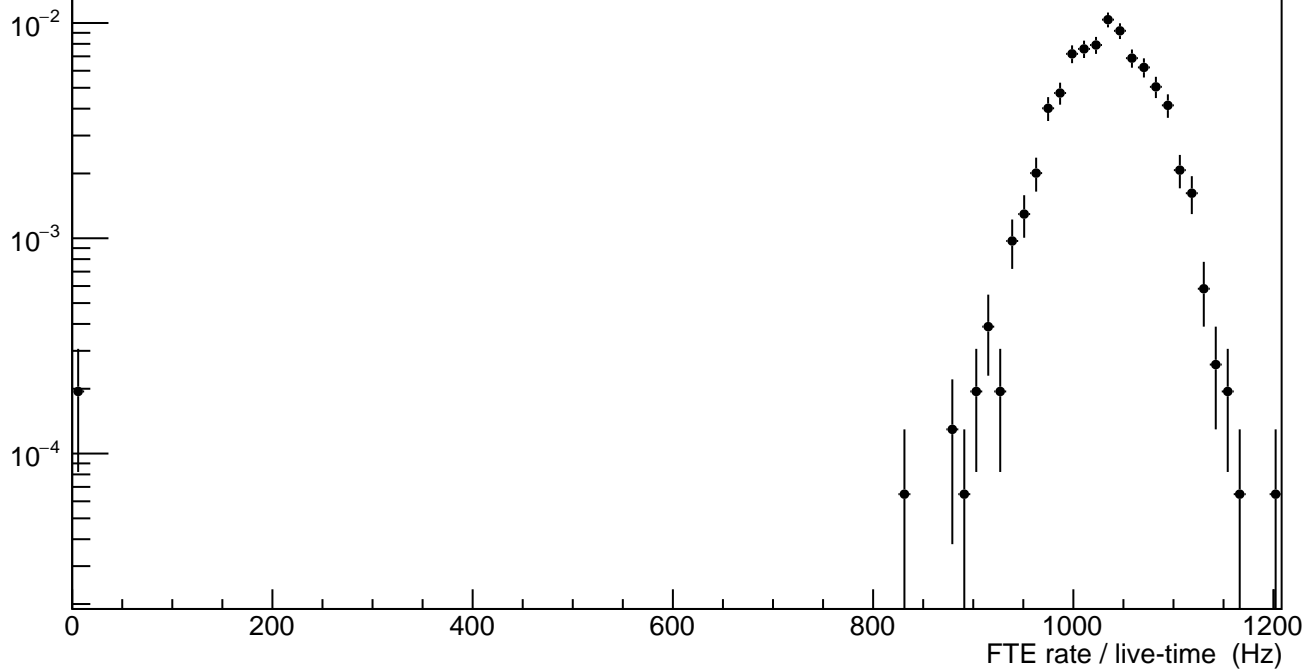

Supplement: s1 [file s1]

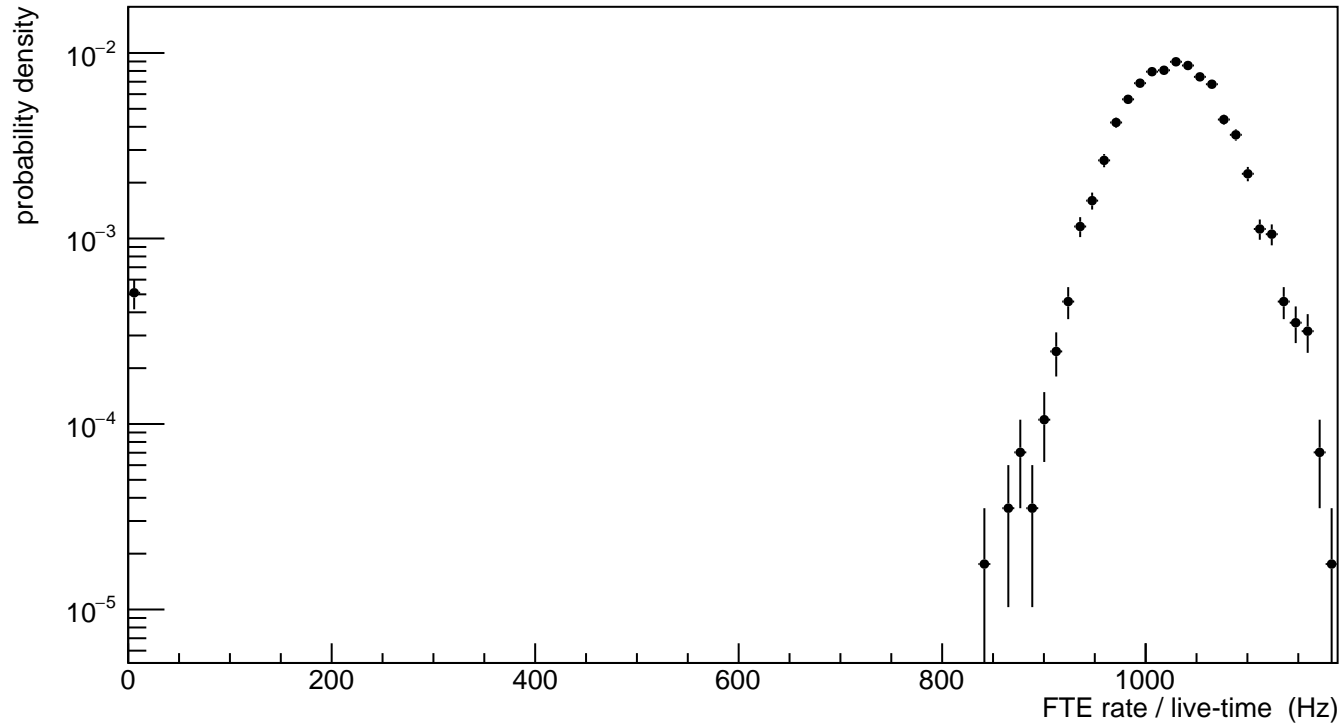

Supplement: s1 [file s1]

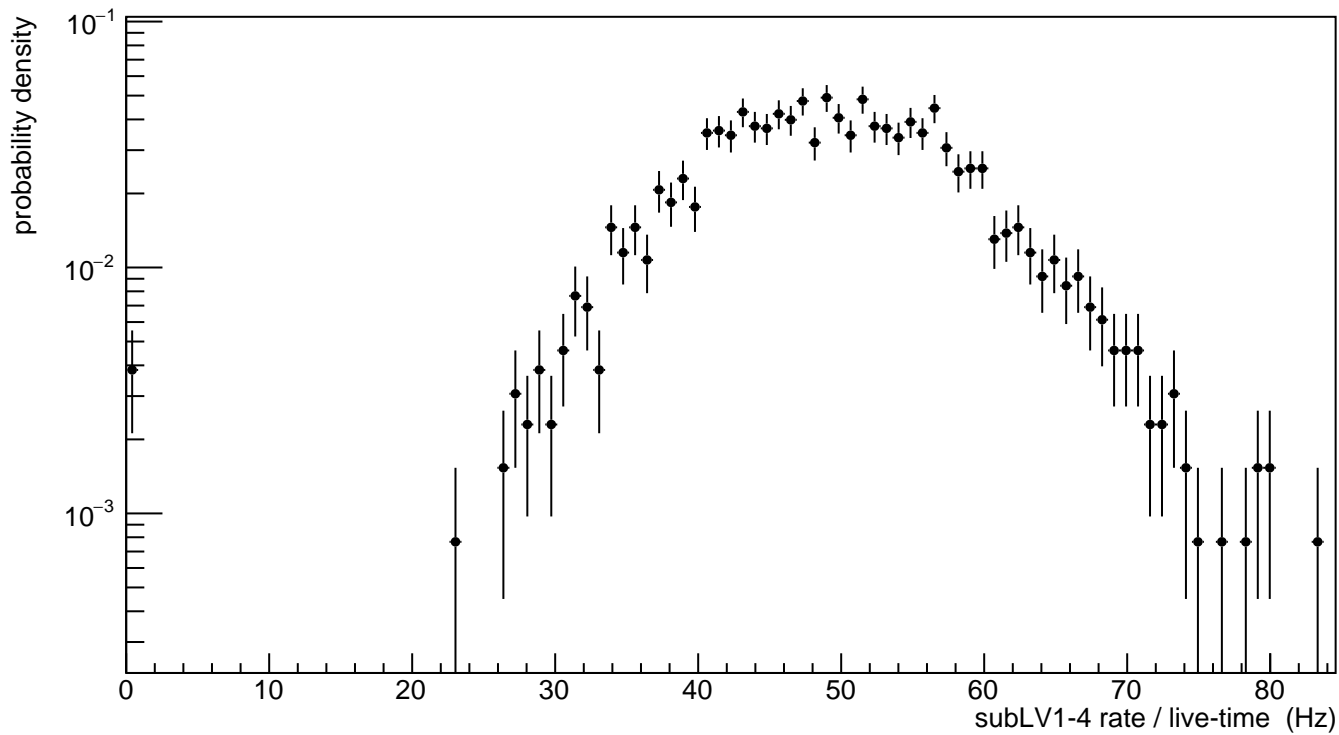

Supplement: s1 [file s1]

probability density

$10^{-2}$

$10^{-3}$

$10^{-4}$

0

50

100

150

200

250

300

350

subLV1-2 rate / live-time (Hz)

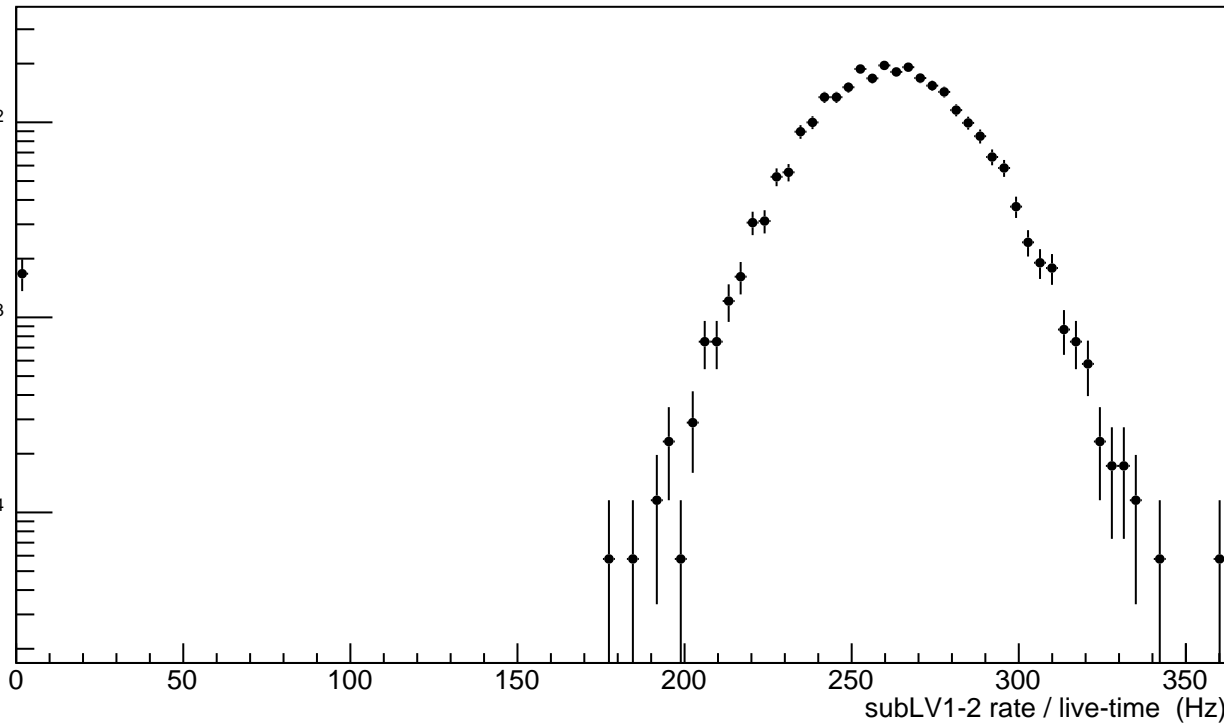

Supplement: s1 [file s1]

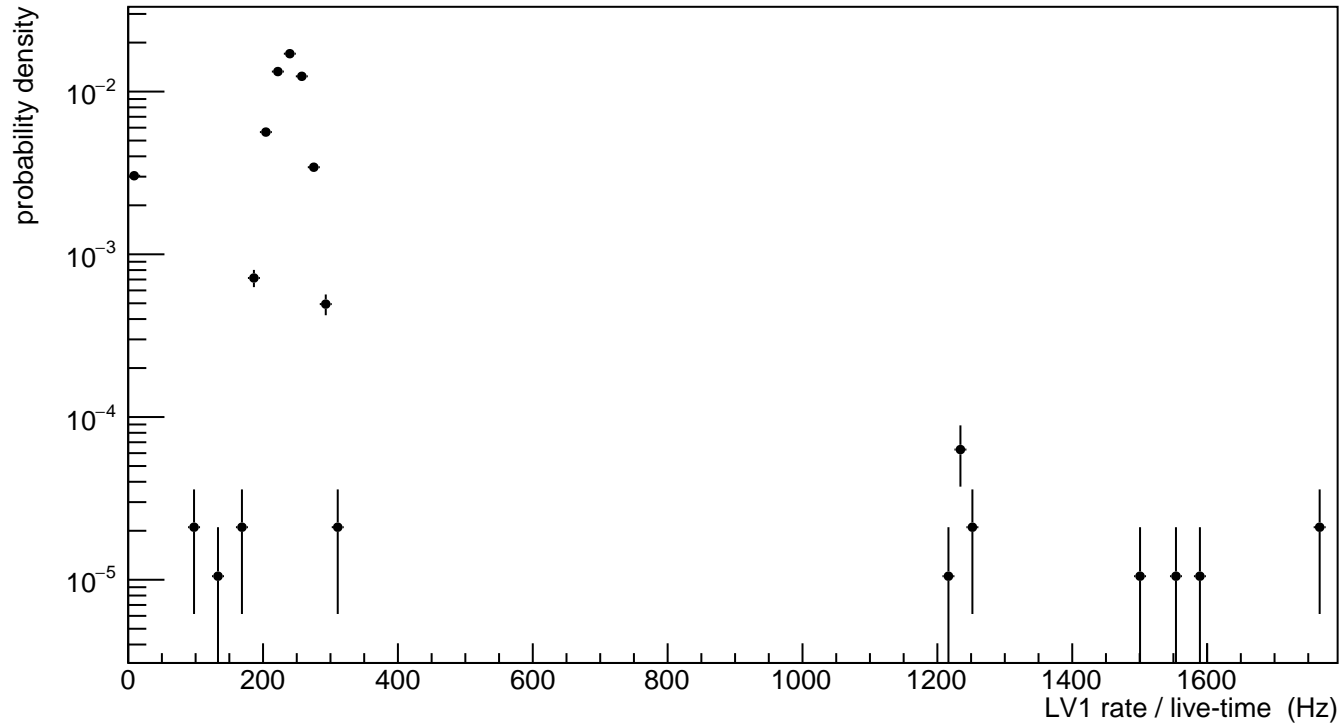

Supplement: s1 [file s1]

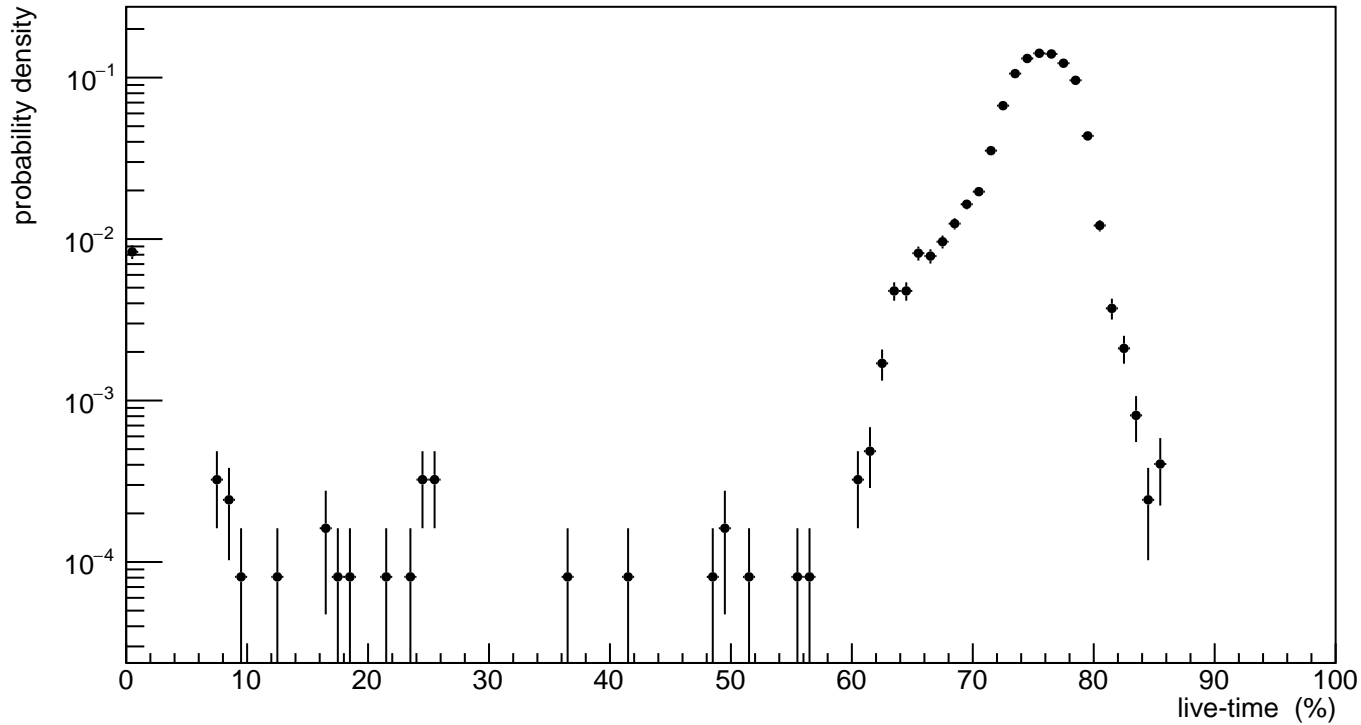

Supplement: s1 [file s1]

probability density

$10^{-3}$

$10^{-4}$

$10^{-5}$

0

500

1000

1500

2000

2500

LV1 rate / live-time (Hz)

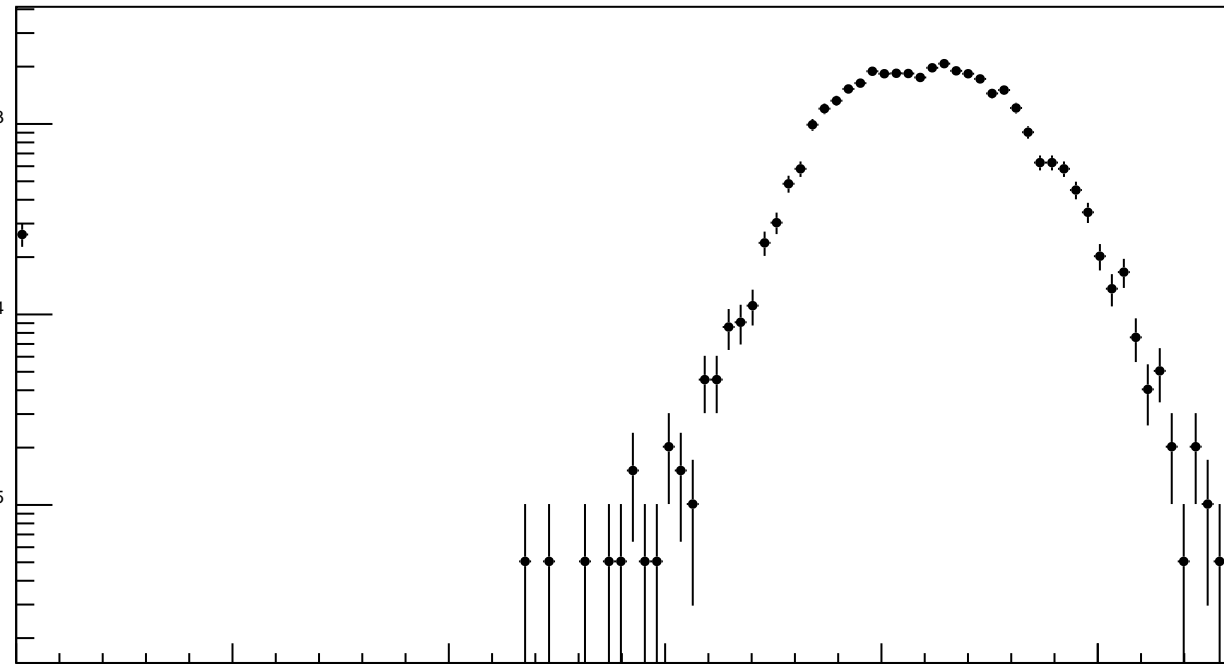

Supplement: s1 [file s1]

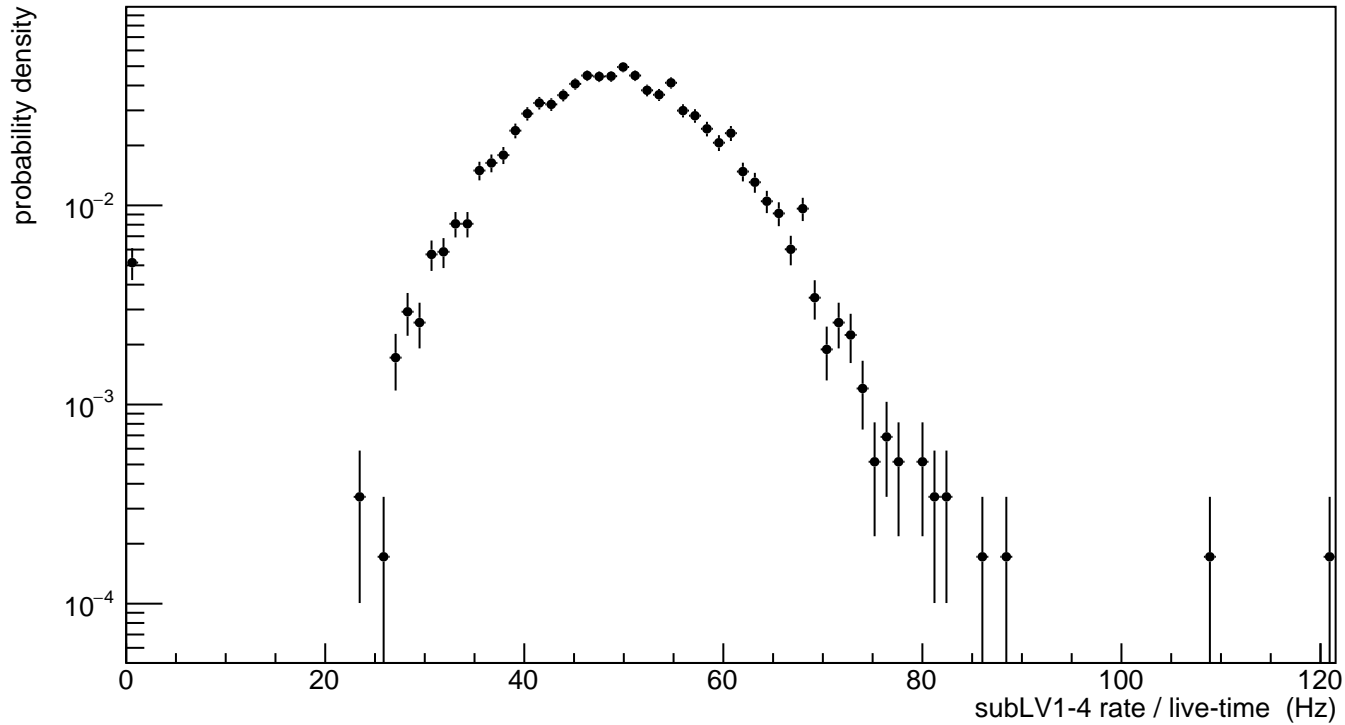

Supplement: s1 [file s1]

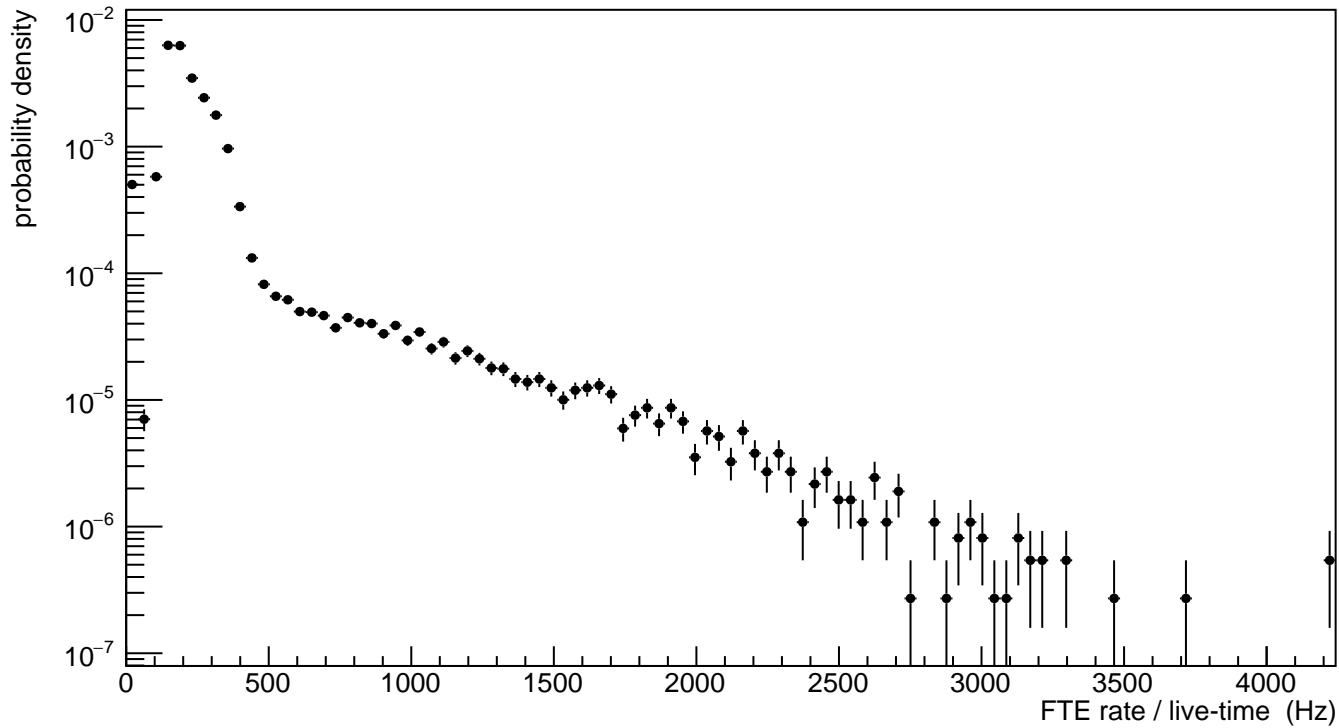

Supplement: s1 [file s1]

probability density

$10^{-2}$   
 $10^{-3}$   
 $10^{-4}$

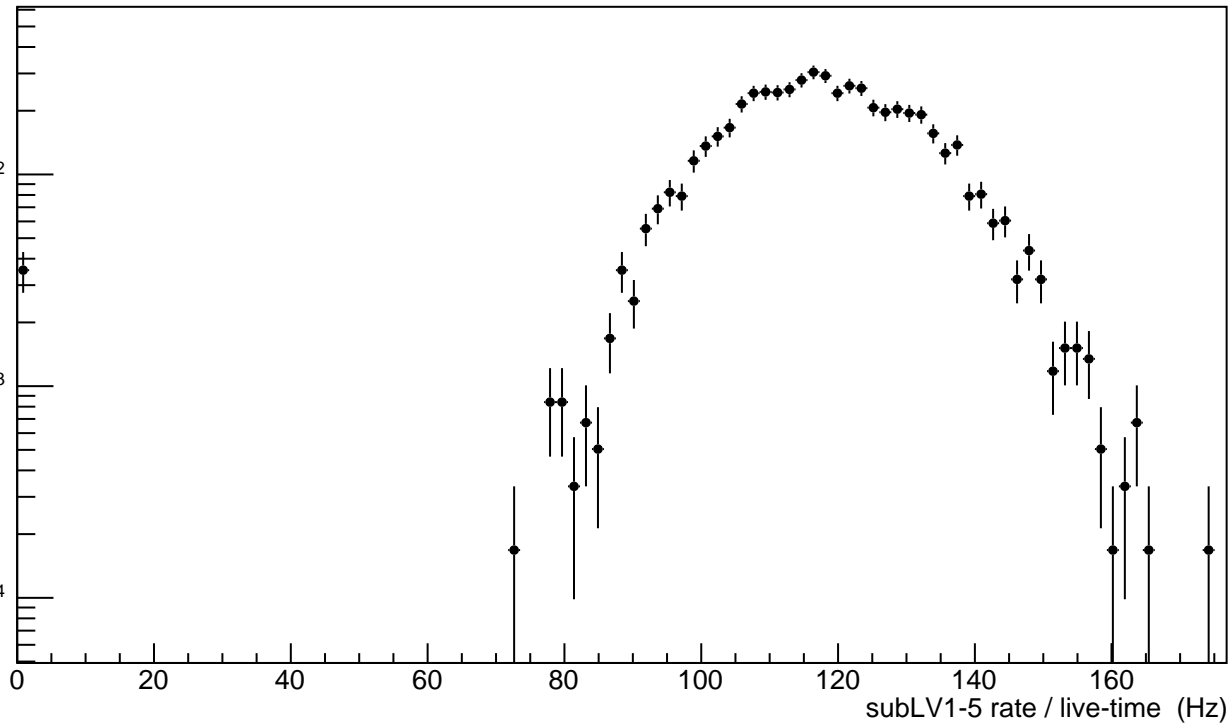

Supplement: s1 [file s1]

probability density

$10^{-2}$   
 $10^{-3}$   
 $10^{-4}$

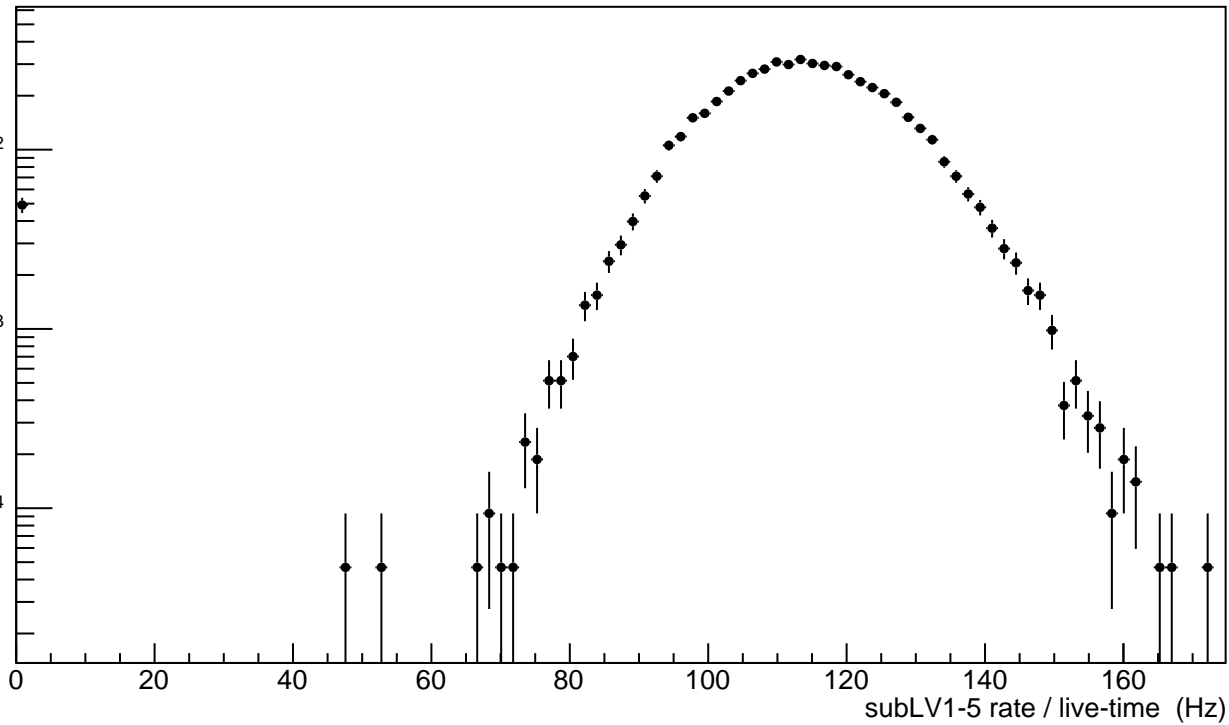

Supplement: s1 [file s1]

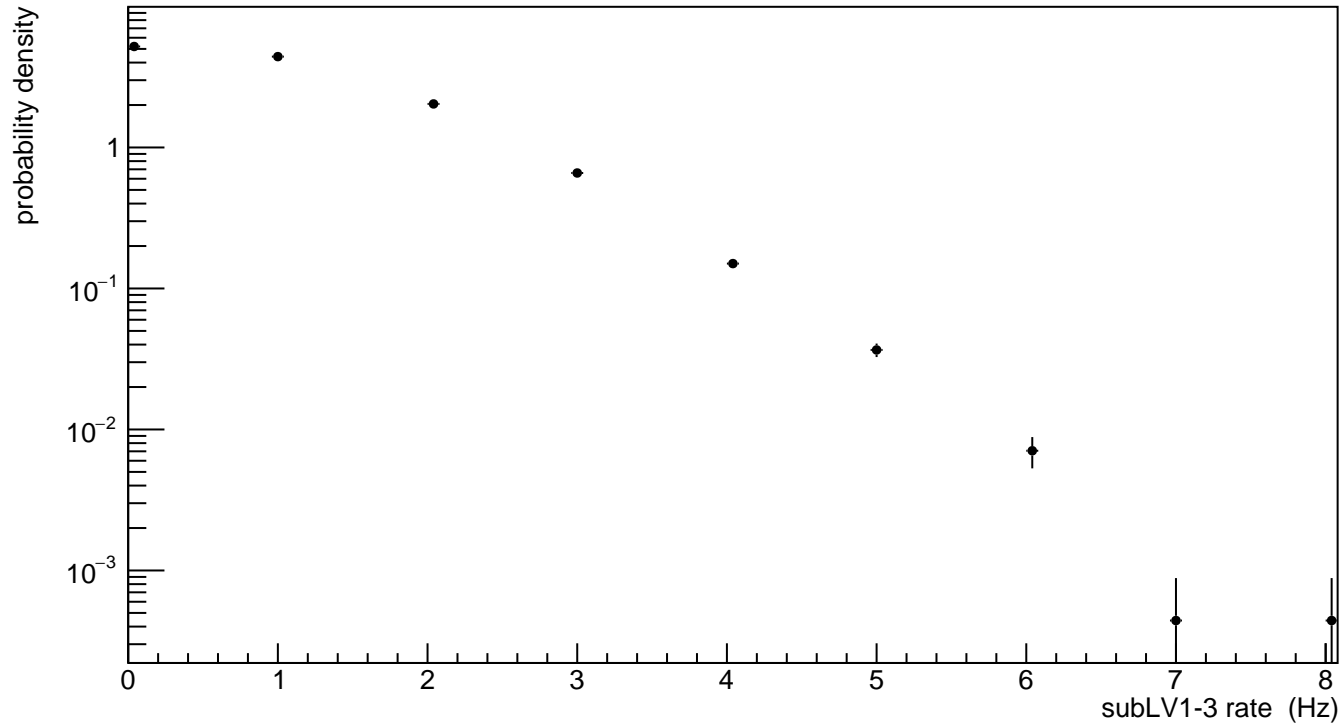

Supplement: s1 [file s1]

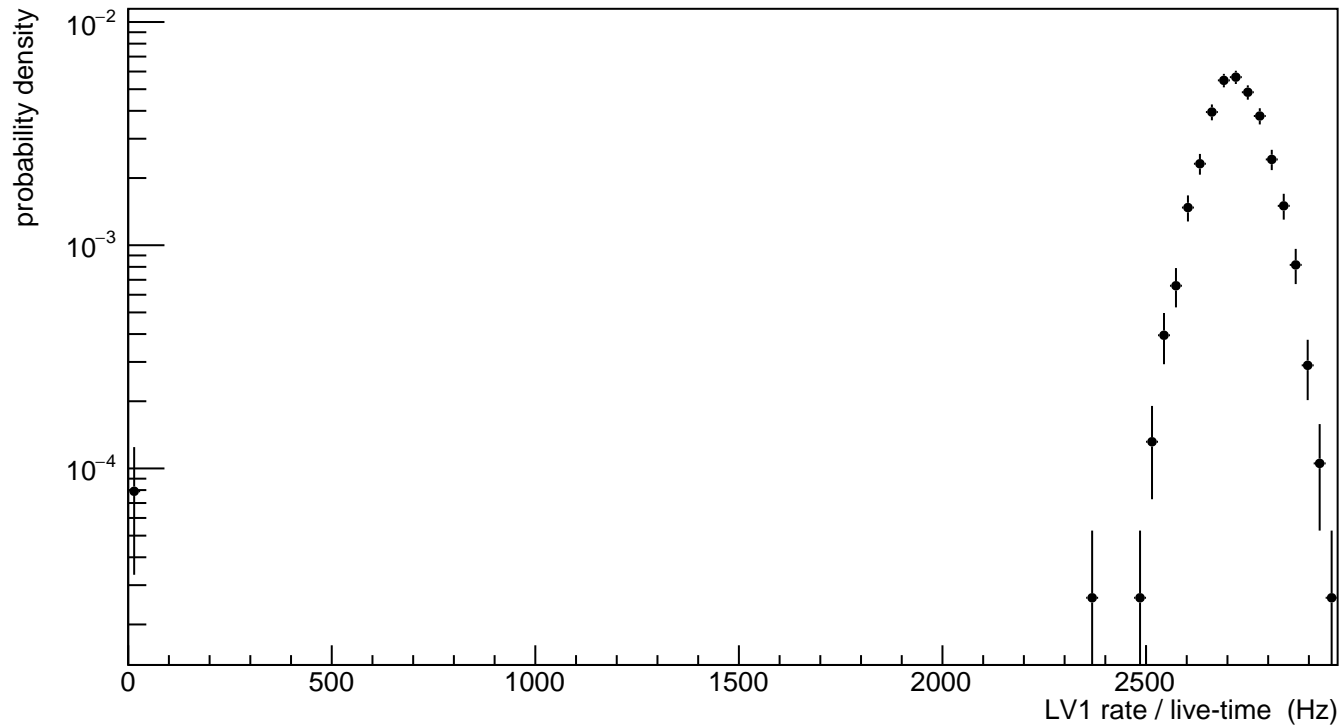

Supplement: s1 [file s1]

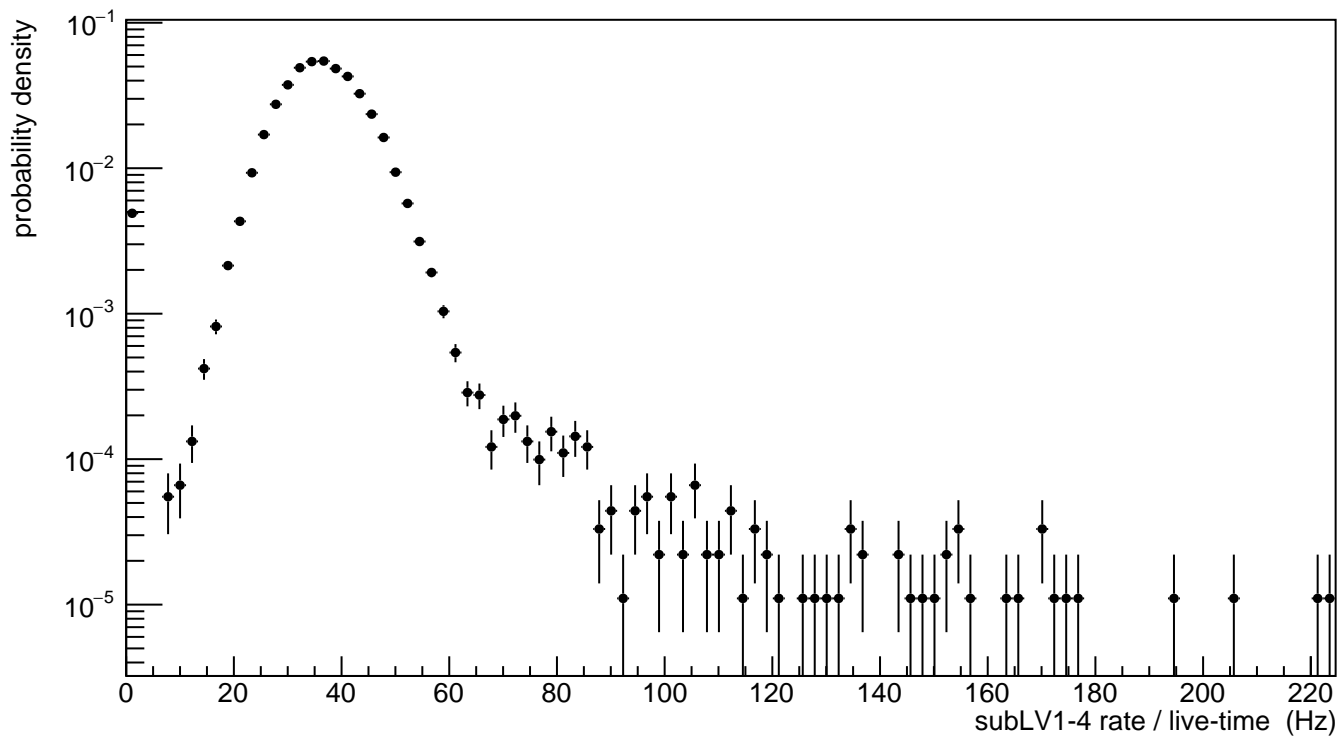

Supplement: s1 [file s1]

probability density

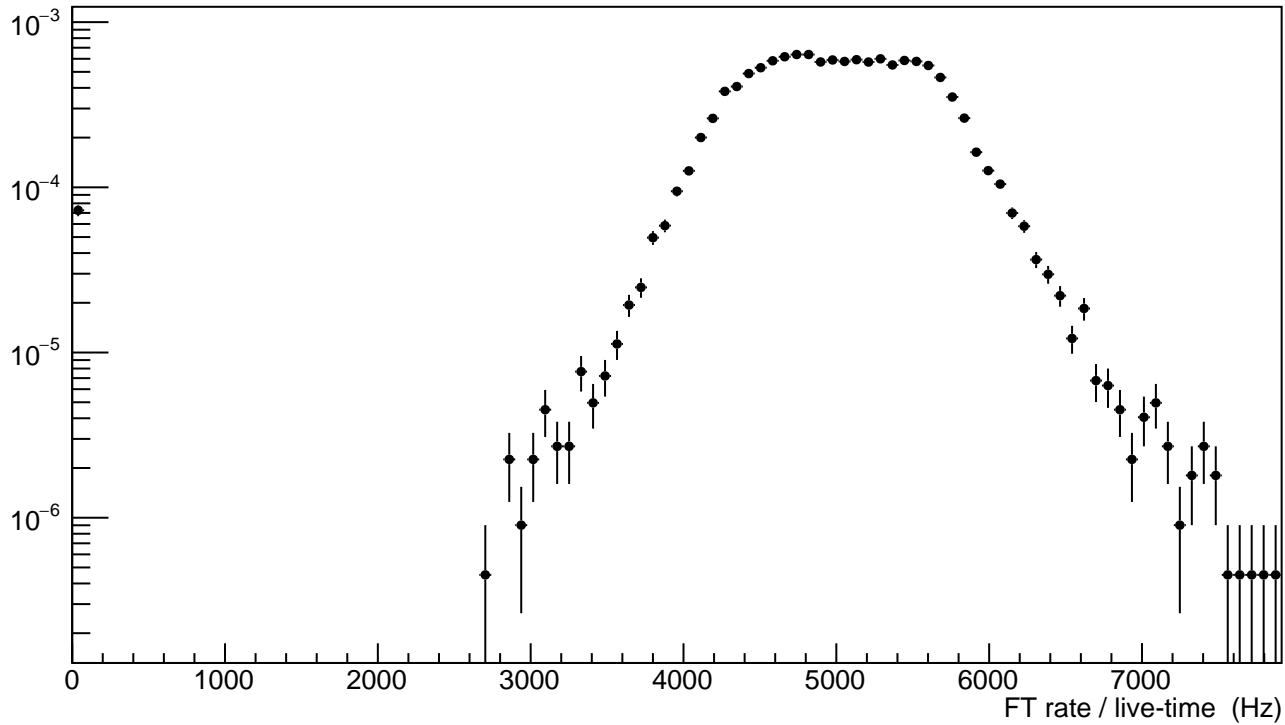

Supplement: s1 [file s1]

probability density

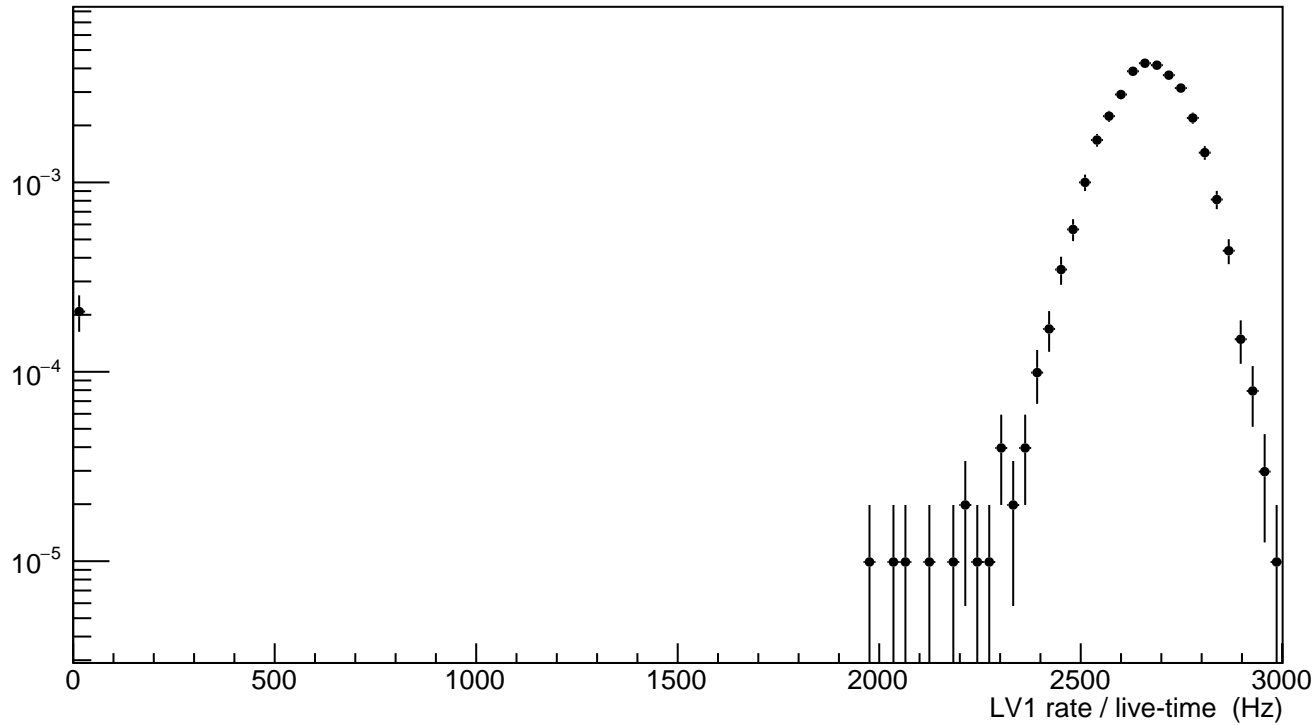

Supplement: s1 [file s1]

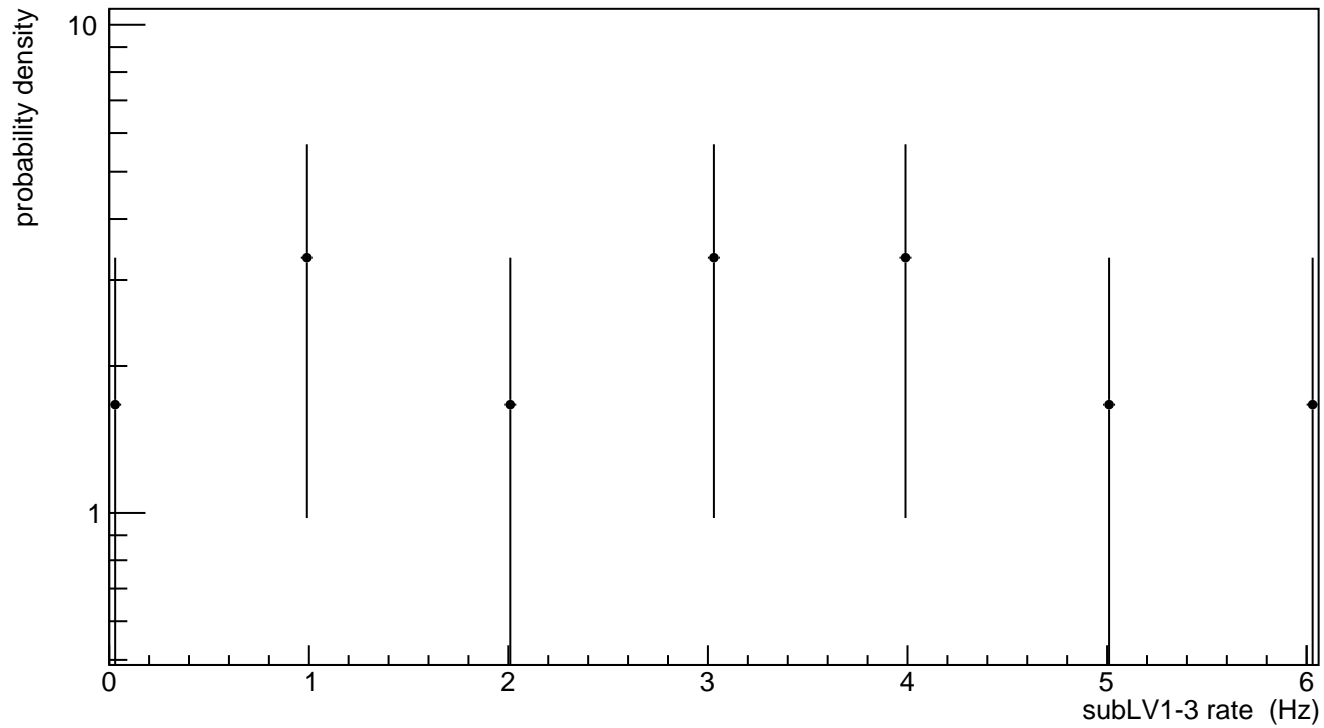

Supplement: s1 [file s1]

probability density

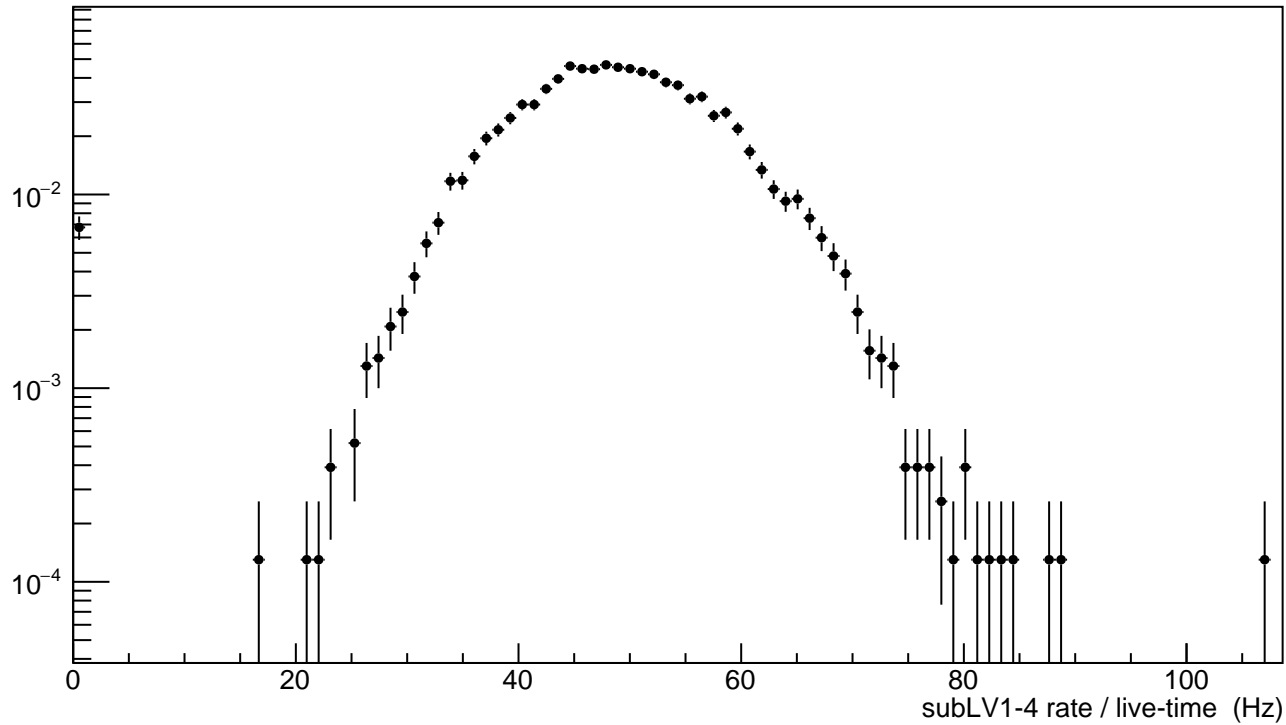

Supplement: s1 [file s1]

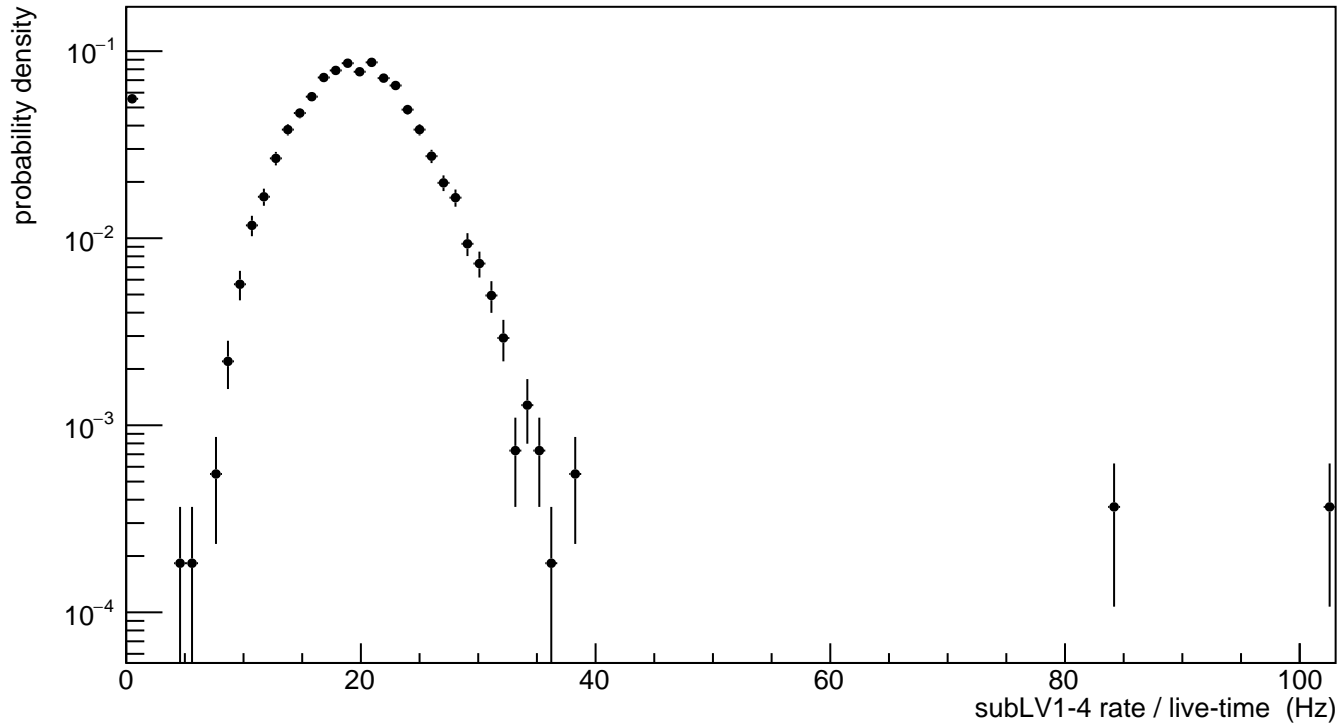

Supplement: s1 [file s1]

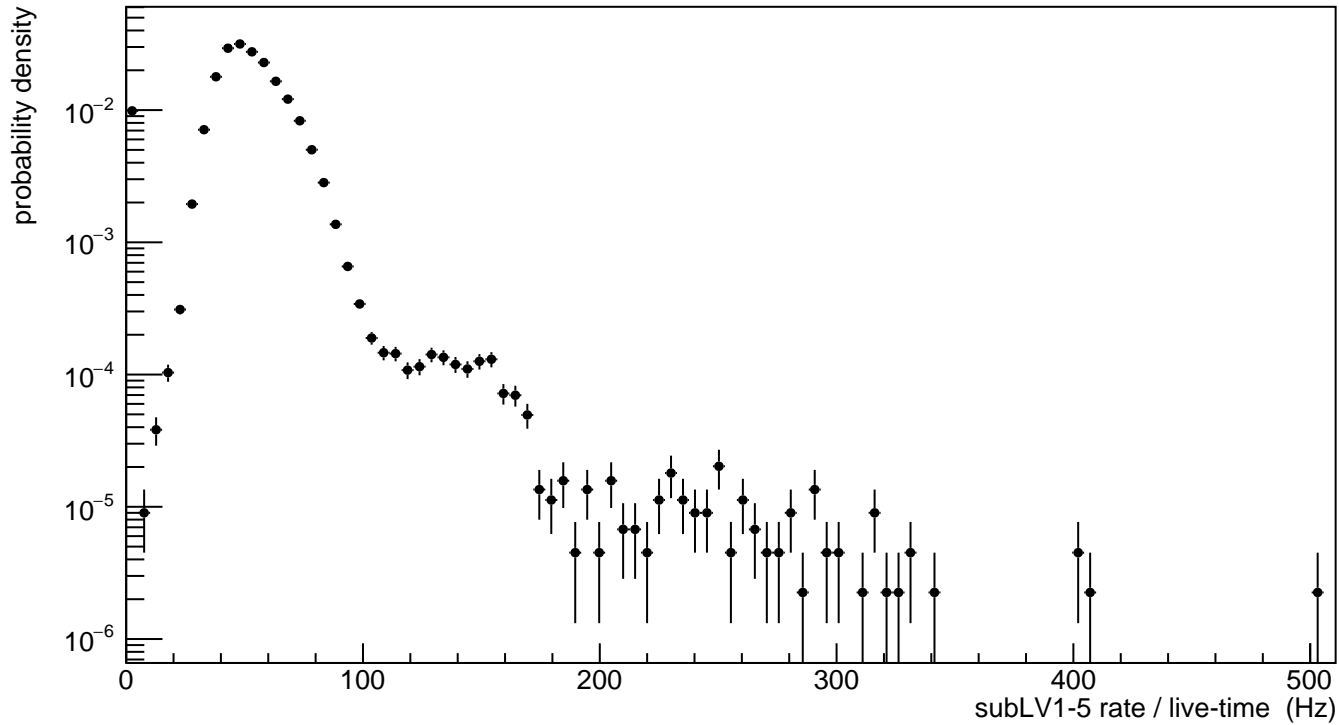

Supplement: s1 [file s1]

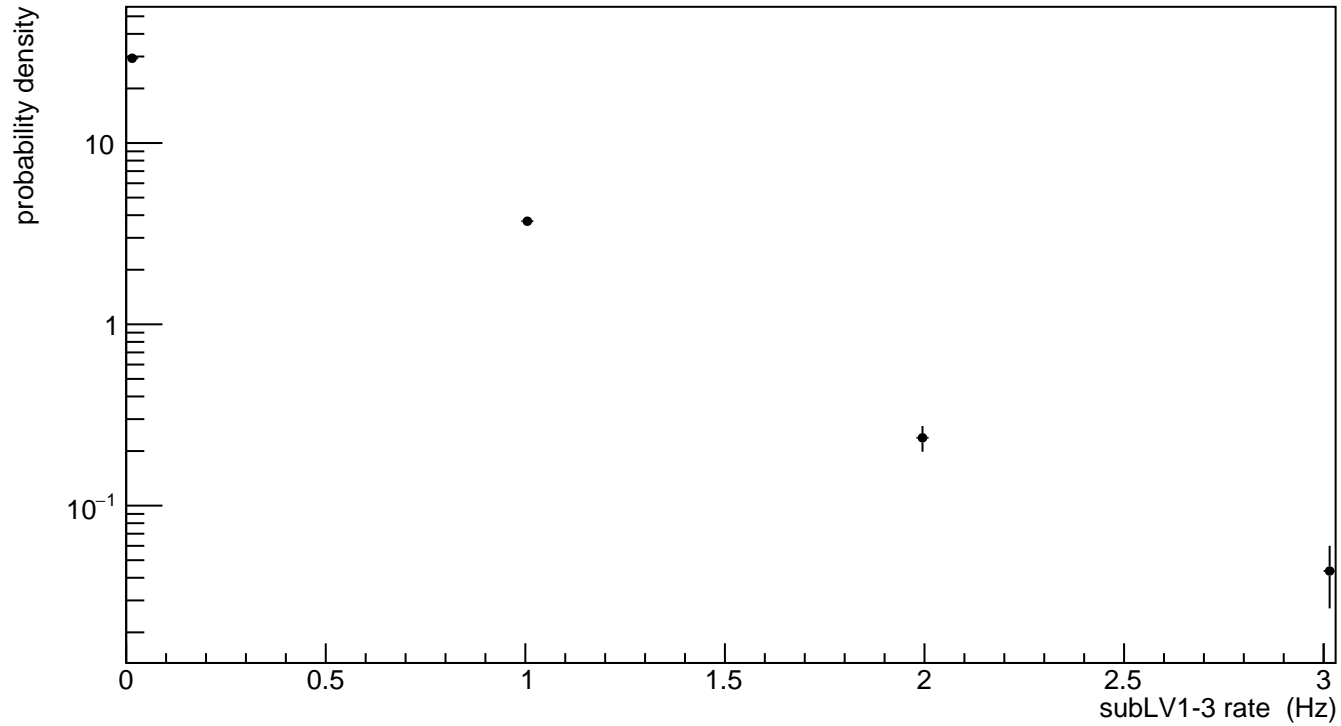

Supplement: s1 [file s1]

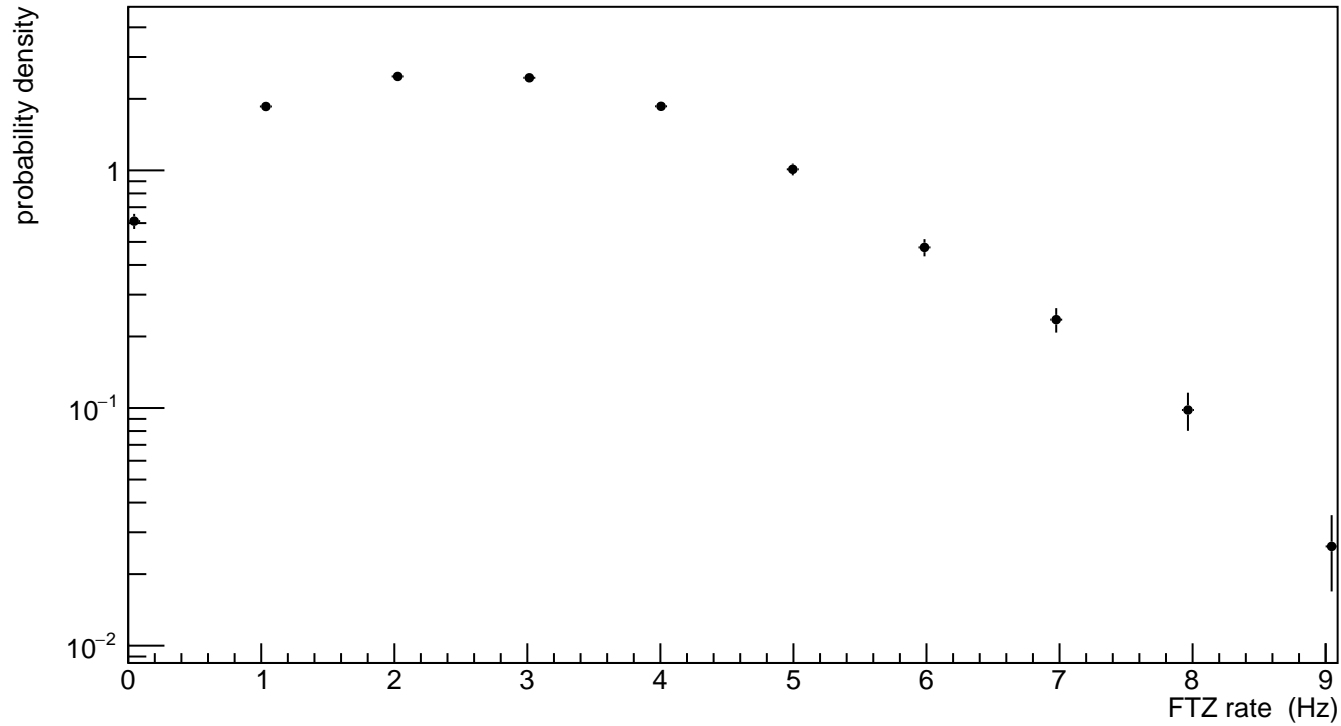

Supplement: s1 [file s1]

probability density

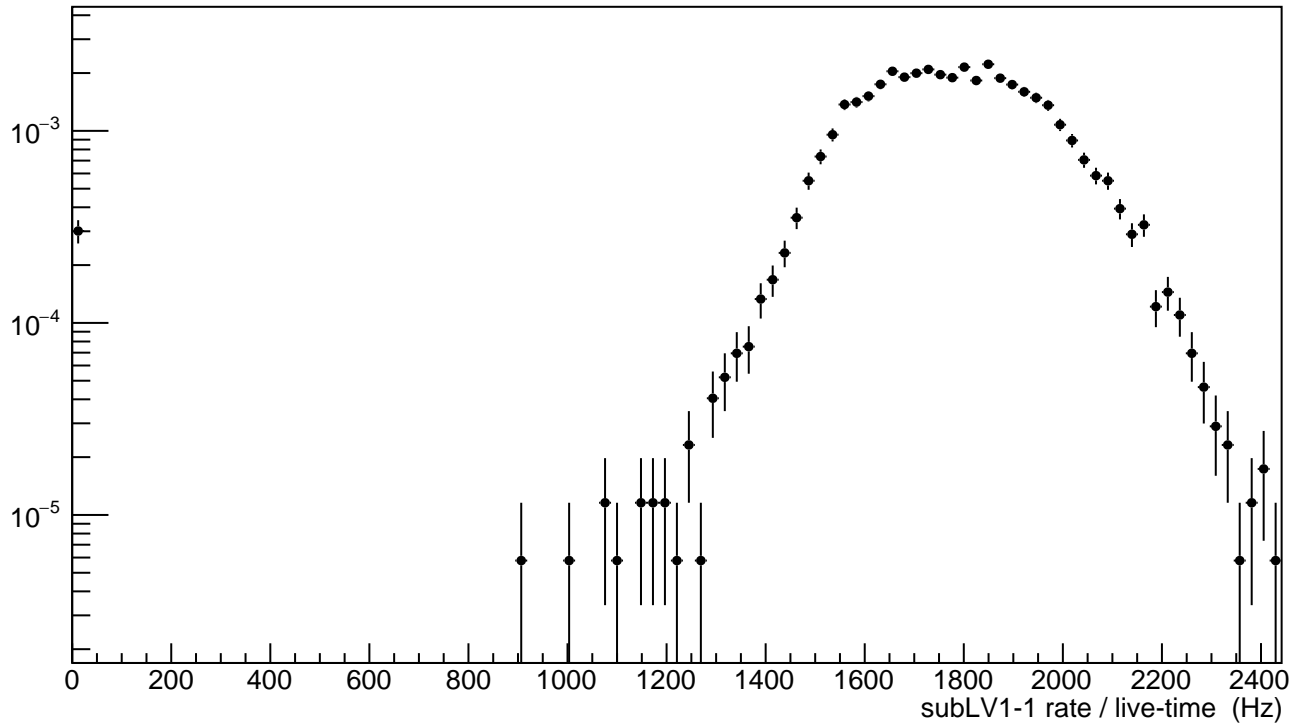

Supplement: s1 [file s1]

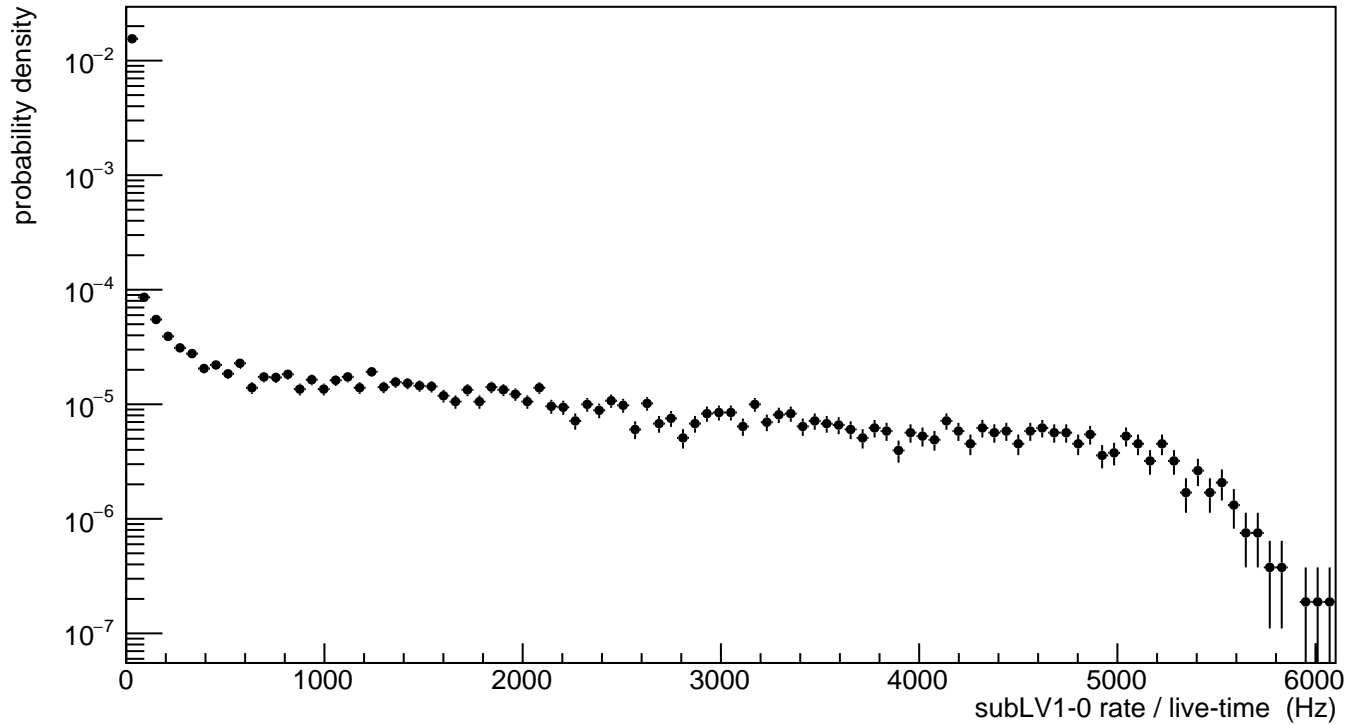

Supplement: s1 [file s1]

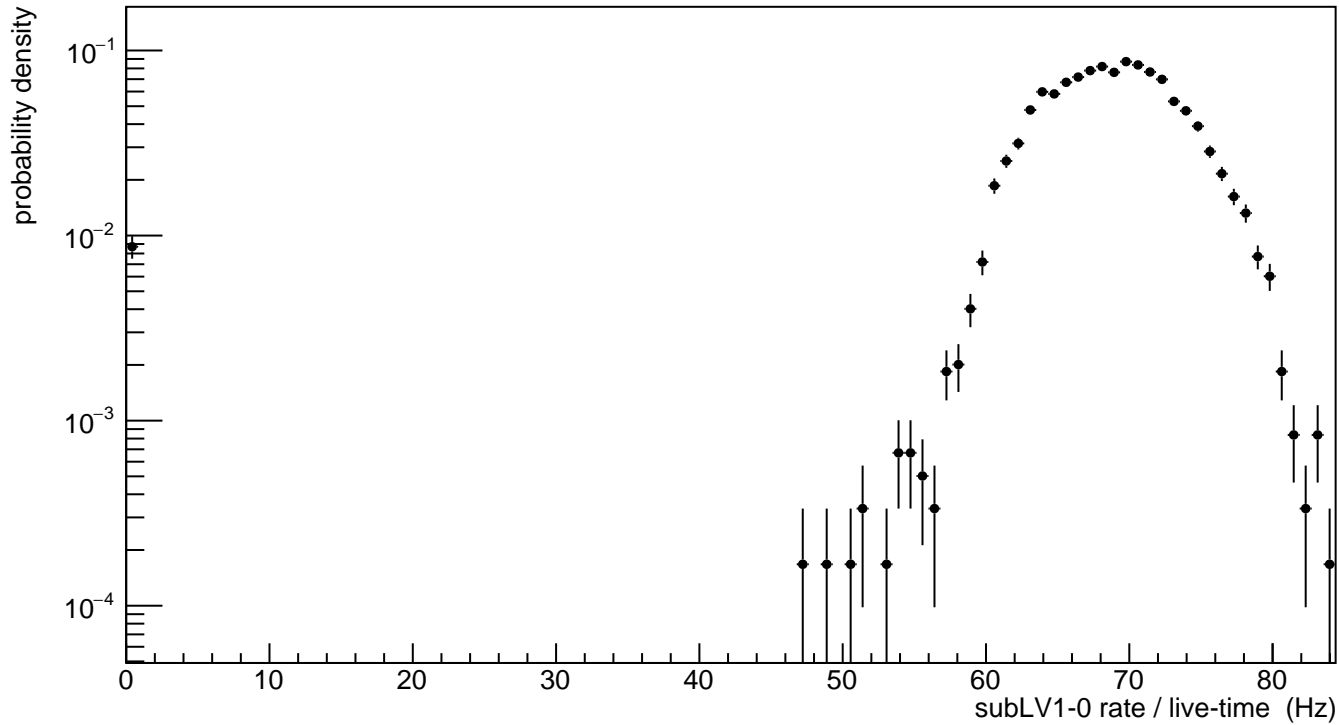

Supplement: s1 [file s1]

probability density

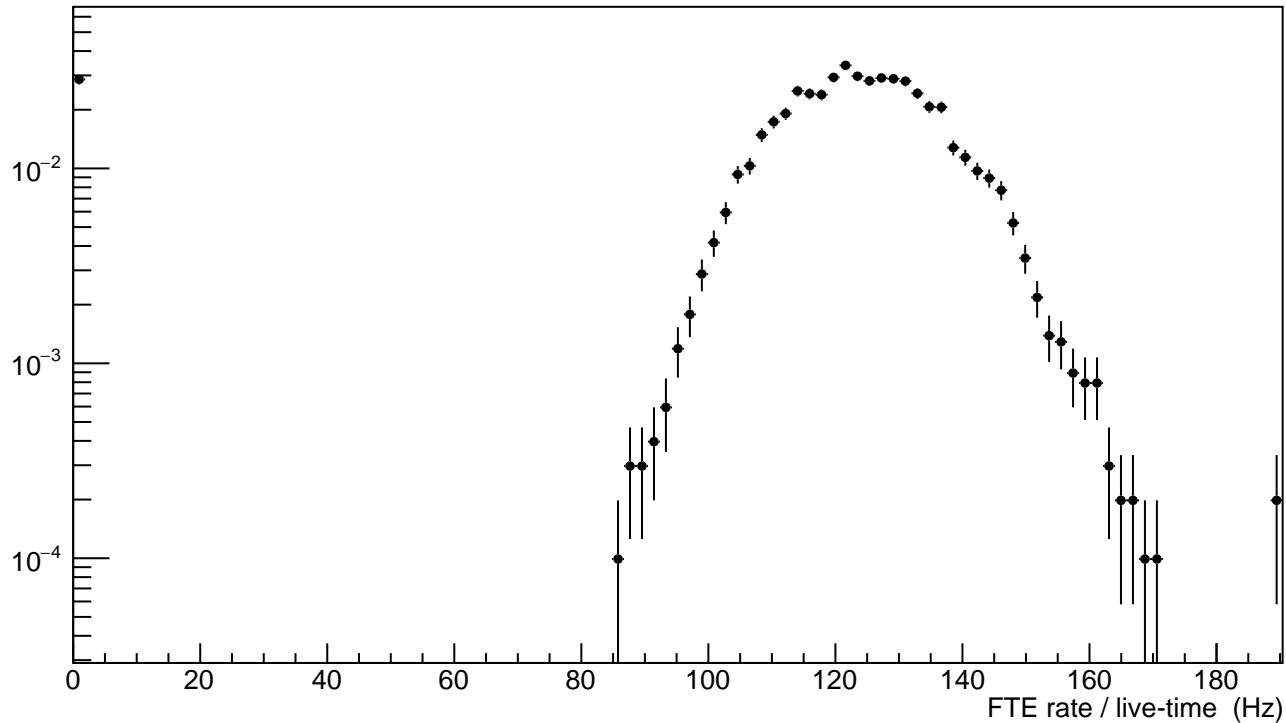

Supplement: s1 [file s1]

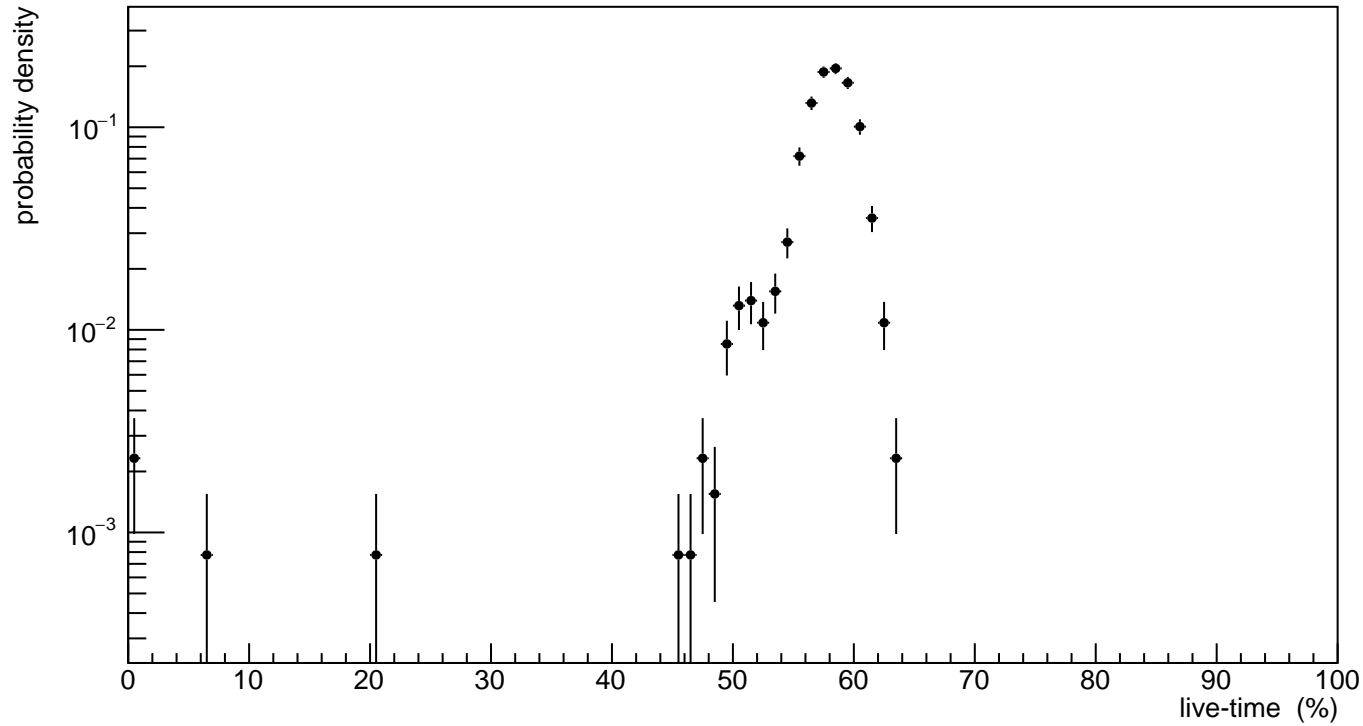

Supplement: s1 [file s1]

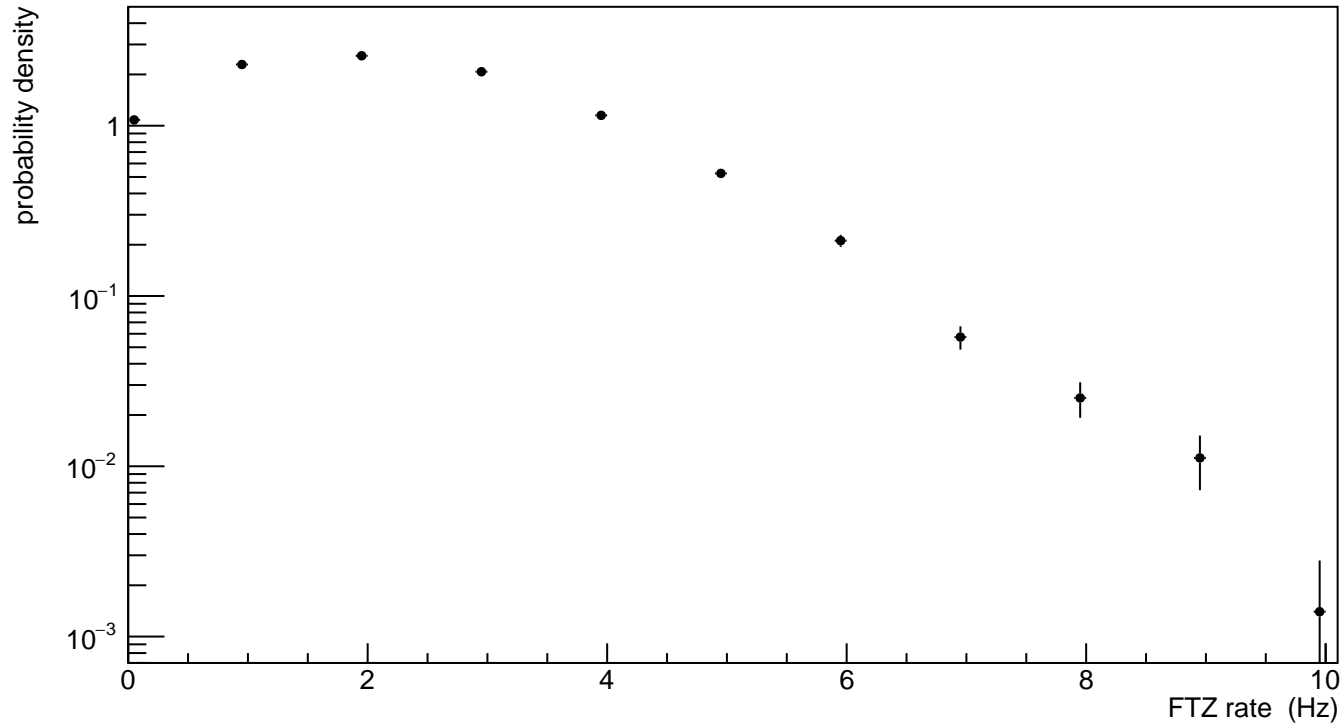

Supplement: s1 [file s1]

probability density

$10^{-3}$

$10^{-4}$

$10^{-5}$

0

1000

2000

3000

4000

5000

6000

7000

8000

9000

FT rate / live-time (Hz)

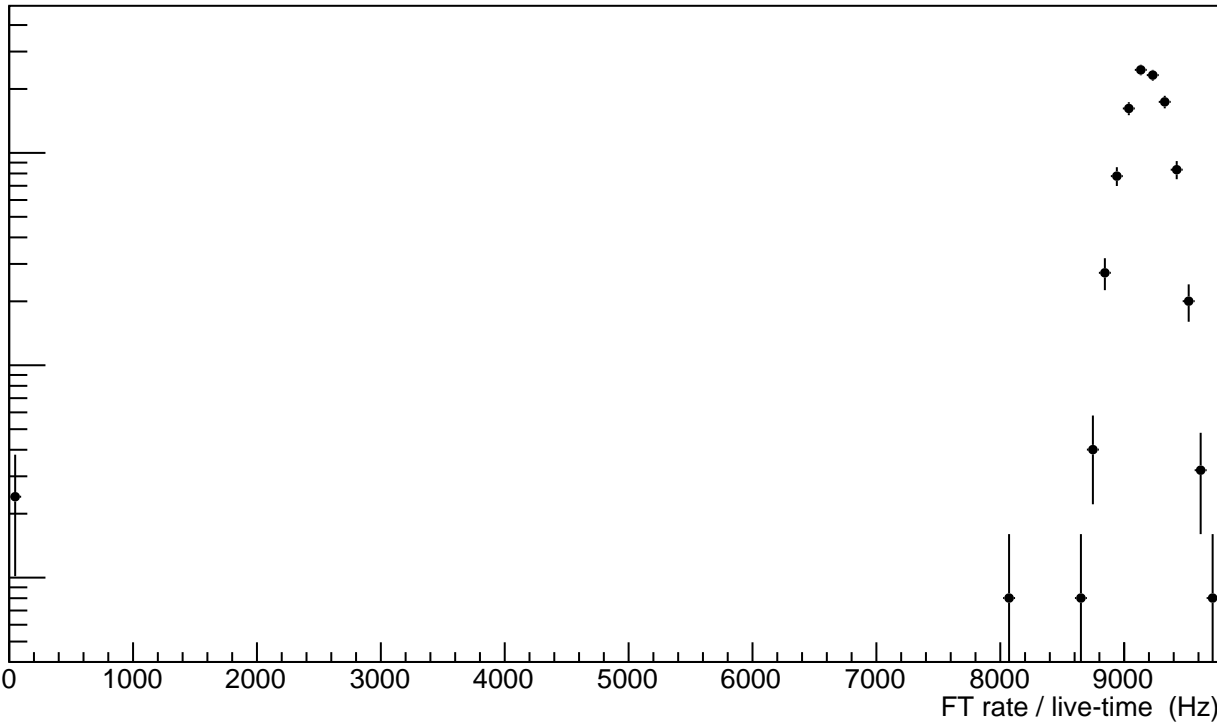

Supplement: s1 [file s1]

probability density

$10^{-3}$

$10^{-4}$

$10^{-5}$

0

500

1000

1500

2000

2500

subLV1-1 rate / live-time (Hz)

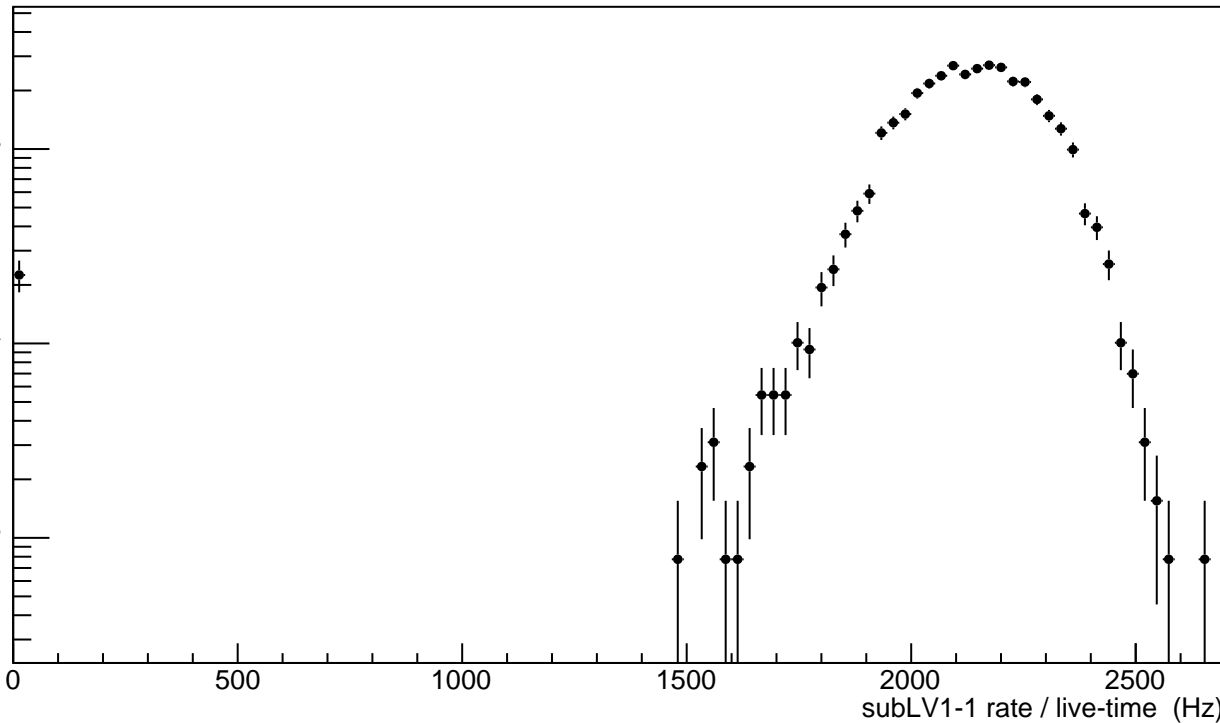

Supplement: s1 [file s1]

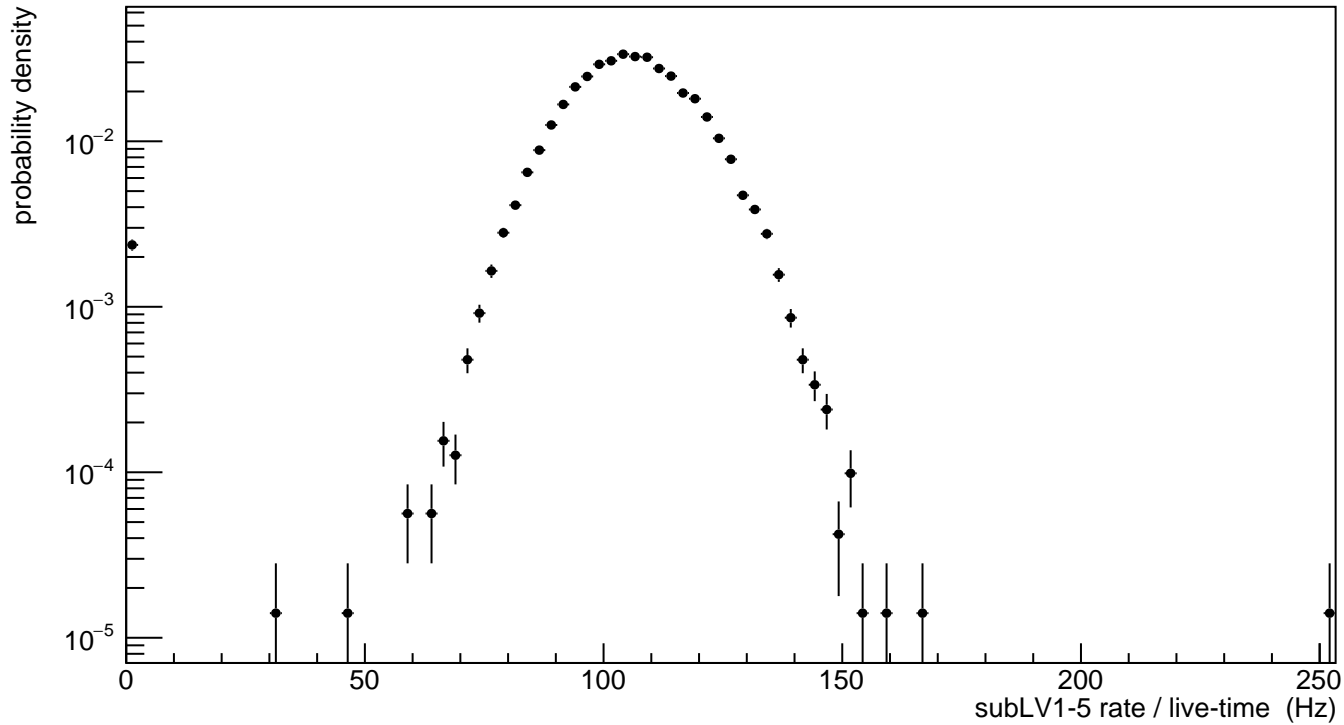

Supplement: s1 [file s1]

probability density

$10^{-1}$

0

20

40

60

80

100

120

subLV1-5 rate / live-time (Hz)

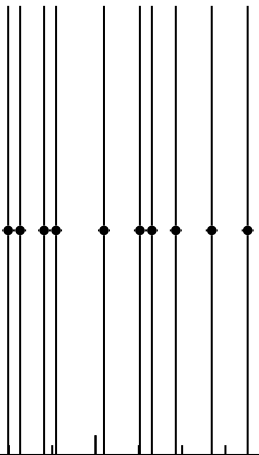

Supplement: s1 [file s1]

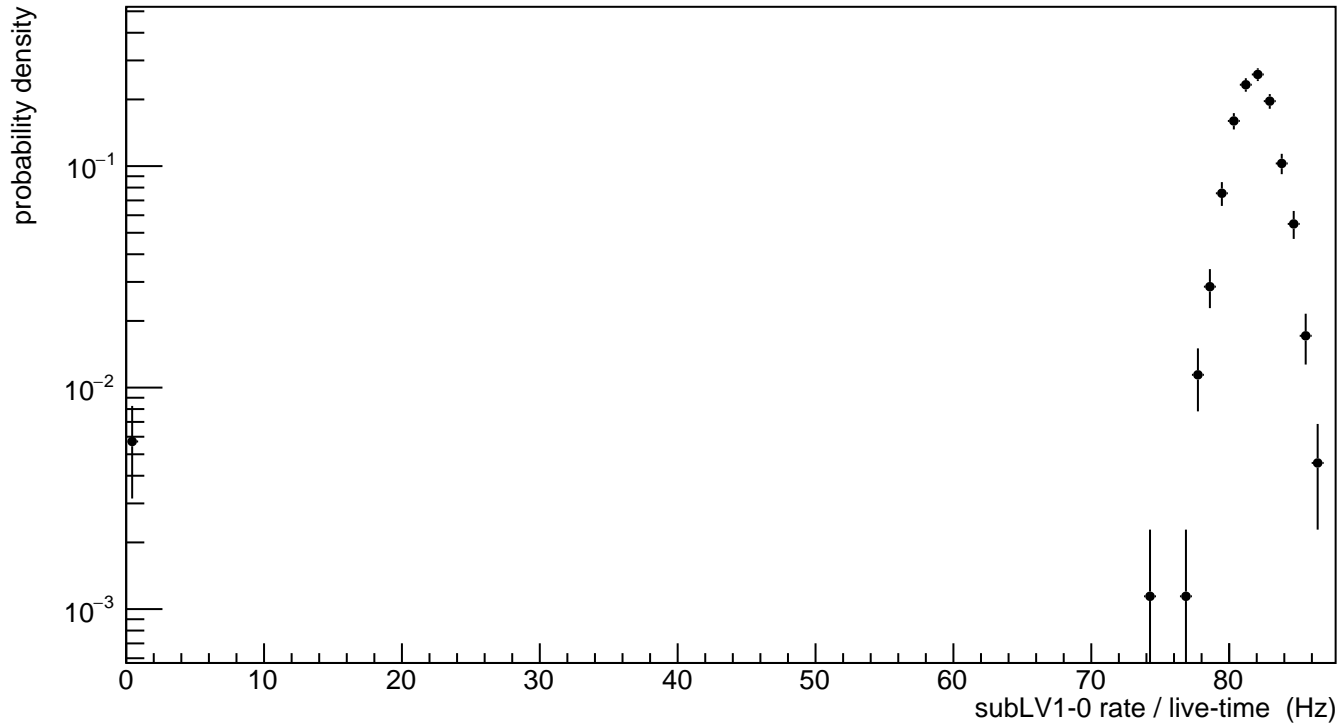

Supplement: s1 [file s1]

probability density

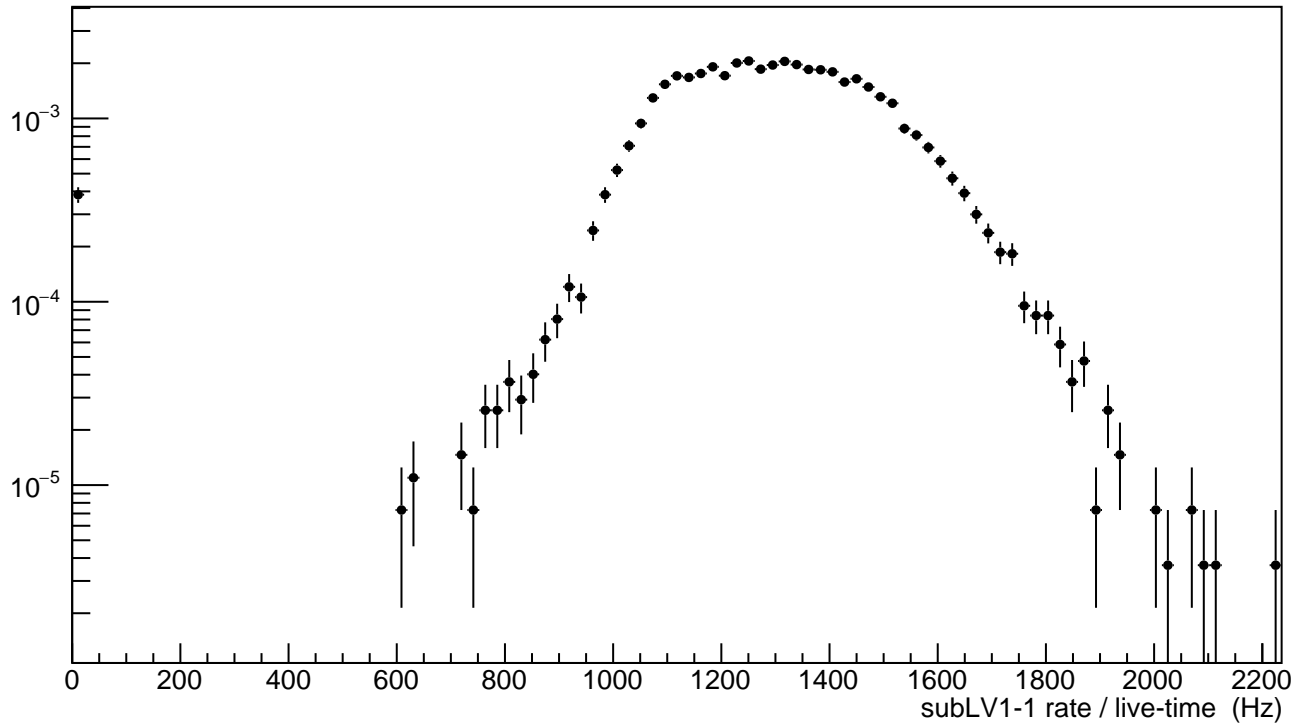

Supplement: s1 [file s1]

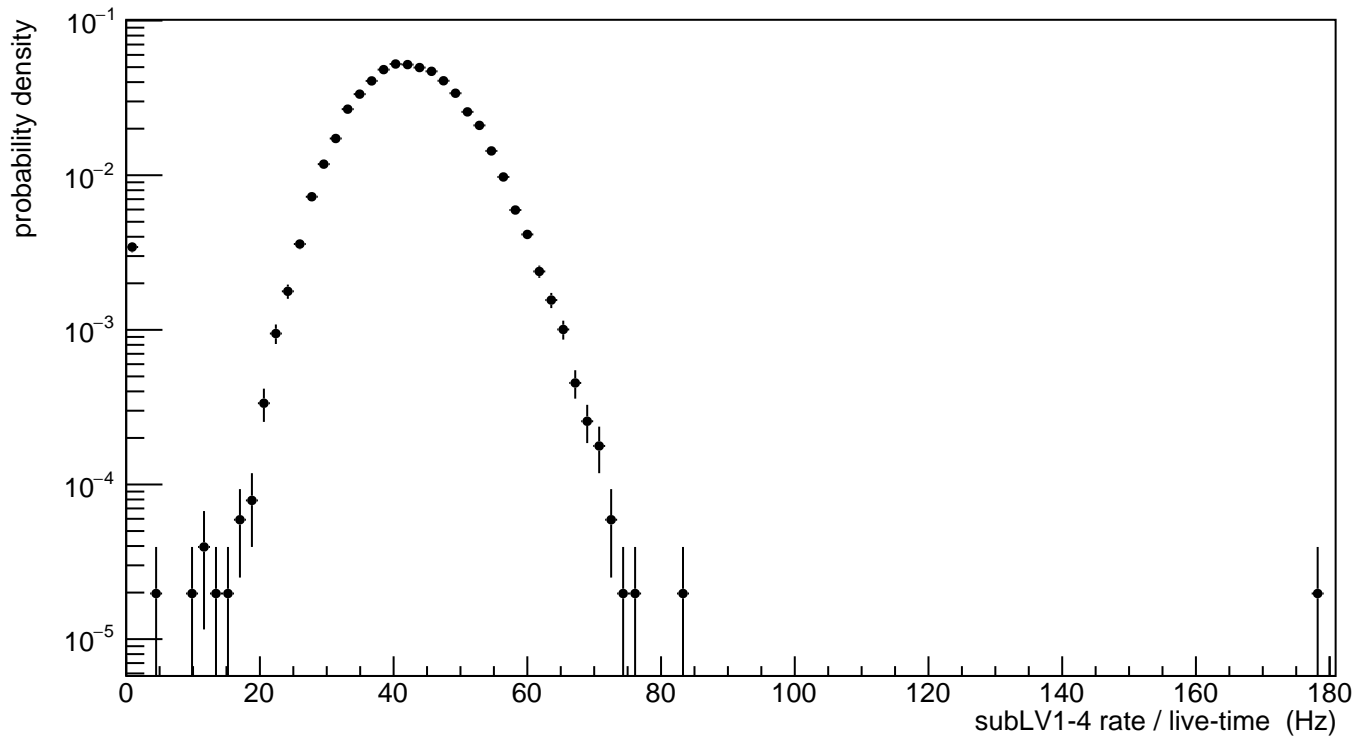

Supplement: s1 [file s1]

probability density

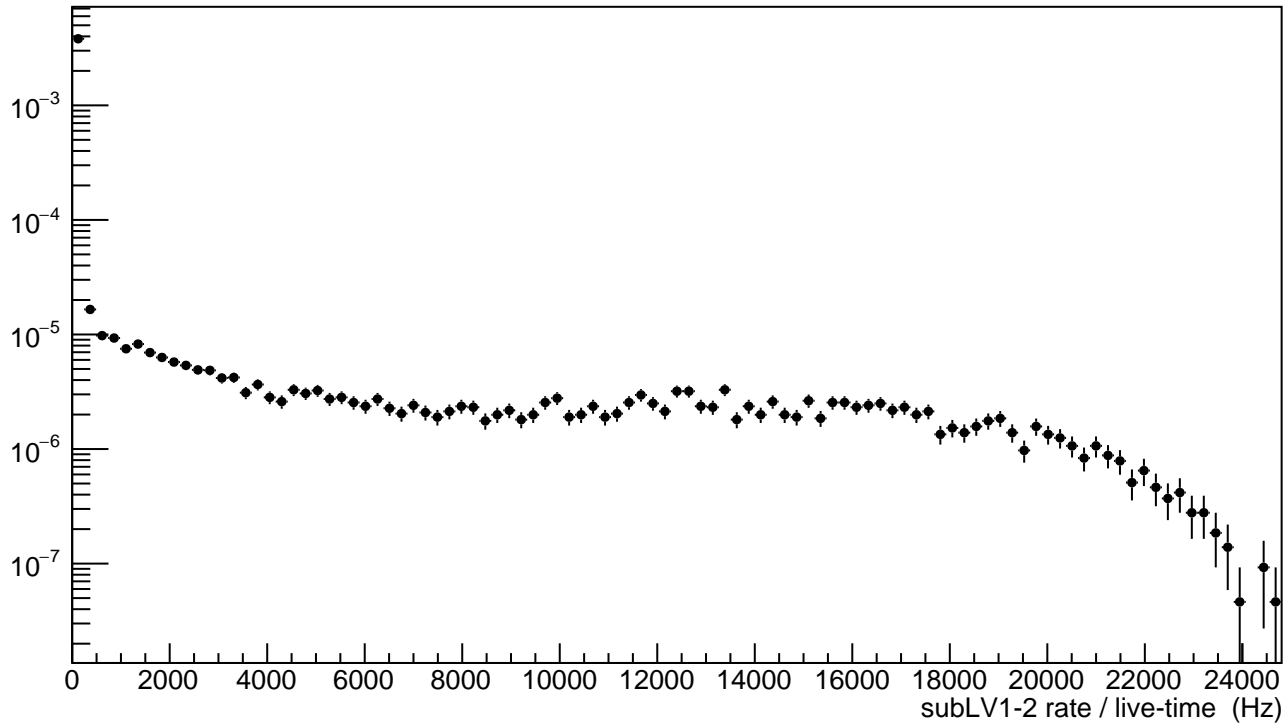

Supplement: s1 [file s1]

probability density

$10^{-2}$

$10^{-3}$

0

20

40

60

80

100

120

140

160

subLV1-5 rate / live-time (Hz)

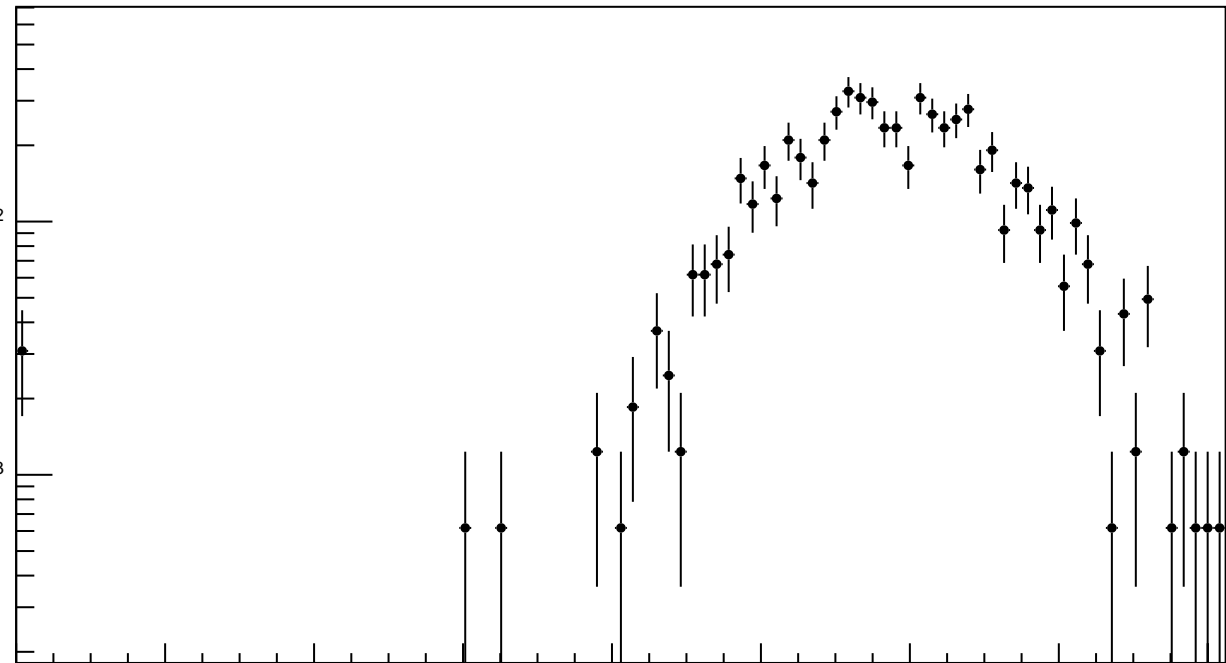

Supplement: s1 [file s1]

probability density

$10^{-1}$   
 $10^{-2}$   
 $10^{-3}$   
 $10^{-4}$

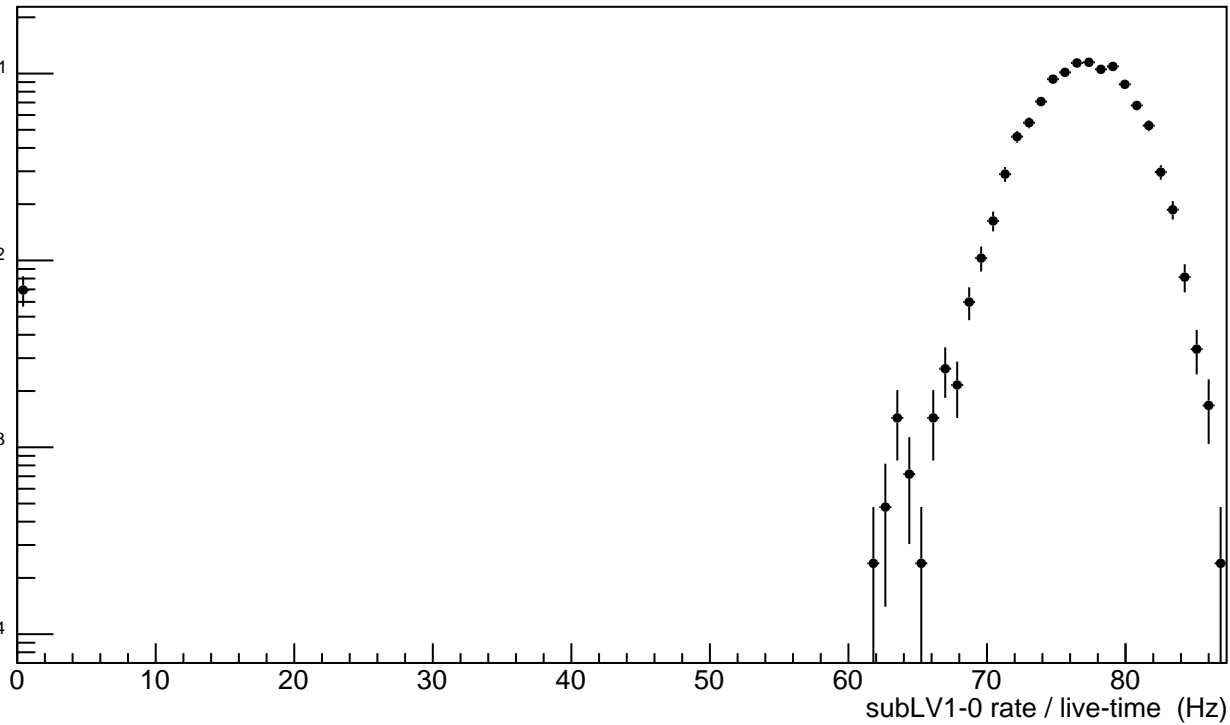

Supplement: s1 [file s1]

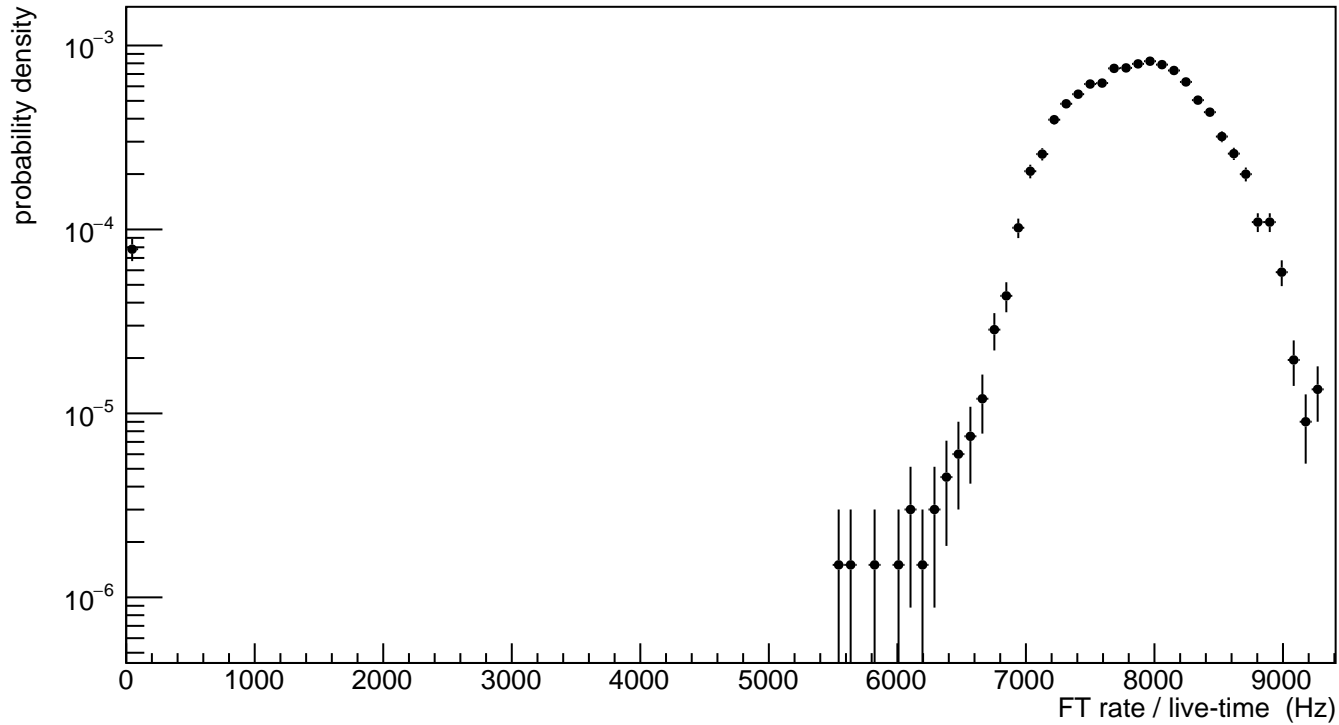

Supplement: s1 [file s1]

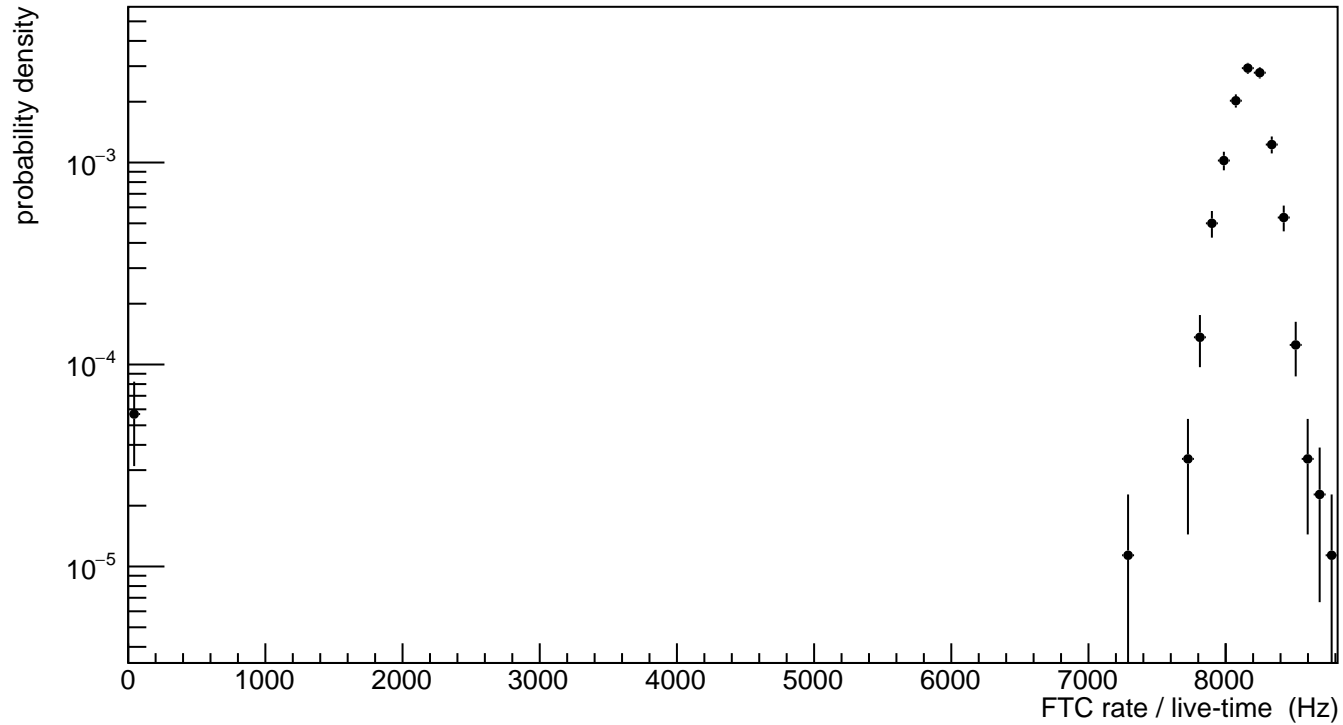

Supplement: s1 [file s1]

probability density

$10^{-2}$

0

500

1000

1500

2000

2500

subLV1-1 rate / live-time (Hz)

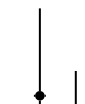

Supplement: s1 [file s1]

probability density

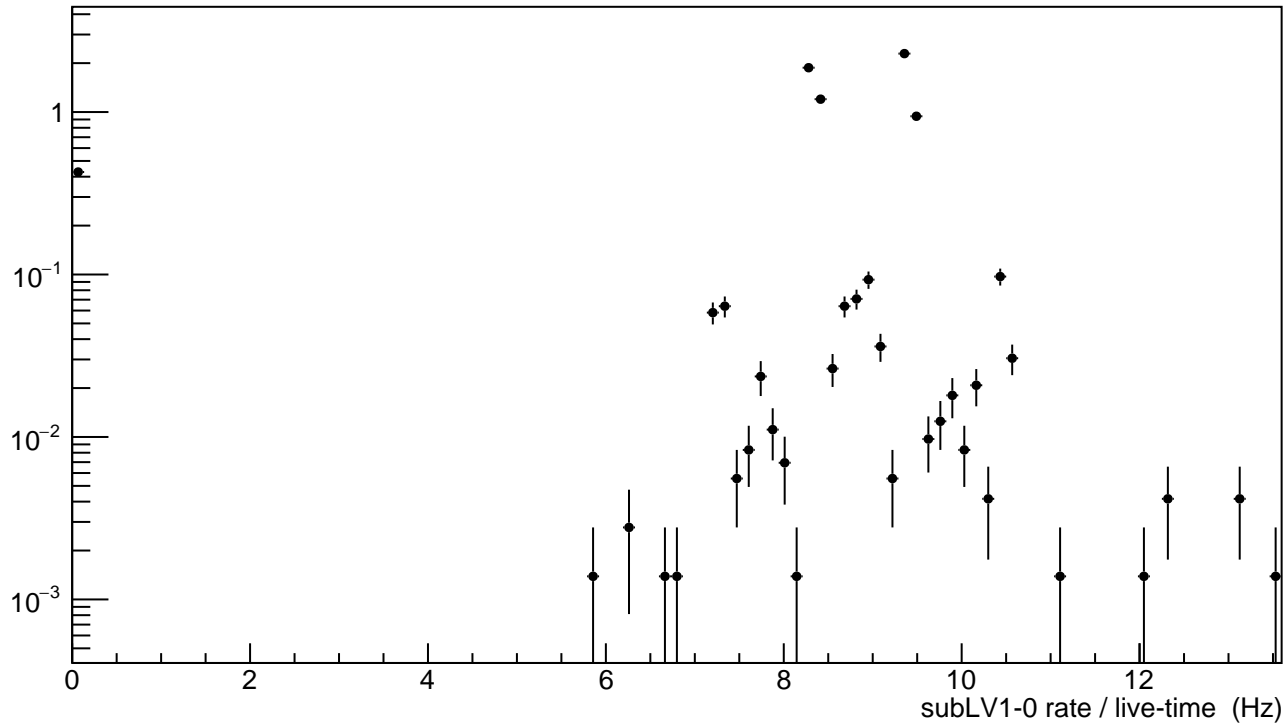

Supplement: s1 [file s1]

probability density

$10^{-2}$

$10^{-3}$

0

50

100

150

200

250

300

350

subLV1-2 rate / live-time (Hz)

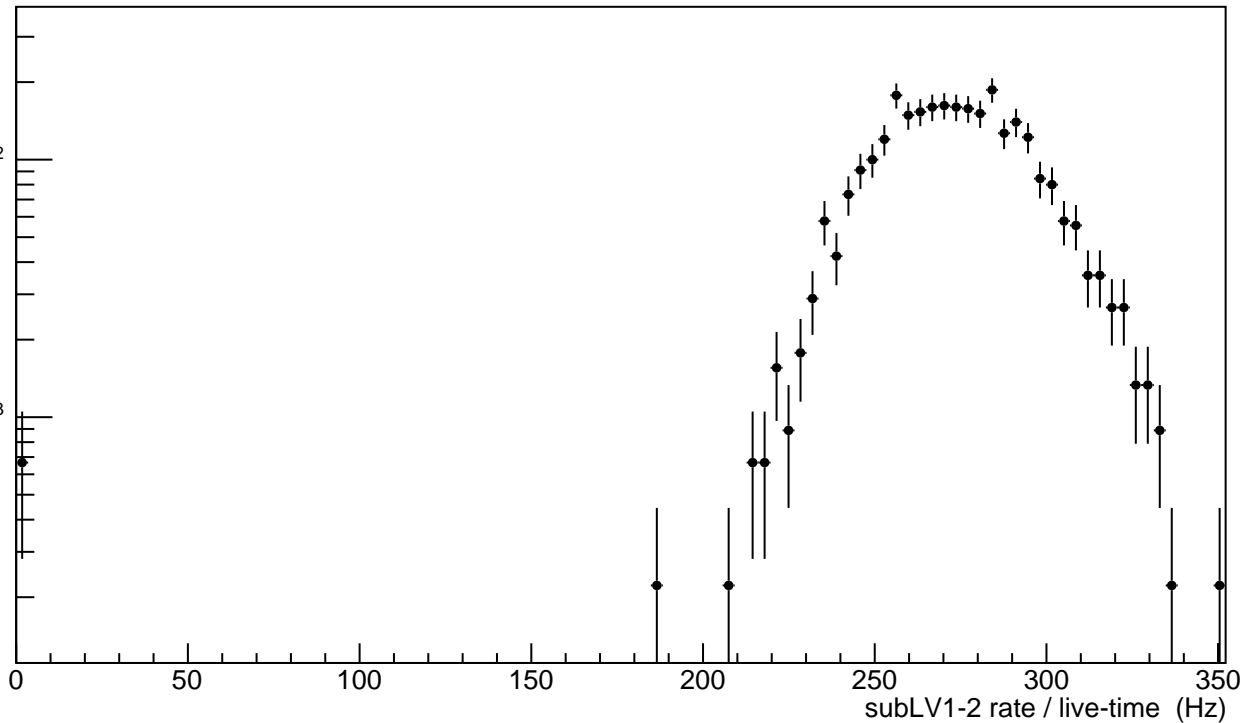

Supplement: s1 [file s1]

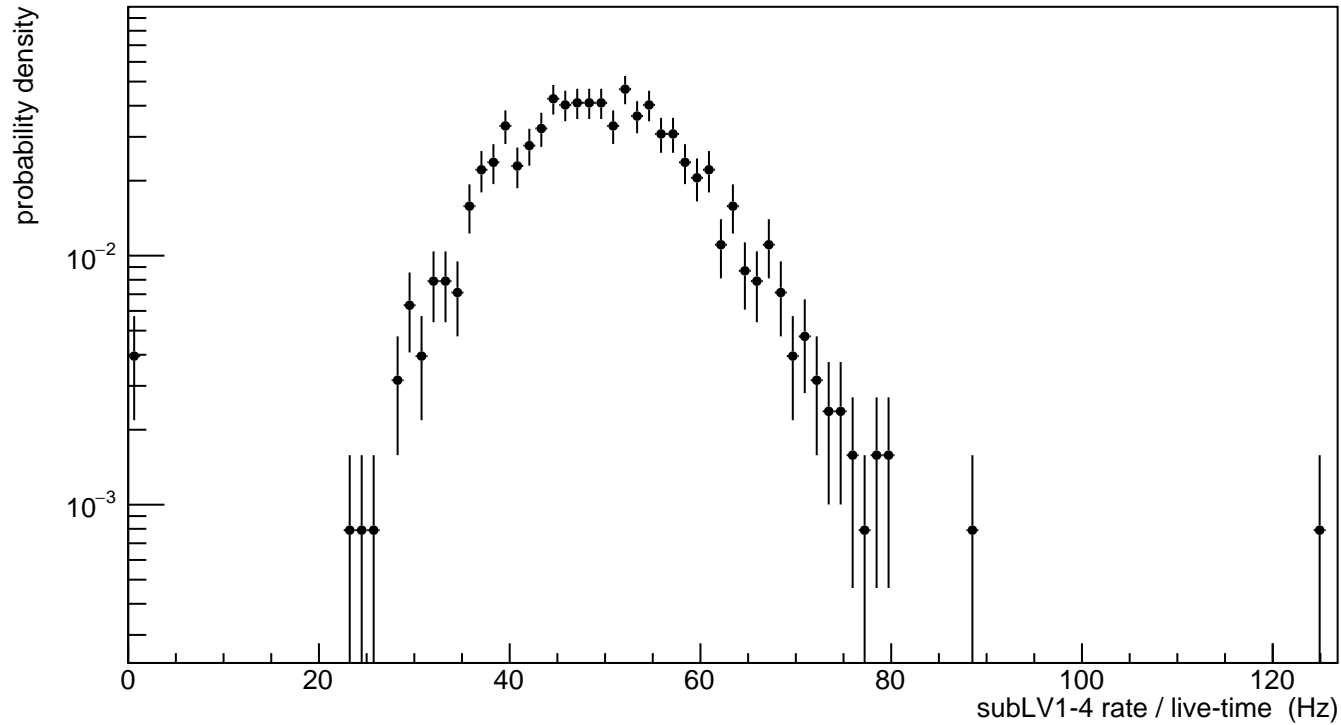

Supplement: s1 [file s1]

probability density

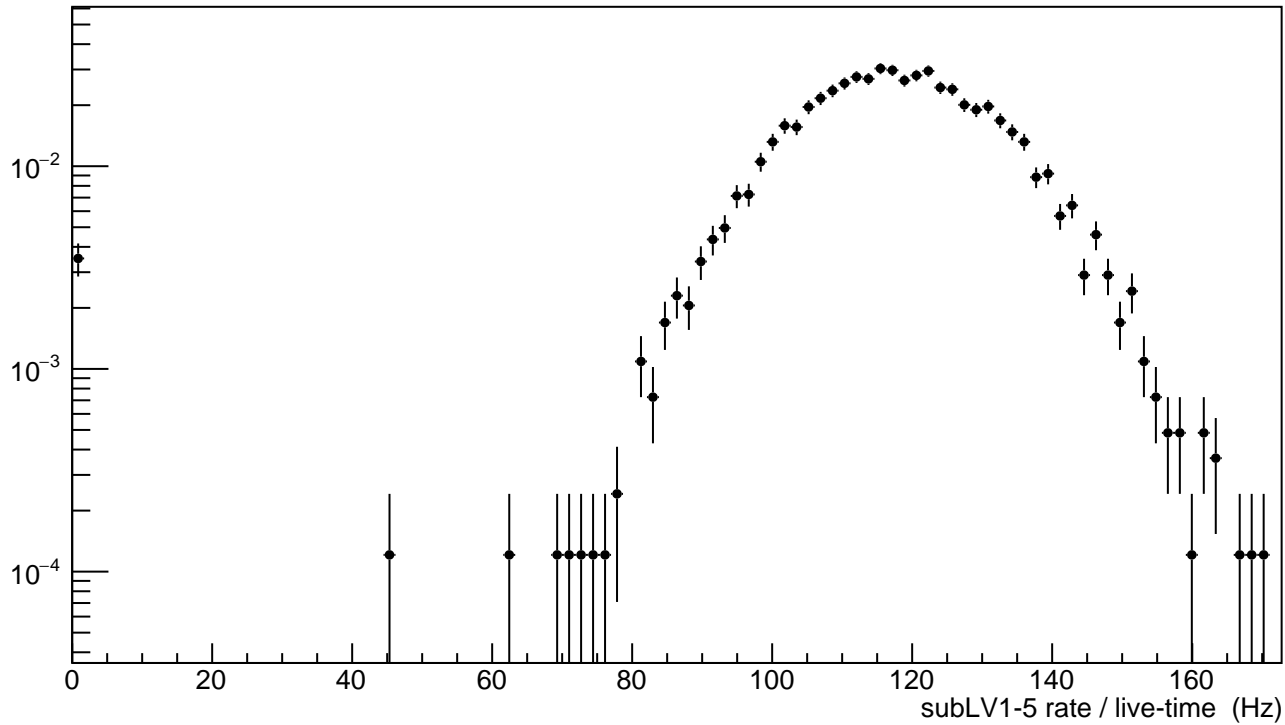

Supplement: s1 [file s1]

probability density

$10^{-1}$

0

10

20

30

40

50

60

70

80

90

100

live-time (%)

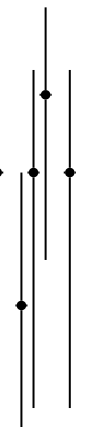

Supplement: s1 [file s1]

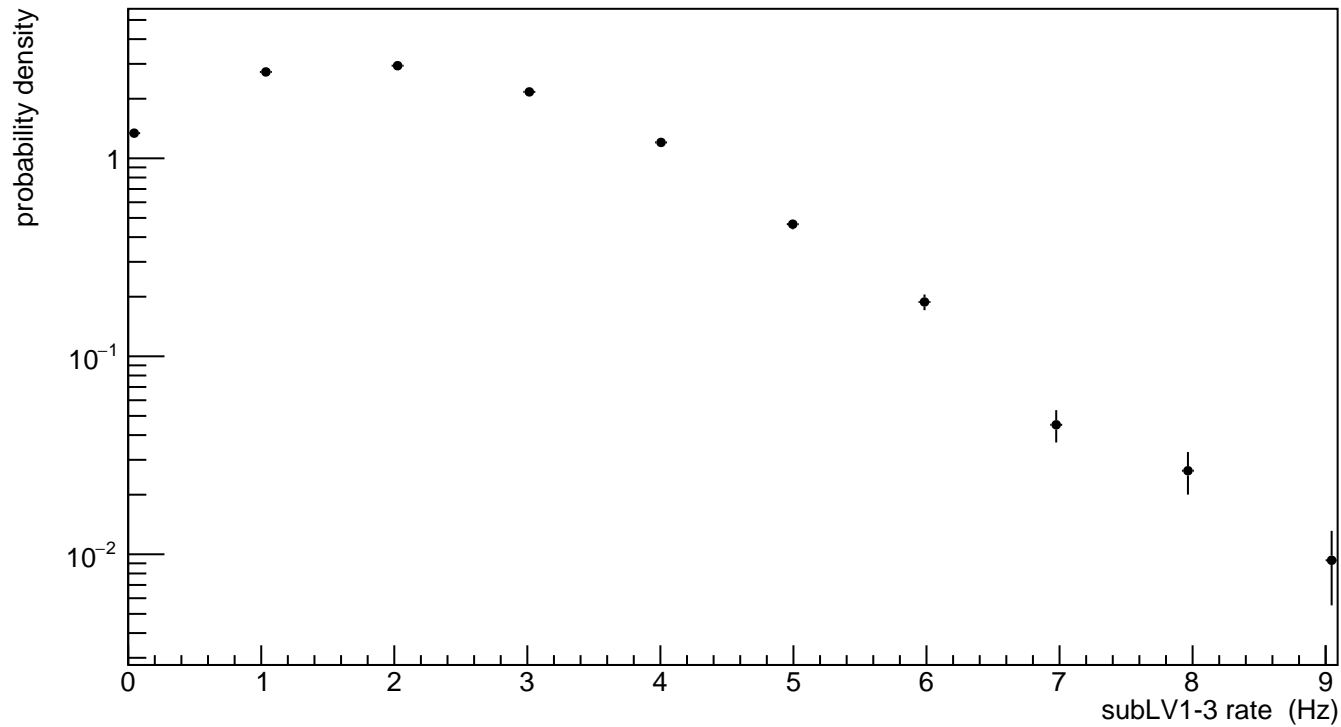

Supplement: s1 [file s1]

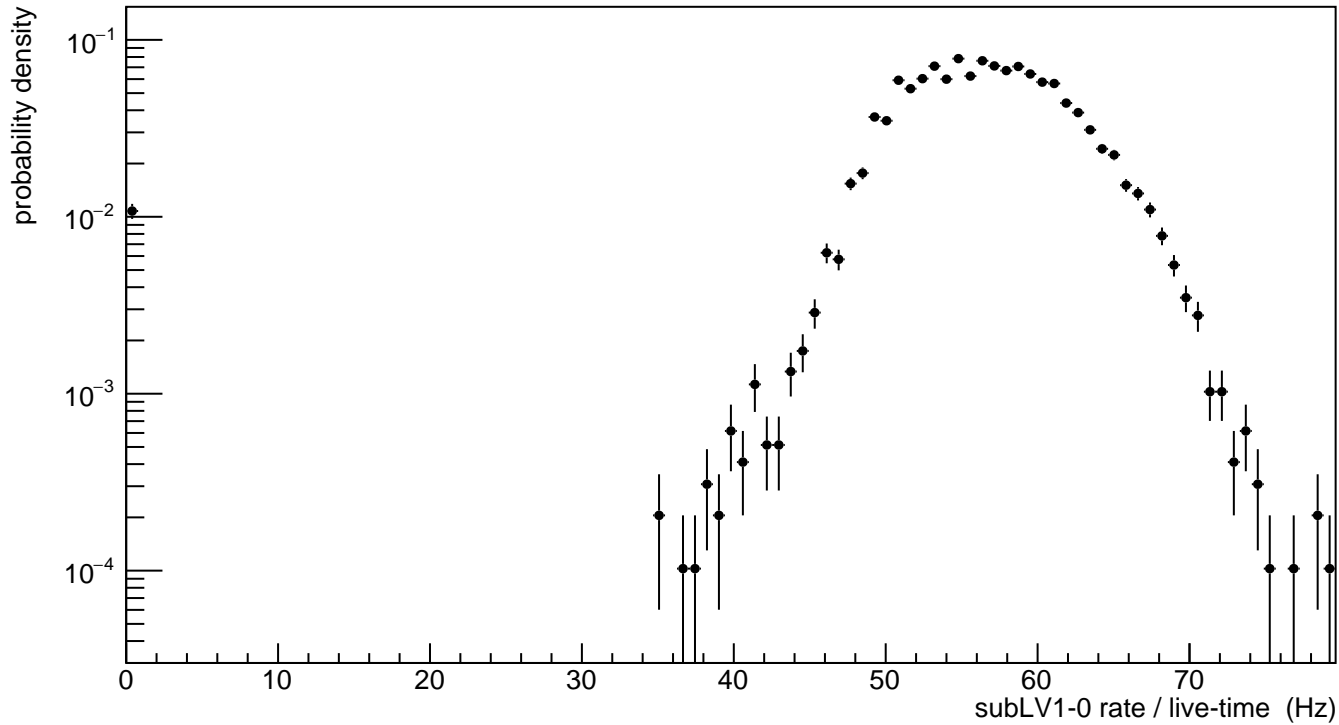

Supplement: s1 [file s1]

probability density

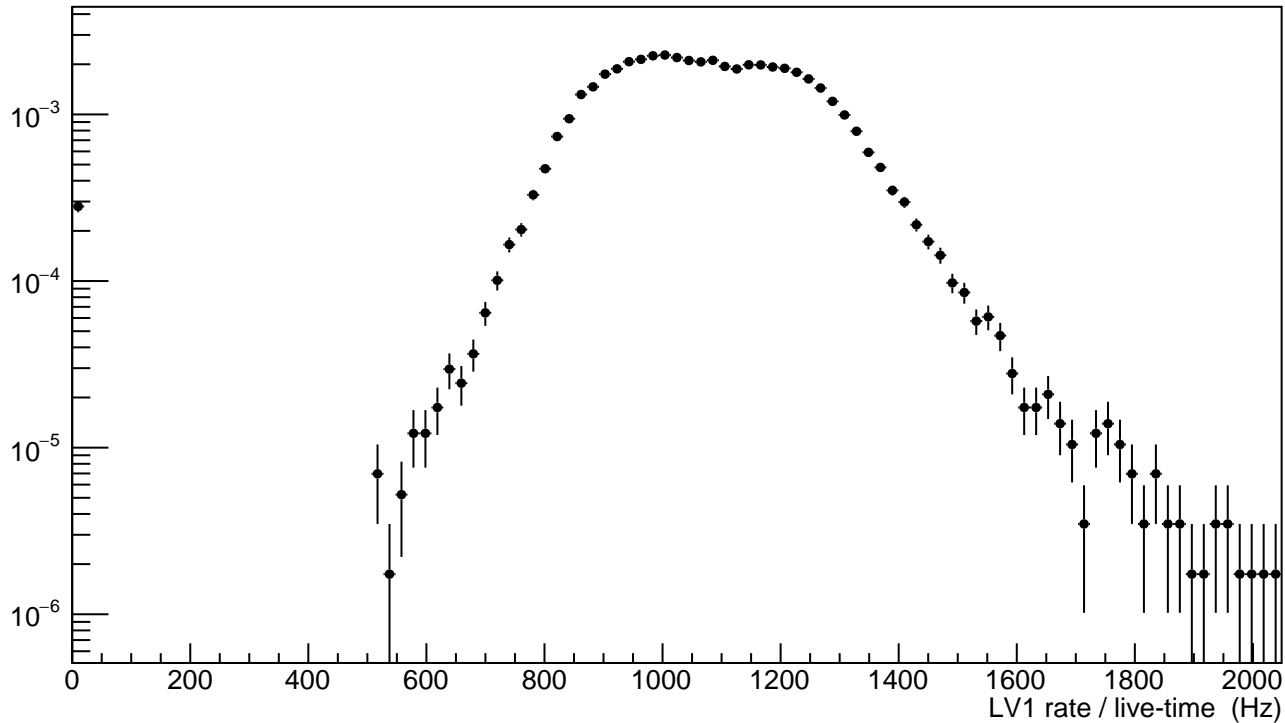

Supplement: s1 [file s1]

probability density

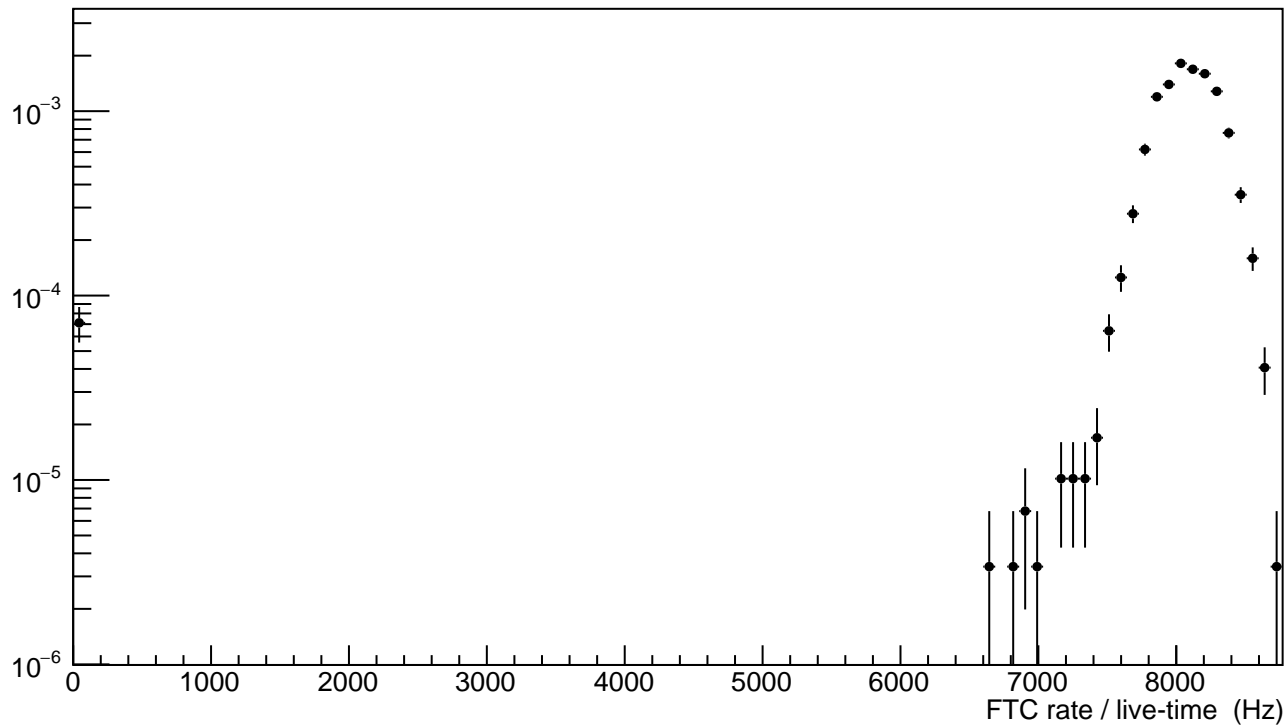

Supplement: s1 [file s1]

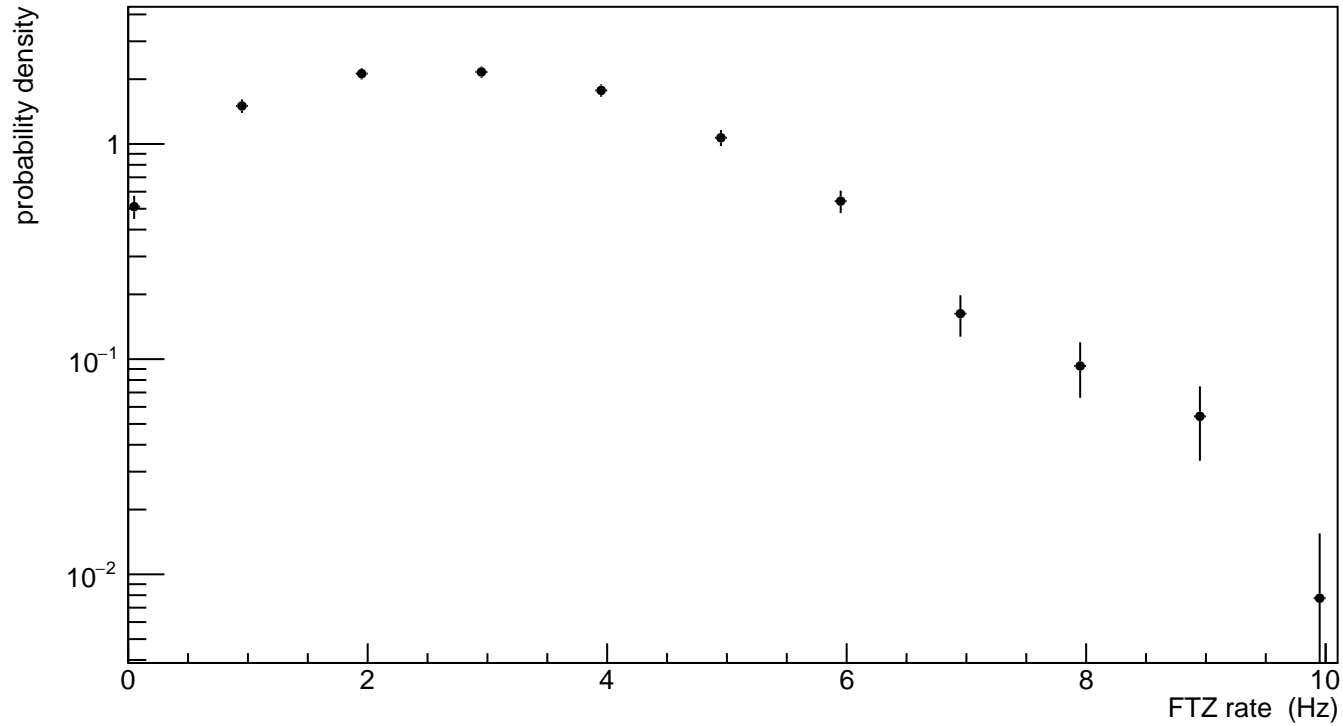

Supplement: s1 [file s1]

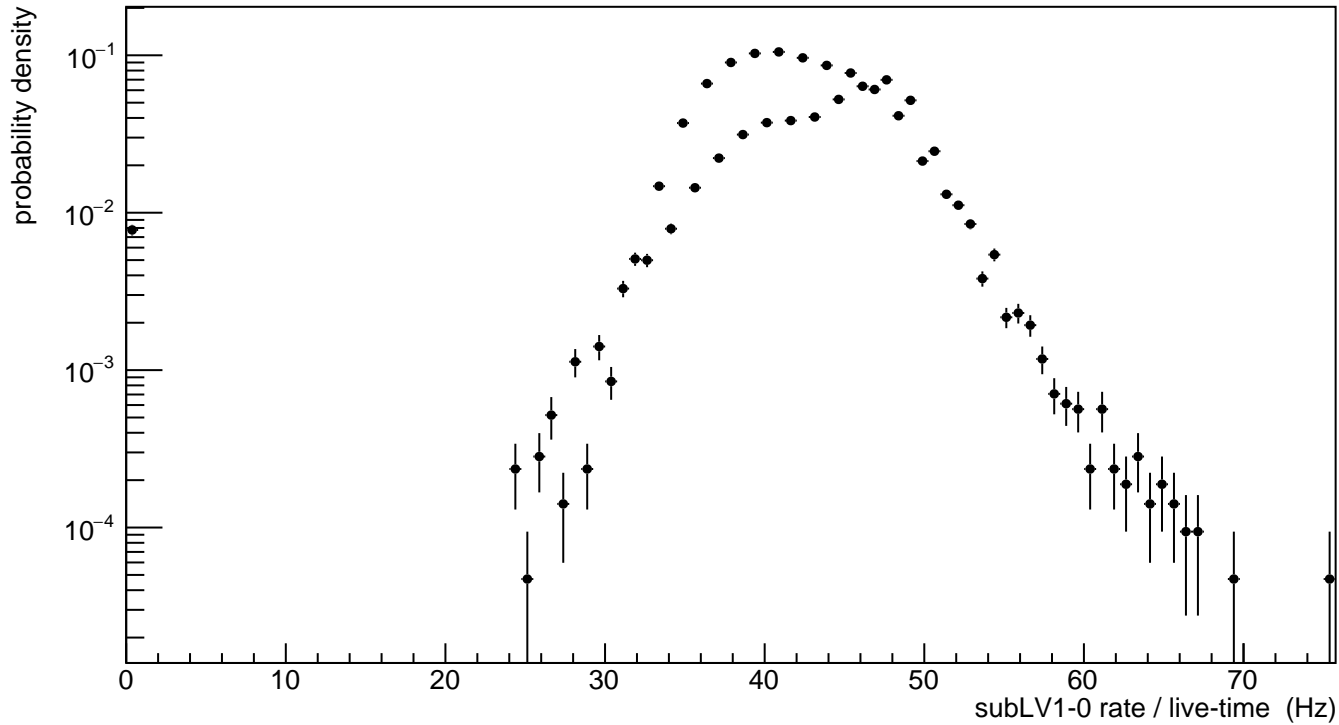

Supplement: s1 [file s1]

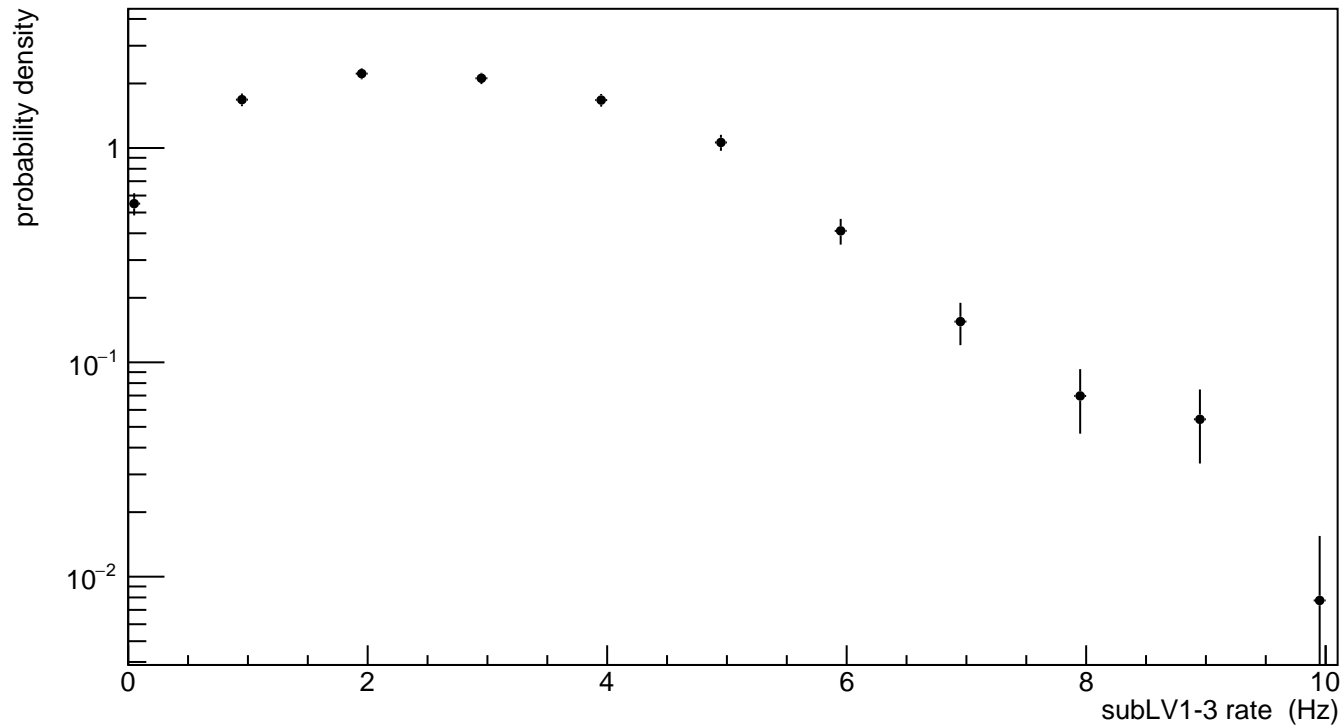

Supplement: s1 [file s1]

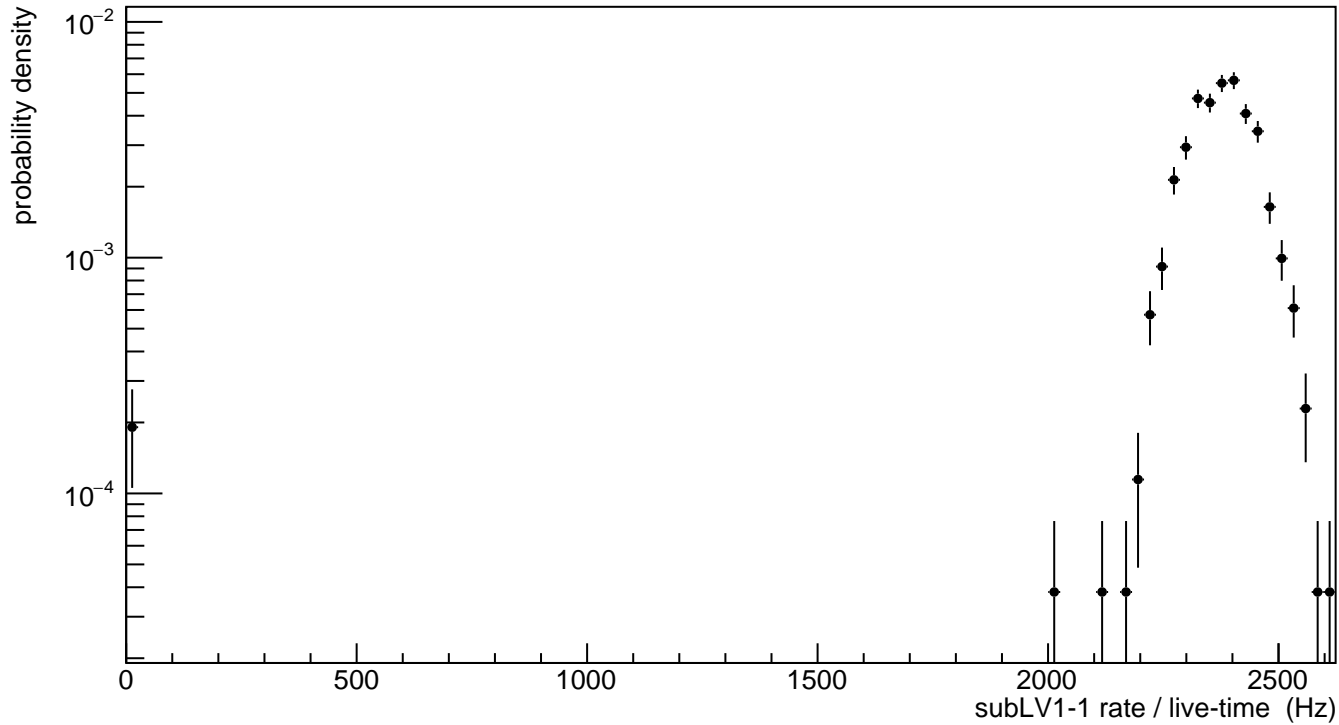

Supplement: s1 [file s1]

probability density

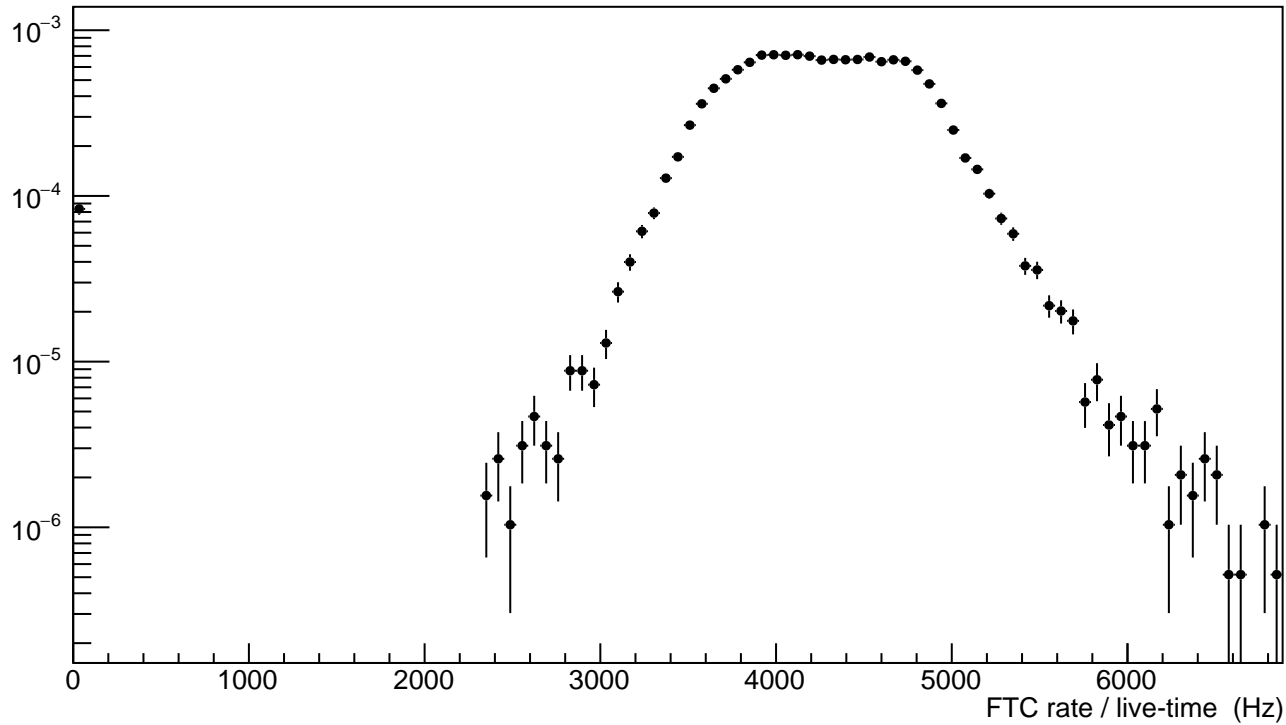

Supplement: s1 [file s1]

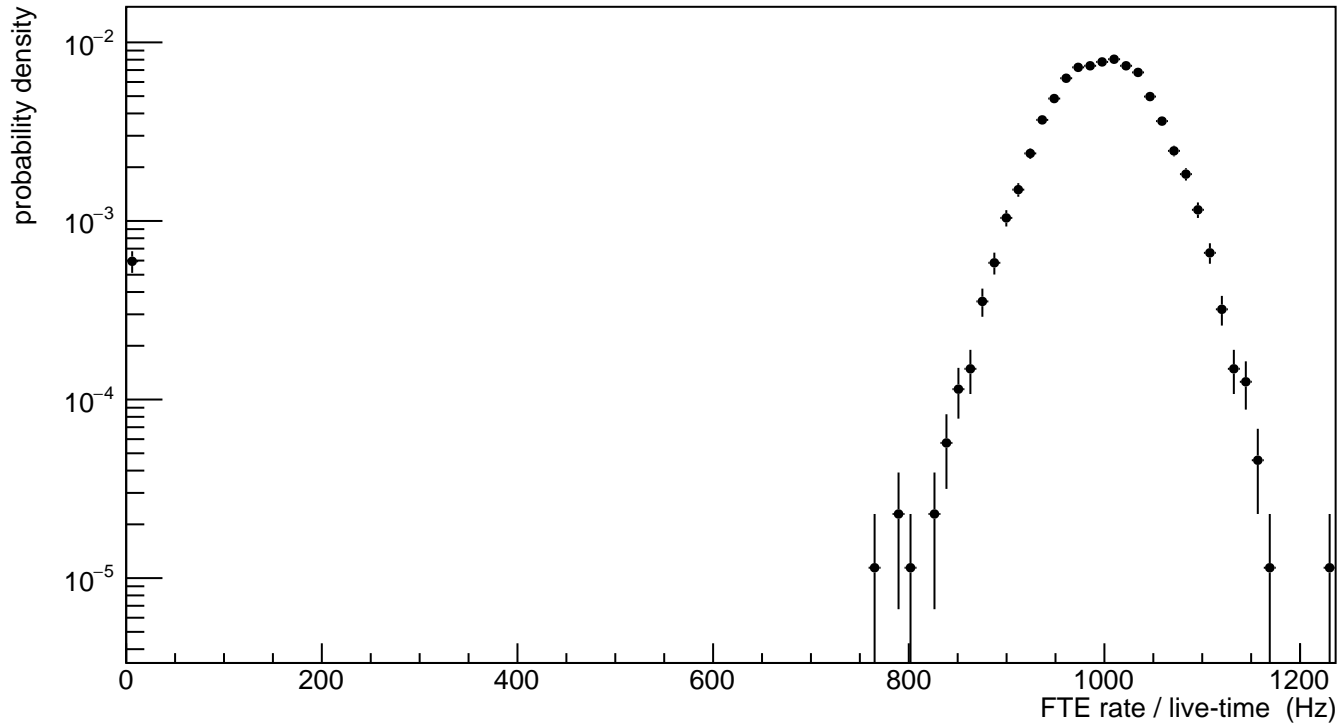

Supplement: s1 [file s1]

probability density

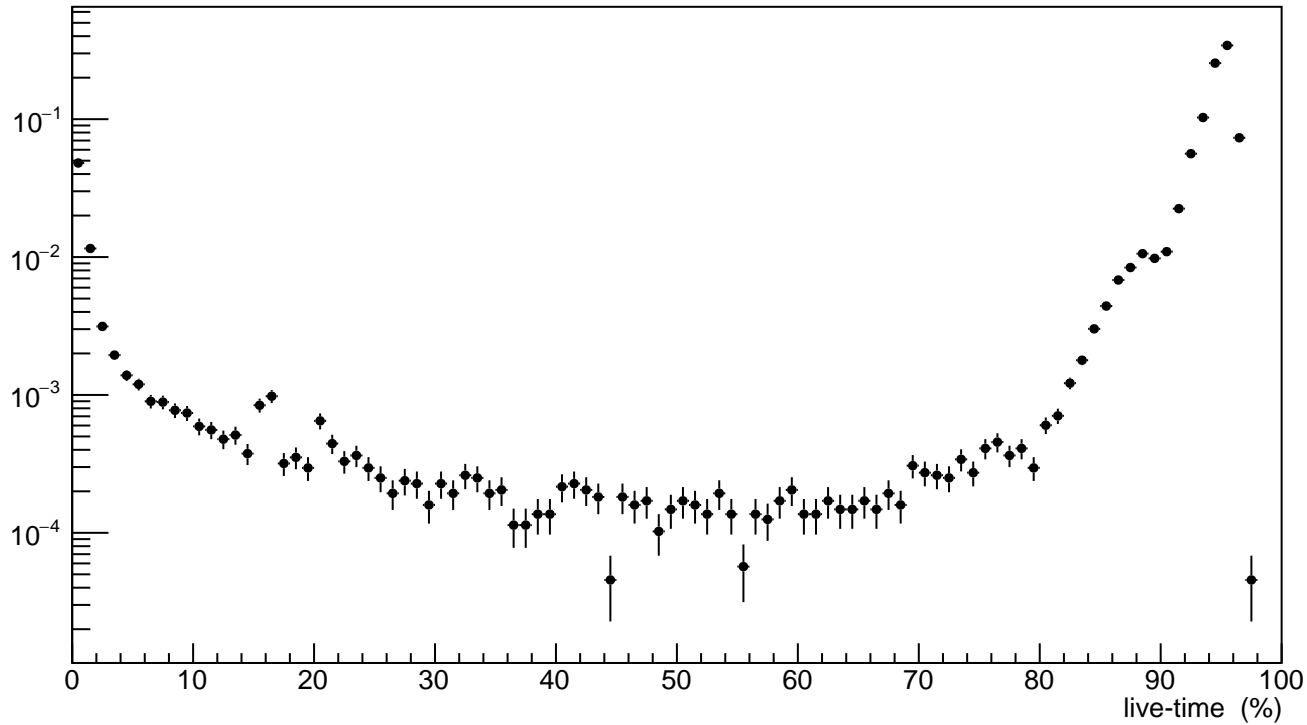

Supplement: s1 [file s1]

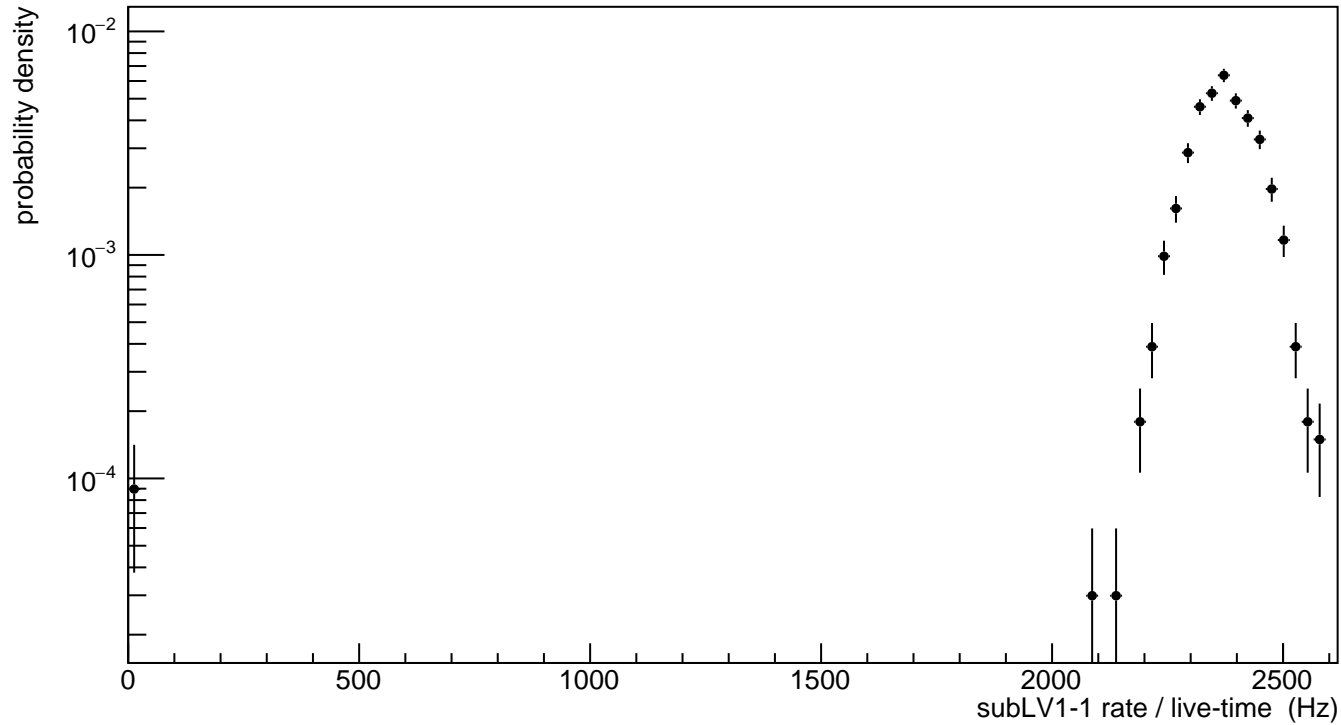

Supplement: s1 [file s1]

probability density

$10^{-3}$

$10^{-4}$

$10^{-5}$

$10^{-6}$

0

1000

2000

3000

4000

5000

6000

7000

FT rate / live-time (Hz)

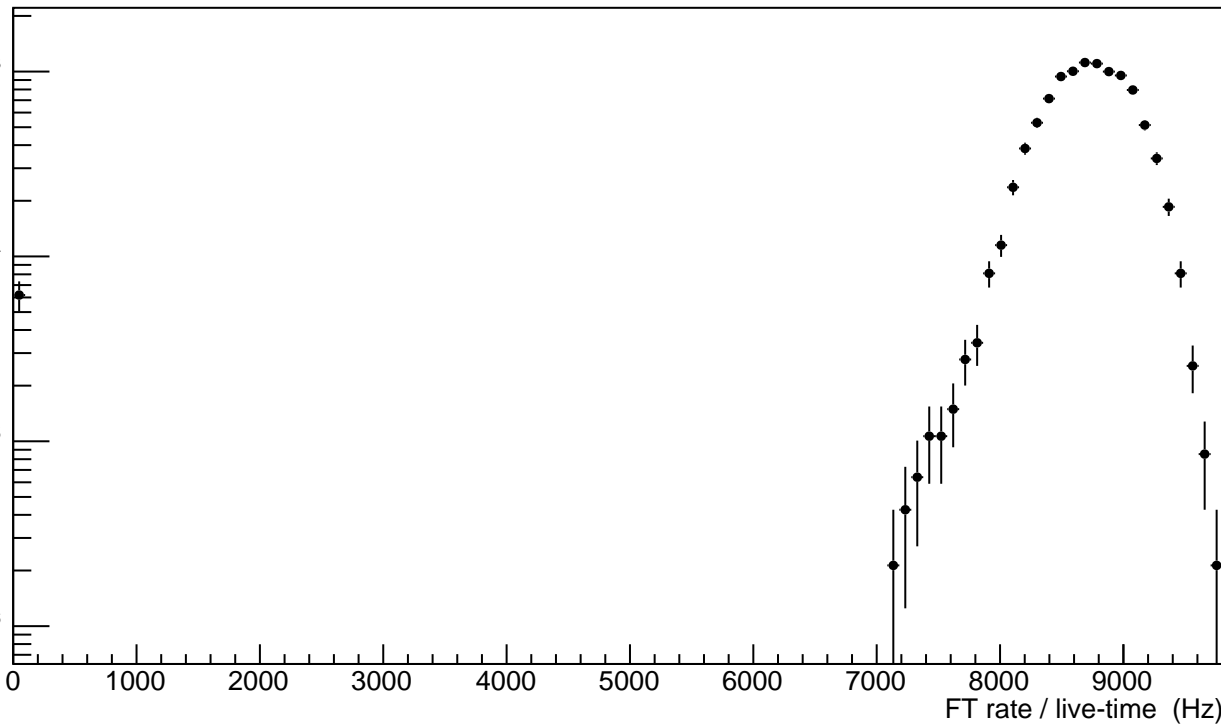

Supplement: s1 [file s1]

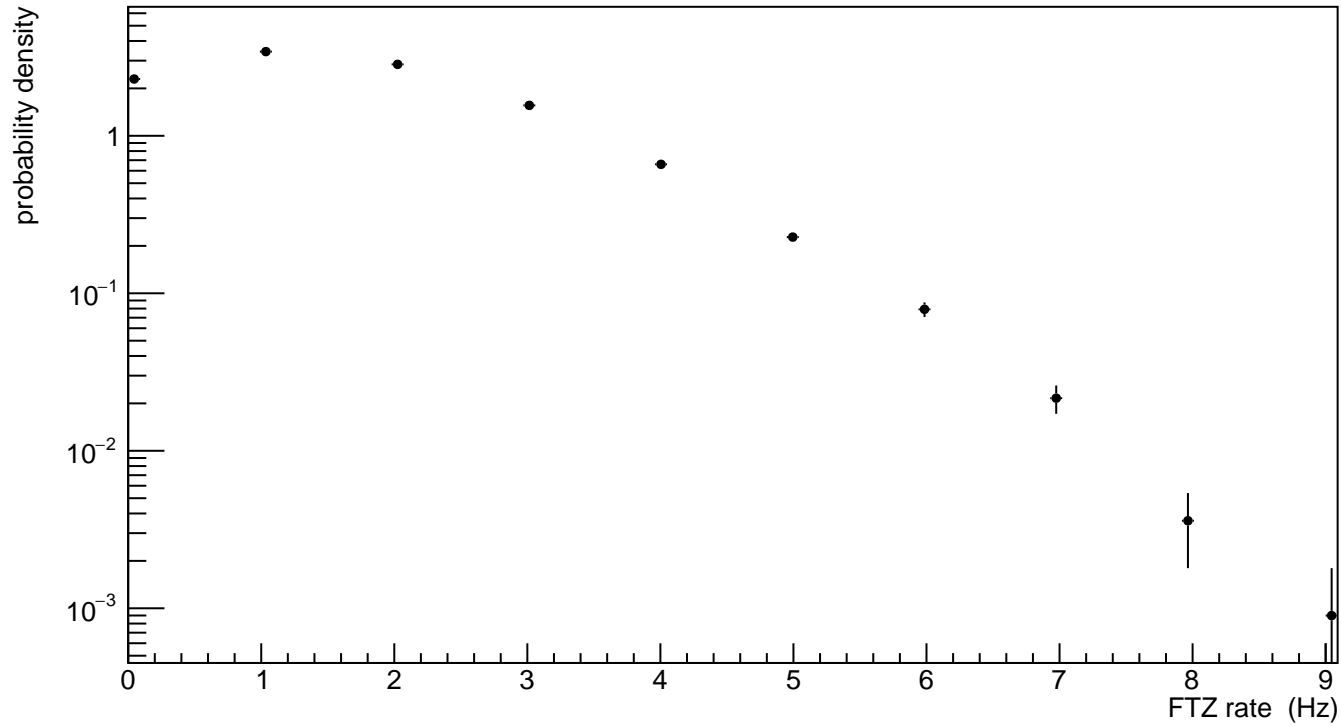

Supplement: s1 [file s1]

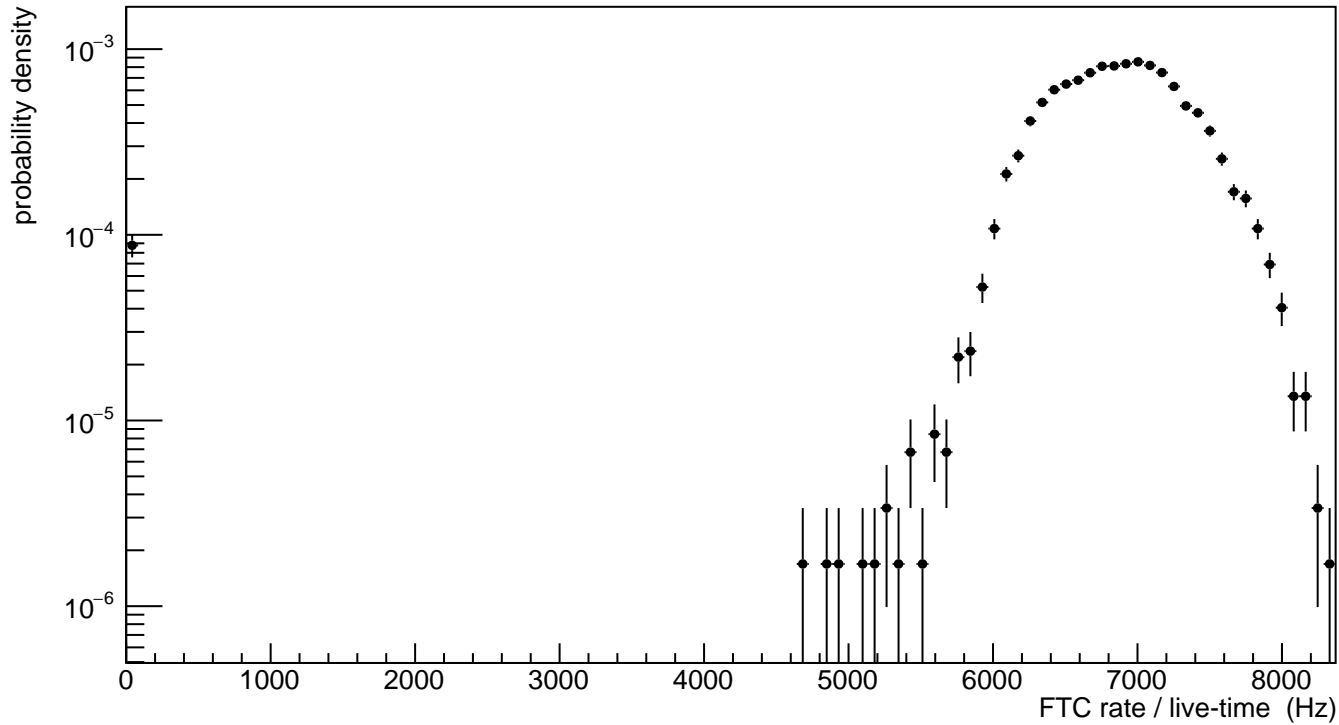

Supplement: s1 [file s1]

probability density

$10^{-2}$

$10^{-3}$

0

20

40

60

80

100

120

140

160

subLV1-5 rate / live-time (Hz)

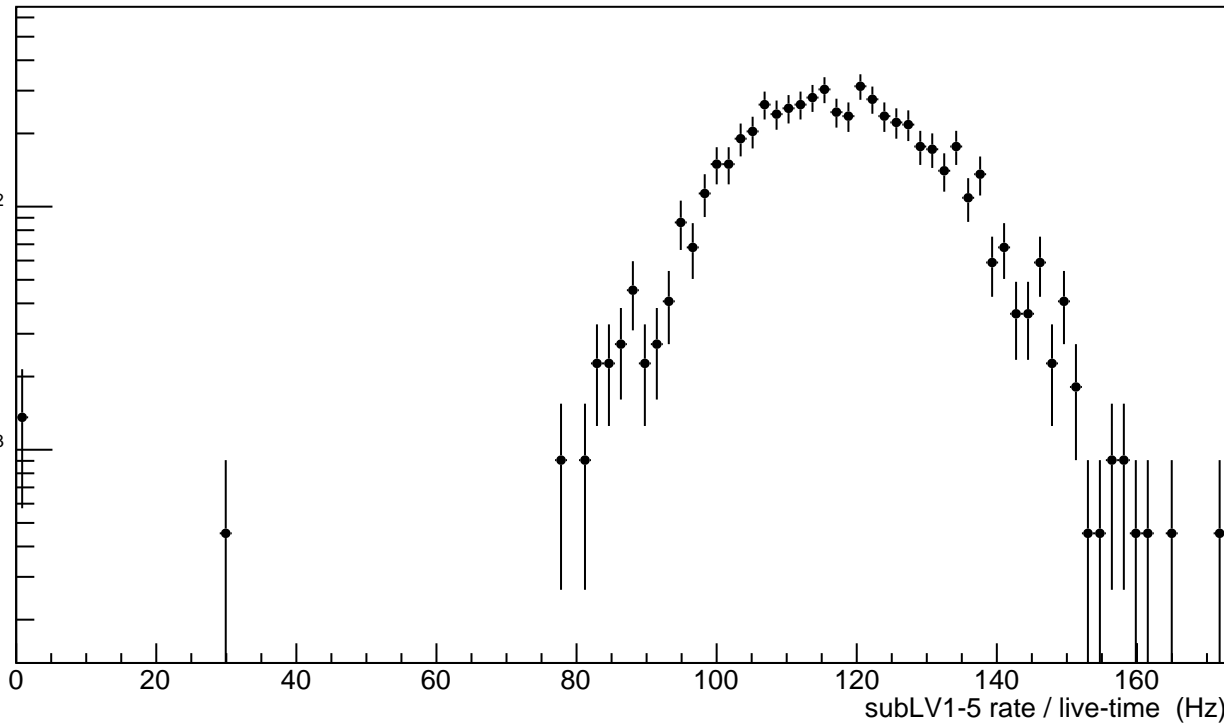

Supplement: s1 [file s1]

probability density

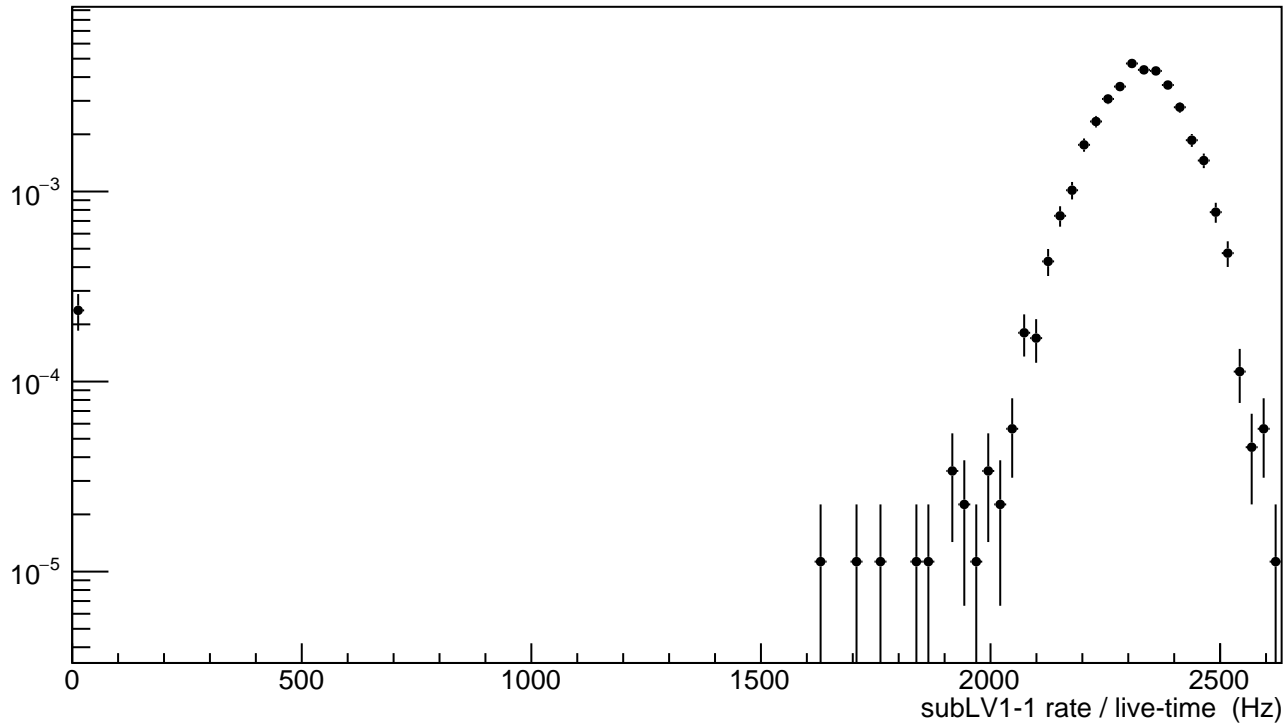

Supplement: s1 [file s1]

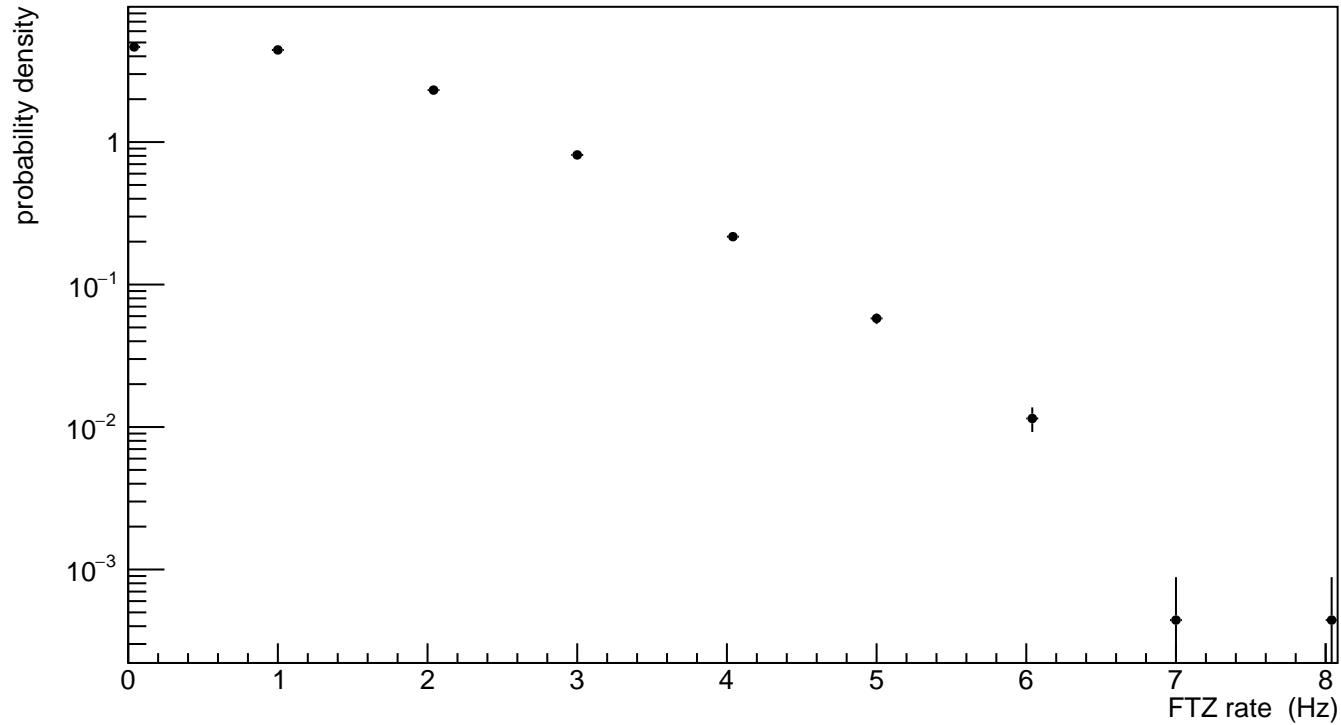

Supplement: s1 [file s1]

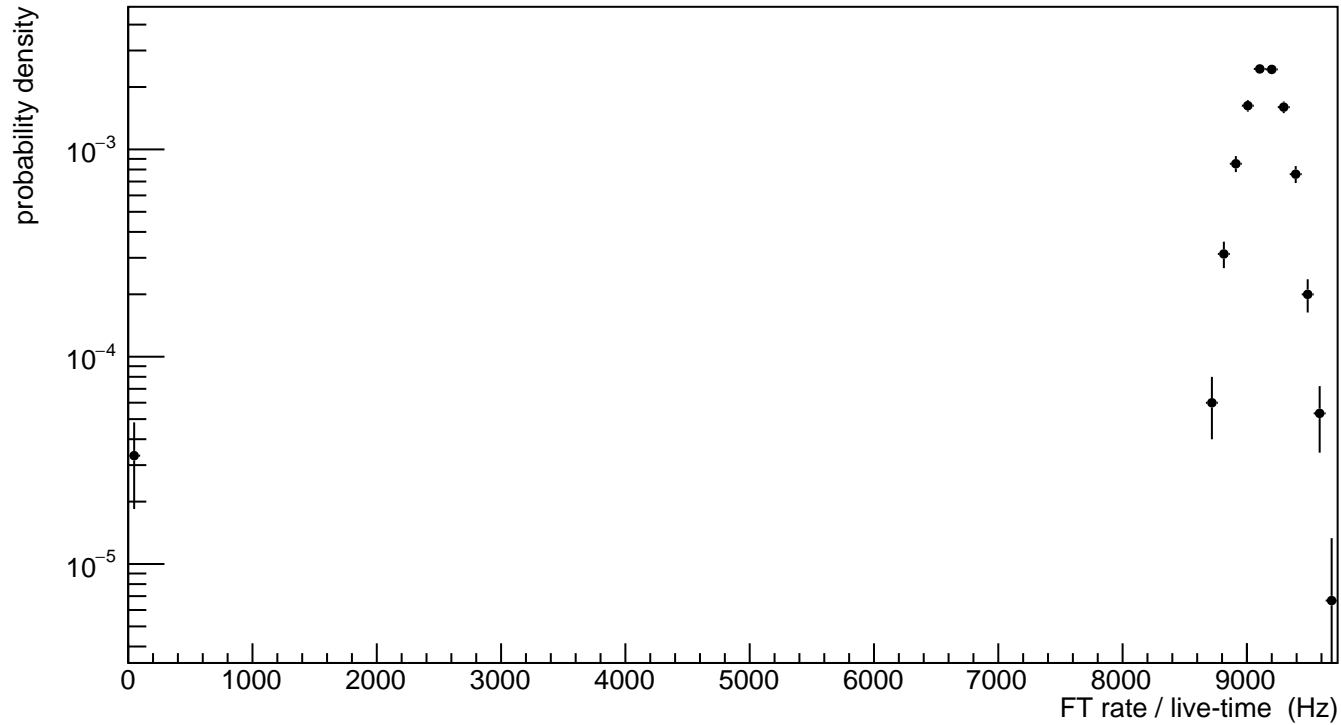

Supplement: s1 [file s1]

probability density

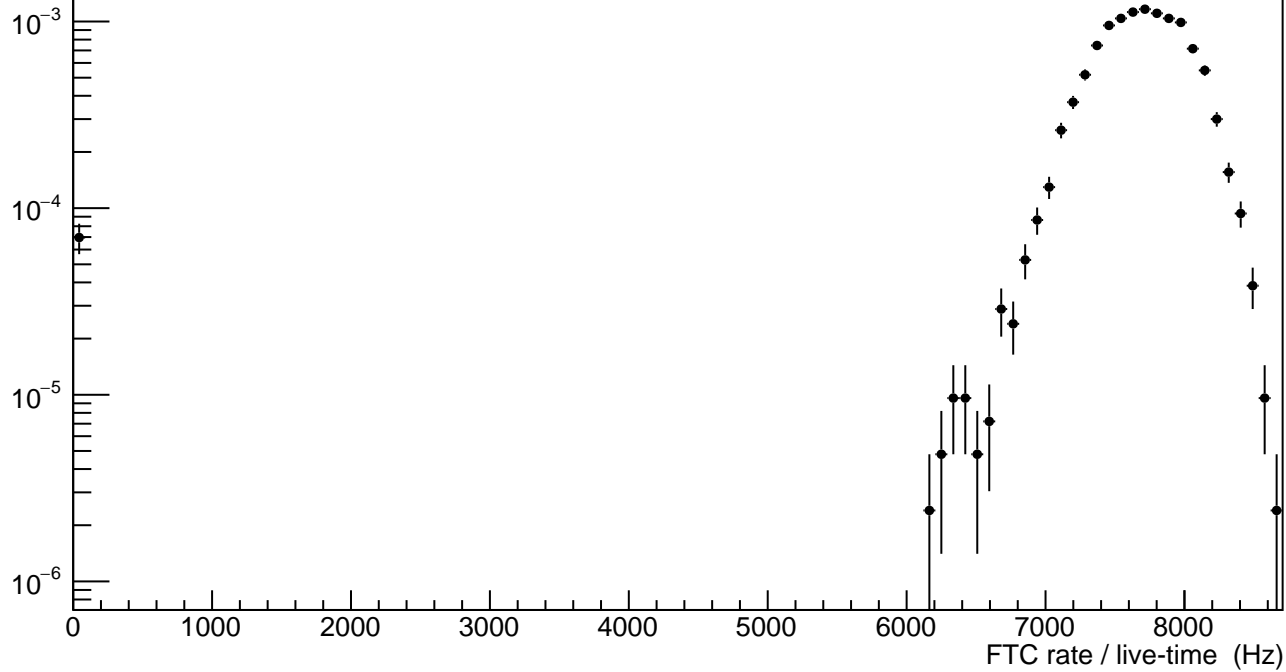

Supplement: s1 [file s1]

probability density

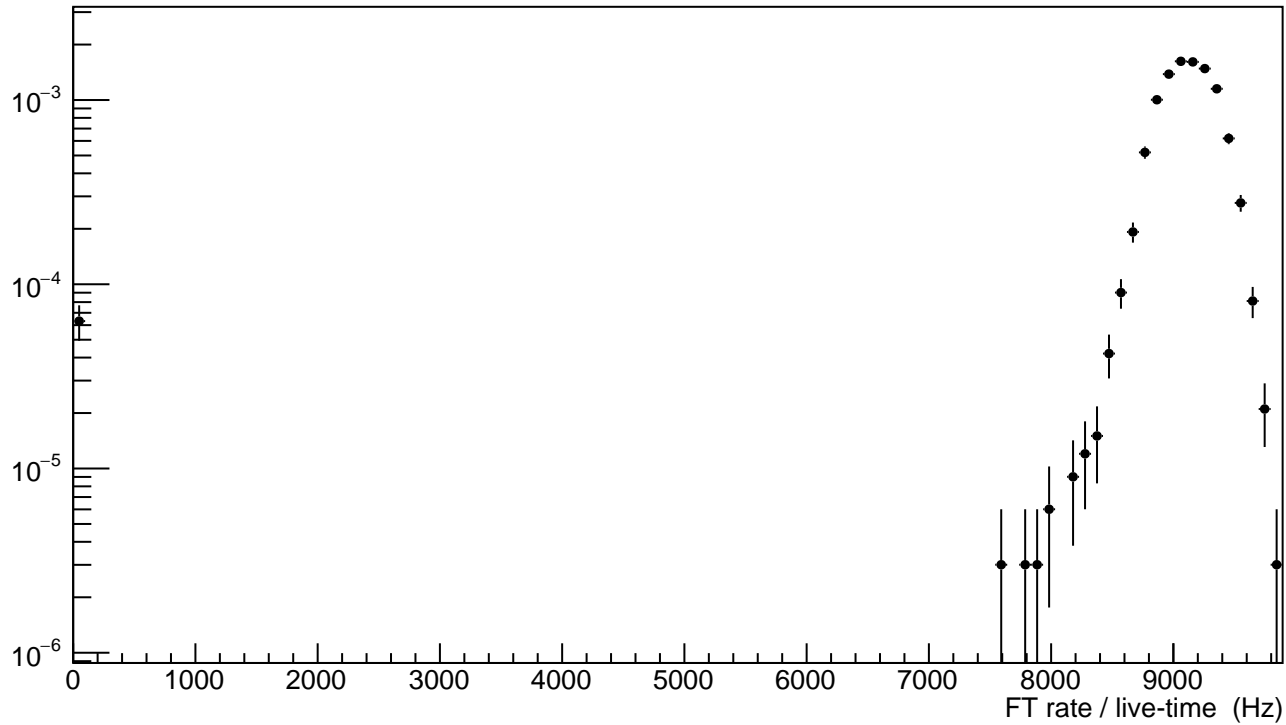

Supplement: s1 [file s1]

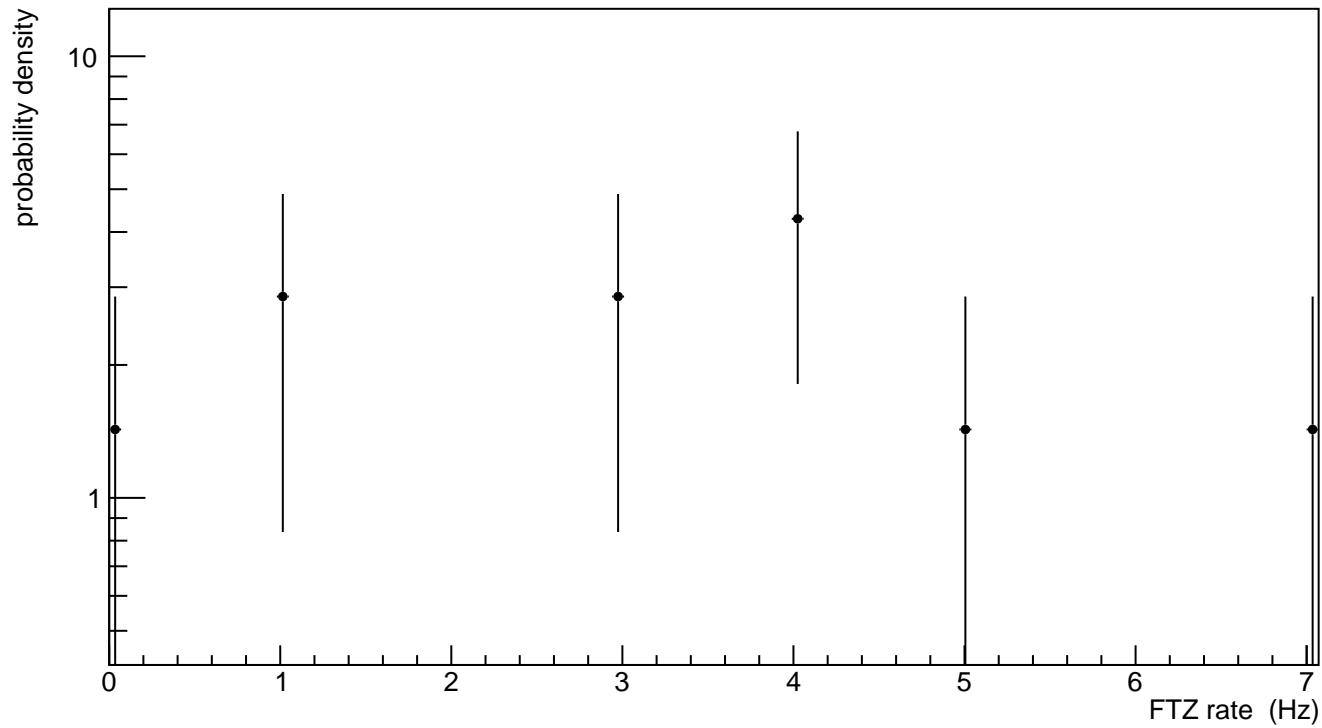

Supplement: s1 [file s1]

probability density

$10^{-2}$

0

500

1000

1500

2000

2500

LV1 rate / live-time (Hz)

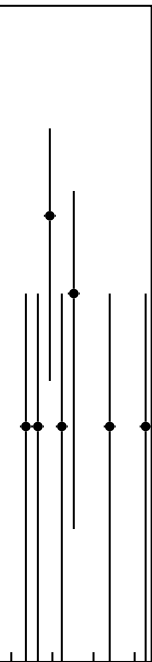

Supplement: s1 [file s1]

probability density

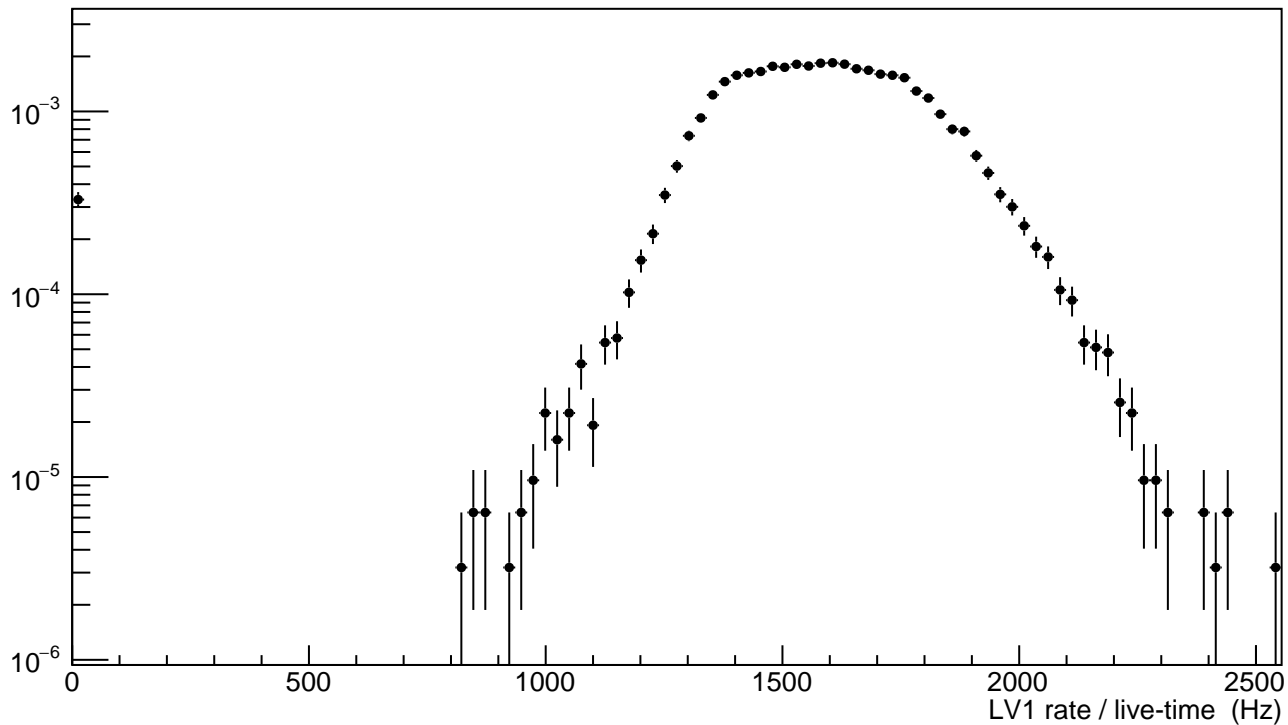

Supplement: s1 [file s1]

probability density

$10^{-3}$

$10^{-4}$

$10^{-5}$

0

1000

2000

3000

4000

5000

6000

7000

8000

9000

FT rate / live-time (Hz)

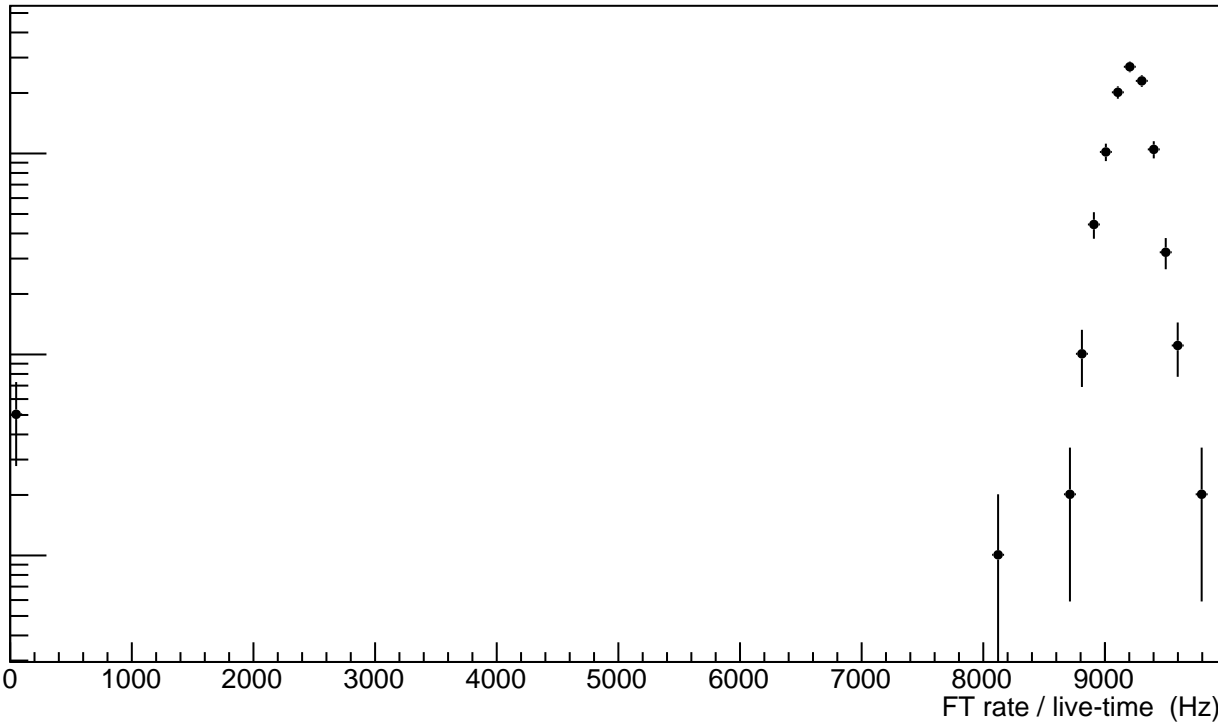

Supplement: s1 [file s1]

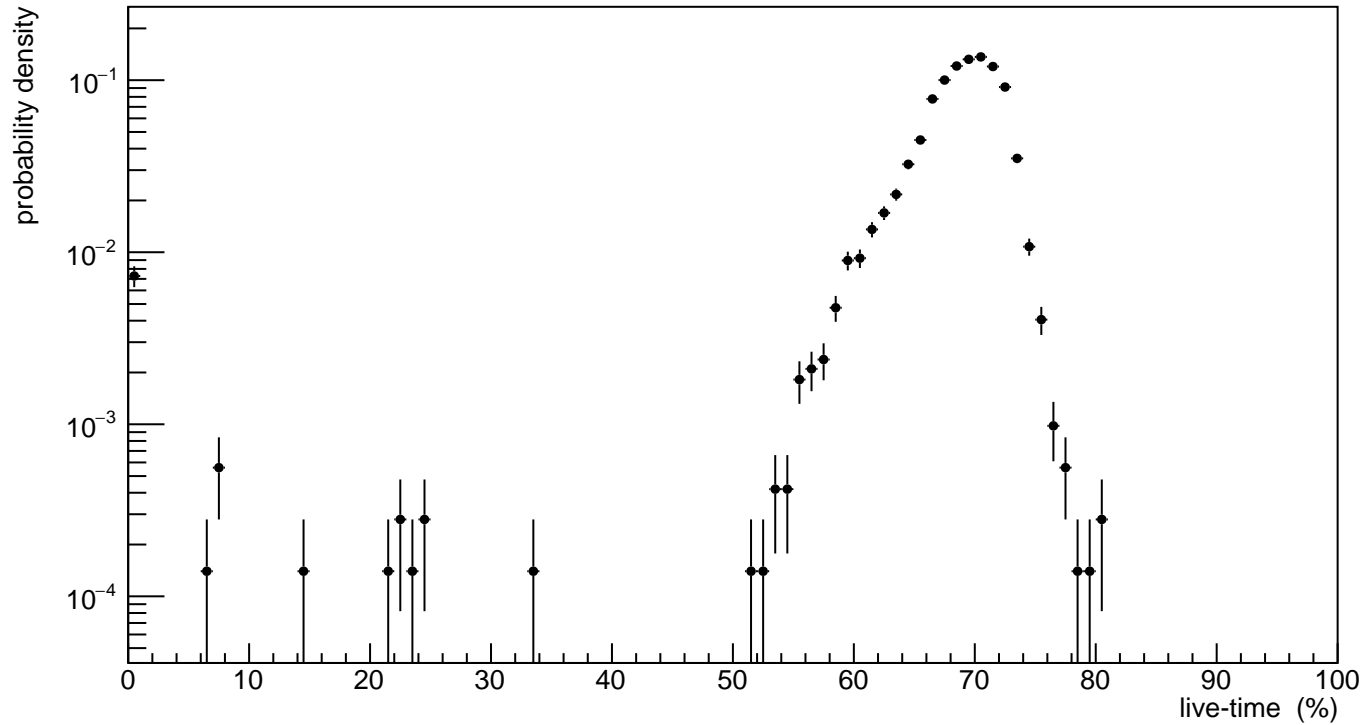

Supplement: s1 [file s1]

probability density

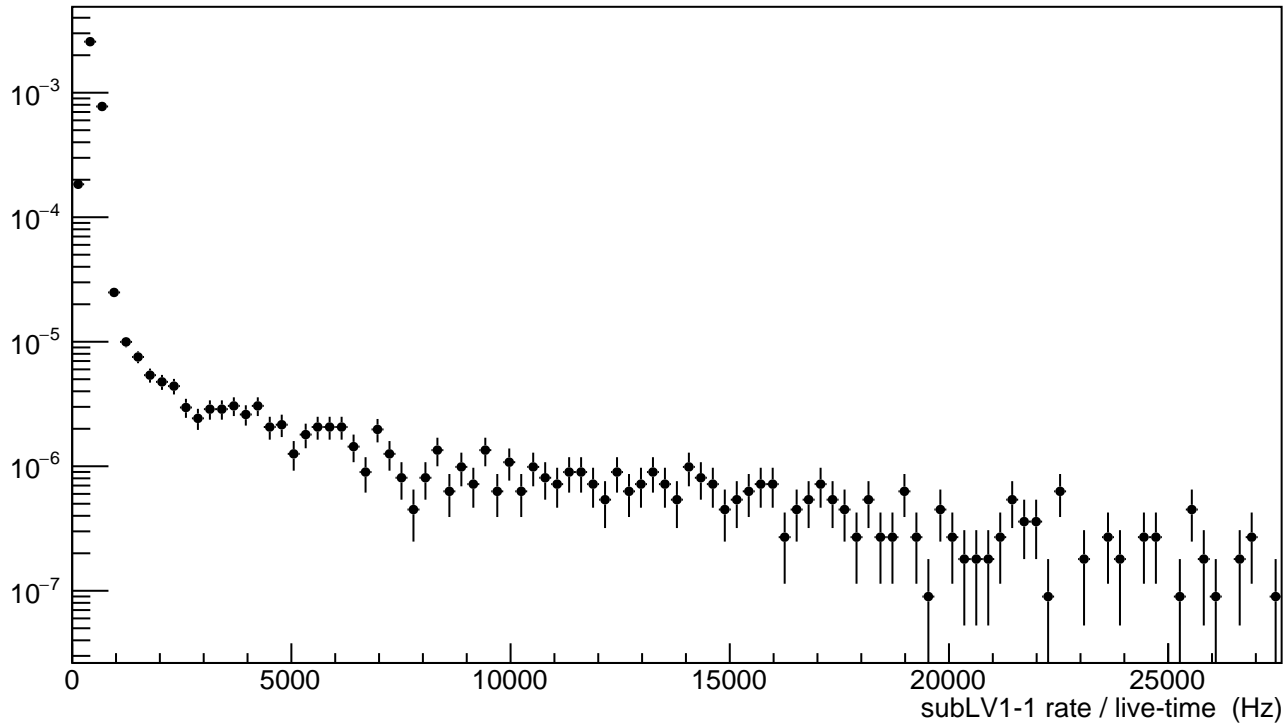

Supplement: s1 [file s1]

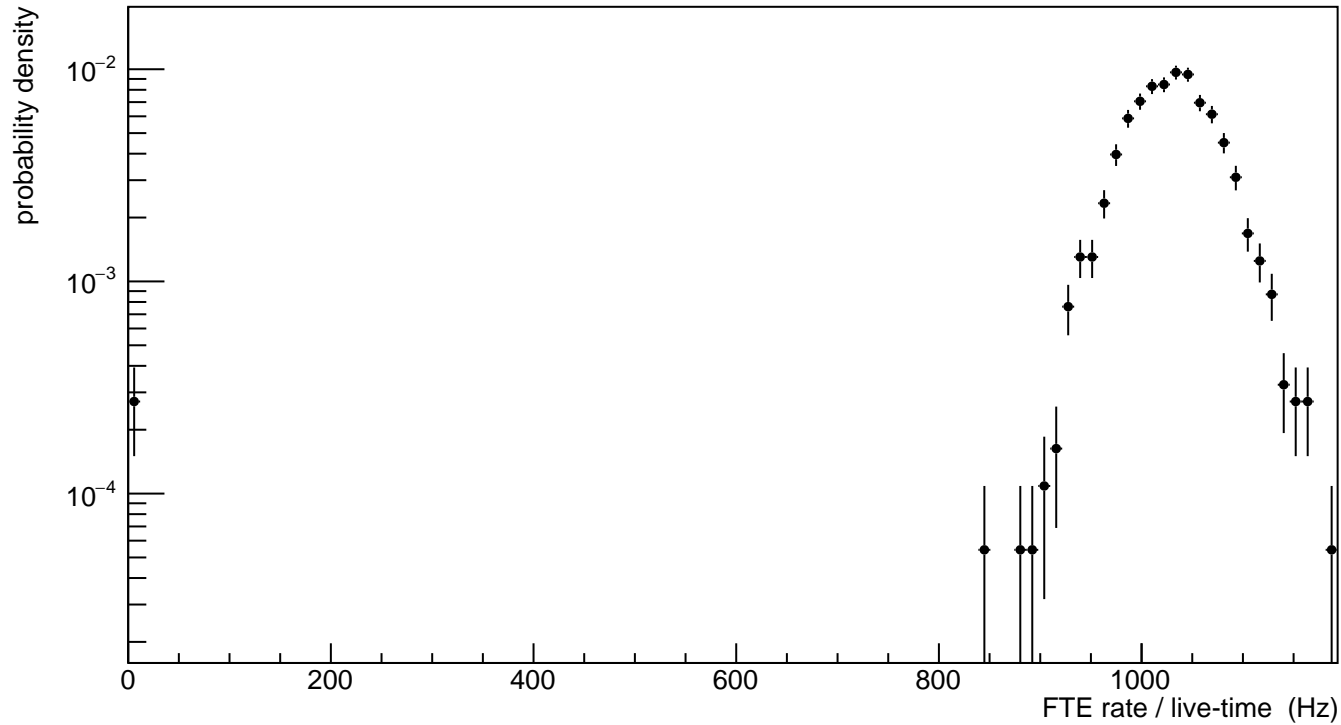

Supplement: s1 [file s1]

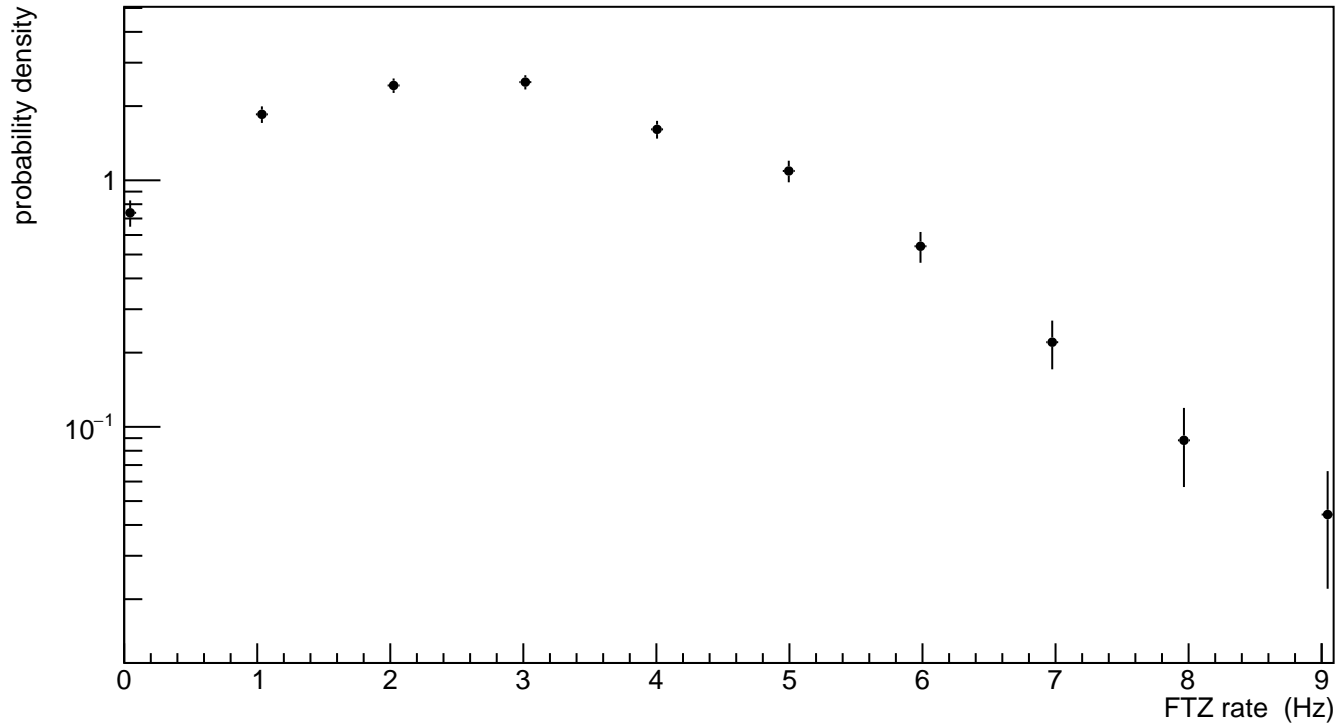

Supplement: s1 [file s1]

probability density

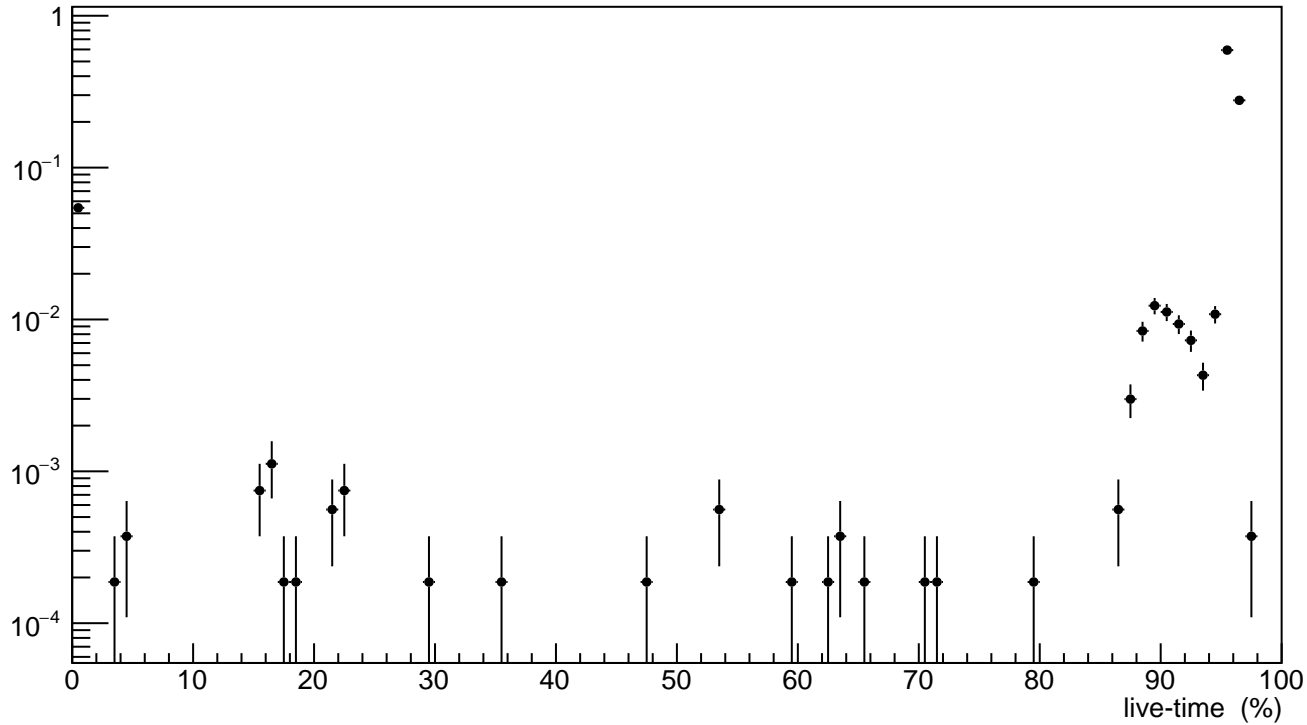

Supplement: s1 [file s1]

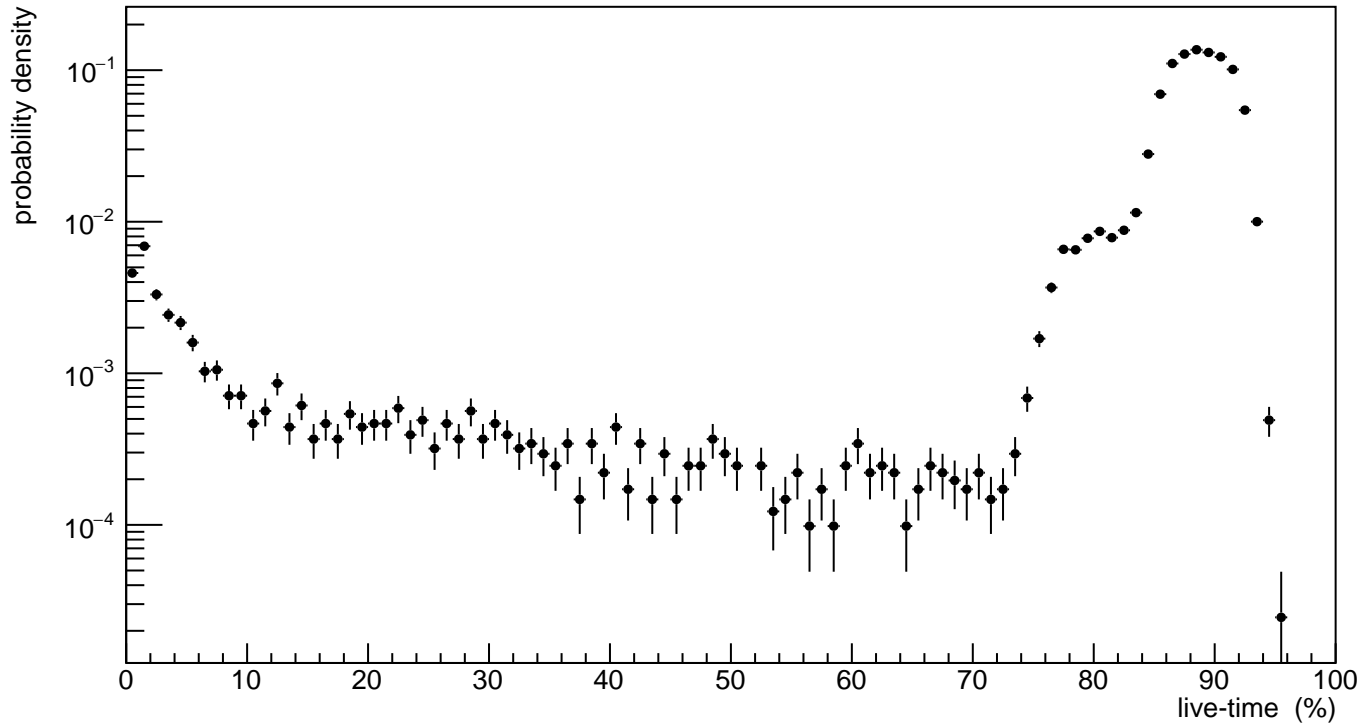

Supplement: s1 [file s1]

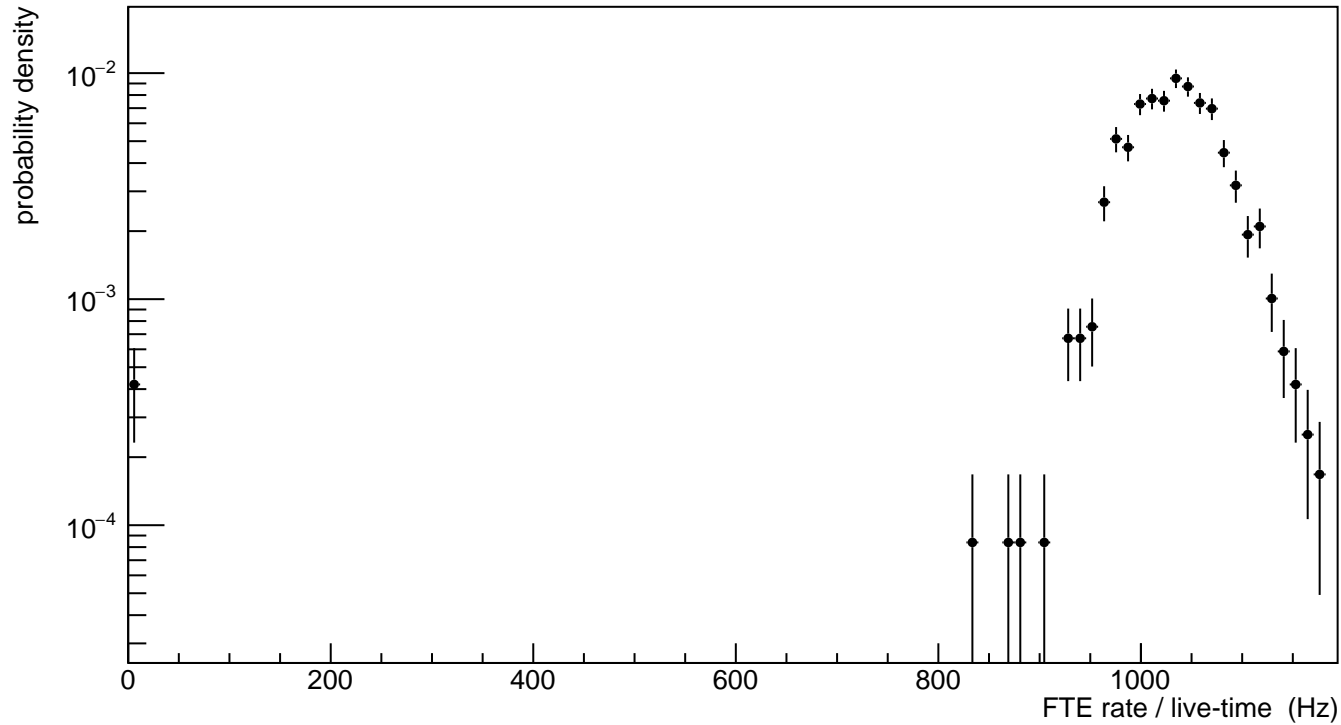

Supplement: s1 [file s1]

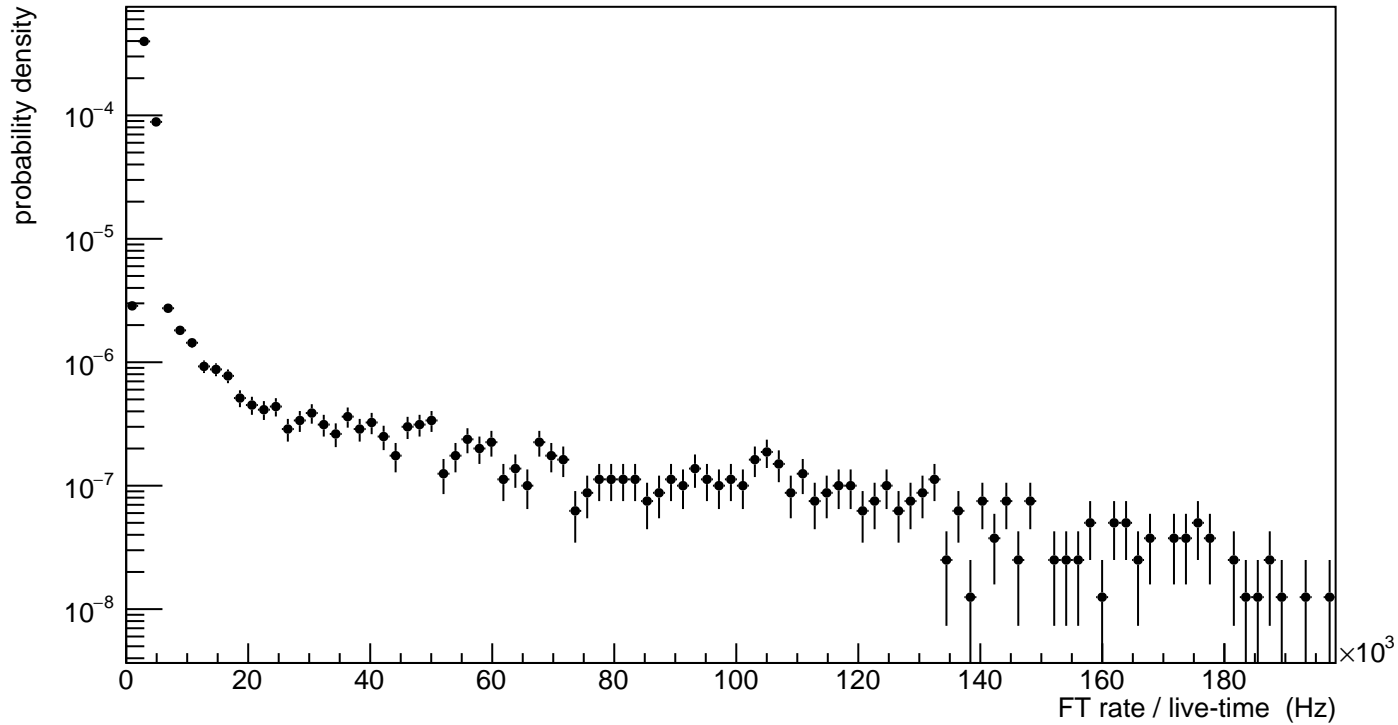

Supplement: s1 [file s1]

probability density

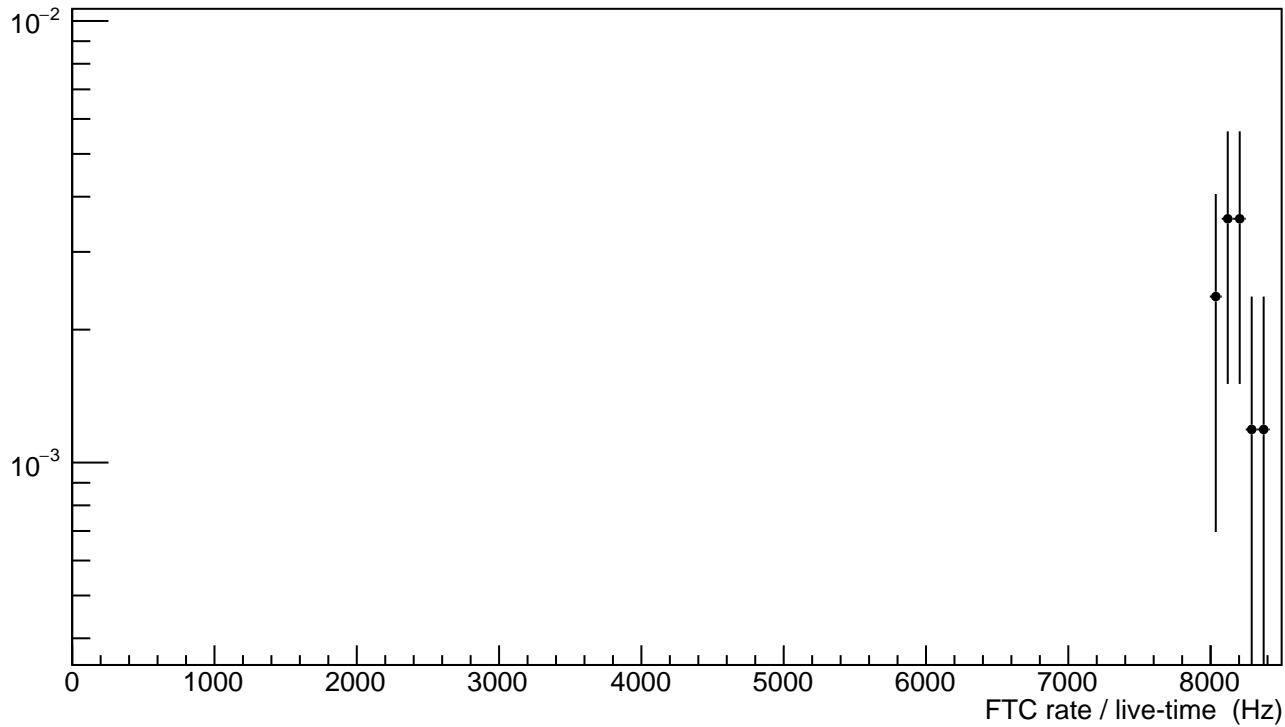

Supplement: s1 [file s1]

probability density

$10^{-1}$

$10^{-2}$

0

50

100

150

200

subLV1-2 rate / live-time (Hz)

250

300

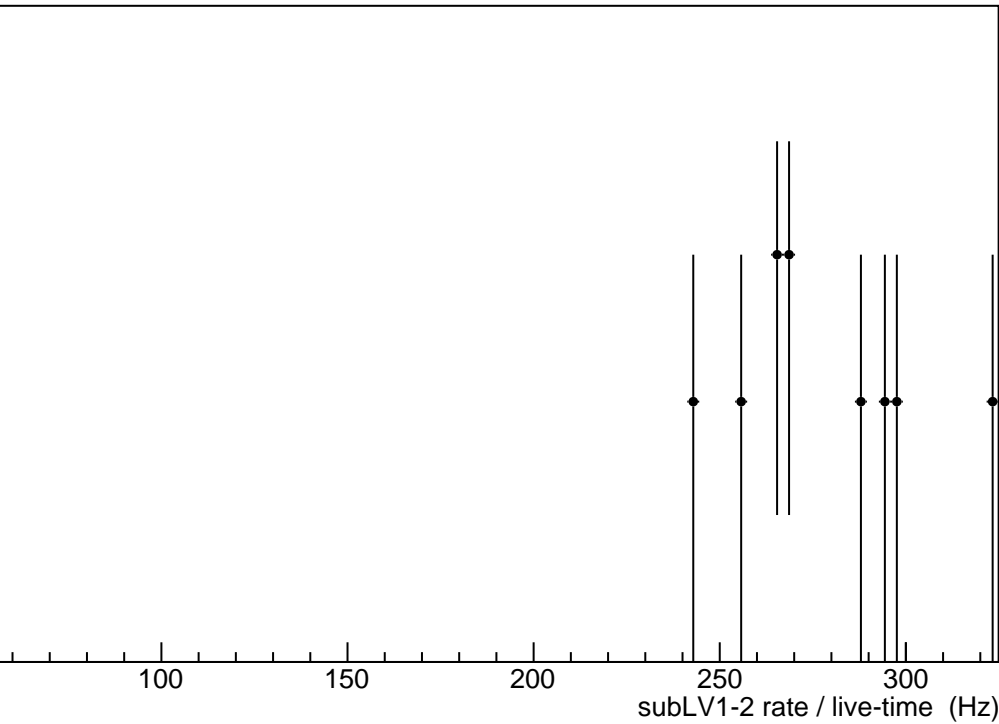

Supplement: s1 [file s1]

probability density

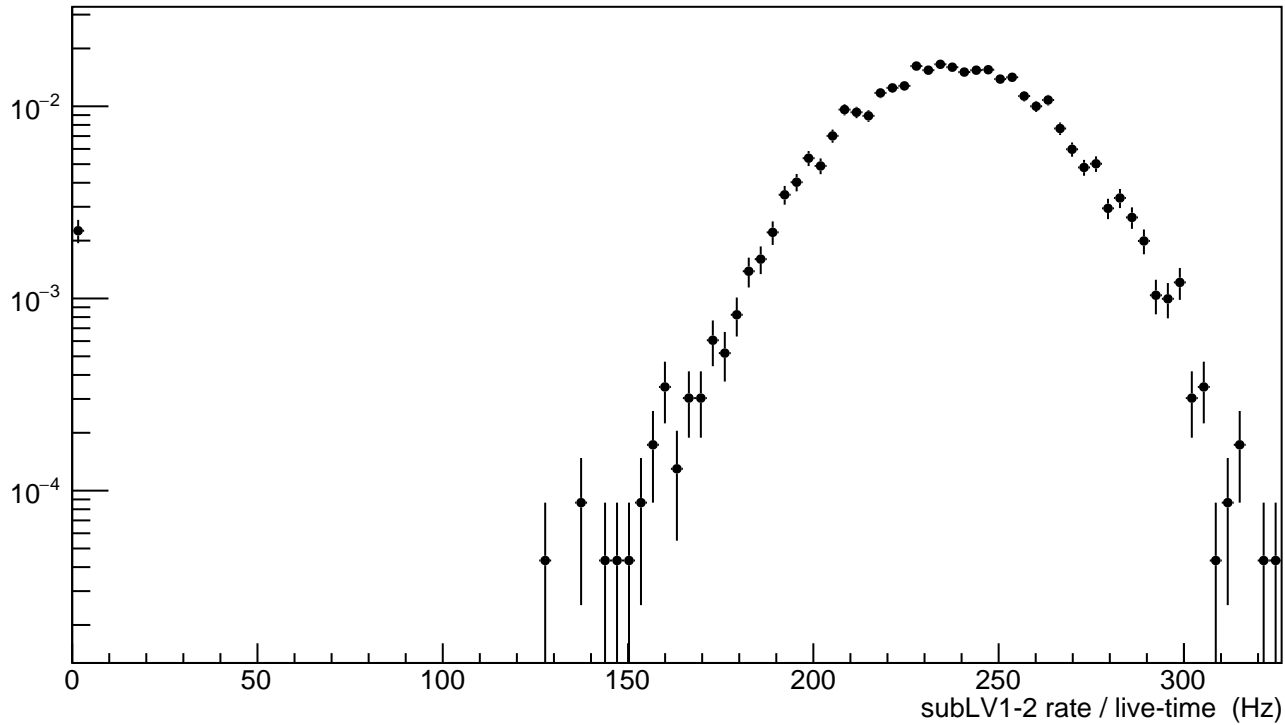

Supplement: s1 [file s1]

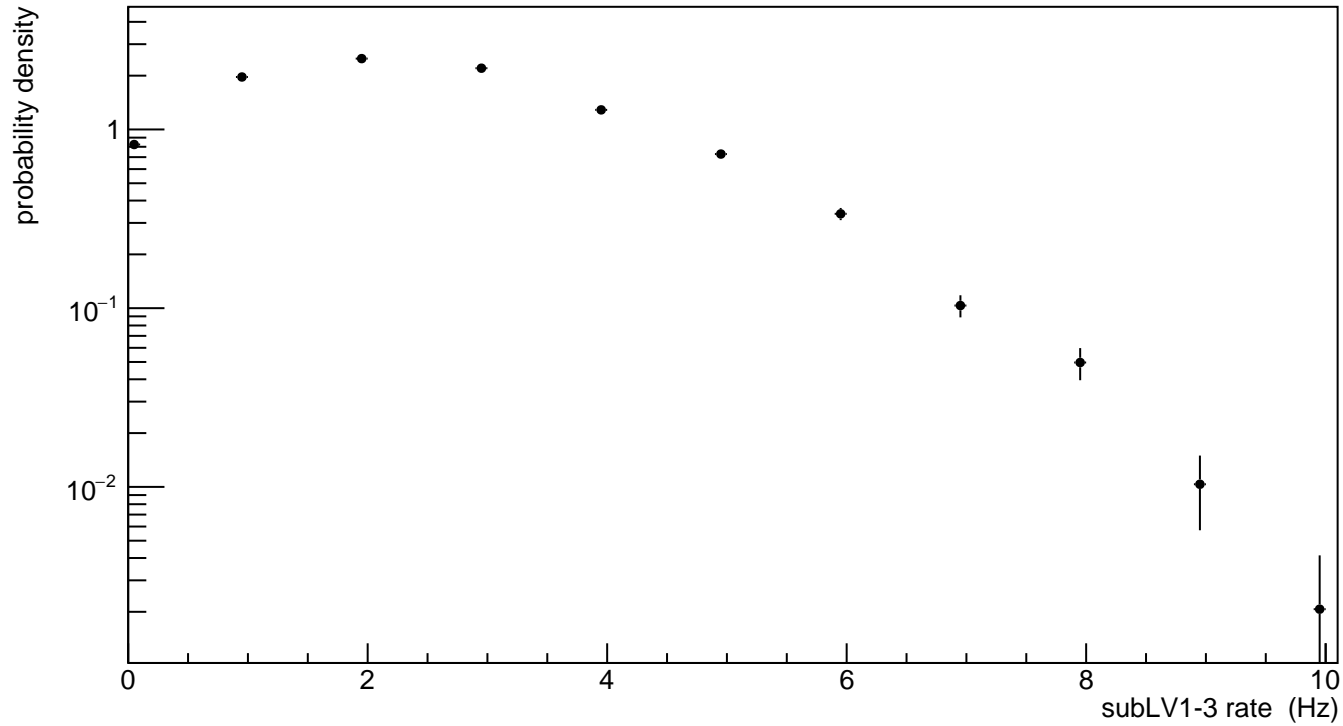

Supplement: s1 [file s1]

probability density

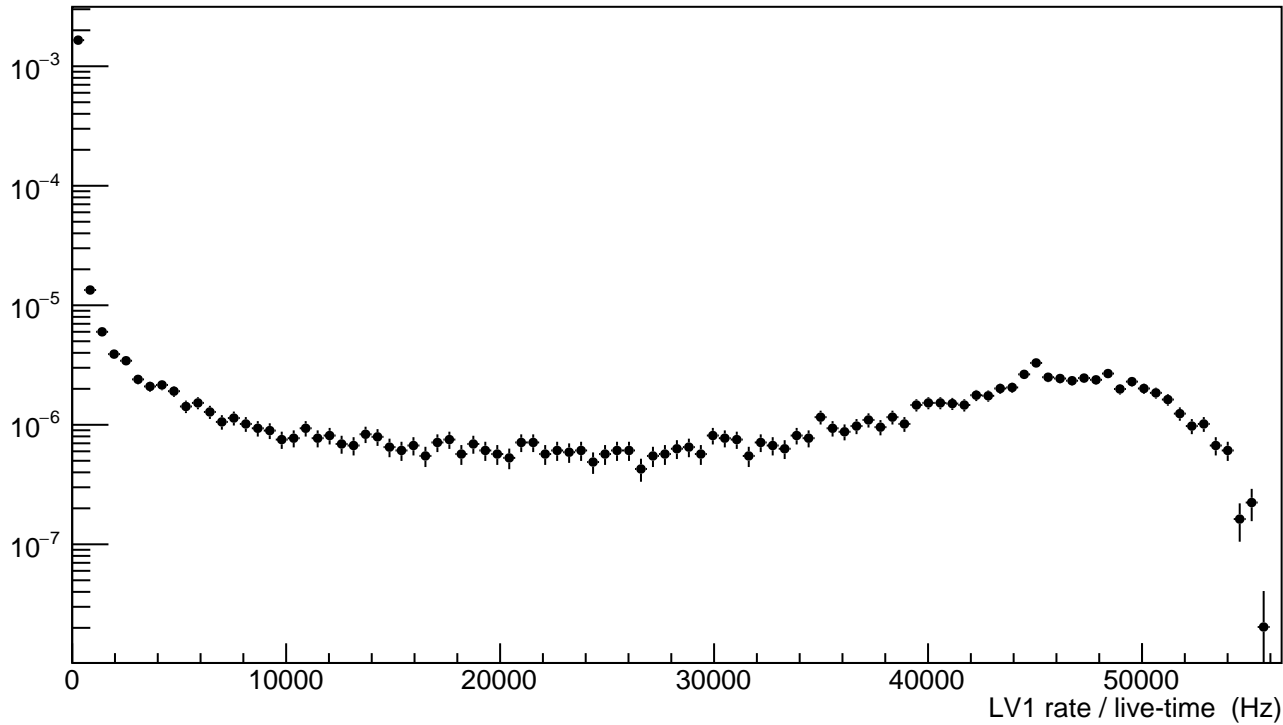

Supplement: s1 [file s1]

probability density

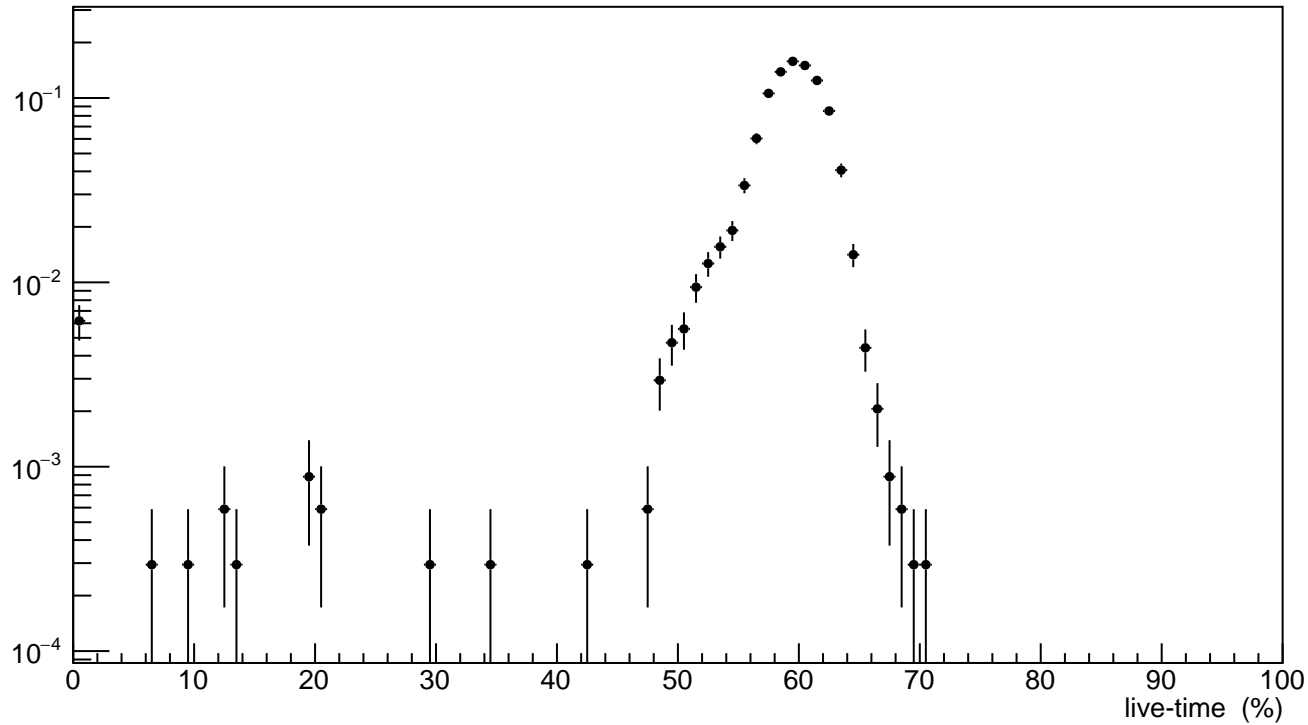

Supplement: s1 [file s1]

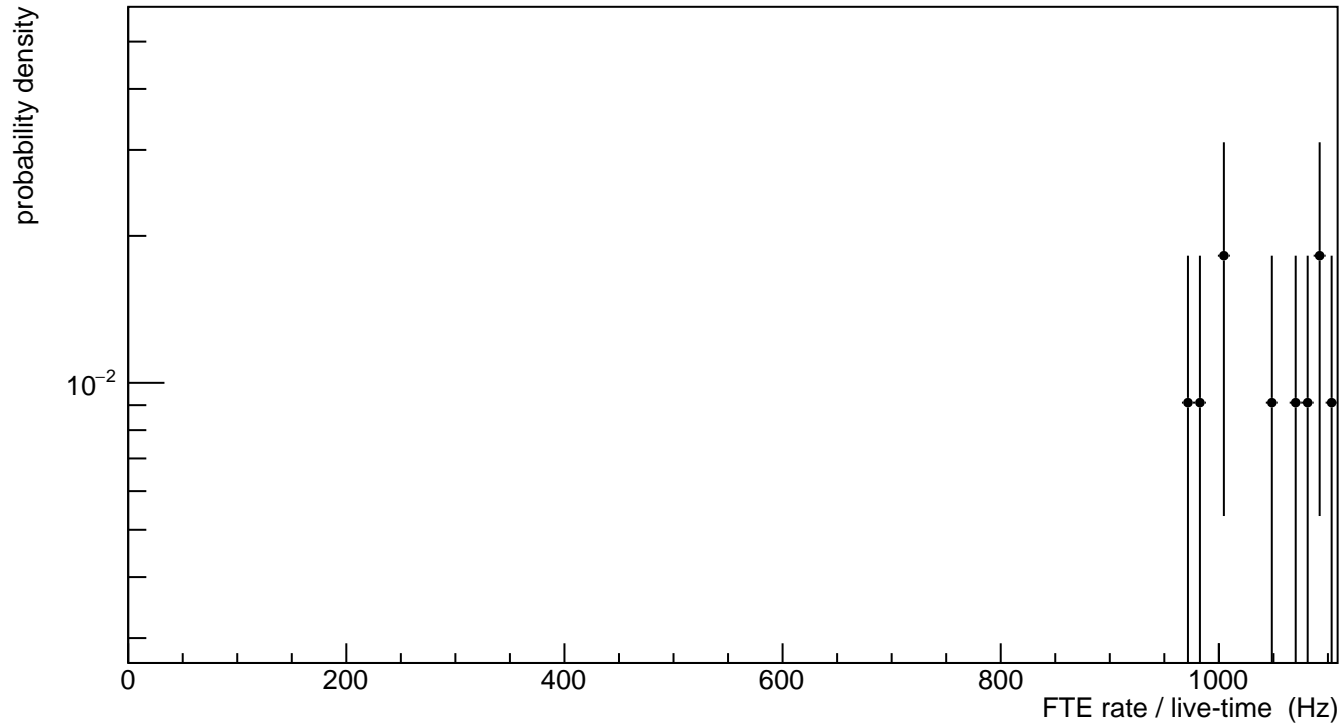

Supplement: s1 [file s1]

probability density

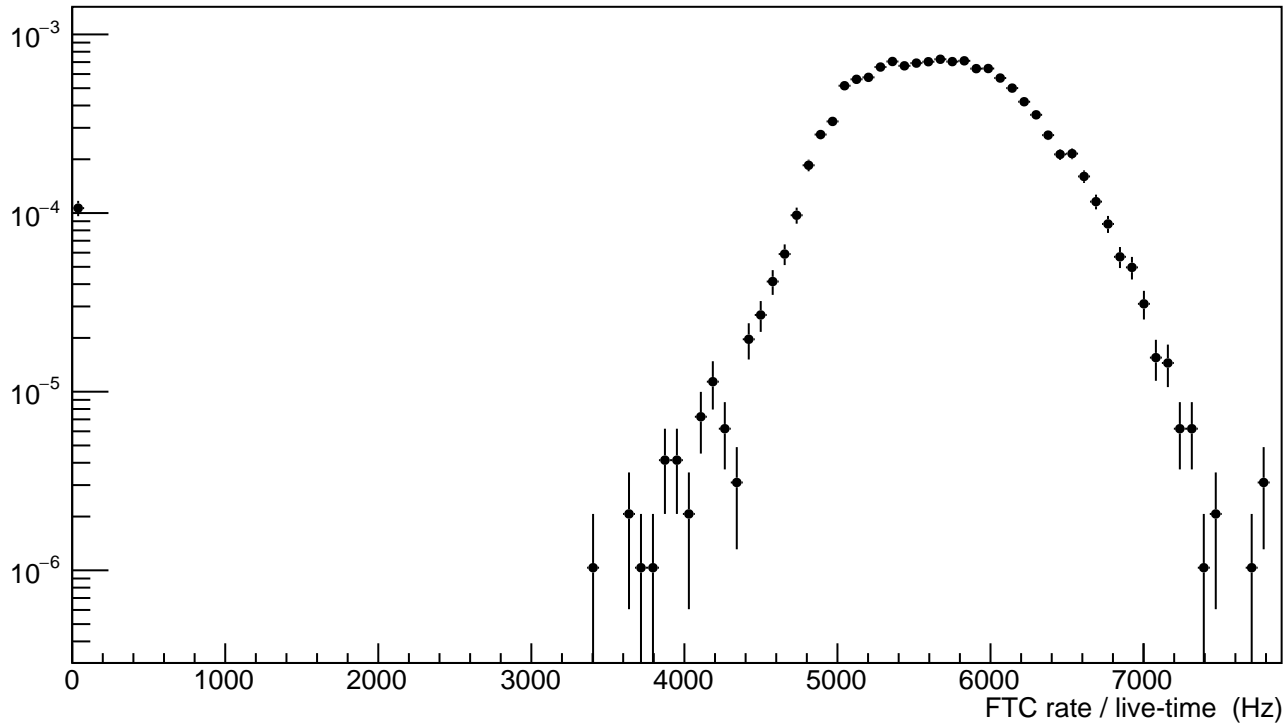

Supplement: s1 [file s1]

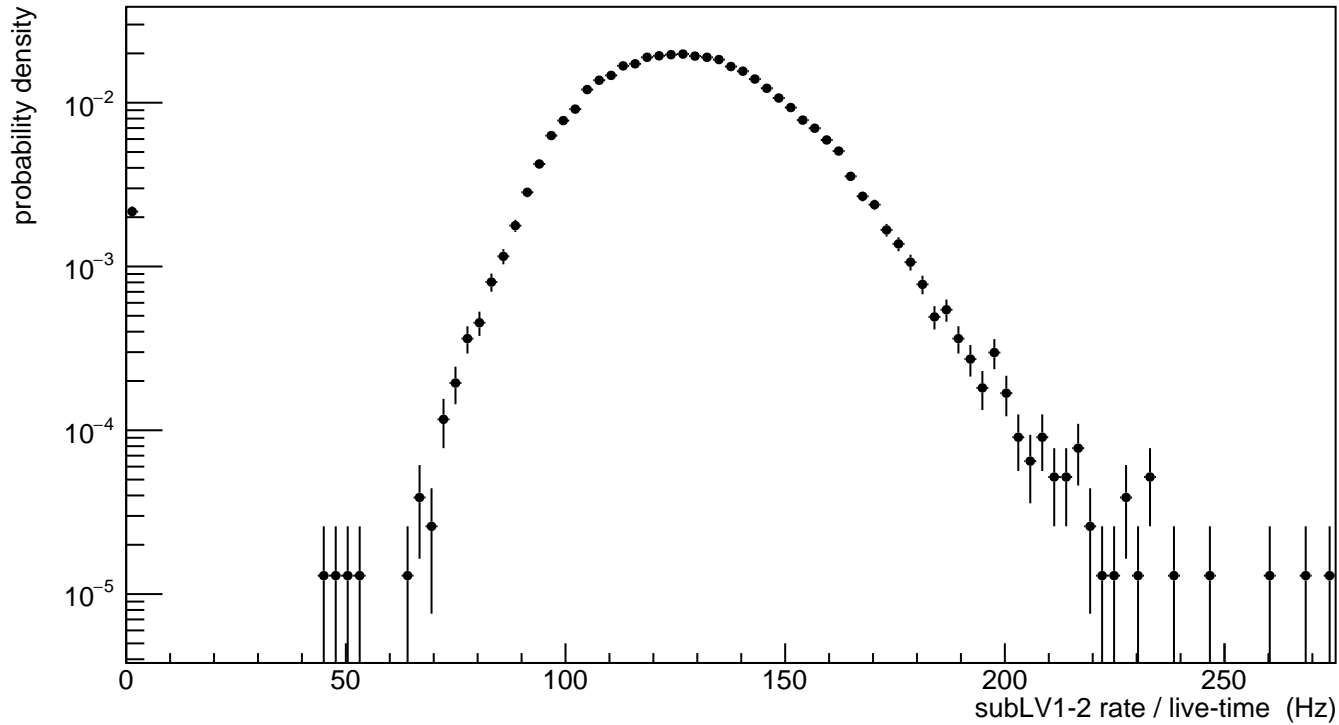

Supplement: s1 [file s1]

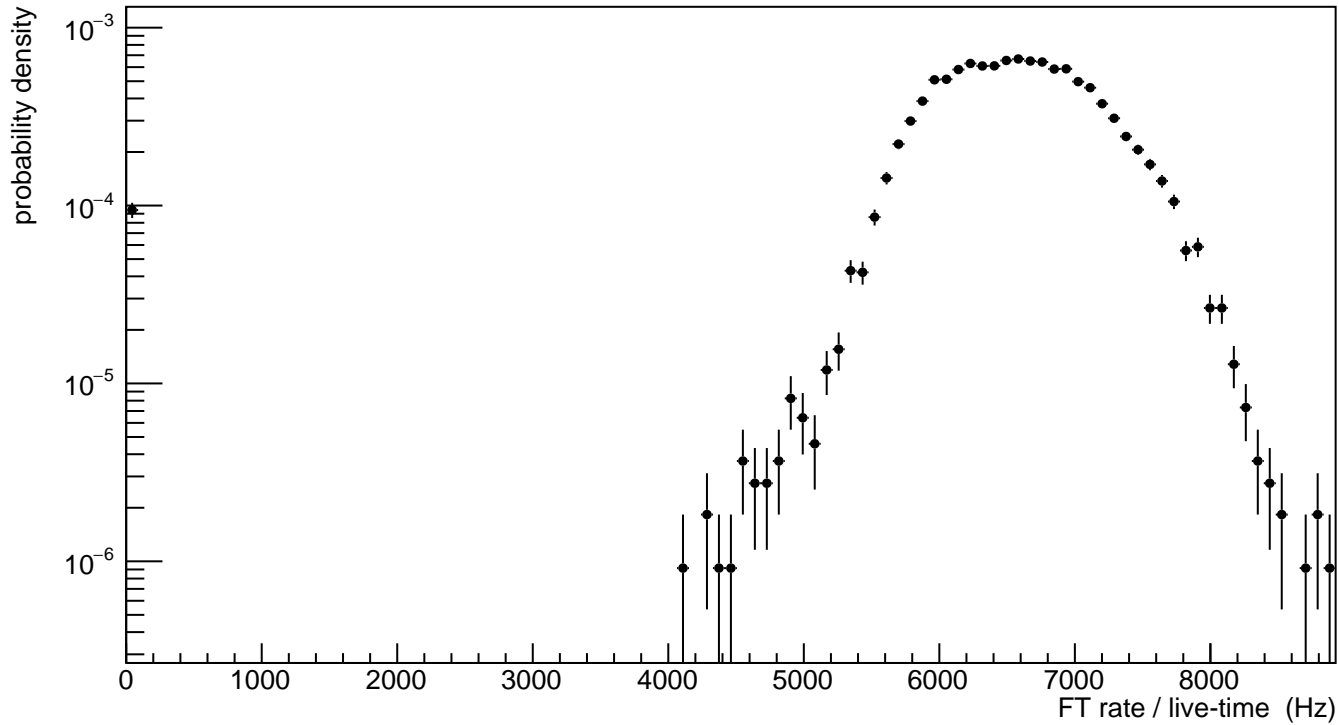

Supplement: s1 [file s1]
