# Supplementary figures and images for: Real-Time Monitoring of Solar Energetic Particles Using the Alpha Magnetic Spectrometer on the International Space Station (part 2 of 2)
Source: MDPI journal article supplement (doi:10.3390/instruments7040038), 2023-10-31

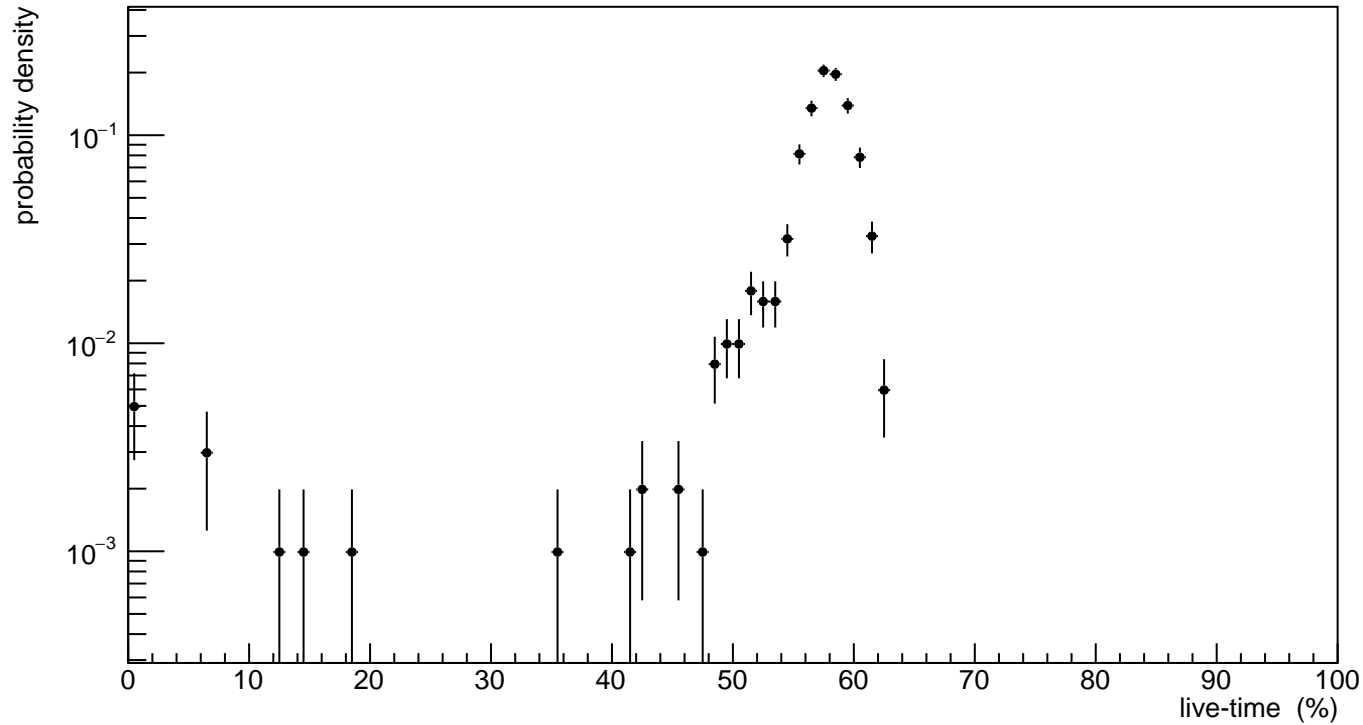

Supplement: s1 [file s1]

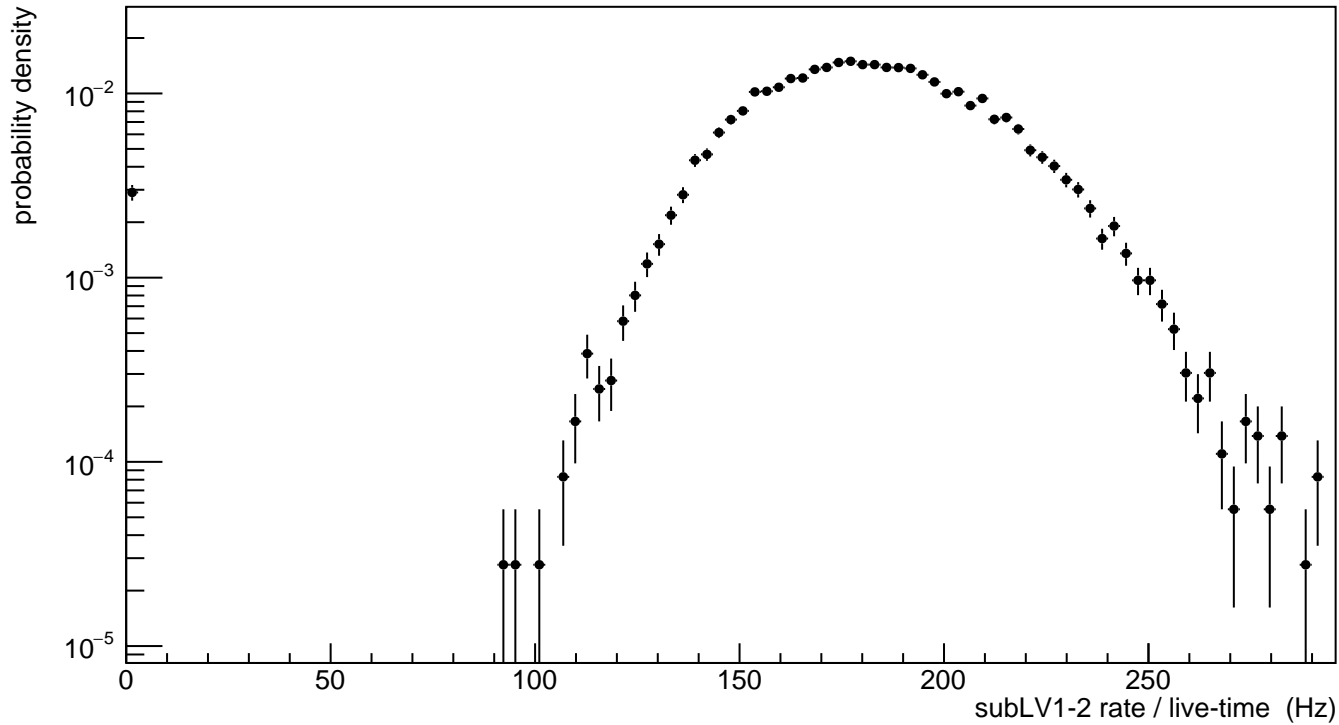

Supplement: s1 [file s1]

probability density

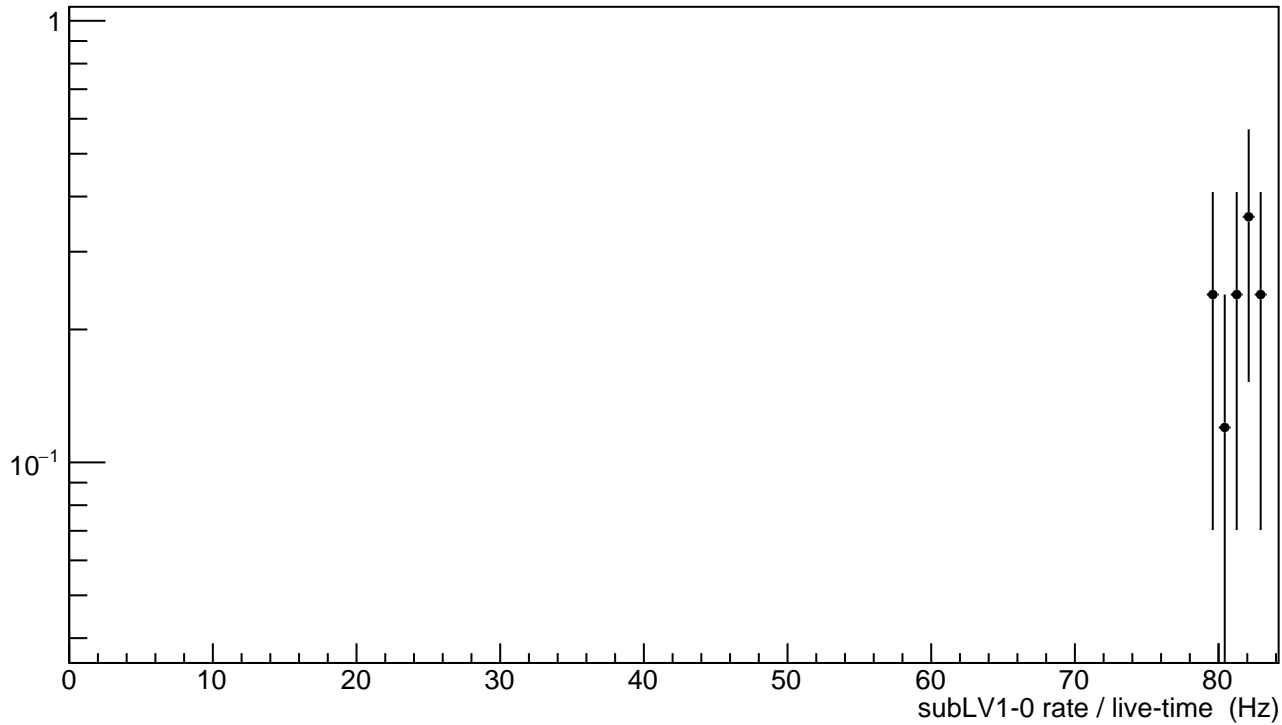

Supplement: s1 [file s1]

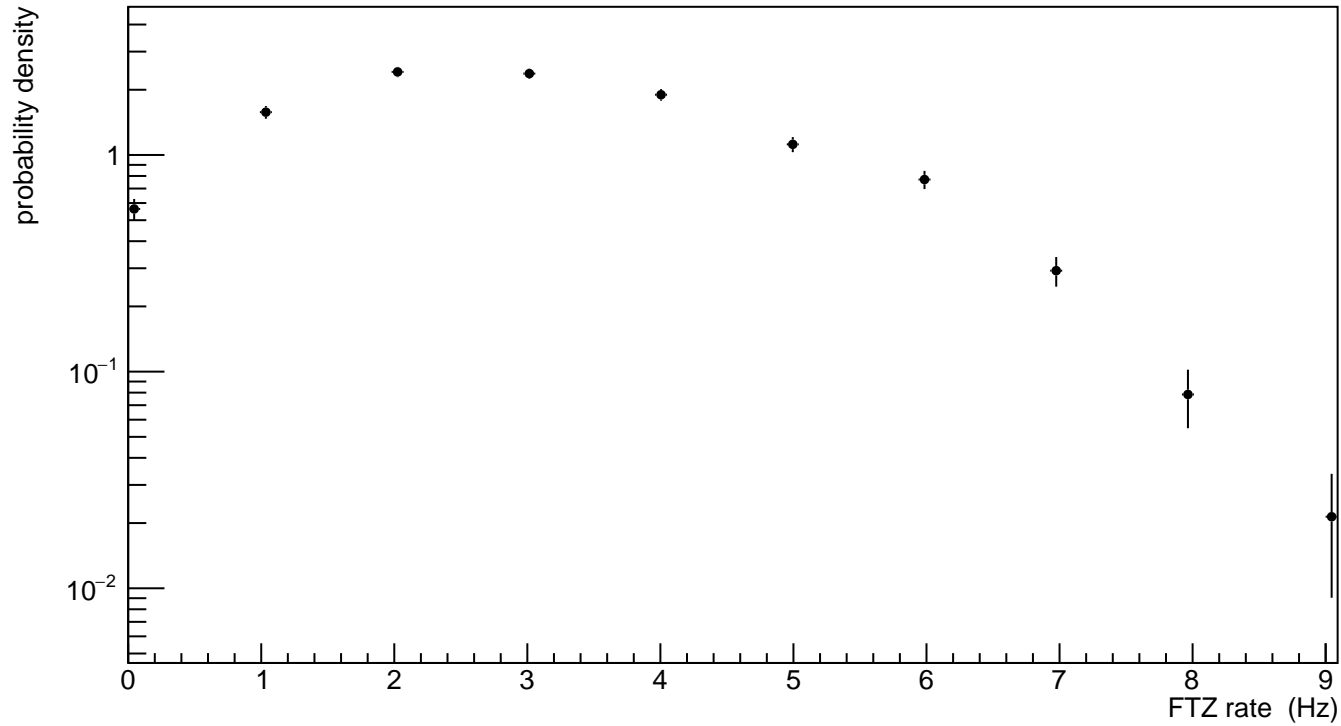

Supplement: s1 [file s1]

probability density

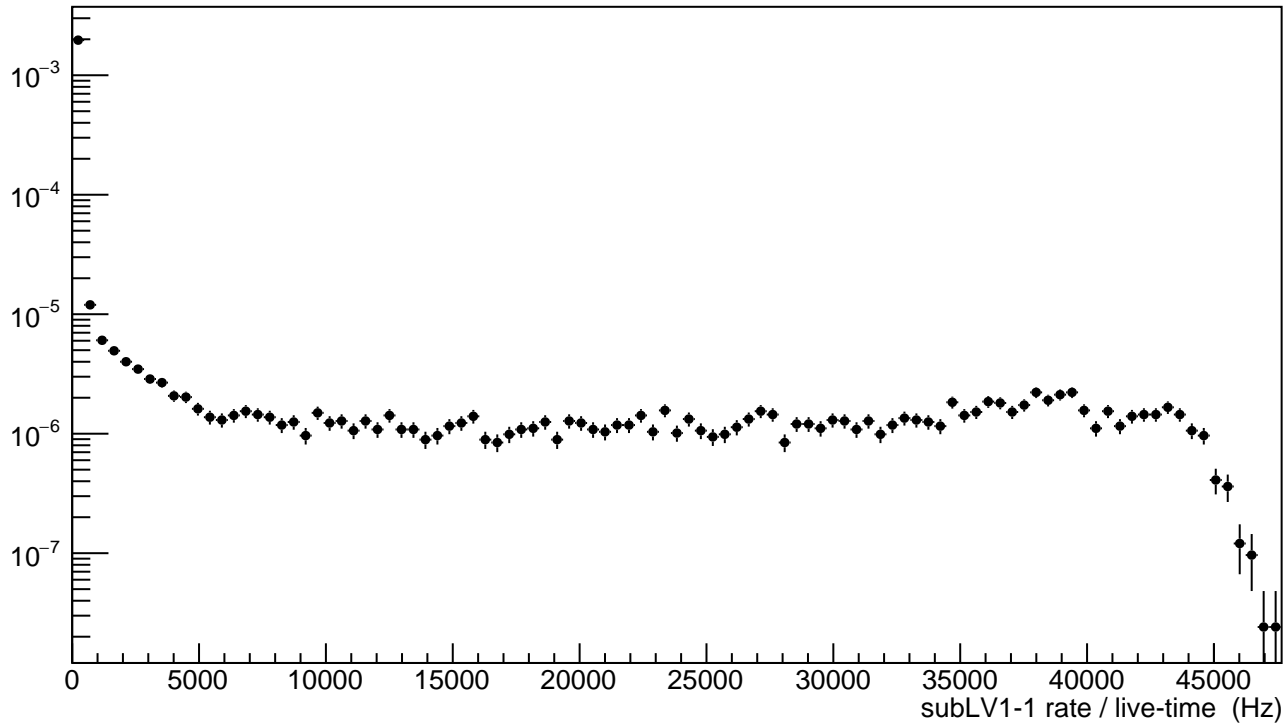

Supplement: s1 [file s1]

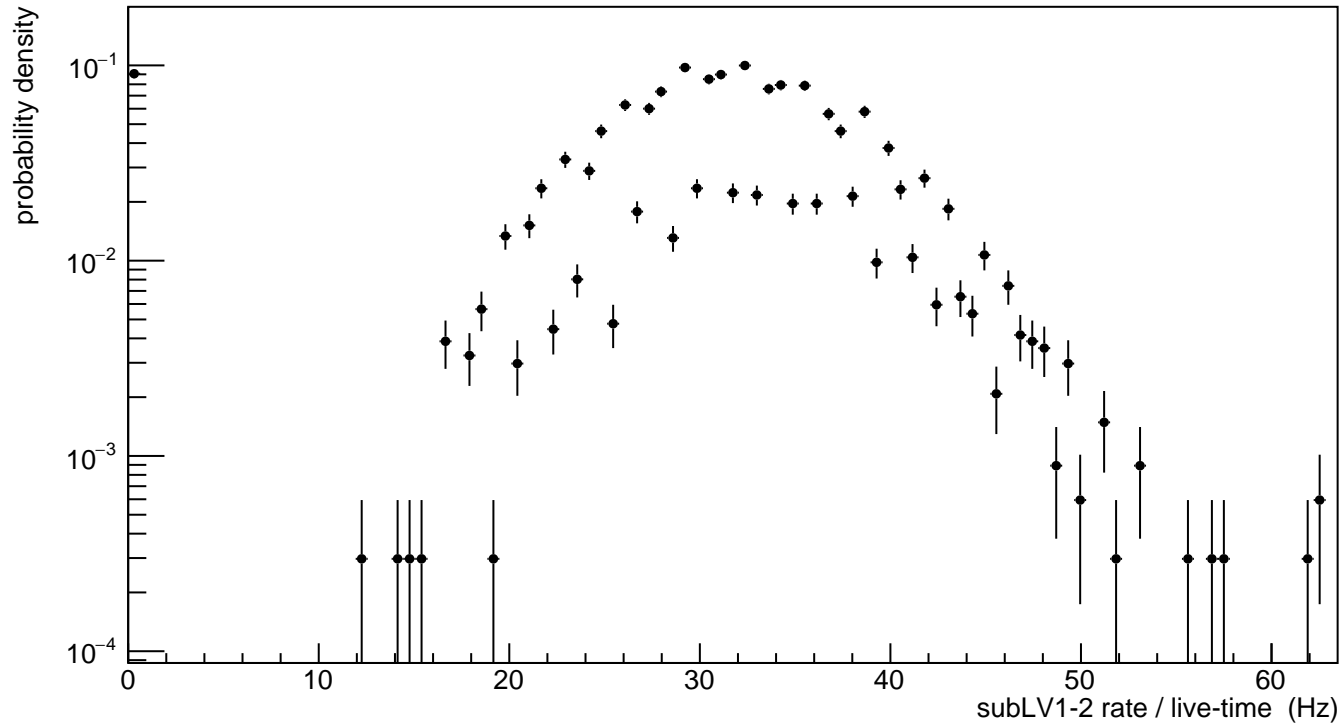

Supplement: s1 [file s1]

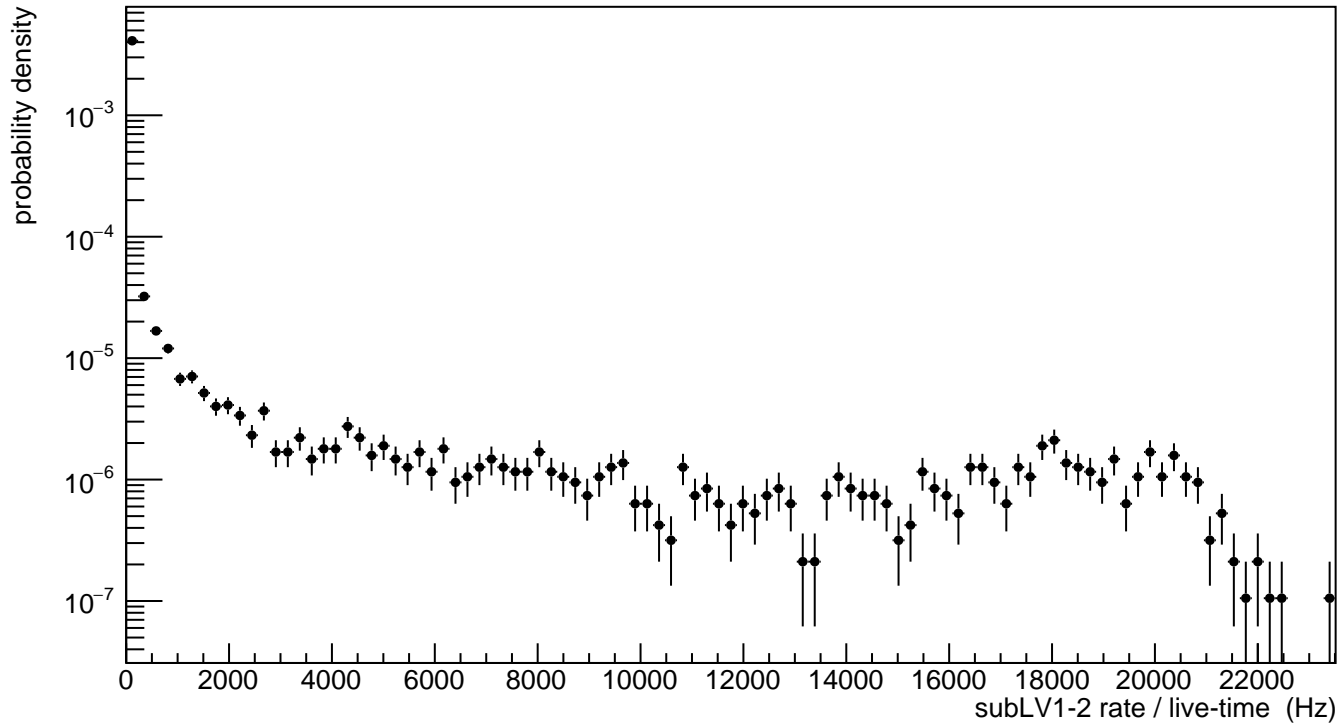

Supplement: s1 [file s1]

probability density

$10^{-2}$

$10^{-3}$

0

20

40

60

80

100

120

140

160

180

subLV1-5 rate / live-time (Hz)

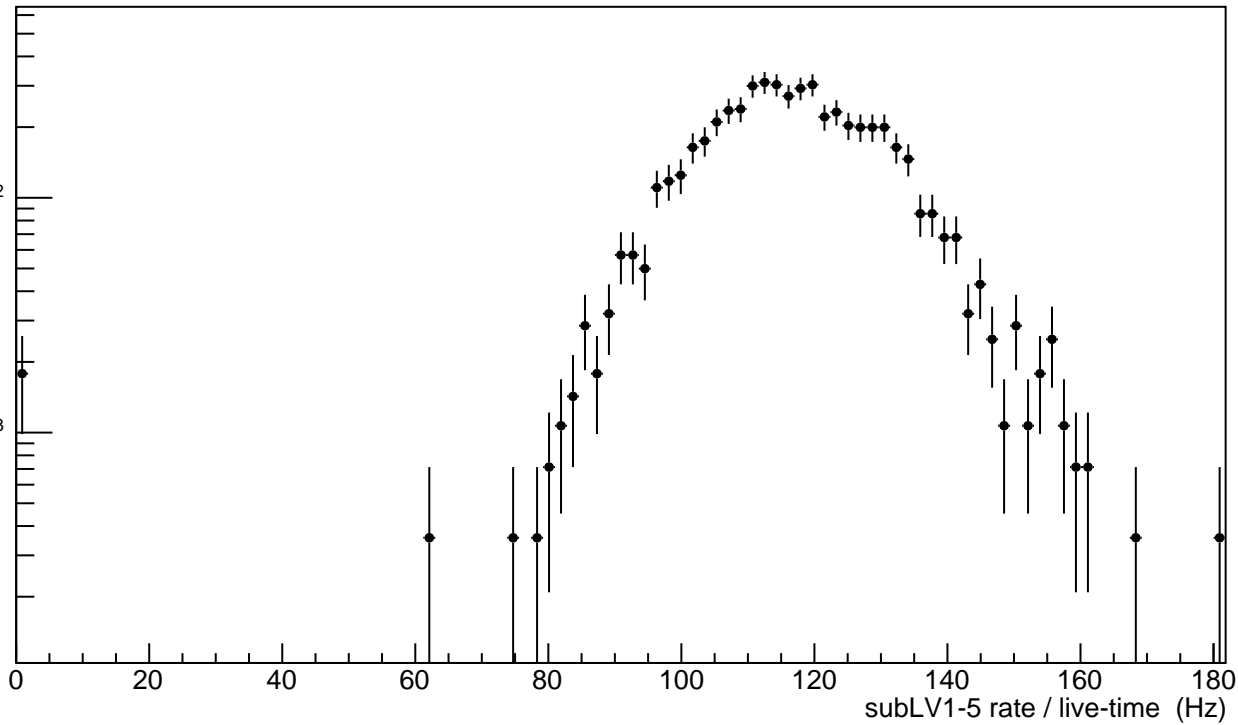

Supplement: s1 [file s1]

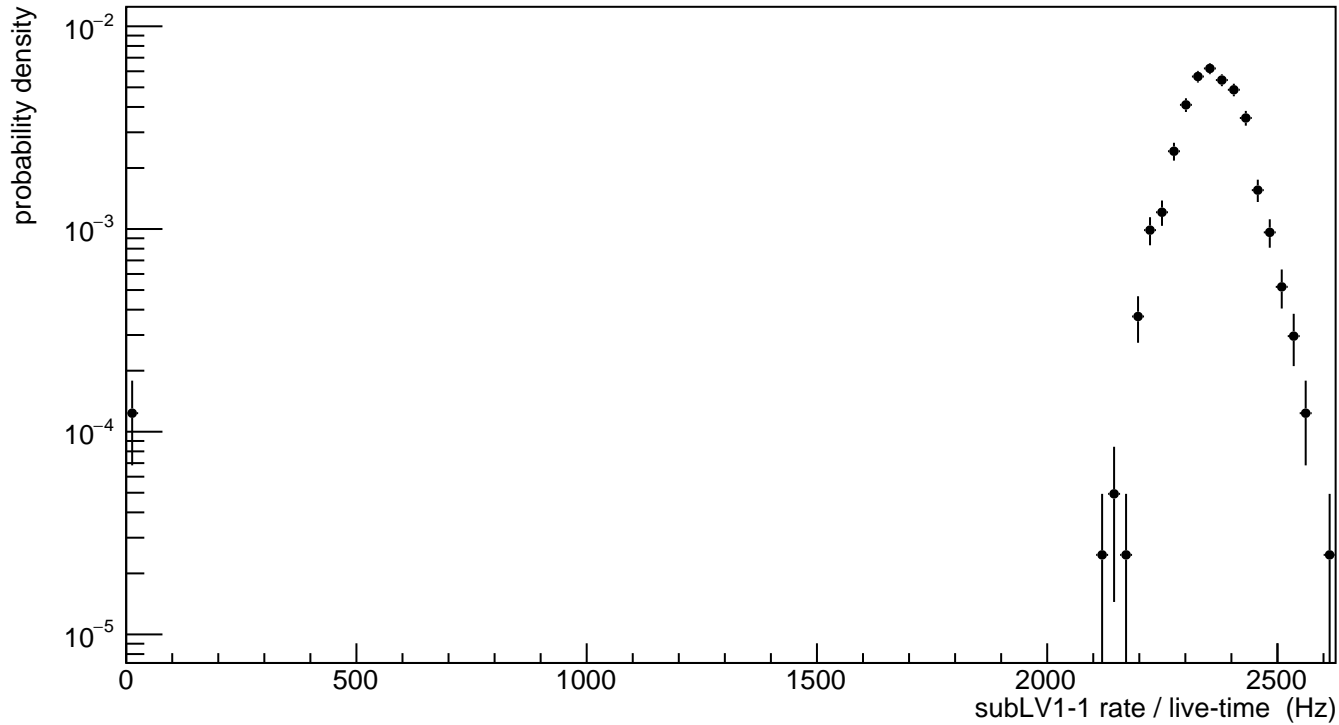

Supplement: s1 [file s1]

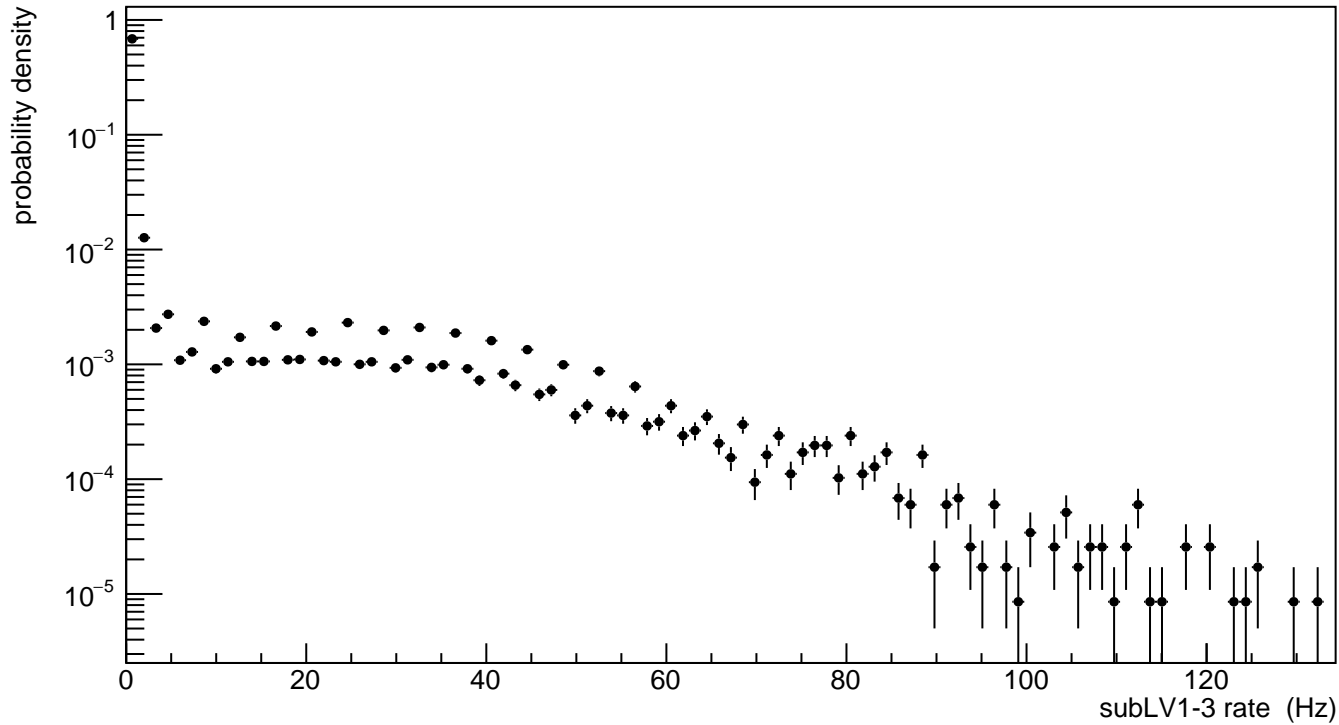

Supplement: s1 [file s1]

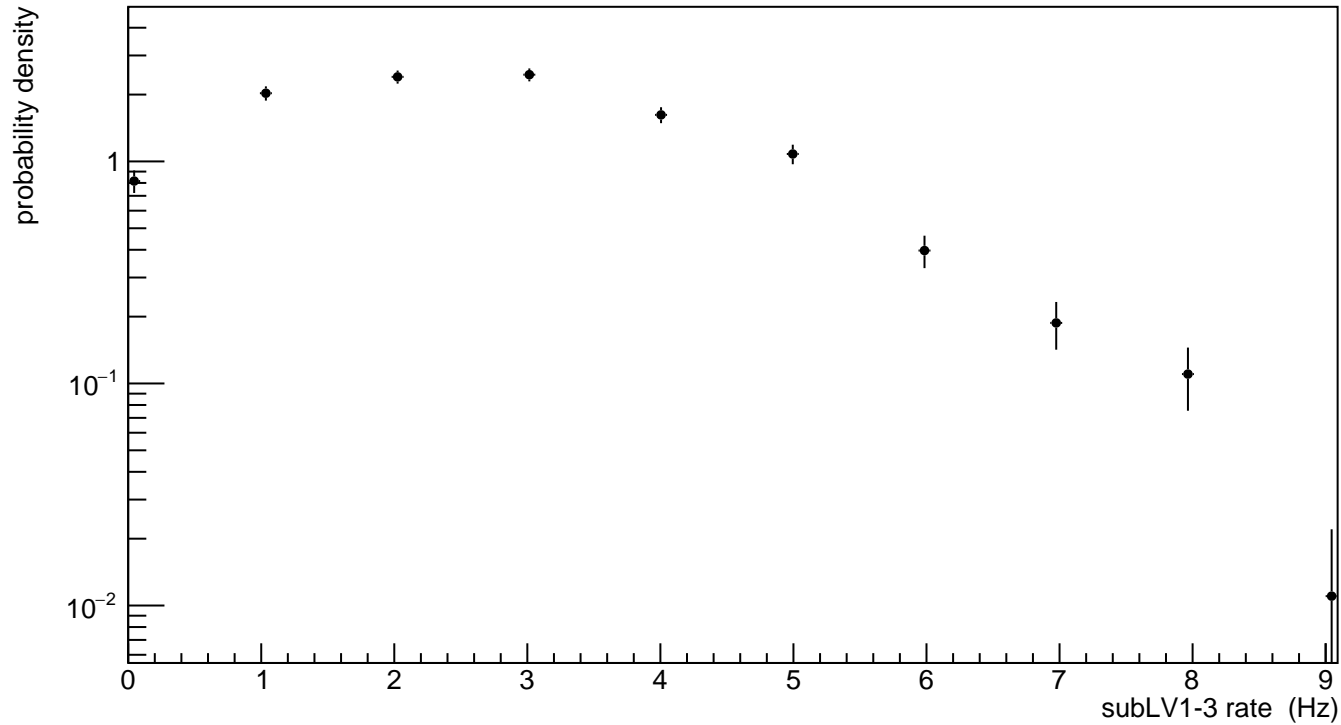

Supplement: s1 [file s1]

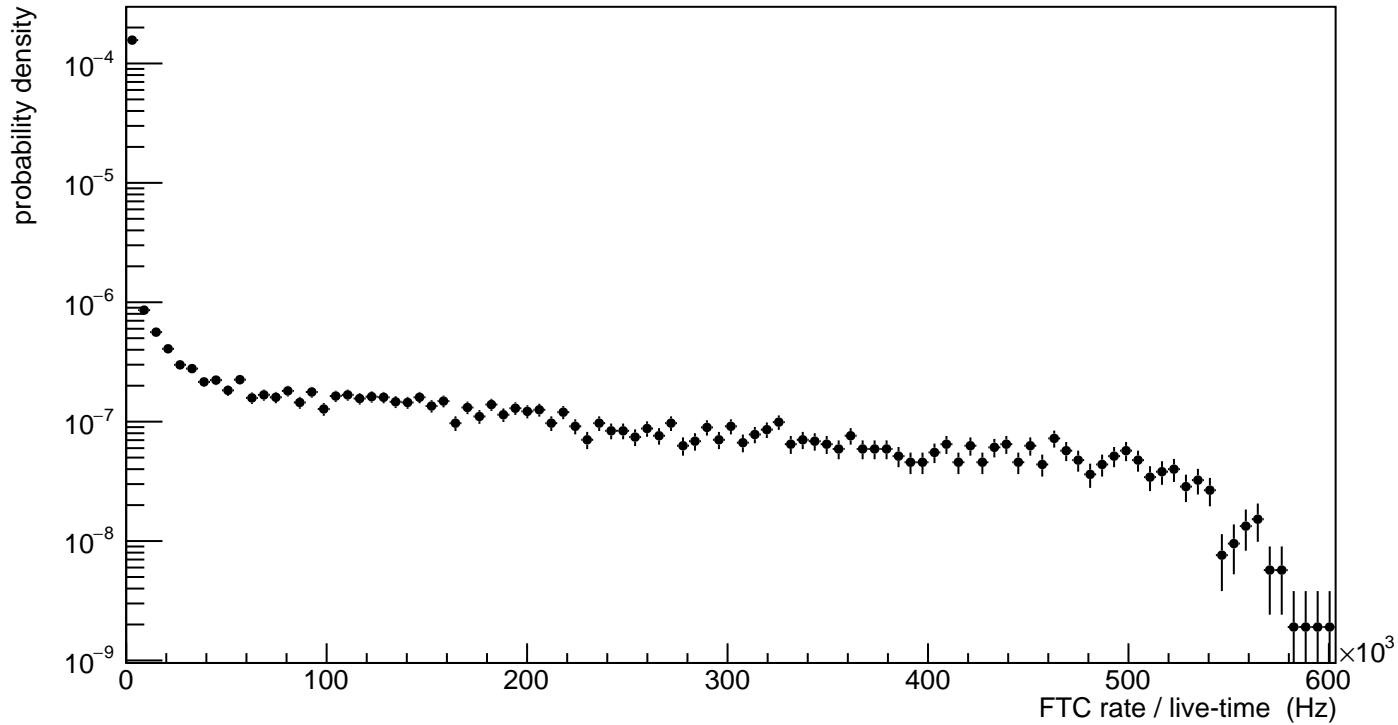

Supplement: s1 [file s1]

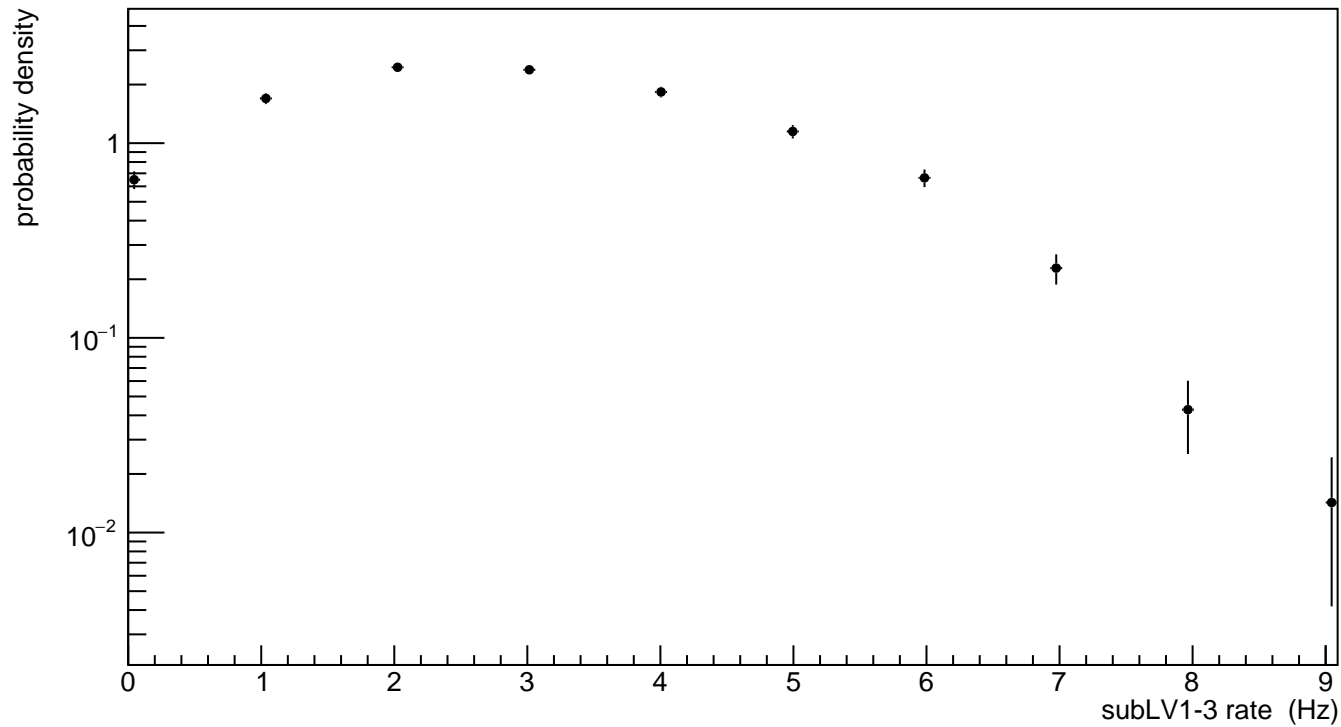

Supplement: s1 [file s1]

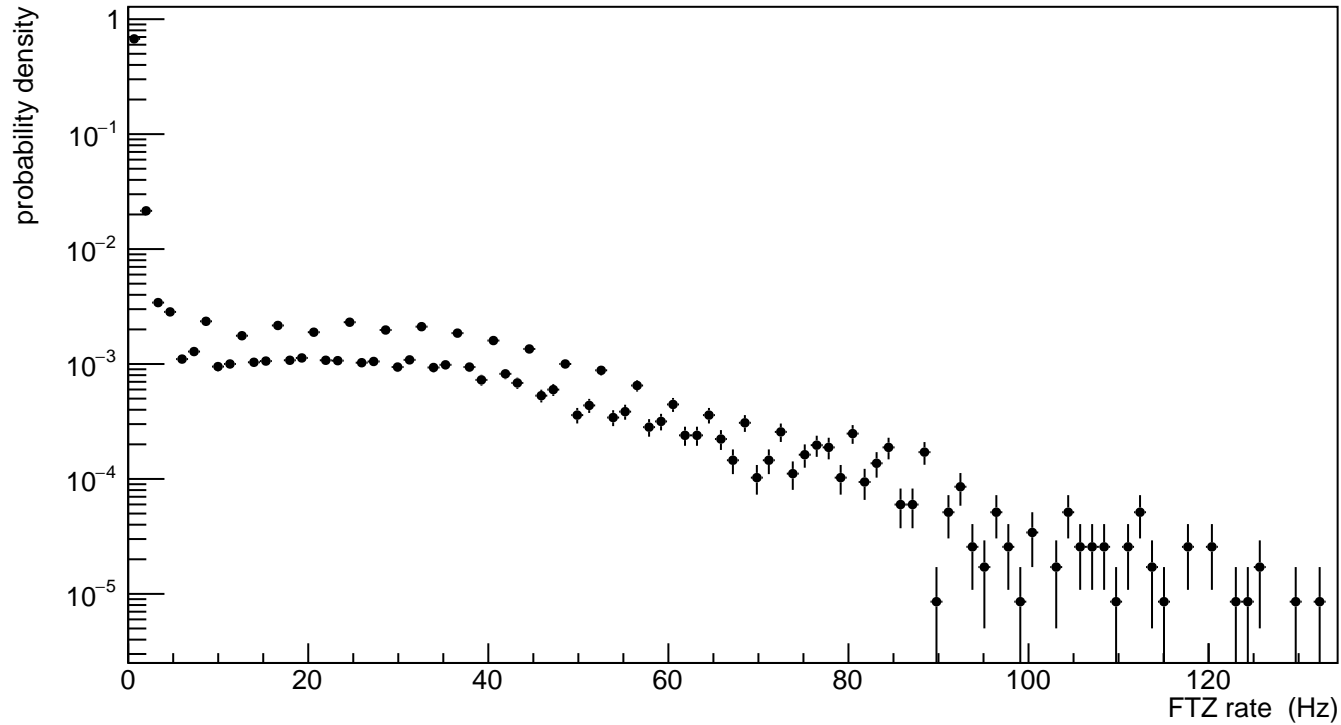

Supplement: s1 [file s1]

probability density

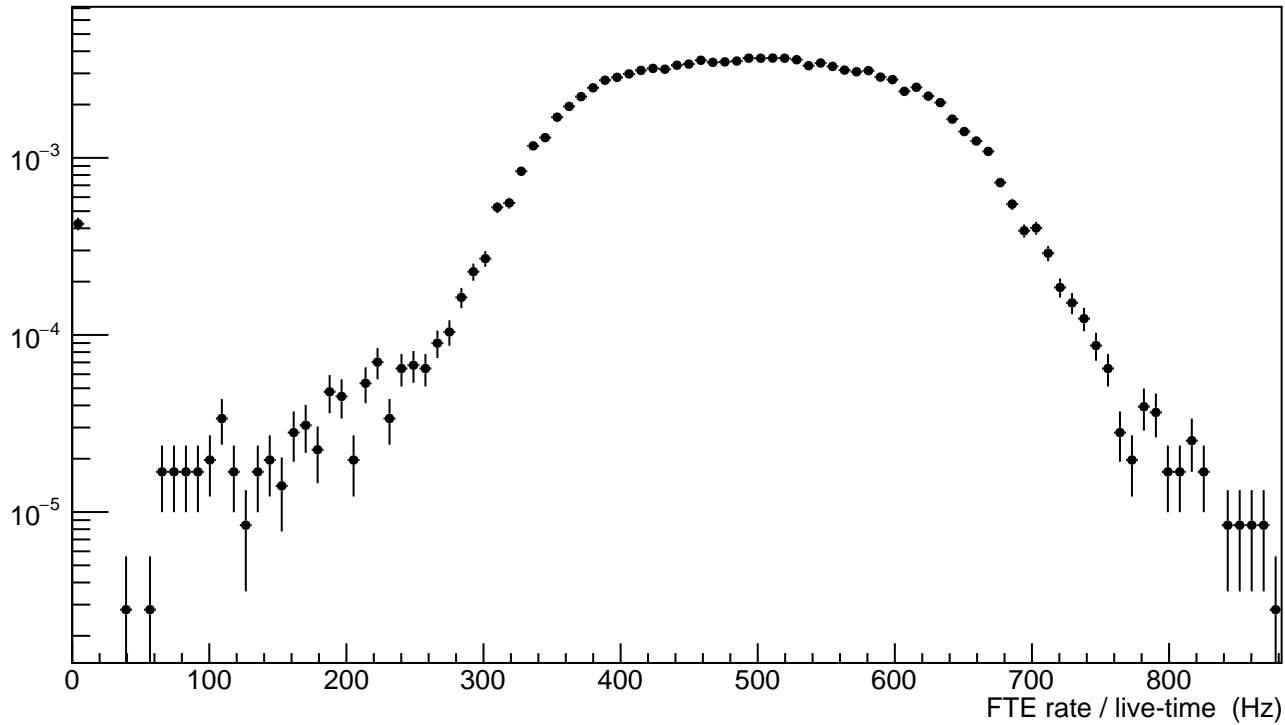

Supplement: s1 [file s1]

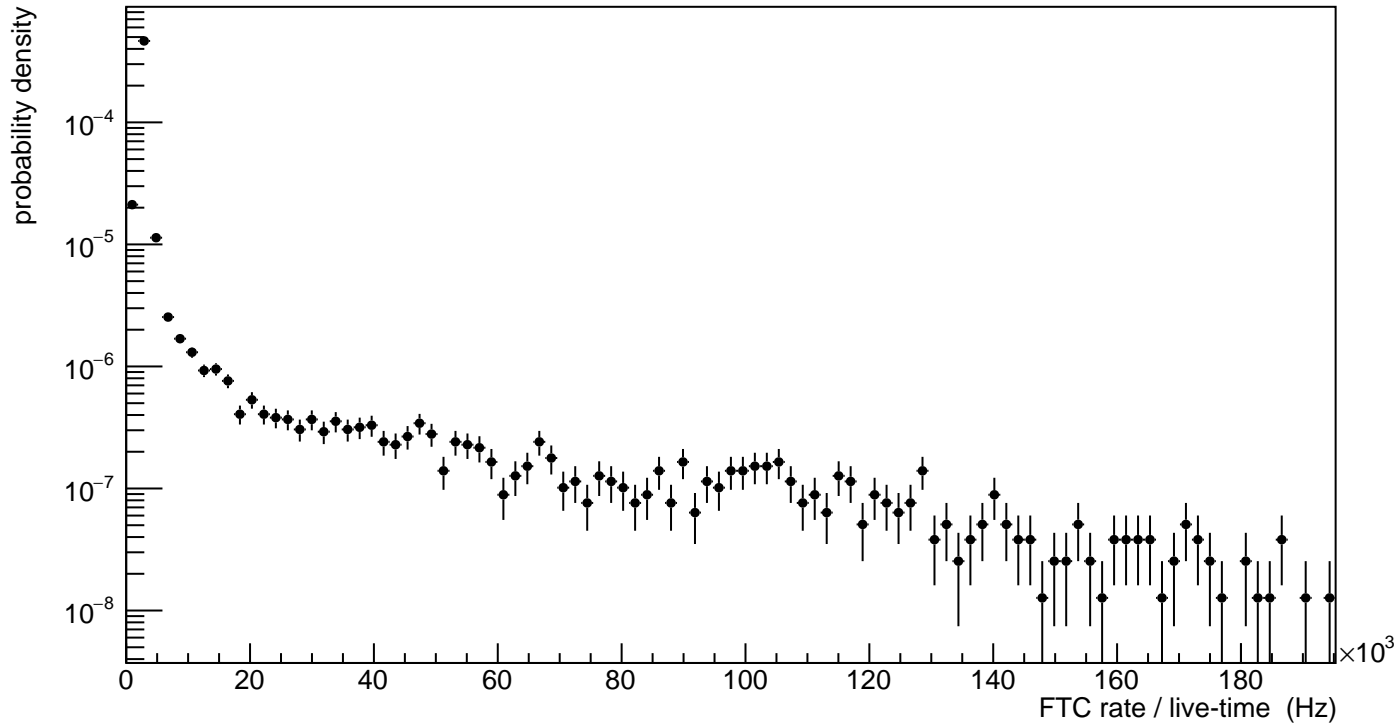

Supplement: s1 [file s1]

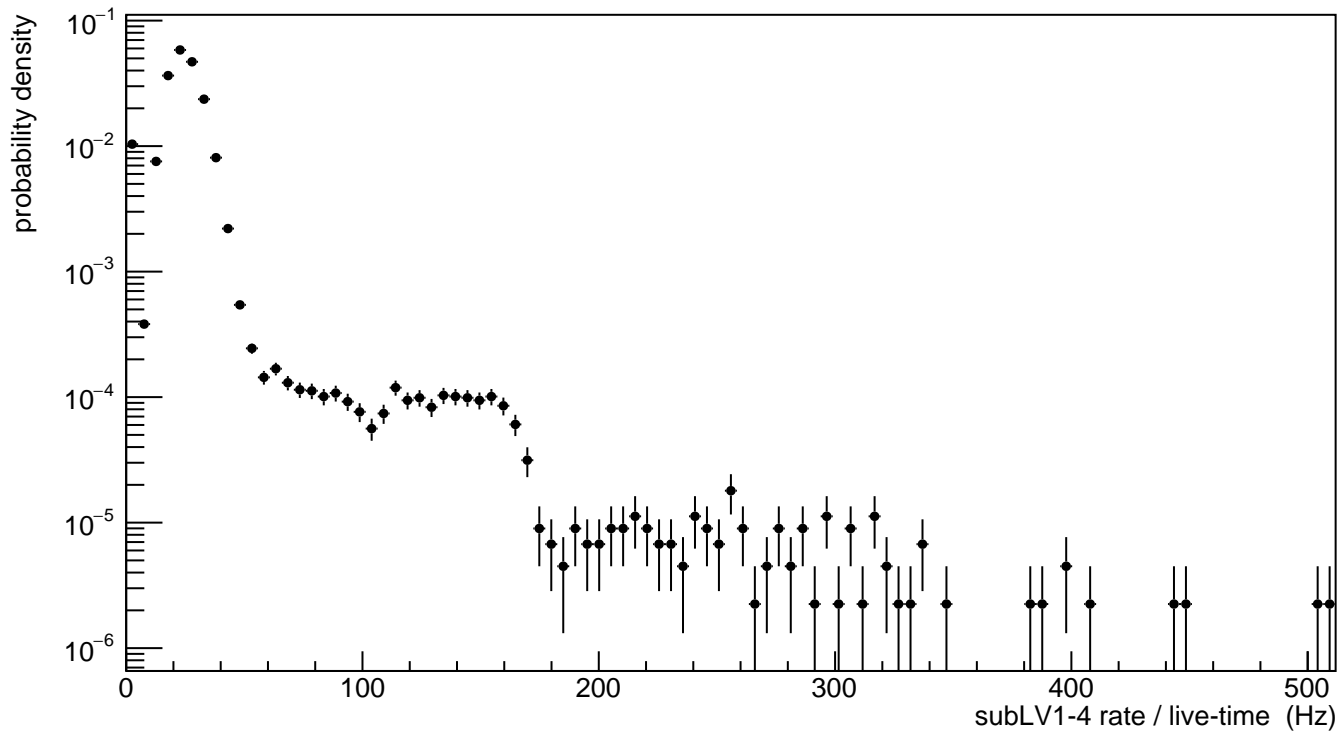

Supplement: s1 [file s1]

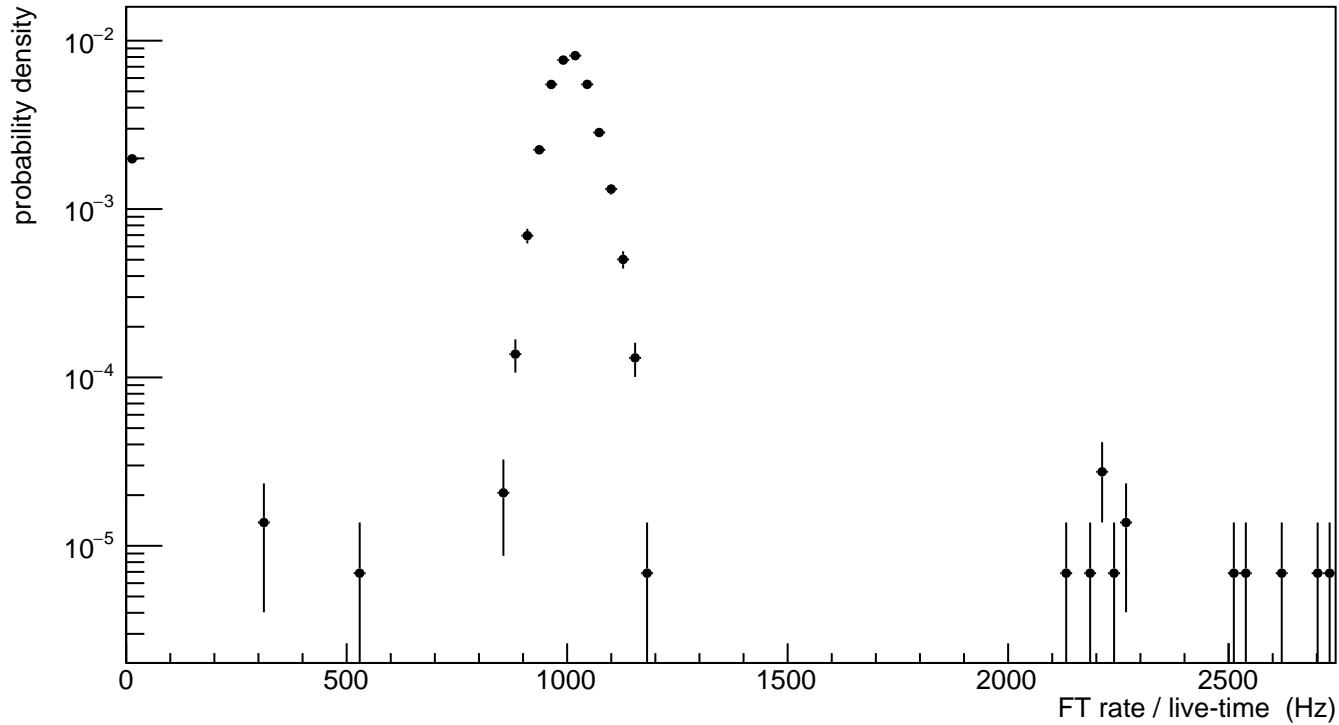

Supplement: s1 [file s1]

probability density

$10^{-1}$

$10^{-2}$

$10^{-3}$

0

10

20

30

40

50

60

70

80

90

subLV1-0 rate / live-time (Hz)

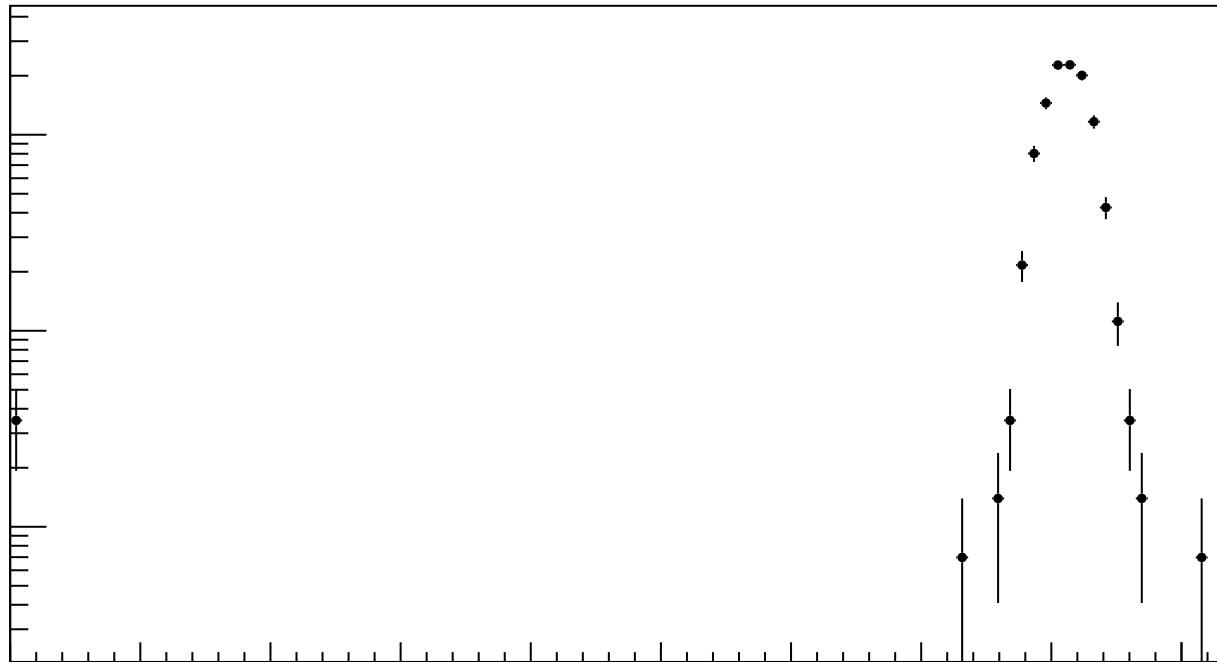

Supplement: s1 [file s1]

probability density

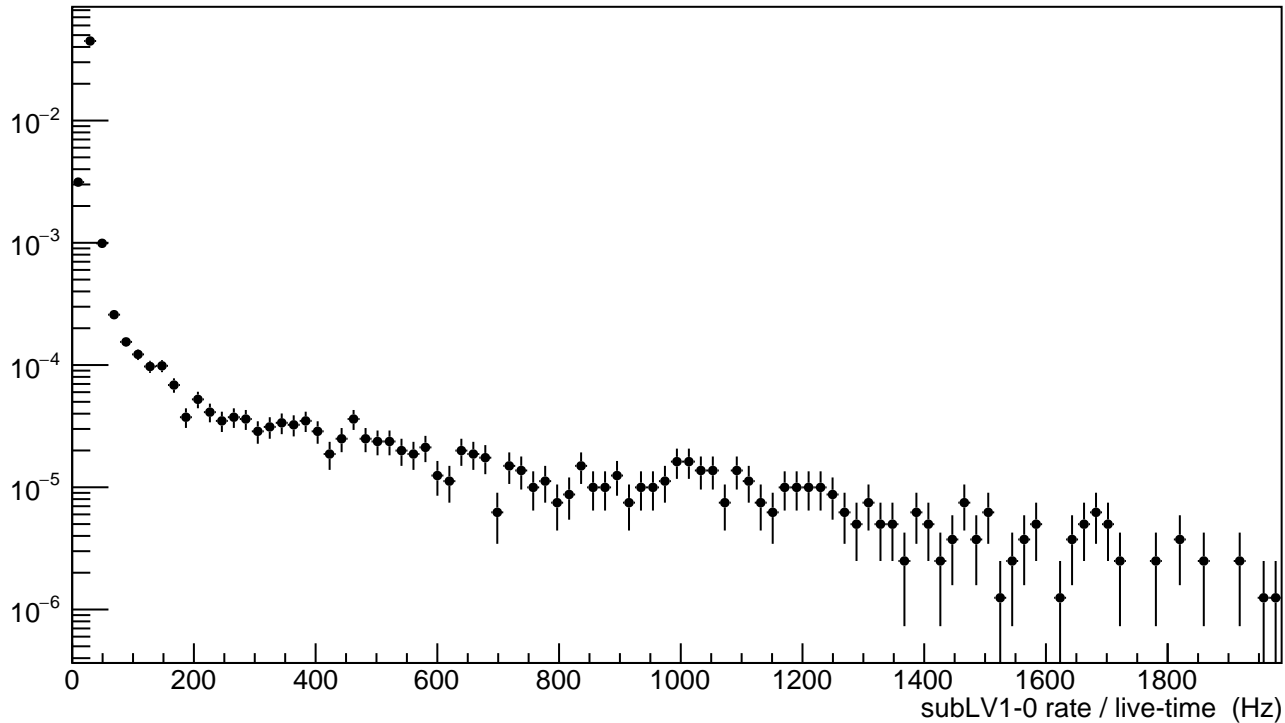

Supplement: s1 [file s1]

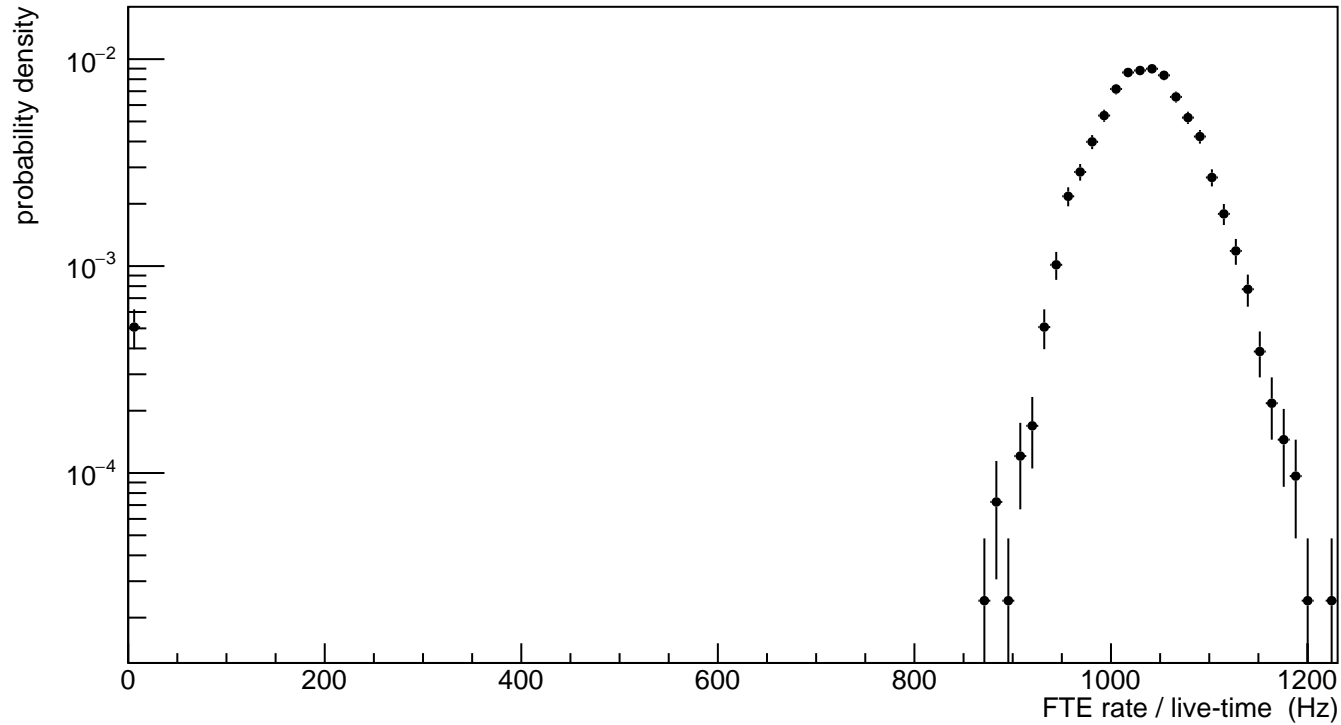

Supplement: s1 [file s1]

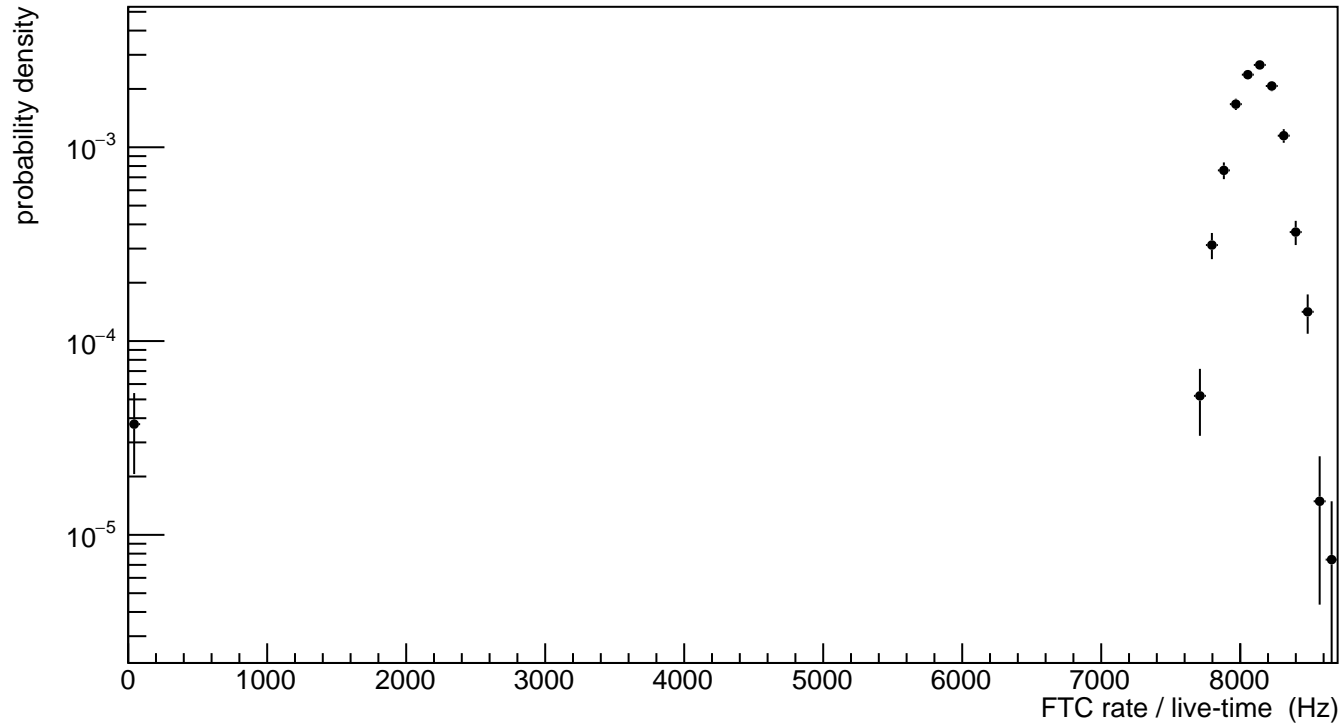

Supplement: s1 [file s1]

probability density

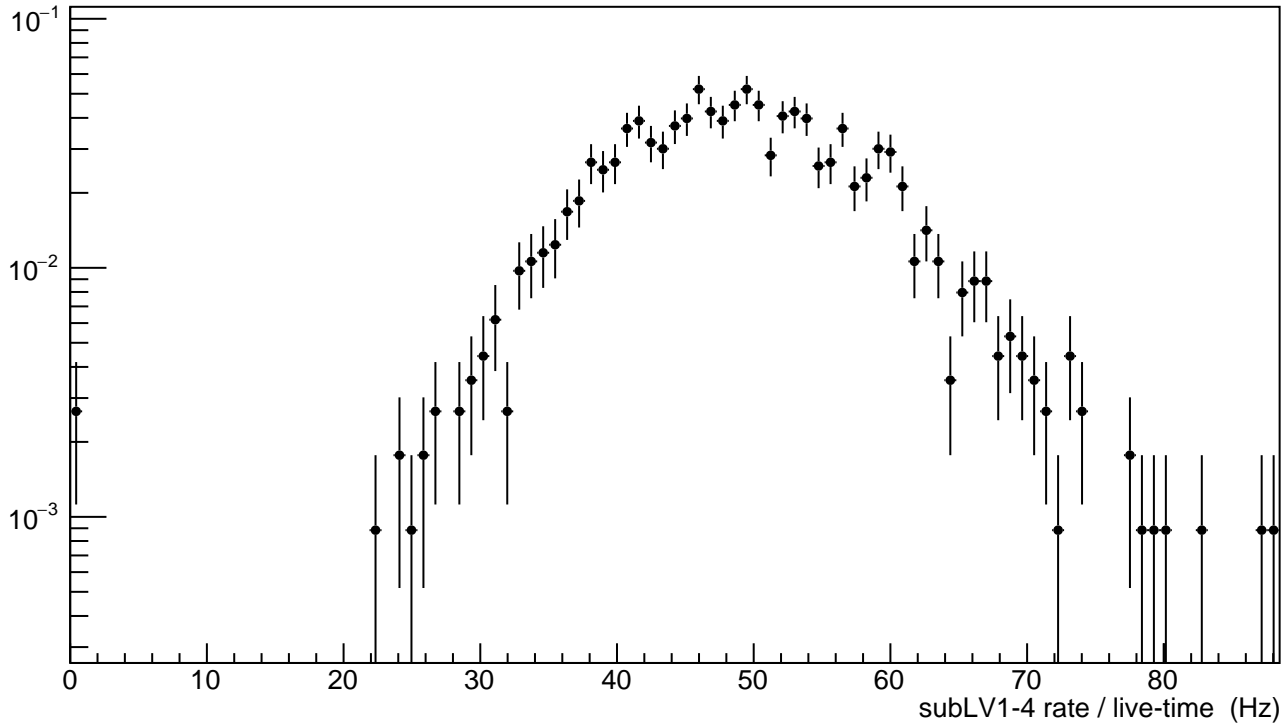

Supplement: s1 [file s1]

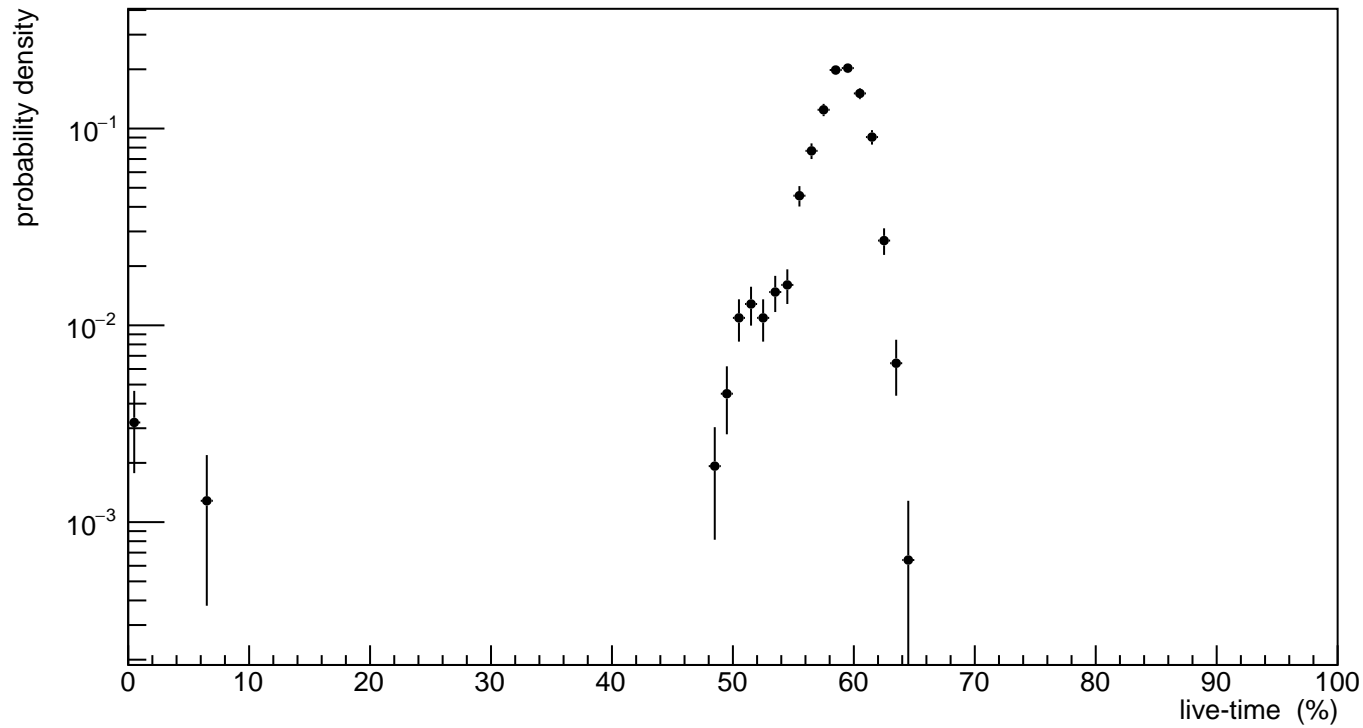

Supplement: s1 [file s1]

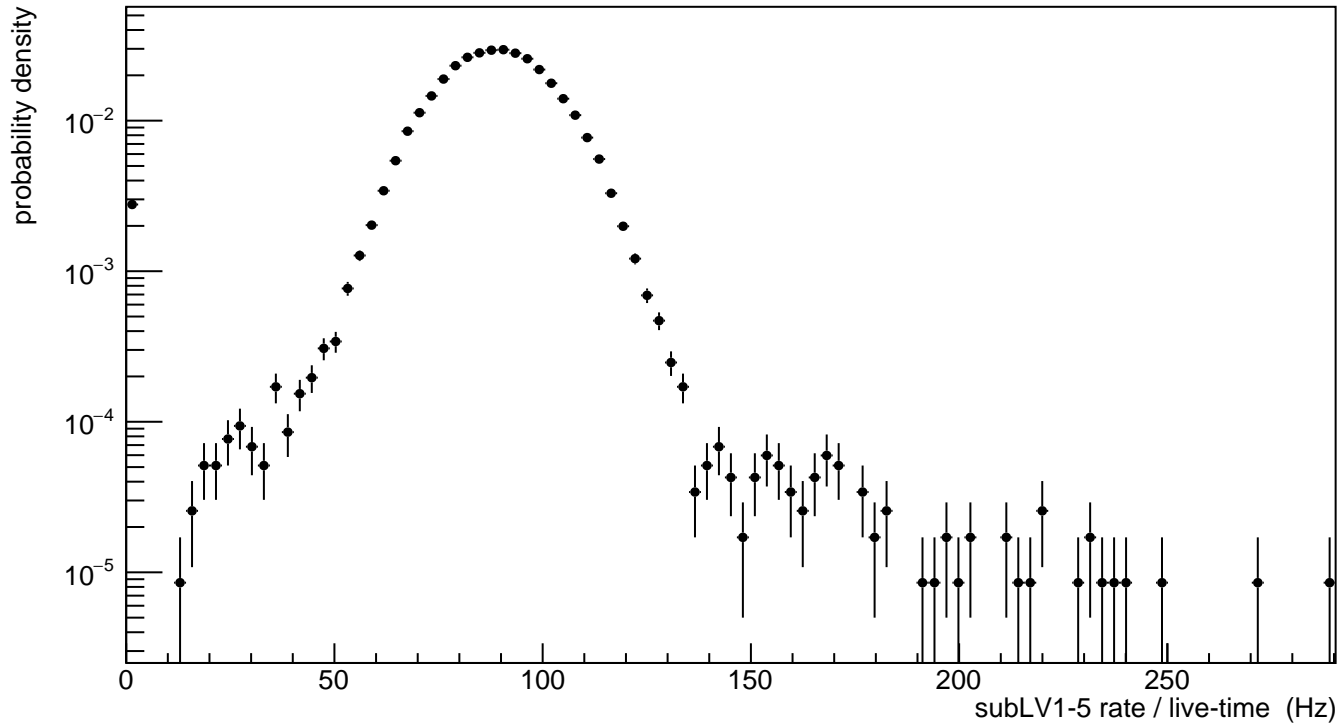

Supplement: s1 [file s1]

probability density

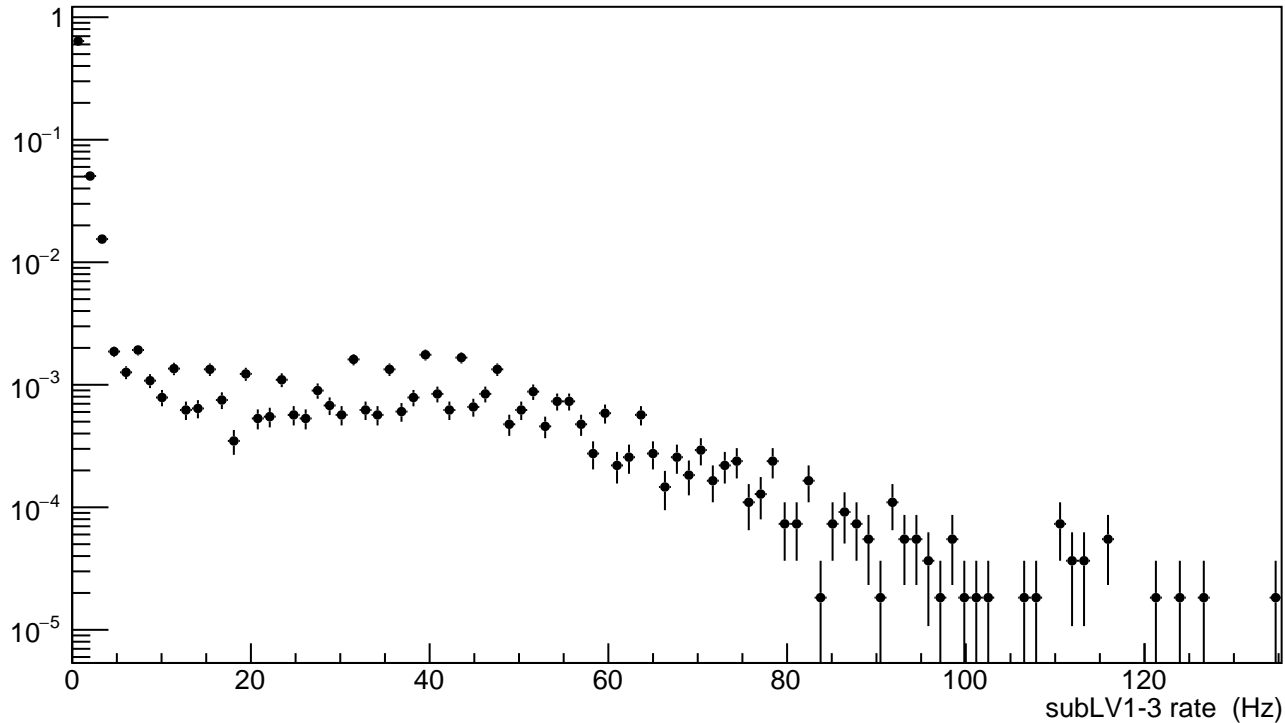

Supplement: s1 [file s1]

probability density

$10^{-1}$

0

10

20

30

40

50

60

subLV1-4 rate / live-time (Hz)

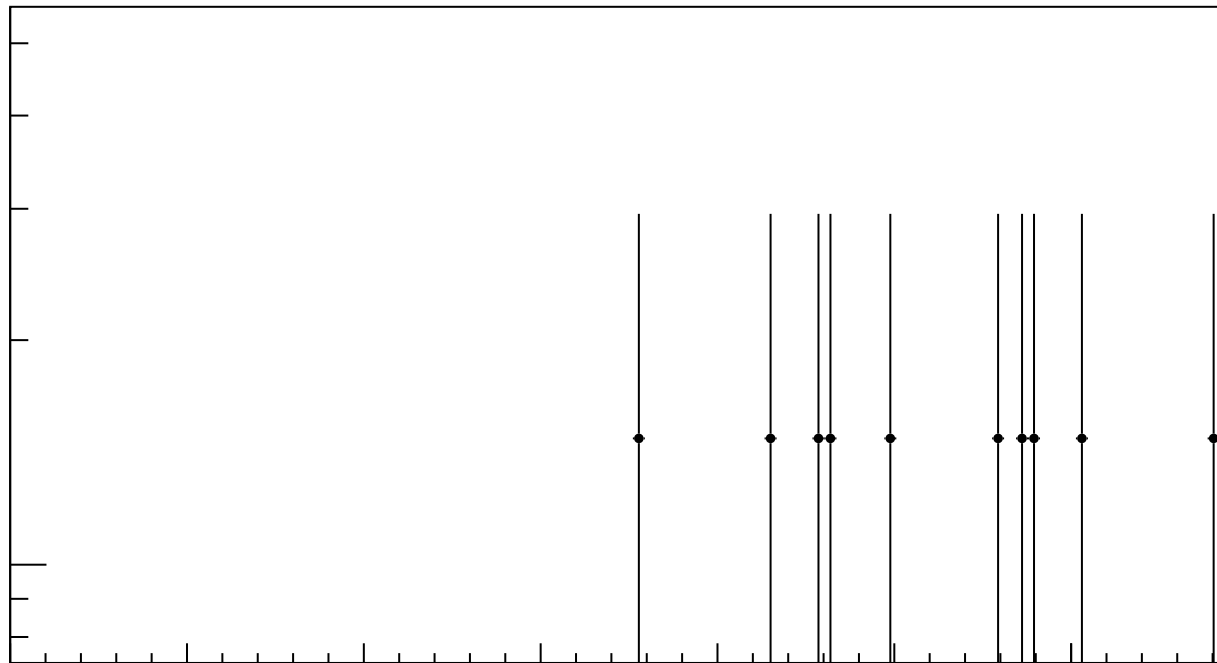

Supplement: s1 [file s1]

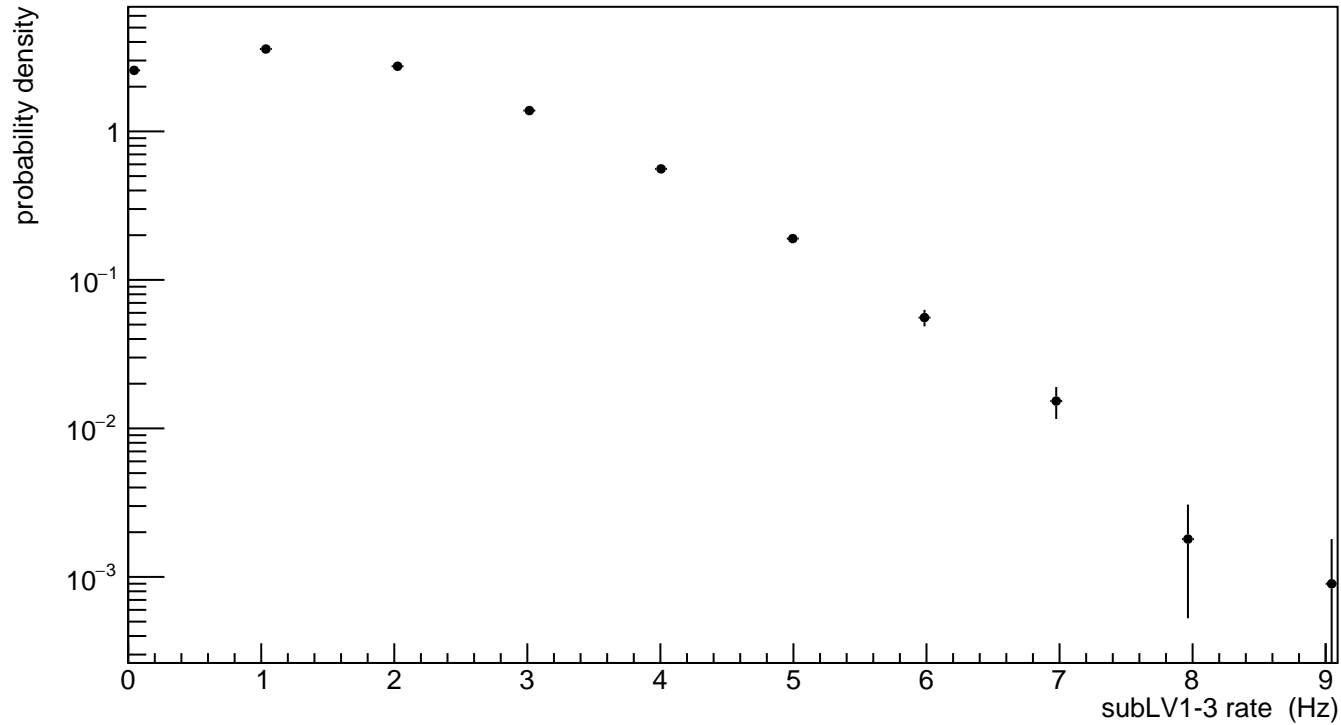

Supplement: s1 [file s1]

probability density

$10^{-3}$

$10^{-4}$

$10^{-5}$

0

1000

2000

3000

4000

5000

6000

7000

8000

FTC rate / live-time (Hz)

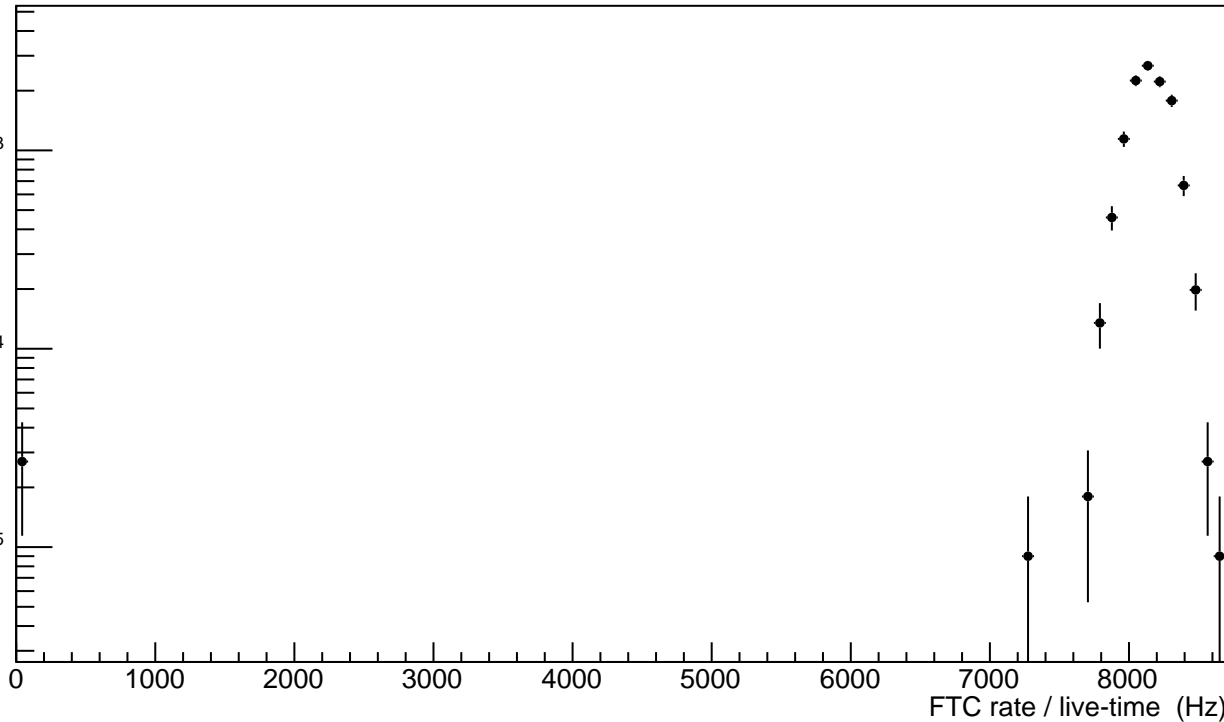

Supplement: s1 [file s1]

probability density

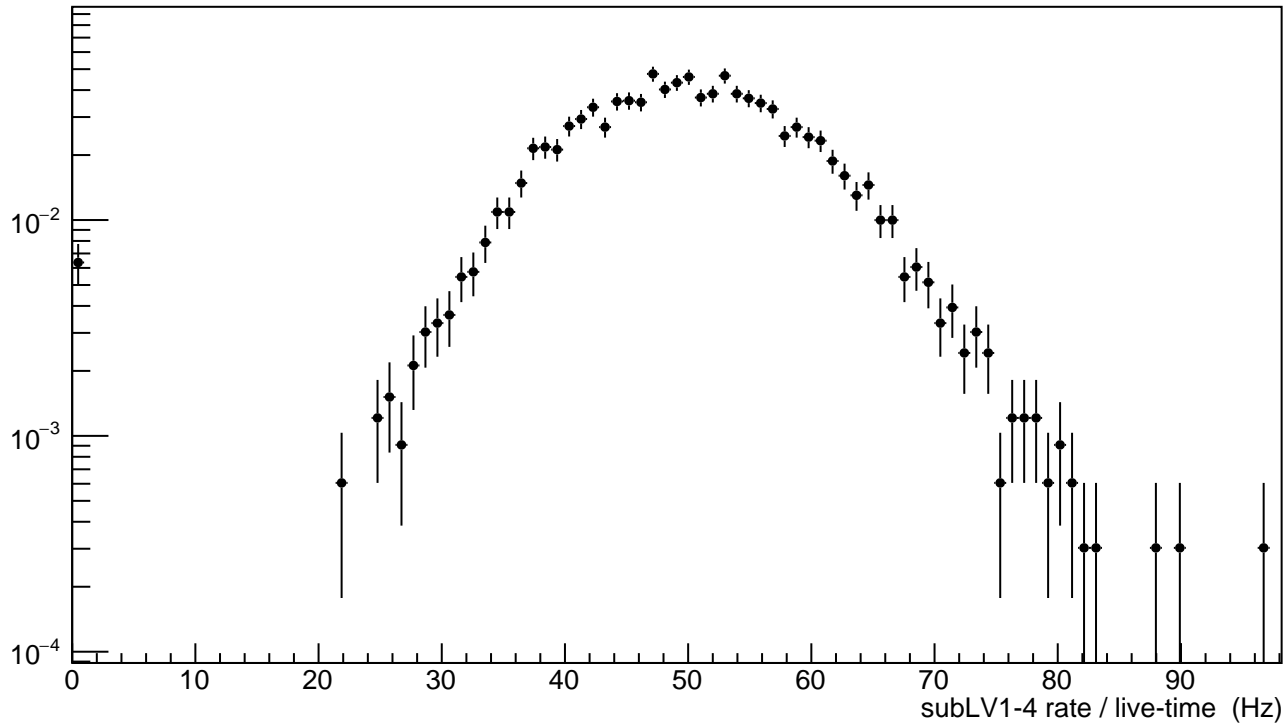

Supplement: s1 [file s1]

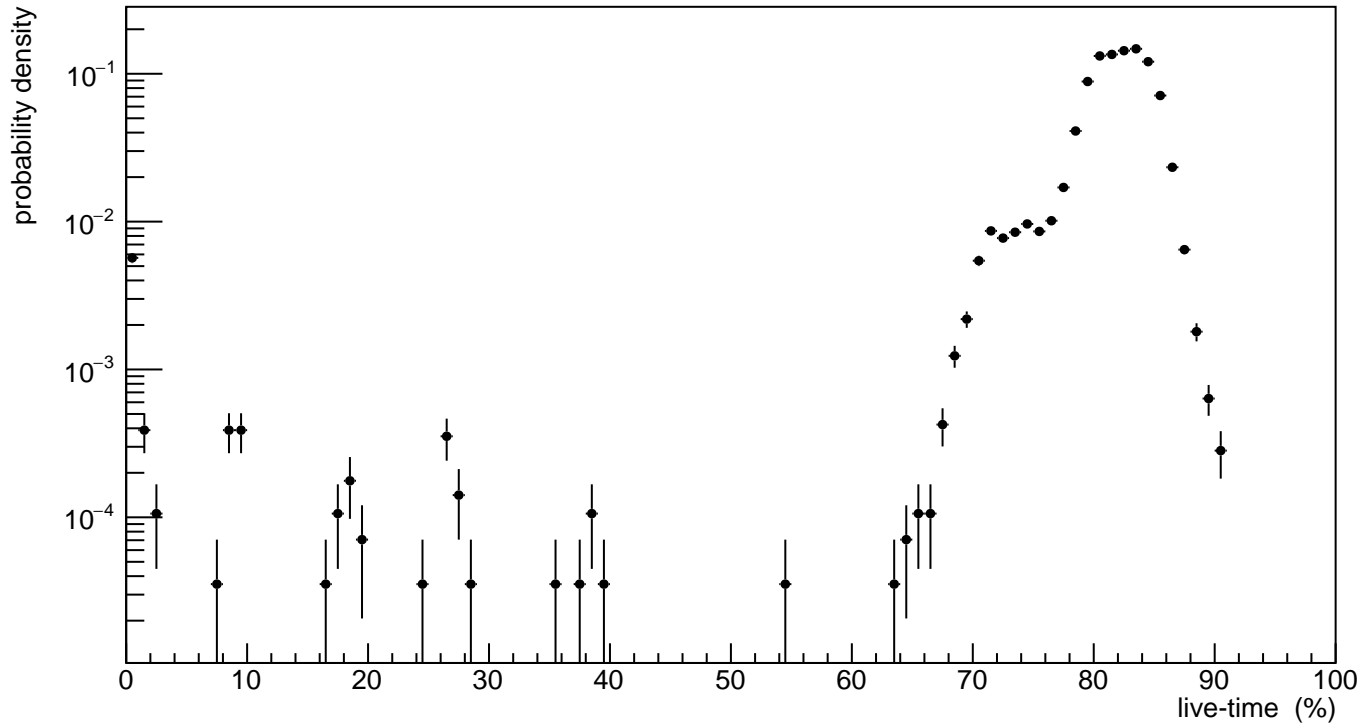

Supplement: s1 [file s1]

probability density

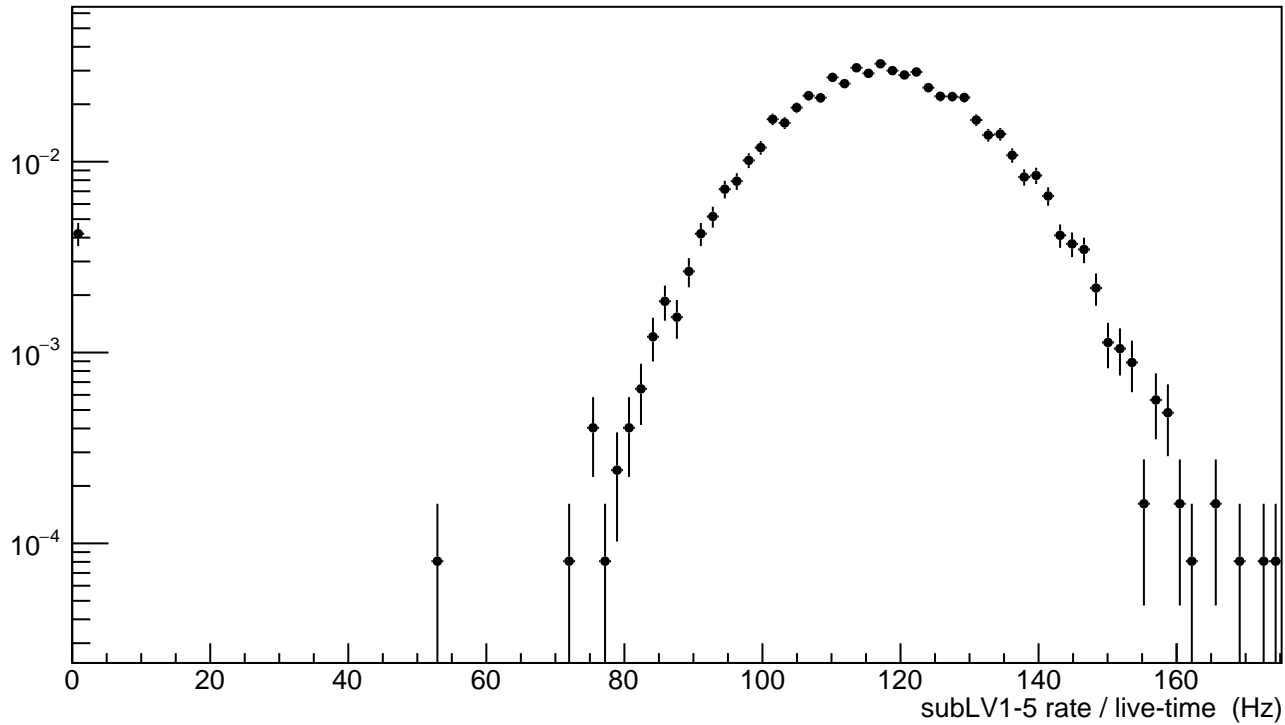

Supplement: s1 [file s1]

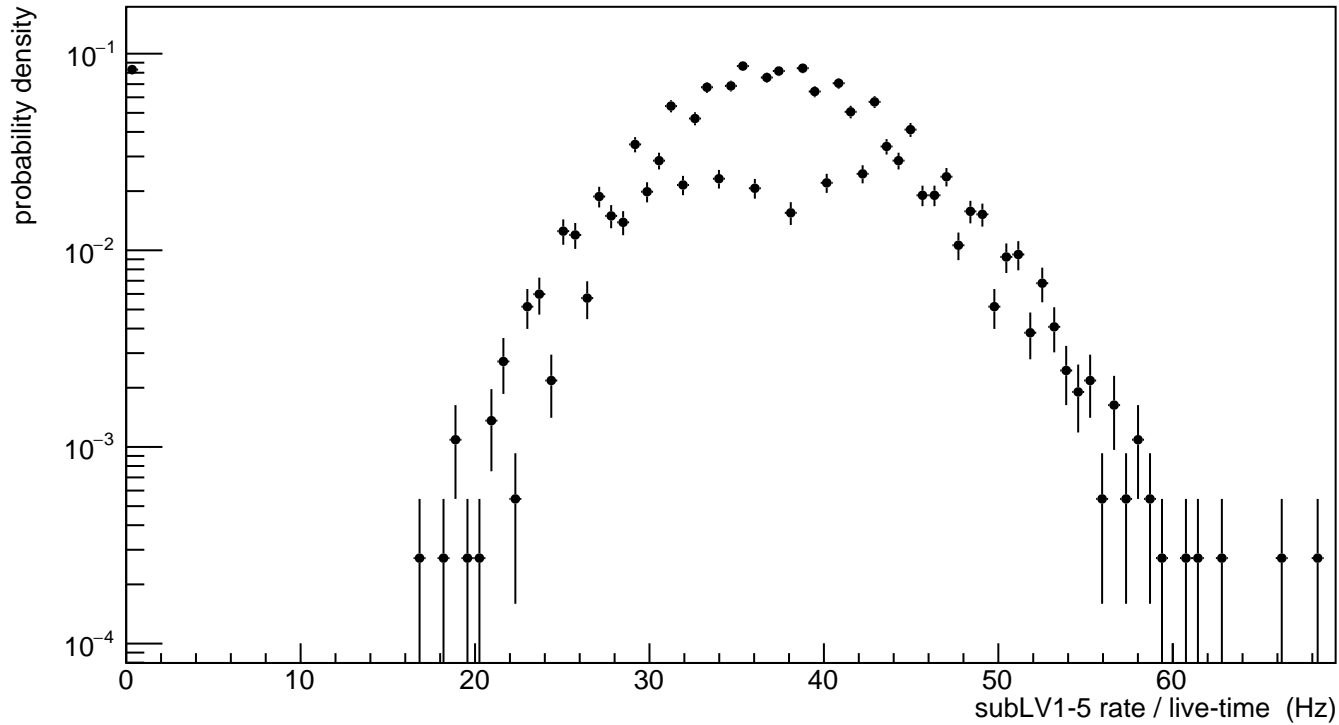

Supplement: s1 [file s1]

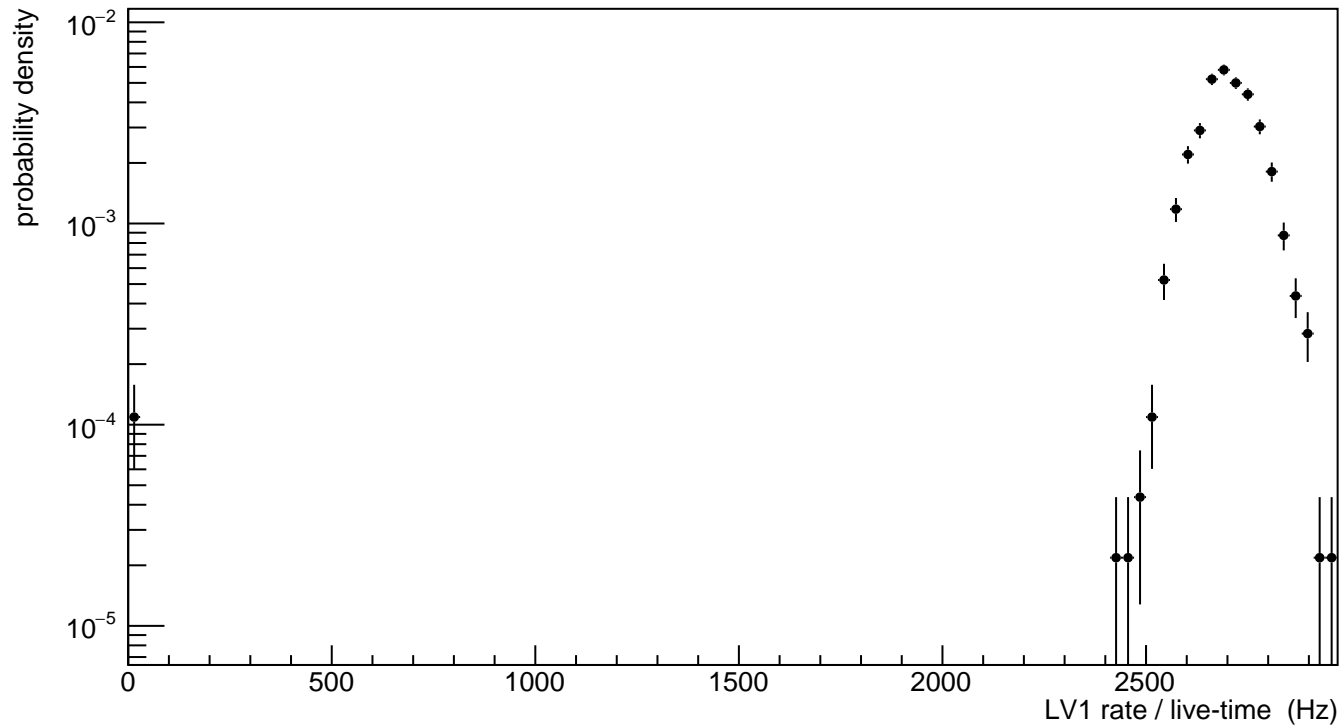

Supplement: s1 [file s1]

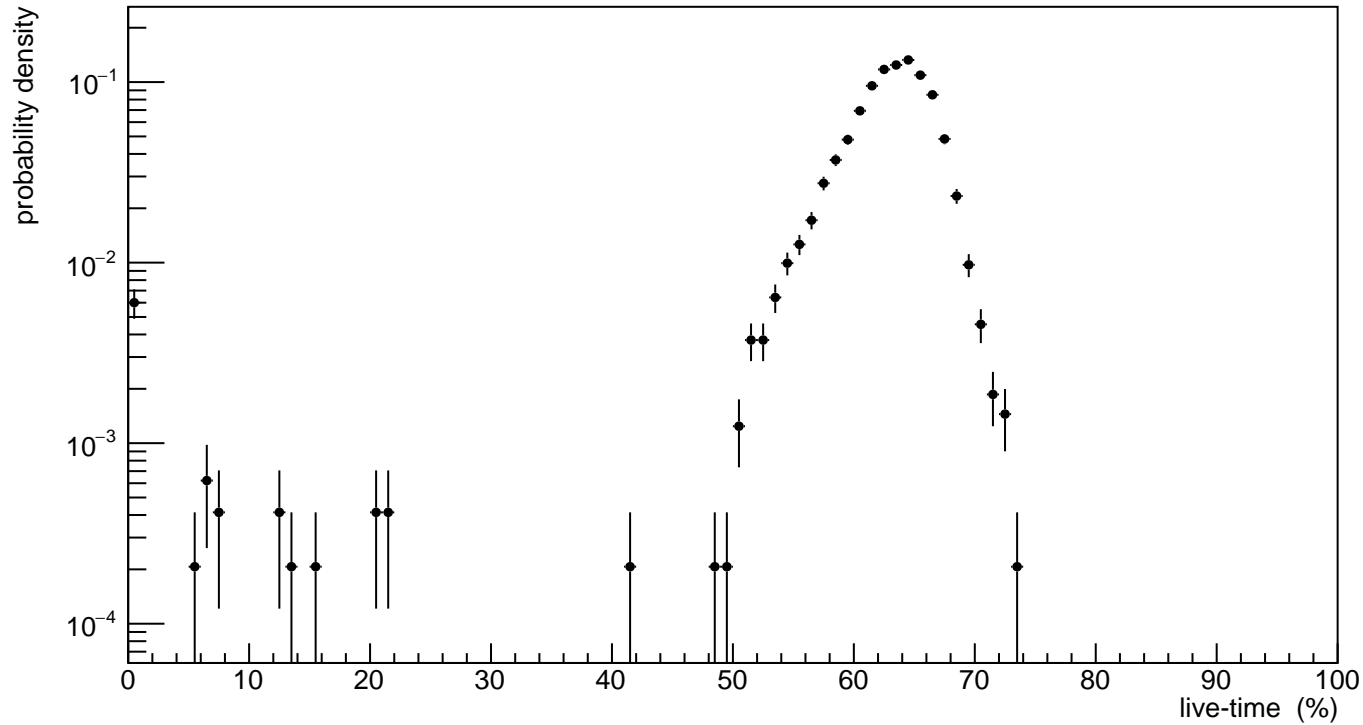

Supplement: s1 [file s1]

probability density

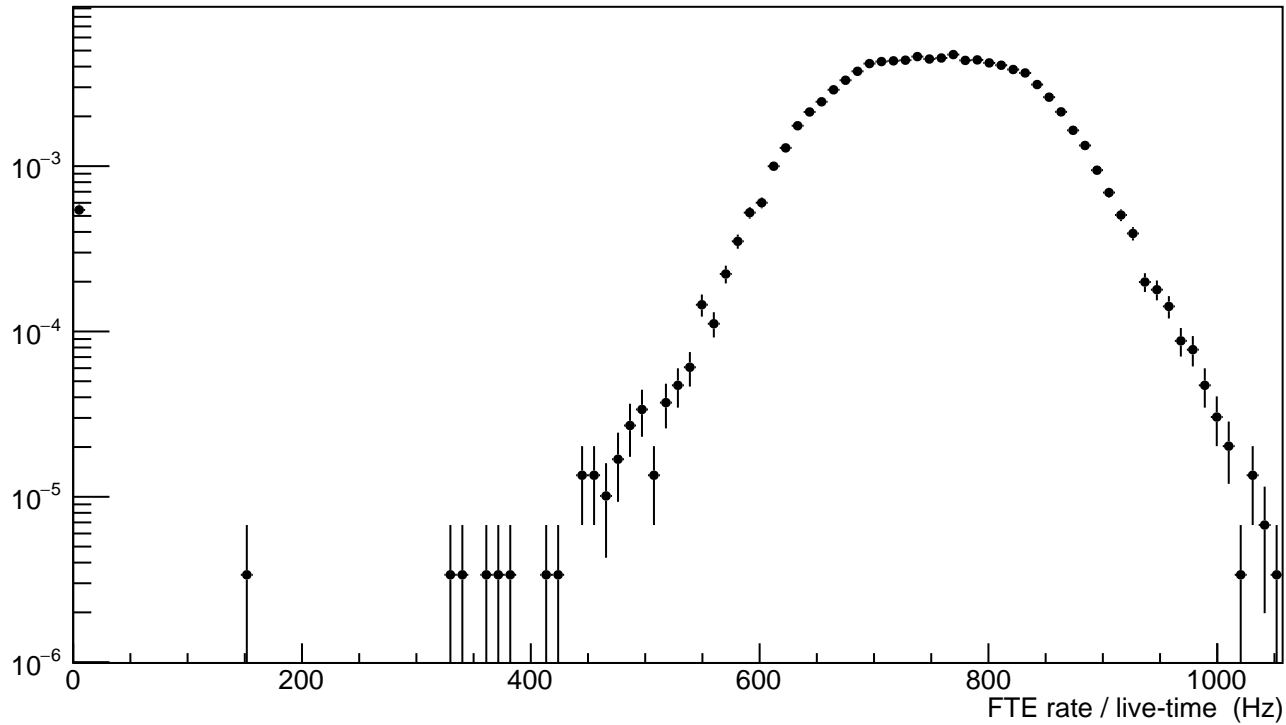

Supplement: s1 [file s1]

probability density

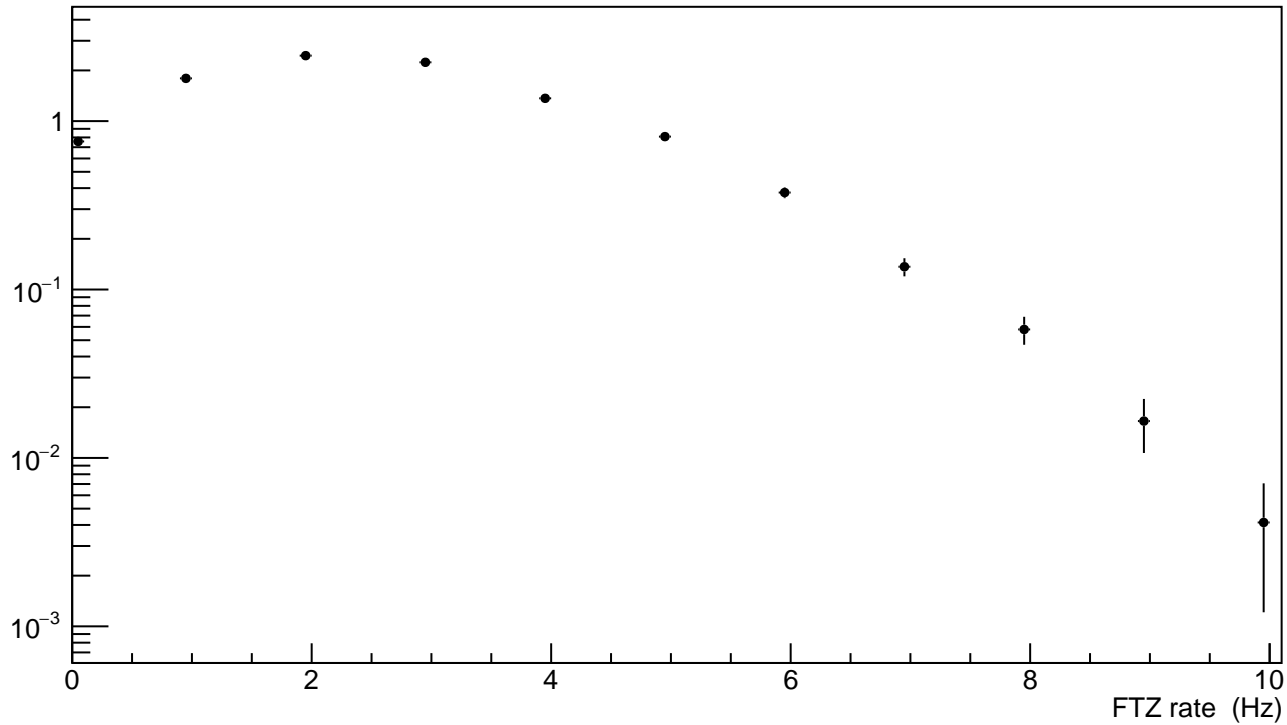

Supplement: s1 [file s1]

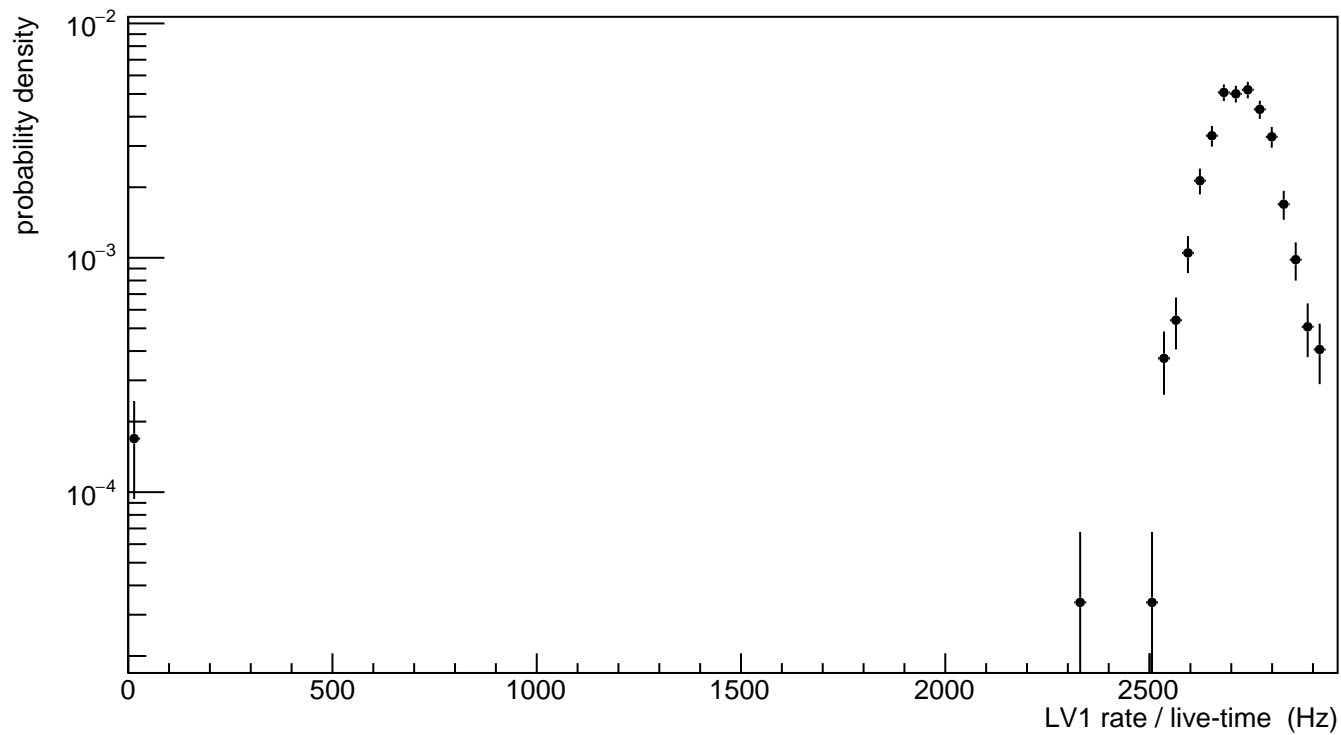

Supplement: s1 [file s1]

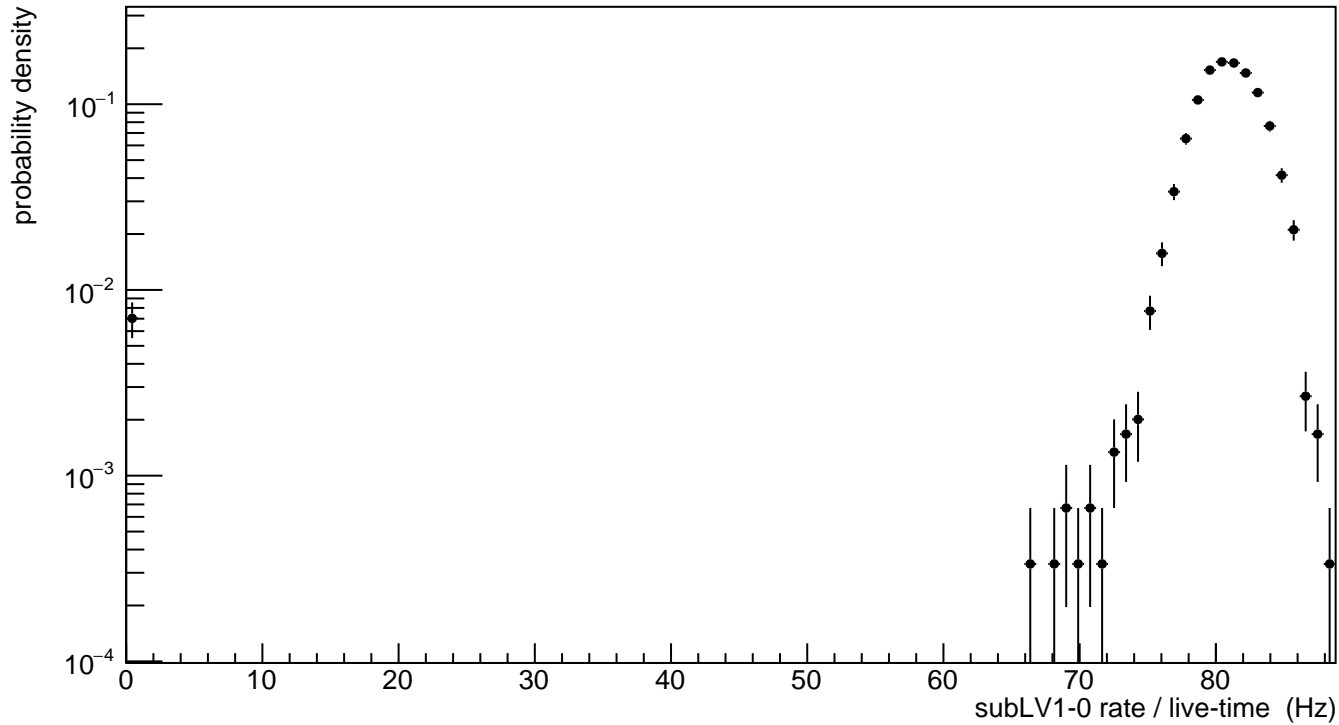

Supplement: s1 [file s1]

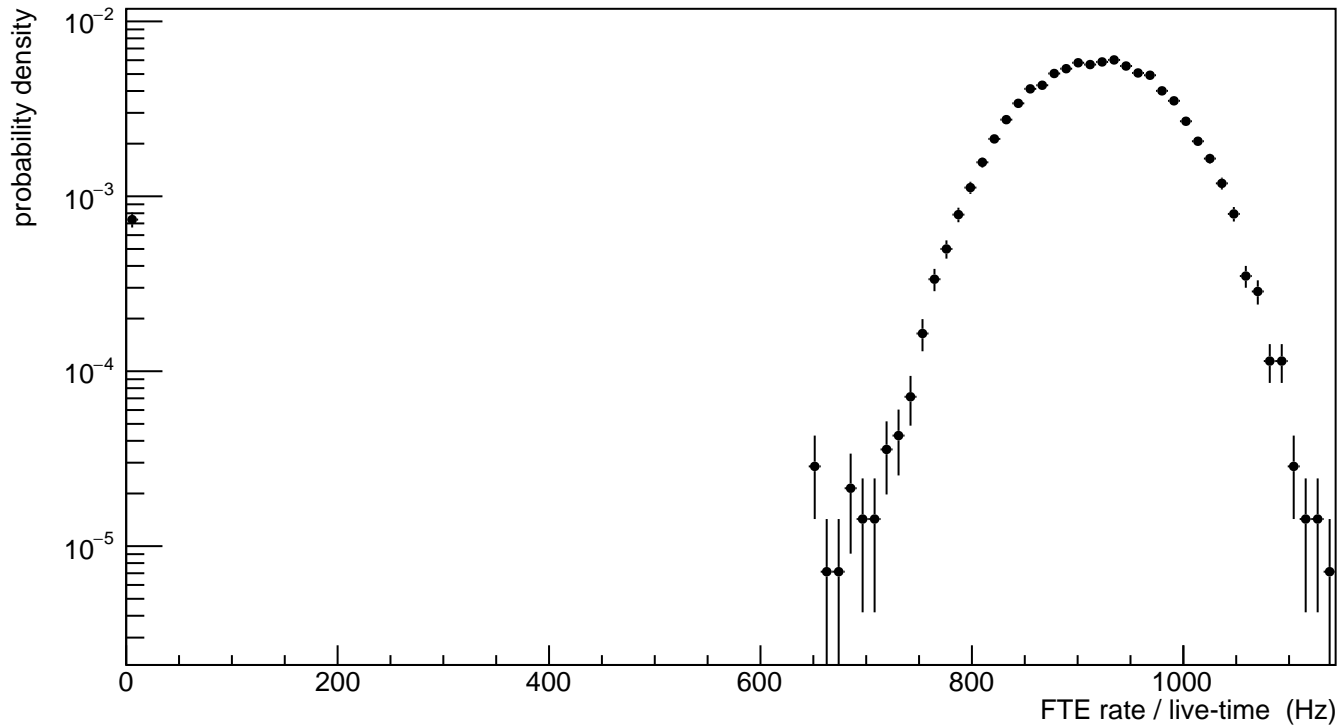

Supplement: s1 [file s1]

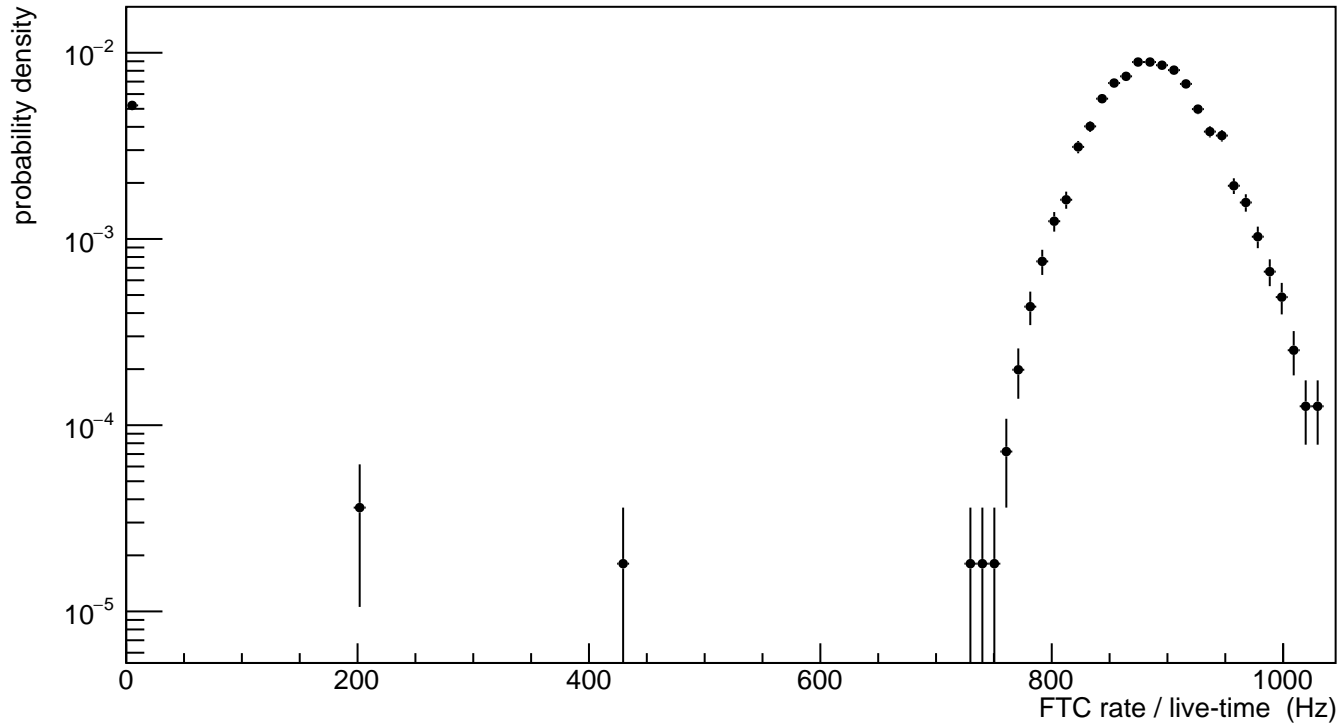

Supplement: s1 [file s1]

probability density

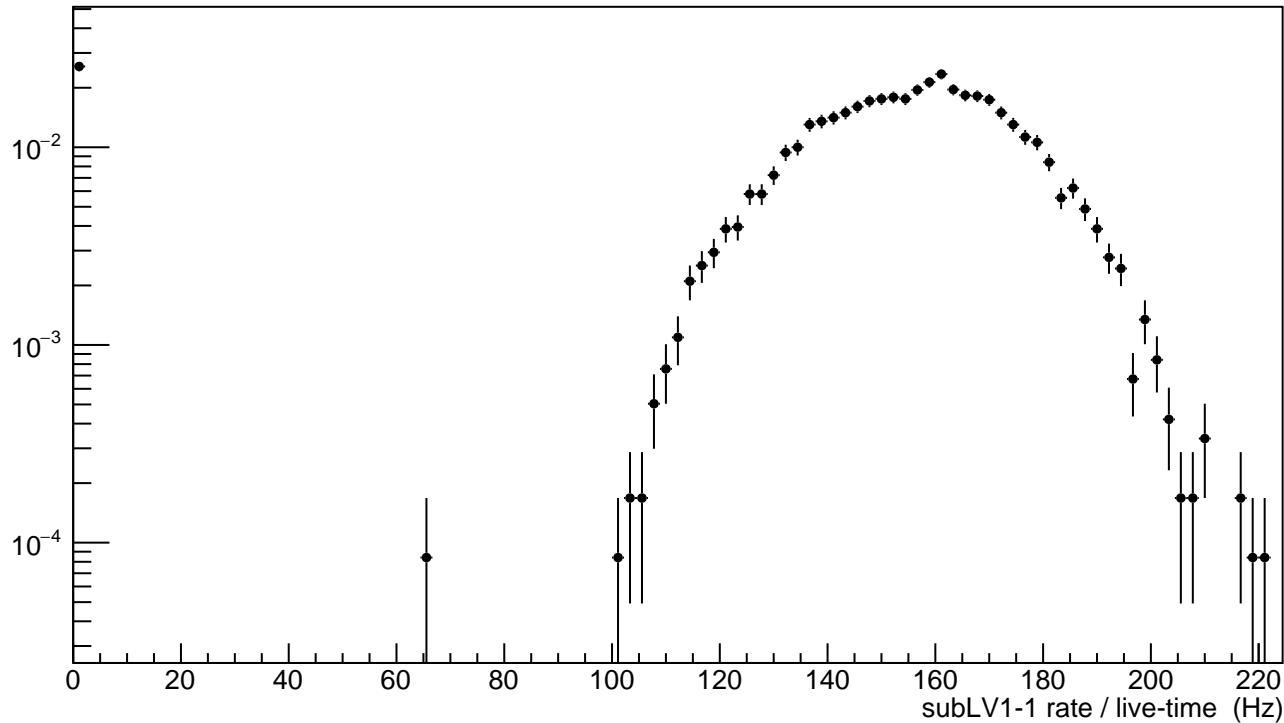

Supplement: s1 [file s1]

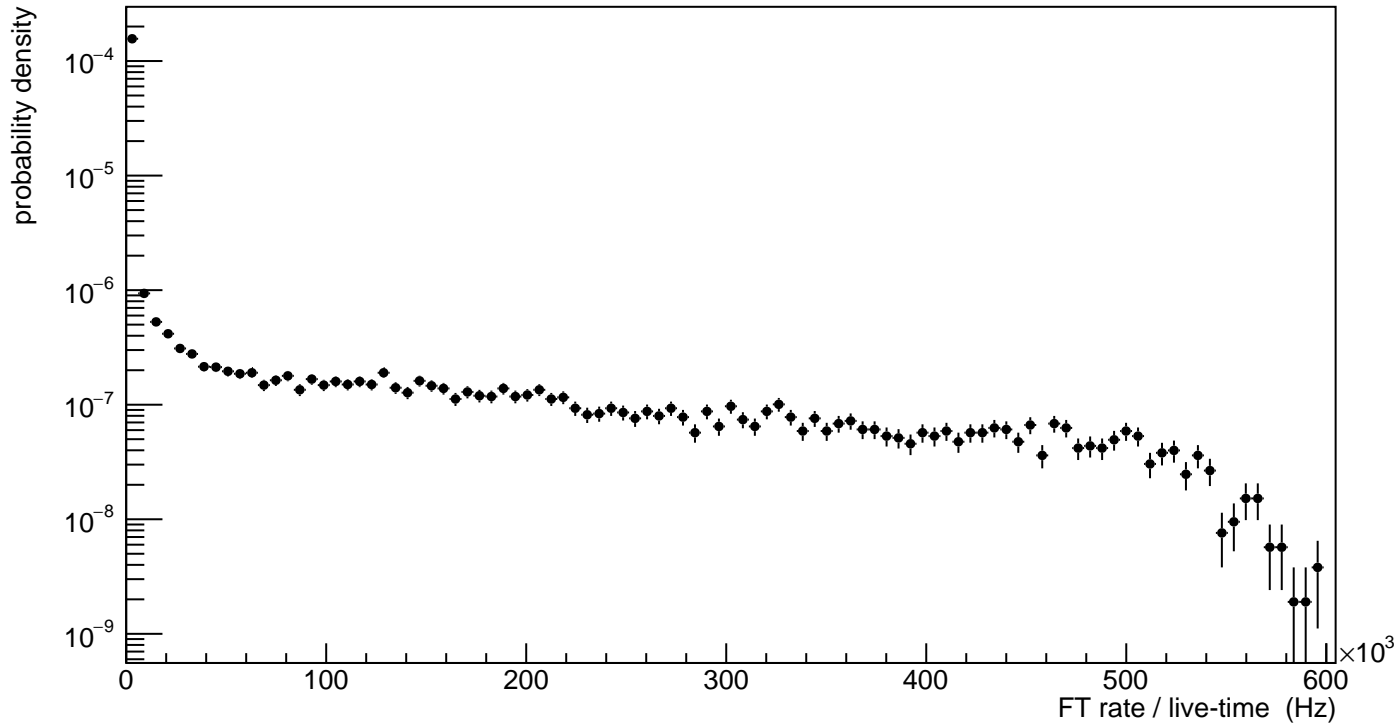

Supplement: s1 [file s1]
